# Supplementary material for: Transcriptomic Landscapes of Immune Response and Axonal Regeneration by Integrative Analysis of Molecular Pathways and Interactive Networks Post-sciatic Nerve Transection
Source: Front Neurosci. 2018 Jul 9;12:457. doi: 10.3389/fnins.2018.00457 (PMC6046400; doi:10.3389/fnins.2018.00457)
Supplement: Supplementary file 1 [file Table_1.XLS]

## Sheet: 37 genes
ProbeName	Symbol	1d(FC)	4d(FC)	7d(FC)	14d(FC)
A_44_P868890	GLI2	-1.83085	1.37994	1.80886	2.01083
A_44_P822616	EP300	-1.15307	1.06989	1.02249	1.31657
A_44_P792845	RUNX3	2.934	6.95001	6.4773	4.80691
A_44_P787936	STAT3	2.80132	2.37775	2.28761	2.11557
A_44_P556989	NGFR	3.88709	12.058	12.576	10.4781
A_44_P529455	GNRH1	-3.69769	-2.92891	-4.10091	-1.45752
A_44_P501277	NECTIN1	2.03212	2.16834	2.31394	1.61673
A_44_P500961	GDNF	11.8725	4.07746	4.62282	2.10318
A_44_P500457	ALCAM	-1.3682	1.18377	2.11767	2.3958
A_44_P496447	NTF3	-3.09677	-1.45336	-2.56305	-3.73299
A_44_P491590	CREB1	1.73142	2.03695	1.54994	1.32391
A_44_P481971	NRP1	2.86016	5.52551	6.98682	6.67627
A_44_P477819	NRG1	29.2309	7.93827	5.4847	3.08859
A_44_P439493	PLA2G10	5.15603	4.95021	4.84269	3.58263
A_44_P434271	CNTN2	-1.88417	-1.70627	-1.75119	-2.1069
A_44_P395709	RAC1	1.80384	2.07736	1.63139	1.20969
A_44_P392611	NFATC2	-2.27693	-1.27778	-1.07355	1.33386
A_44_P309013	MAPT	-2.72188	-2.78637	-1.77583	-1.29964
A_44_P264293	MAOA	-1.44156	-2.22916	-2.3027	-3.16287
A_44_P263159	MID1	3.00936	2.46691	2.57609	2.04904
A_44_P257582	CSF1R	2.12875	4.42415	3.35987	2.36696
A_44_P191862	HRAS	-1.16052	-1.77517	-1.8922	-1.71471
A_44_P177726	GFAP	3.34962	3.0883	2.07417	1.02327
A_44_P157721	HSPA8	3.41511	2.47428	1.878	1.6441
A_44_P1054883	APP	-1.44117	-1.03189	1.07674	1.19627
A_44_P1047933	MAPK1	21.3743	10.0988	5.27651	5.42591
A_44_P1034793	NEDD4L	1.16354	1.78534	1.71197	1.55984
A_44_P1006377	PTK2	-1.07161	1.23081	1.42238	1.40176
A_43_P19519	VCL	1.10093	1.39057	1.70542	1.64217
A_43_P15265	PPP3CB	-1.16548	-1.30522	-1.51306	-1.49322
A_43_P12665	MMP24	-1.95495	-2.80735	-4.46252	-3.69045
A_43_P12465	NRP2	-2.77953	-1.49709	-1.67643	1.05124
A_43_P11800	BAX	1.45254	1.26164	1.08565	1.0742
A_42_P602822	RET	-2.63534	-4.14691	-4.92987	-5.76937
A_42_P538400	NTRK2	-2.46416	-2.87781	-2.74273	-3.03904
A_42_P465601	MYH10	1.05976	2.33113	2.30196	2.58994
A_42_P461587	NGF	2.83882	1.76368	1.73647	1.45629

## Sheet: 1d
Expr Fold Change	ID	Symbol	Entrez Gene Name	Location	Type(s)
150.438	A_43_P15961	Clca3b	chloride channel accessory 3B	Other	ion channel
147.361	A_43_P14894	Nppb	natriuretic peptide type B	Other	other
94.491	A_44_P332790	TRH	thyrotropin releasing hormone	Extracellular Space	other
90.719	A_44_P377266	OLR1	oxidized low density lipoprotein receptor 1	Plasma Membrane	transmembrane receptor
88.805	A_44_P233786	VGF	VGF nerve growth factor inducible	Extracellular Space	growth factor
84.46	A_44_P311364	Clca3a1/Clca3a2	chloride channel accessory 3A1	Plasma Membrane	ion channel
84.314	A_44_P396842	UCN2	urocortin 2	Extracellular Space	other
54.261	A_44_P371339	IL6	interleukin 6	Extracellular Space	cytokine
50.504	A_44_P448431	CD8A	CD8a molecule	Plasma Membrane	other
46.861	A_42_P693821	FOSL1	FOS like 1, AP-1 transcription factor subunit	Nucleus	transcription regulator
44.215	A_44_P529645	MCEMP1	mast cell expressed membrane protein 1	Cytoplasm	other
44.091	A_43_P15819	PRSS22	protease, serine 22	Extracellular Space	peptidase
42.02	A_43_P11672	IL1RL1	interleukin 1 receptor like 1	Plasma Membrane	transmembrane receptor
40.881	A_44_P247281	CXCL14	C-X-C motif chemokine ligand 14	Extracellular Space	cytokine
35.61	A_44_P555271	MMP12	matrix metallopeptidase 12	Extracellular Space	peptidase
35.176	A_44_P1055780	S100A8	S100 calcium binding protein A8	Cytoplasm	other
33.509	A_44_P163242	EPCAM	epithelial cell adhesion molecule	Plasma Membrane	other
32.538	A_44_P372254	Slpi (includes others)	secretory leukocyte peptidase inhibitor	Cytoplasm	other
31.966	A_44_P487788	RD3L	retinal degeneration 3-like	Other	other
30.555	A_44_P276538	LILRB4	leukocyte immunoglobulin like receptor B4	Plasma Membrane	other
29.868	A_44_P470619	SRXN1	sulfiredoxin 1	Cytoplasm	enzyme
29.799	A_44_P292547	OR5AP2	olfactory receptor family 5 subfamily AP member 2	Plasma Membrane	G-protein coupled receptor
29.231	A_44_P477819	NRG1	neuregulin 1	Plasma Membrane	growth factor
28.545	A_44_P151156	Kng1/Kng2	kininogen 2	Extracellular Space	other
26.528	A_44_P183638	Pirb	paired Ig-like receptor B	Plasma Membrane	other
26.136	A_44_P1004757	SERPINB10	serpin family B member 10	Cytoplasm	other
24.58	A_44_P515197	CXCL3	C-X-C motif chemokine ligand 3	Extracellular Space	cytokine
24.506	A_44_P157314	CLEC4D	C-type lectin domain family 4 member D	Plasma Membrane	other
23.731	A_44_P340261	Stra6l	STRA6-like	Plasma Membrane	other
23.717	A_44_P363116	Cxcl3	chemokine (C-X-C motif) ligand 3	Extracellular Space	cytokine
22.949	A_42_P791677	AREG	amphiregulin	Extracellular Space	growth factor
21.45	A_44_P485051	Siglech	sialic acid binding Ig-like lectin H	Plasma Membrane	other
21.374	A_44_P1047933	MAPK1	mitogen-activated protein kinase 1	Cytoplasm	kinase
21.225	A_44_P353618	S100A9	S100 calcium binding protein A9	Cytoplasm	other
19.673	A_44_P501112	MMP9	matrix metallopeptidase 9	Extracellular Space	peptidase
19.442	A_44_P462661	IL1RN	interleukin 1 receptor antagonist	Extracellular Space	cytokine
18.918	A_43_P11861	DIO3	iodothyronine deiodinase 3	Plasma Membrane	enzyme
18.767	A_43_P11472	HMOX1	heme oxygenase 1	Cytoplasm	enzyme
18.65	A_44_P358151	Sectm1b	secreted and transmembrane 1B	Extracellular Space	cytokine
17.244	A_43_P13203	Wfdc17/Wfdc18	WAP four-disulfide core domain 18	Extracellular Space	other
17.157	A_44_P1013006	STEAP1	STEAP family member 1	Plasma Membrane	transporter
16.828	A_44_P114207	HK3	hexokinase 3	Cytoplasm	kinase
14.732	A_44_P739541	CXCL6	C-X-C motif chemokine ligand 6	Extracellular Space	cytokine
14.354	A_44_P156361	Olfr1231	olfactory receptor 1231	Plasma Membrane	G-protein coupled receptor
14.204	A_44_P365351	Olr1346	olfactory receptor 1346	Plasma Membrane	G-protein coupled receptor
13.69	A_44_P928825	MSR1	macrophage scavenger receptor 1	Plasma Membrane	transmembrane receptor
13.612	A_44_P440302	Olfr1179	olfactory receptor 1179	Plasma Membrane	G-protein coupled receptor
13.495	A_44_P458855	PTPRN	protein tyrosine phosphatase, receptor type N	Plasma Membrane	phosphatase
12.9	A_44_P266892	Olfr711	olfactory receptor 711	Plasma Membrane	G-protein coupled receptor
12.791	A_44_P550938	PCDH11X	protocadherin 11 X-linked	Plasma Membrane	other
12.351	A_44_P220455	CSF3R	colony stimulating factor 3 receptor	Plasma Membrane	transmembrane receptor
12.198	A_44_P452070	OR51I1	olfactory receptor family 51 subfamily I member 1	Plasma Membrane	G-protein coupled receptor
12.054	A_44_P990376	GPNMB	glycoprotein nmb	Plasma Membrane	enzyme
11.873	A_44_P500961	GDNF	glial cell derived neurotrophic factor	Extracellular Space	growth factor
11.59	A_44_P575152	C16orf96	chromosome 16 open reading frame 96	Other	other
11.386	A_44_P260663	PARVG	parvin gamma	Cytoplasm	other
11.317	A_44_P255817	PRAM1	PML-RARA regulated adaptor molecule 1	Other	other
10.957	A_44_P163301	Olr1171/Olr1177	olfactory receptor 1177	Other	other
10.793	A_44_P332505	ACPP	acid phosphatase, prostate	Extracellular Space	phosphatase
10.771	A_42_P480723	CD8B	CD8b molecule	Plasma Membrane	other
10.706	A_44_P112546	MRAP2	melanocortin 2 receptor accessory protein 2	Cytoplasm	other
10.528	A_44_P668582	ARHGAP25	Rho GTPase activating protein 25	Cytoplasm	other
10.347	A_44_P809374	CLCF1	cardiotrophin like cytokine factor 1	Extracellular Space	cytokine
10.058	A_44_P304220	EMB	embigin	Plasma Membrane	transporter
10.019	A_44_P410469	B430306N03Rik	RIKEN cDNA B430306N03 gene	Other	other
9.762	A_44_P308827	Olfr582	olfactory receptor 582	Plasma Membrane	G-protein coupled receptor
9.58	A_44_P247815	Olfr199/Olfr201	olfactory receptor 201	Plasma Membrane	G-protein coupled receptor
9.554	A_44_P473510	VSIG4	V-set and immunoglobulin domain containing 4	Plasma Membrane	other
9.474	A_44_P142043	OR6K6	olfactory receptor family 6 subfamily K member 6	Plasma Membrane	G-protein coupled receptor
9.388	A_44_P716457	LOC100911216/Pcsk1	proprotein convertase subtilisin/kexin type 1	Plasma Membrane	peptidase
9.208	A_44_P189496	FCGR1A	Fc fragment of IgG receptor Ia	Plasma Membrane	transmembrane receptor
9.208	A_44_P259851	OR4X1	olfactory receptor family 4 subfamily X member 1 (gene/pseudogene)	Plasma Membrane	G-protein coupled receptor
8.827	A_44_P121517	CD180	CD180 molecule	Plasma Membrane	other
8.691	A_44_P514627	ADGRL3	adhesion G protein-coupled receptor L3	Plasma Membrane	G-protein coupled receptor
8.421	A_44_P1039616	CD300C	CD300c molecule	Plasma Membrane	transmembrane receptor
8.374	A_43_P22042	PLA2G7	phospholipase A2 group VII	Extracellular Space	enzyme
8.354	A_44_P361000	GRXCR1	glutaredoxin and cysteine rich domain containing 1	Extracellular Space	other
8.343	A_44_P391118	Olfr1324	olfactory receptor 1324	Plasma Membrane	G-protein coupled receptor
8.269	A_44_P325522	LMNB1	lamin B1	Nucleus	other
8.257	A_42_P758222	ARG1	arginase 1	Cytoplasm	enzyme
8.007	A_42_P473398	CXCL2	C-X-C motif chemokine ligand 2	Extracellular Space	cytokine
7.91	A_43_P13122	Gucy2d	guanylate cyclase 2d	Other	enzyme
7.839	A_42_P820657	IL1R2	interleukin 1 receptor type 2	Plasma Membrane	transmembrane receptor
7.797	A_44_P484730	OR8H2	olfactory receptor family 8 subfamily H member 2	Plasma Membrane	G-protein coupled receptor
7.761	A_44_P974179	LCA5L	LCA5L, lebercilin like	Extracellular Space	other
7.654	A_42_P591344	ITGB2	integrin subunit beta 2	Plasma Membrane	transmembrane receptor
7.587	A_43_P12274	Lst1	leukocyte specific transcript 1	Cytoplasm	other
7.579	A_44_P346537	Olfr482	olfactory receptor 482	Plasma Membrane	G-protein coupled receptor
7.485	A_44_P326031	ATP8A2	ATPase phospholipid transporting 8A2	Plasma Membrane	transporter
7.321	A_44_P319979	VMP1	vacuole membrane protein 1	Plasma Membrane	other
7.293	A_44_P276803	ZNF341	zinc finger protein 341	Nucleus	other
7.254	A_43_P16370	OR4C45	olfactory receptor family 4 subfamily C member 45 (gene/pseudogene)	Plasma Membrane	G-protein coupled receptor
7.185	A_42_P585750	CD300LD	CD300 molecule like family member d	Plasma Membrane	other
7.159	A_43_P12403	FGR	FGR proto-oncogene, Src family tyrosine kinase	Nucleus	kinase
7.095	A_44_P859421	SH2D5	SH2 domain containing 5	Plasma Membrane	other
7.014	A_44_P433210	Olfr1208	olfactory receptor 1208	Plasma Membrane	G-protein coupled receptor
6.969	A_44_P704618	FAM167A	family with sequence similarity 167 member A	Cytoplasm	other
6.943	A_44_P101361	Hmga2	high mobility group AT-hook 2	Nucleus	enzyme
6.929	A_44_P866659	ADAM8	ADAM metallopeptidase domain 8	Plasma Membrane	peptidase
6.701	A_42_P661600	Reg3a	regenerating islet-derived 3 alpha	Extracellular Space	other
6.502	A_44_P487000	Olfr1181/Olfr1182	olfactory receptor 1181	Plasma Membrane	G-protein coupled receptor
6.478	A_42_P572521	C5AR1	complement C5a receptor 1	Plasma Membrane	G-protein coupled receptor
6.455	A_44_P714618	Arl4c	ADP-ribosylation factor like GTPase 4C	Cytoplasm	other
6.393	A_44_P546123	MCM5	minichromosome maintenance complex component 5	Nucleus	enzyme
6.382	A_44_P161823	4933415F23Rik	RIKEN cDNA 4933415F23 gene	Other	other
6.352	A_44_P288333	RGD1565560	similar to ribosomal protein S11	Other	other
6.288	A_44_P464045	ARL11	ADP ribosylation factor like GTPase 11	Other	other
6.147	A_44_P168405	FCGR2A	Fc fragment of IgG receptor IIa	Plasma Membrane	transmembrane receptor
6.111	A_44_P130063	CFI	complement factor I	Extracellular Space	peptidase
6.07	A_44_P210268	Olfr281	olfactory receptor 281	Plasma Membrane	G-protein coupled receptor
5.995	A_44_P605002	SLC45A4	solute carrier family 45 member 4	Other	transporter
5.931	A_44_P548126	SOCS3	suppressor of cytokine signaling 3	Cytoplasm	phosphatase
5.917	A_42_P495969	Apoc1	apolipoprotein C1	Extracellular Space	other
5.85	A_43_P14872	SDC1	syndecan 1	Plasma Membrane	enzyme
5.836	A_44_P550768	LOC102555173	uncharacterized LOC102555173	Other	other
5.818	A_43_P13420	SPON1	spondin 1	Extracellular Space	other
5.795	A_44_P452176	CHI3L1	chitinase 3 like 1	Extracellular Space	enzyme
5.785	A_44_P698466	LRRTM2	leucine rich repeat transmembrane neuronal 2	Plasma Membrane	other
5.73	A_44_P290953	CLVS1	clavesin 1	Cytoplasm	other
5.688	A_44_P192393	ACER1	alkaline ceramidase 1	Cytoplasm	enzyme
5.685	A_44_P1050595	CELA1	chymotrypsin like elastase family member 1	Extracellular Space	peptidase
5.61	A_44_P276338	MCM6	minichromosome maintenance complex component 6	Nucleus	enzyme
5.604	A_44_P247081	PLA2G2A	phospholipase A2 group IIA	Cytoplasm	enzyme
5.588	A_43_P20530	STEAP2	STEAP2 metalloreductase	Plasma Membrane	transporter
5.582	A_42_P735417	FCGR2B	Fc fragment of IgG receptor IIb	Plasma Membrane	transmembrane receptor
5.537	A_43_P15638	TNC	tenascin C	Extracellular Space	other
5.535	A_44_P507053	LOC690020	similar to killer cell lectin-like receptor, subfamily A, member 17	Other	other
5.476	A_42_P739860	DUSP5	dual specificity phosphatase 5	Nucleus	phosphatase
5.461	A_44_P363071	Olfr283	olfactory receptor 283	Plasma Membrane	G-protein coupled receptor
5.392	A_44_P249033	HMGA1	high mobility group AT-hook 1	Nucleus	transcription regulator
5.39	A_44_P400494	KRT18	keratin 18	Cytoplasm	other
5.37	A_44_P1009603	GTSE1	G2 and S-phase expressed 1	Cytoplasm	other
5.261	A_44_P163731	GALNTL6	polypeptide N-acetylgalactosaminyltransferase-like 6	Other	other
5.254	A_44_P443751	PDPN	podoplanin	Plasma Membrane	other
5.234	A_44_P975437	CLDN4	claudin 4	Plasma Membrane	transmembrane receptor
5.156	A_44_P439493	PLA2G10	phospholipase A2 group X	Cytoplasm	enzyme
5.092	A_44_P125761	Olfr1346	olfactory receptor 1346	Plasma Membrane	G-protein coupled receptor
5.067	A_44_P114788	ADAMTS8	ADAM metallopeptidase with thrombospondin type 1 motif 8	Extracellular Space	peptidase
5.011	A_44_P238222	SLC1A5	solute carrier family 1 member 5	Plasma Membrane	transporter
4.992	A_43_P11721	SELP	selectin P	Plasma Membrane	transmembrane receptor
4.927	A_44_P184297	RUNX2	runt related transcription factor 2	Nucleus	transcription regulator
4.907	A_43_P18241	CENPU	centromere protein U	Nucleus	other
4.898	A_44_P210173	TNFRSF12A	TNF receptor superfamily member 12A	Plasma Membrane	transmembrane receptor
4.847	A_42_P458530	RIPK3	receptor interacting serine/threonine kinase 3	Plasma Membrane	kinase
4.819	A_44_P269457	GPR83	G protein-coupled receptor 83	Plasma Membrane	G-protein coupled receptor
4.734	A_44_P355702	IGFBP3	insulin like growth factor binding protein 3	Extracellular Space	other
4.712	A_44_P760780	MCM3	minichromosome maintenance complex component 3	Nucleus	enzyme
4.71	A_43_P22562	Pira2	paired-Ig-like receptor A2	Other	other
4.669	A_44_P160841	Calcb	calcitonin-related polypeptide, beta	Extracellular Space	other
4.624	A_43_P17459	NIF3L1	NGG1 interacting factor 3 like 1	Cytoplasm	other
4.595	A_44_P398729	SBNO2	strawberry notch homolog 2	Other	transcription regulator
4.591	A_44_P338137	CCT6A	chaperonin containing TCP1 subunit 6A	Cytoplasm	other
4.57	A_43_P19763	TLR2	toll like receptor 2	Plasma Membrane	transmembrane receptor
4.542	A_44_P503428	UCK2	uridine-cytidine kinase 2	Cytoplasm	kinase
4.493	A_44_P577978	SLC39A14	solute carrier family 39 member 14	Plasma Membrane	transporter
4.489	A_44_P114000	Olfr398	olfactory receptor 398	Plasma Membrane	G-protein coupled receptor
4.478	A_44_P402559	OR10X1	olfactory receptor family 10 subfamily X member 1 (gene/pseudogene)	Plasma Membrane	G-protein coupled receptor
4.454	A_43_P12508	PTGER2	prostaglandin E receptor 2	Plasma Membrane	G-protein coupled receptor
4.452	A_44_P295563	COL7A1	collagen type VII alpha 1 chain	Extracellular Space	other
4.417	A_42_P567267	Mt1m/Mt2A	metallothionein 2A	Other	other
4.408	A_44_P777088	TRIP13	thyroid hormone receptor interactor 13	Cytoplasm	transcription regulator
4.381	A_44_P540755	Olfr315	olfactory receptor 315	Plasma Membrane	G-protein coupled receptor
4.365	A_43_P13109	CYP26A1	cytochrome P450 family 26 subfamily A member 1	Cytoplasm	enzyme
4.288	A_42_P602511	KCNN4	potassium calcium-activated channel subfamily N member 4	Plasma Membrane	ion channel
4.259	A_44_P831755	CCER1	coiled-coil glutamate rich protein 1	Other	other
4.256	A_44_P469584	CD14	CD14 molecule	Plasma Membrane	transmembrane receptor
4.252	A_43_P20099	MELTF	melanotransferrin	Plasma Membrane	other
4.246	A_44_P1039249	DOK3	docking protein 3	Cytoplasm	other
4.238	A_44_P309179	DTL	denticleless E3 ubiquitin protein ligase homolog	Nucleus	other
4.234	A_42_P638128	ACTG2	actin, gamma 2, smooth muscle, enteric	Cytoplasm	other
4.225	A_43_P17457	CD163	CD163 molecule	Plasma Membrane	transmembrane receptor
4.224	A_44_P340345	RPL10L	ribosomal protein L10 like	Nucleus	other
4.171	A_44_P578061	MAB21L3	mab-21 like 3	Other	other
4.147	A_44_P468141	PLAUR	plasminogen activator, urokinase receptor	Plasma Membrane	transmembrane receptor
4.11	A_44_P111368	PAK1IP1	PAK1 interacting protein 1	Nucleus	other
4.098	A_44_P507469	MYOF	myoferlin	Nucleus	other
4.095	A_44_P114851	TMEM8A	transmembrane protein 8A	Plasma Membrane	other
4.068	A_44_P347340	CCDC15	coiled-coil domain containing 15	Cytoplasm	other
4.066	A_44_P340587	MPEG1	macrophage expressed 1	Cytoplasm	other
4.055	A_44_P337300	IL4R	interleukin 4 receptor	Plasma Membrane	transmembrane receptor
4.029	A_44_P355663	C3	complement C3	Extracellular Space	peptidase
4.029	A_44_P355958	Olfr876	olfactory receptor 876	Plasma Membrane	G-protein coupled receptor
3.97	A_42_P527724	FCN1	ficolin 1	Extracellular Space	peptidase
3.938	A_44_P505039	CDK2	cyclin dependent kinase 2	Nucleus	kinase
3.927	A_44_P881475	PLIN2	perilipin 2	Plasma Membrane	other
3.926	A_44_P298049	NCF1	neutrophil cytosolic factor 1	Cytoplasm	enzyme
3.925	A_44_P311096	ABCB4	ATP binding cassette subfamily B member 4	Plasma Membrane	transporter
3.915	A_44_P463899	PILRB	paired immunoglobin-like type 2 receptor beta	Plasma Membrane	other
3.903	A_42_P601961	SUSD3	sushi domain containing 3	Plasma Membrane	other
3.901	A_44_P807649	SPRED3	sprouty related EVH1 domain containing 3	Extracellular Space	cytokine
3.894	A_44_P210547	KLRB1	killer cell lectin like receptor B1	Plasma Membrane	transmembrane receptor
3.887	A_44_P556989	NGFR	nerve growth factor receptor	Plasma Membrane	transmembrane receptor
3.864	A_44_P372587	CX3CR1	C-X3-C motif chemokine receptor 1	Plasma Membrane	G-protein coupled receptor
3.832	A_44_P130818	LGI3	leucine rich repeat LGI family member 3	Extracellular Space	other
3.821	A_43_P17028	FBLIM1	filamin binding LIM protein 1	Plasma Membrane	other
3.821	A_44_P1027971	GPR84	G protein-coupled receptor 84	Plasma Membrane	G-protein coupled receptor
3.815	A_44_P500935	SBK1	SH3 domain binding kinase 1	Other	kinase
3.806	A_44_P168184	Rasl2-9	RAS-like, family 2, locus 9	Nucleus	transporter
3.775	A_44_P551075	NFAM1	NFAT activating protein with ITAM motif 1	Plasma Membrane	transmembrane receptor
3.755	A_44_P239281	CDC6	cell division cycle 6	Nucleus	other
3.74	A_44_P335219	IL21R	interleukin 21 receptor	Plasma Membrane	transmembrane receptor
3.722	A_44_P930826	Clec2d (includes others)	C-type lectin domain family 2, member D	Plasma Membrane	other
3.721	A_43_P18226	MYO1F	myosin IF	Cytoplasm	other
3.71	A_44_P492723	ARHGAP8/PRR5-ARHGAP8	Rho GTPase activating protein 8	Cytoplasm	other
3.702	A_44_P1017415	WDR43	WD repeat domain 43	Nucleus	other
3.679	A_44_P236738	POLE2	DNA polymerase epsilon 2, accessory subunit	Nucleus	enzyme
3.679	A_42_P807697	TYROBP	TYRO protein tyrosine kinase binding protein	Plasma Membrane	transmembrane receptor
3.675	A_44_P975868	CD44	CD44 molecule (Indian blood group)	Plasma Membrane	other
3.635	A_44_P363736	FHL3	four and a half LIM domains 3	Plasma Membrane	other
3.599	A_42_P827359	MYBL2	MYB proto-oncogene like 2	Nucleus	transcription regulator
3.594	A_44_P962936	CDCA4	cell division cycle associated 4	Nucleus	other
3.591	A_44_P1022458	TUBB6	tubulin beta 6 class V	Cytoplasm	other
3.588	A_43_P15921	CCNF	cyclin F	Nucleus	enzyme
3.573	A_44_P443349	1700009N14Rik	RIKEN cDNA 1700009N14 gene	Other	transporter
3.568	A_44_P229376	SDAD1	SDA1 domain containing 1	Nucleus	other
3.567	A_44_P504019	ATP6AP2	ATPase H+ transporting accessory protein 2	Cytoplasm	transporter
3.549	A_44_P1027493	LIX1L	limb and CNS expressed 1 like	Other	other
3.54	A_44_P156462	REN	renin	Extracellular Space	peptidase
3.536	A_44_P1014388	MMS22L	MMS22 like, DNA repair protein	Nucleus	other
3.522	A_44_P192127	UGT3A1	UDP glycosyltransferase family 3 member A1	Cytoplasm	enzyme
3.519	A_44_P223446	MCM2	minichromosome maintenance complex component 2	Nucleus	enzyme
3.516	A_44_P623115	SLC43A2	solute carrier family 43 member 2	Plasma Membrane	transporter
3.513	A_44_P577090	RAD51	RAD51 recombinase	Nucleus	enzyme
3.49	A_44_P228942	RUNX1	runt related transcription factor 1	Nucleus	transcription regulator
3.489	A_44_P259977	ARNTL2	aryl hydrocarbon receptor nuclear translocator like 2	Nucleus	transcription regulator
3.489	A_44_P184484	ORC1	origin recognition complex subunit 1	Nucleus	other
3.479	A_44_P1024773	DSCC1	DNA replication and sister chromatid cohesion 1	Nucleus	other
3.465	A_44_P654498	C6orf141	chromosome 6 open reading frame 141	Other	other
3.455	A_44_P337335	CTRC	chymotrypsin C	Extracellular Space	peptidase
3.447	A_44_P492104	FERMT3	fermitin family member 3	Cytoplasm	enzyme
3.439	A_44_P1019324	EIF4A1	eukaryotic translation initiation factor 4A1	Cytoplasm	translation regulator
3.436	A_44_P461154	TIMP1	TIMP metallopeptidase inhibitor 1	Extracellular Space	cytokine
3.418	A_44_P441339	PHYHD1	phytanoyl-CoA dioxygenase domain containing 1	Other	other
3.415	A_44_P157721	HSPA8	heat shock protein family A (Hsp70) member 8	Cytoplasm	enzyme
3.405	A_44_P525969	CYBB	cytochrome b-245 beta chain	Cytoplasm	enzyme
3.403	A_43_P11749	HCK	HCK proto-oncogene, Src family tyrosine kinase	Cytoplasm	kinase
3.394	A_44_P997586	PLK4	polo like kinase 4	Cytoplasm	kinase
3.392	A_44_P161550	ATP8B4	ATPase phospholipid transporting 8B4 (putative)	Plasma Membrane	transporter
3.389	A_44_P311136	VAV1	vav guanine nucleotide exchange factor 1	Nucleus	transcription regulator
3.383	A_44_P237153	BIRC5	baculoviral IAP repeat containing 5	Cytoplasm	other
3.381	A_44_P232205	BIN2	bridging integrator 2	Plasma Membrane	other
3.365	A_44_P1029131	IL33	interleukin 33	Extracellular Space	cytokine
3.35	A_44_P945669	DSN1	DSN1 homolog, MIS12 kinetochore complex component	Nucleus	other
3.35	A_44_P177726	GFAP	glial fibrillary acidic protein	Cytoplasm	other
3.346	A_43_P10939	PCLAF	PCNA clamp associated factor	Nucleus	other
3.341	A_44_P161233	IL18	interleukin 18	Extracellular Space	cytokine
3.322	A_44_P151574	Olr1401	olfactory receptor 1401	Other	other
3.31	A_43_P15106	E2F8	E2F transcription factor 8	Nucleus	transcription regulator
3.303	A_44_P925486	CD300A	CD300a molecule	Plasma Membrane	transmembrane receptor
3.281	A_44_P494754	CLSPN	claspin	Nucleus	other
3.258	A_42_P608780	GDF15	growth differentiation factor 15	Extracellular Space	growth factor
3.239	A_43_P10020	LYZ	lysozyme	Extracellular Space	enzyme
3.232	A_44_P381917	SPHK1	sphingosine kinase 1	Cytoplasm	kinase
3.223	A_44_P261720	RGD1563351	RGD1563351	Other	other
3.191	A_44_P508945	HEYL	hes related family bHLH transcription factor with YRPW motif-like	Nucleus	transcription regulator
3.186	A_44_P507571	CCNE1	cyclin E1	Nucleus	transcription regulator
3.185	A_42_P467630	SLC22A1	solute carrier family 22 member 1	Plasma Membrane	transporter
3.182	A_42_P708181	KNTC1	kinetochore associated 1	Nucleus	other
3.176	A_44_P411954	CD2	CD2 molecule	Plasma Membrane	transmembrane receptor
3.162	A_42_P799494	HTATIP2	HIV-1 Tat interactive protein 2	Nucleus	transcription regulator
3.157	A_44_P161899	OCIAD2	OCIA domain containing 2	Cytoplasm	other
3.151	A_42_P579174	CD3D	CD3d molecule	Plasma Membrane	transmembrane receptor
3.15	A_44_P1035483	THBS2	thrombospondin 2	Extracellular Space	other
3.128	A_44_P289652	MOSPD2	motile sperm domain containing 2	Other	other
3.117	A_44_P192406	DUSP9	dual specificity phosphatase 9	Nucleus	phosphatase
3.117	A_44_P839432	GLIS3	GLIS family zinc finger 3	Nucleus	transcription regulator
3.115	A_44_P265058	GMNN	geminin, DNA replication inhibitor	Nucleus	transcription regulator
3.104	A_44_P756335	RBM26	RNA binding motif protein 26	Other	other
3.101	A_44_P880146	BID	BH3 interacting domain death agonist	Cytoplasm	other
3.094	A_44_P483238	HOXC5	homeobox C5	Nucleus	transcription regulator
3.083	A_44_P1042360	Clec4a3	C-type lectin domain family 4, member a3	Other	other
3.072	A_44_P779178	RBM44	RNA binding motif protein 44	Other	other
3.068	A_44_P426788	PMEPA1	prostate transmembrane protein, androgen induced 1	Plasma Membrane	other
3.053	A_44_P405793	NPAS2	neuronal PAS domain protein 2	Nucleus	transcription regulator
3.047	A_44_P419810	LRR1	leucine rich repeat protein 1	Other	enzyme
3.042	A_43_P17424	CHAF1B	chromatin assembly factor 1 subunit B	Nucleus	other
3.033	A_44_P365611	GPR31	G protein-coupled receptor 31	Plasma Membrane	G-protein coupled receptor
3.033	A_44_P173330	SNX20	sorting nexin 20	Cytoplasm	other
3.024	A_44_P655718	FAM72A	family with sequence similarity 72 member A	Cytoplasm	other
3.023	A_43_P12529	STXBP2	syntaxin binding protein 2	Plasma Membrane	transporter
3.022	A_44_P759995	Tnfrsf22/Tnfrsf23	tumor necrosis factor receptor superfamily, member 22	Plasma Membrane	transmembrane receptor
3.021	A_44_P293904	SYK	spleen associated tyrosine kinase	Cytoplasm	kinase
3.014	A_44_P763036	IL10RA	interleukin 10 receptor subunit alpha	Plasma Membrane	transmembrane receptor
3.01	A_44_P543548	TRA2B	transformer 2 beta homolog	Nucleus	other
3.009	A_44_P263159	MID1	midline 1	Nucleus	other
3	A_43_P22080	LCP1	lymphocyte cytosolic protein 1	Cytoplasm	other
2.999	A_44_P527480	CCNA2	cyclin A2	Nucleus	other
2.989	A_44_P153516	SLC18A2	solute carrier family 18 member A2	Plasma Membrane	transporter
2.98	A_42_P676304	Ifitm1	interferon induced transmembrane protein 1	Other	other
2.974	A_44_P108304	SLC41A2	solute carrier family 41 member 2	Plasma Membrane	transporter
2.972	A_43_P21520	LRP8	LDL receptor related protein 8	Plasma Membrane	transmembrane receptor
2.956	A_43_P13083	TACR2	tachykinin receptor 2	Plasma Membrane	G-protein coupled receptor
2.941	A_42_P679371	CORO1A	coronin 1A	Cytoplasm	other
2.934	A_44_P433935	PLAC1	placenta specific 1	Plasma Membrane	other
2.934	A_44_P792845	RUNX3	runt related transcription factor 3	Nucleus	transcription regulator
2.924	A_44_P1037706	GLOD5	glyoxalase domain containing 5	Other	other
2.921	A_44_P468468	LBP	lipopolysaccharide binding protein	Plasma Membrane	transporter
2.912	A_44_P225952	INHBA	inhibin beta A subunit	Extracellular Space	growth factor
2.91	A_44_P296924	RDH10	retinol dehydrogenase 10	Nucleus	enzyme
2.896	A_43_P12172	LGMN	legumain	Cytoplasm	peptidase
2.894	A_44_P334891	RCL1	RNA terminal phosphate cyclase like 1	Nucleus	enzyme
2.891	A_44_P402641	UGT1A3	UDP glucuronosyltransferase family 1 member A3	Cytoplasm	enzyme
2.89	A_44_P286409	TTK	TTK protein kinase	Nucleus	kinase
2.882	A_44_P150185	LTBP2	latent transforming growth factor beta binding protein 2	Extracellular Space	other
2.872	A_43_P12125	JUNB	JunB proto-oncogene, AP-1 transcription factor subunit	Nucleus	transcription regulator
2.87	A_44_P276120	KISS1R	KISS1 receptor	Plasma Membrane	G-protein coupled receptor
2.865	A_44_P850143	TLX2	T-cell leukemia homeobox 2	Nucleus	transcription regulator
2.863	A_44_P606394	LOC102637882	pituitary homeobox 3-like	Nucleus	transcription regulator
2.862	A_44_P438060	GNA15	G protein subunit alpha 15	Plasma Membrane	enzyme
2.86	A_44_P481971	NRP1	neuropilin 1	Plasma Membrane	transmembrane receptor
2.856	A_43_P17059	CRLF1	cytokine receptor like factor 1	Extracellular Space	other
2.85	A_44_P211182	NABP1	nucleic acid binding protein 1	Nucleus	other
2.849	A_44_P225286	MGAT4A	mannosyl (alpha-1,3-)-glycoprotein beta-1,4-N-acetylglucosaminyltransferase, isozyme A	Cytoplasm	enzyme
2.848	A_44_P508554	NCF2	neutrophil cytosolic factor 2	Cytoplasm	enzyme
2.839	A_42_P461587	NGF	nerve growth factor	Extracellular Space	growth factor
2.829	A_44_P121556	TMA16	translation machinery associated 16 homolog	Nucleus	other
2.823	A_44_P201276	Lilrb3	leukocyte immunoglobulin like receptor B3	Other	other
2.822	A_44_P1038296	CD68	CD68 molecule	Plasma Membrane	other
2.818	A_42_P598412	APOBEC1	apolipoprotein B mRNA editing enzyme catalytic subunit 1	Cytoplasm	enzyme
2.818	A_44_P304800	Col4a5	collagen type IV alpha 5 chain	Extracellular Space	other
2.803	A_44_P548203	RBM3	RNA binding motif (RNP1, RRM) protein 3	Cytoplasm	other
2.801	A_44_P787936	STAT3	signal transducer and activator of transcription 3	Nucleus	transcription regulator
2.798	A_44_P452632	IRF8	interferon regulatory factor 8	Nucleus	transcription regulator
2.791	A_42_P753675	ARHGDIG	Rho GDP dissociation inhibitor gamma	Cytoplasm	other
2.787	A_43_P20126	CENPH	centromere protein H	Nucleus	other
2.78	A_44_P428420	CTSZ	cathepsin Z	Cytoplasm	peptidase
2.763	A_44_P1057707	PNO1	partner of NOB1 homolog	Nucleus	other
2.748	A_44_P421534	AIF1	allograft inflammatory factor 1	Nucleus	other
2.748	A_44_P166406	MRTO4	MRT4 homolog, ribosome maturation factor	Cytoplasm	other
2.746	A_44_P100443	UNG	uracil DNA glycosylase	Nucleus	enzyme
2.743	A_42_P800988	PTAFR	platelet activating factor receptor	Plasma Membrane	G-protein coupled receptor
2.741	A_44_P372907	ME2	malic enzyme 2	Cytoplasm	enzyme
2.736	A_42_P508984	PF4	platelet factor 4	Extracellular Space	cytokine
2.732	A_43_P23155	MCM10	minichromosome maintenance 10 replication initiation factor	Nucleus	other
2.729	A_44_P358883	ZNF831	zinc finger protein 831	Other	other
2.713	A_44_P140669	ABI3	ABI family member 3	Plasma Membrane	other
2.708	A_44_P380300	TONSL	tonsoku like, DNA repair protein	Cytoplasm	transcription regulator
2.705	A_44_P217744	LOC100911403/Ms4a4a	membrane-spanning 4-domains, subfamily A, member 4A	Other	other
2.705	A_44_P278439	UBE2N	ubiquitin conjugating enzyme E2 N	Cytoplasm	enzyme
2.702	A_44_P515548	LOC685020/Pilra	paired immunoglobin-like type 2 receptor alpha	Cytoplasm	other
2.694	A_44_P144741	BLNK	B-cell linker	Cytoplasm	other
2.694	A_44_P238978	CDT1	chromatin licensing and DNA replication factor 1	Nucleus	other
2.691	A_44_P384273	KCNK12	potassium two pore domain channel subfamily K member 12	Plasma Membrane	ion channel
2.688	A_44_P766913	TRPM2	transient receptor potential cation channel subfamily M member 2	Plasma Membrane	ion channel
2.683	A_44_P435955	PILRA	paired immunoglobin like type 2 receptor alpha	Plasma Membrane	other
2.68	A_44_P363156	HNRNPD	heterogeneous nuclear ribonucleoprotein D	Nucleus	transcription regulator
2.665	A_44_P520058	UHRF1	ubiquitin like with PHD and ring finger domains 1	Nucleus	transcription regulator
2.663	A_44_P281297	IPO5	importin 5	Nucleus	transporter
2.659	A_44_P508239	SHMT1	serine hydroxymethyltransferase 1	Cytoplasm	enzyme
2.657	A_44_P323106	ABCA1	ATP binding cassette subfamily A member 1	Plasma Membrane	transporter
2.654	A_44_P518576	MIS18A	MIS18 kinetochore protein A	Nucleus	other
2.653	A_43_P18895	SORCS2	sortilin related VPS10 domain containing receptor 2	Plasma Membrane	transporter
2.636	A_44_P258773	FADD	Fas associated via death domain	Cytoplasm	other
2.634	A_44_P884566	NKAIN1	sodium/potassium transporting ATPase interacting 1	Plasma Membrane	other
2.628	A_44_P337691	MFSD1	major facilitator superfamily domain containing 1	Other	transporter
2.622	A_44_P1024529	SRSF2	serine and arginine rich splicing factor 2	Nucleus	transcription regulator
2.621	A_44_P407573	CNFN	cornifelin	Cytoplasm	other
2.621	A_42_P829863	GALK1	galactokinase 1	Cytoplasm	kinase
2.62	A_43_P12276	VAX1	ventral anterior homeobox 1	Nucleus	transcription regulator
2.619	A_44_P431488	LOC103690888	60S ribosomal protein L10a-like	Other	other
2.617	A_42_P799208	CHST11	carbohydrate sulfotransferase 11	Cytoplasm	enzyme
2.617	A_44_P619150	KPNB1	karyopherin subunit beta 1	Nucleus	transporter
2.612	A_43_P21322	HCLS1	hematopoietic cell-specific Lyn substrate 1	Nucleus	other
2.612	A_43_P17490	RRM2	ribonucleotide reductase regulatory subunit M2	Nucleus	enzyme
2.604	A_42_P685287	FXYD5	FXYD domain containing ion transport regulator 5	Plasma Membrane	ion channel
2.603	A_44_P764517	SLC4A7	solute carrier family 4 member 7	Plasma Membrane	transporter
2.602	A_43_P16265	Olfr1353	olfactory receptor 1353	Plasma Membrane	G-protein coupled receptor
2.595	A_44_P252517	Havcr1	hepatitis A virus cellular receptor 1	Plasma Membrane	other
2.578	A_44_P132533	RFC4	replication factor C subunit 4	Nucleus	other
2.578	A_44_P447623	UGDH	UDP-glucose 6-dehydrogenase	Nucleus	enzyme
2.576	A_44_P424135	MS4A3	membrane spanning 4-domains A3	Plasma Membrane	other
2.567	A_44_P292568	OR2D2	olfactory receptor family 2 subfamily D member 2	Plasma Membrane	G-protein coupled receptor
2.567	A_44_P251081	TTYH2	tweety family member 2	Other	ion channel
2.563	A_44_P351209	PHLDA1	pleckstrin homology like domain family A member 1	Cytoplasm	other
2.551	A_44_P449929	MAPK11	mitogen-activated protein kinase 11	Cytoplasm	kinase
2.551	A_44_P365240	PTPN2	protein tyrosine phosphatase, non-receptor type 2	Cytoplasm	phosphatase
2.55	A_44_P251706	SLC1A1	solute carrier family 1 member 1	Plasma Membrane	transporter
2.549	A_43_P19441	CENPN	centromere protein N	Nucleus	other
2.548	A_44_P838888	BRIP1	BRCA1 interacting protein C-terminal helicase 1	Nucleus	enzyme
2.535	A_44_P1030098	CDC45	cell division cycle 45	Nucleus	other
2.533	A_44_P461857	LOC102547986	40S ribosomal protein S2-like	Other	other
2.532	A_44_P318861	WDFY4	WDFY family member 4	Other	other
2.531	A_44_P365642	KLK5	kallikrein related peptidase 5	Extracellular Space	peptidase
2.531	A_44_P1040503	PCTP	phosphatidylcholine transfer protein	Cytoplasm	transporter
2.526	A_44_P531324	ARHGAP9	Rho GTPase activating protein 9	Cytoplasm	other
2.526	A_44_P206434	LMNB2	lamin B2	Nucleus	other
2.526	A_44_P187167	TUBB2B	tubulin beta 2B class IIb	Cytoplasm	other
2.511	A_44_P270468	SLC15A3	solute carrier family 15 member 3	Cytoplasm	transporter
2.505	A_44_P290786	LRIT3	leucine rich repeat, Ig-like and transmembrane domains 3	Other	other
2.504	A_44_P305836	EPC2	enhancer of polycomb homolog 2	Other	other
2.503	A_44_P438272	Crisp1/Crisp3	cysteine-rich secretory protein 1	Extracellular Space	other
2.502	A_44_P149114	ATP6V1B2	ATPase H+ transporting V1 subunit B2	Cytoplasm	transporter
2.494	A_43_P18479	FSIP1	fibrous sheath interacting protein 1	Other	other
2.494	A_44_P370065	NPTX2	neuronal pentraxin 2	Extracellular Space	other
2.492	A_44_P104069	NHP2	NHP2 ribonucleoprotein	Nucleus	other
2.492	A_44_P431150	POLE	DNA polymerase epsilon, catalytic subunit	Nucleus	enzyme
2.492	A_44_P306964	RBMS1	RNA binding motif single stranded interacting protein 1	Nucleus	other
2.491	A_43_P17687	TACC3	transforming acidic coiled-coil containing protein 3	Nucleus	other
2.489	A_44_P640180	ZC2HC1B	zinc finger C2HC-type containing 1B	Other	other
2.488	A_44_P112622	SMARCE1	SWI/SNF related, matrix associated, actin dependent regulator of chromatin, subfamily e, member 1	Nucleus	transcription regulator
2.484	A_42_P479348	HHIPL1	HHIP like 1	Other	other
2.484	A_44_P452222	ITGAL	integrin subunit alpha L	Plasma Membrane	transmembrane receptor
2.481	A_44_P281733	NLRP3	NLR family pyrin domain containing 3	Cytoplasm	other
2.479	A_42_P641234	SNRPA	small nuclear ribonucleoprotein polypeptide A	Nucleus	other
2.478	A_44_P424481	RCC2	regulator of chromosome condensation 2	Nucleus	other
2.478	A_44_P550203	UGGT1	UDP-glucose glycoprotein glucosyltransferase 1	Cytoplasm	enzyme
2.476	A_43_P12926	CYP27B1	cytochrome P450 family 27 subfamily B member 1	Cytoplasm	enzyme
2.472	A_44_P129749	Crabp2/LOC100911902	cellular retinoic acid binding protein 2	Cytoplasm	other
2.471	A_43_P12586	PTGIS	prostaglandin I2 synthase	Cytoplasm	enzyme
2.47	A_44_P194439	DNAJC9	DnaJ heat shock protein family (Hsp40) member C9	Nucleus	other
2.463	A_44_P405655	LOC100912029 (includes others)	similar to DNA segment, Chr 19, Brigham & Womens Genetics 1357 expressed	Cytoplasm	other
2.462	A_44_P299389	ENO1	enolase 1	Cytoplasm	enzyme
2.461	A_42_P810736	TIMELESS	timeless circadian clock	Nucleus	other
2.458	A_44_P473515	POLR1E	RNA polymerase I subunit E	Nucleus	enzyme
2.455	A_44_P242756	PCNA	proliferating cell nuclear antigen	Nucleus	enzyme
2.448	A_43_P20902	DONSON	downstream neighbor of SON	Extracellular Space	other
2.447	A_44_P260072	TBXAS1	thromboxane A synthase 1	Plasma Membrane	enzyme
2.445	A_44_P1021106	LMO4	LIM domain only 4	Nucleus	transcription regulator
2.444	A_44_P209911	NOLC1	nucleolar and coiled-body phosphoprotein 1	Nucleus	transcription regulator
2.439	A_44_P471166	DDX21	DExD-box helicase 21	Nucleus	enzyme
2.439	A_44_P149412	DDX39A	DExD-box helicase 39A	Nucleus	enzyme
2.439	A_44_P428535	OR9I1	olfactory receptor family 9 subfamily I member 1	Plasma Membrane	G-protein coupled receptor
2.439	A_44_P158675	WDR46	WD repeat domain 46	Nucleus	enzyme
2.432	A_43_P22757	SLC16A6	solute carrier family 16 member 6	Plasma Membrane	transporter
2.429	A_44_P269478	PCP2	Purkinje cell protein 2	Cytoplasm	other
2.426	A_42_P766275	SETSIP	SET-like protein	Nucleus	other
2.419	A_44_P561643	GJB3	gap junction protein beta 3	Plasma Membrane	transporter
2.412	A_44_P327890	TFAP2C	transcription factor AP-2 gamma	Nucleus	transcription regulator
2.404	A_44_P438117	RGS1	regulator of G protein signaling 1	Plasma Membrane	other
2.398	A_44_P730837	DSG2	desmoglein 2	Plasma Membrane	other
2.393	A_44_P1041312	FES	FES proto-oncogene, tyrosine kinase	Cytoplasm	kinase
2.39	A_44_P475181	SLA	Src like adaptor	Plasma Membrane	other
2.387	A_44_P379360	FUT7	fucosyltransferase 7	Cytoplasm	enzyme
2.386	A_44_P200507	KHDRBS1	KH RNA binding domain containing, signal transduction associated 1	Nucleus	transcription regulator
2.385	A_44_P426608	WDHD1	WD repeat and HMG-box DNA binding protein 1	Nucleus	other
2.381	A_43_P11580	ABCC2	ATP binding cassette subfamily C member 2	Plasma Membrane	transporter
2.38	A_44_P262517	LOC689412	similar to CG4025-PA	Other	other
2.38	A_44_P531460	TRMT61A	tRNA methyltransferase 61A	Nucleus	enzyme
2.373	A_43_P12806	RAN	RAN, member RAS oncogene family	Nucleus	enzyme
2.372	A_43_P17681	JMJD6	arginine demethylase and lysine hydroxylase	Plasma Membrane	transmembrane receptor
2.371	A_44_P597380	LOC100910286	uncharacterized LOC100910286	Other	other
2.367	A_42_P545721	Snrpe	small nuclear ribonucleoprotein E	Nucleus	other
2.366	A_44_P400158	AURKA	aurora kinase A	Nucleus	kinase
2.364	A_44_P121177	Tpm3	tropomyosin 3	Cytoplasm	other
2.36	A_43_P17109	TOMM40	translocase of outer mitochondrial membrane 40	Cytoplasm	ion channel
2.359	A_44_P331142	TSR1	TSR1, ribosome maturation factor	Nucleus	other
2.346	A_44_P506392	ABCE1	ATP binding cassette subfamily E member 1	Cytoplasm	transporter
2.346	A_44_P183048	CTPS1	CTP synthase 1	Nucleus	enzyme
2.34	A_44_P383555	C17orf53	chromosome 17 open reading frame 53	Other	other
2.337	A_42_P785861	NIPSNAP3A	nipsnap homolog 3A	Nucleus	other
2.334	A_43_P21223	FTSJ3	FtsJ homolog 3	Nucleus	enzyme
2.328	A_44_P990713	RRP9	ribosomal RNA processing 9, small subunit (SSU) processome component, homolog (yeast)	Nucleus	other
2.317	A_44_P123315	GPX1	glutathione peroxidase 1	Cytoplasm	enzyme
2.312	A_44_P849046	RAB32	RAB32, member RAS oncogene family	Cytoplasm	enzyme
2.309	A_44_P1010816	SKA1	spindle and kinetochore associated complex subunit 1	Nucleus	other
2.306	A_43_P17277	GJC2	gap junction protein gamma 2	Plasma Membrane	transporter
2.301	A_44_P496864	SEMA4A	semaphorin 4A	Plasma Membrane	other
2.292	A_42_P552143	CFL1	cofilin 1	Nucleus	other
2.291	A_44_P501843	SHMT2	serine hydroxymethyltransferase 2	Cytoplasm	enzyme
2.289	A_42_P687186	SDC4	syndecan 4	Plasma Membrane	other
2.287	A_43_P19998	Mtap	methylthioadenosine phosphorylase	Cytoplasm	enzyme
2.282	A_43_P23108	MCM7	minichromosome maintenance complex component 7	Nucleus	enzyme
2.282	A_44_P1029770	NOP56	NOP56 ribonucleoprotein	Nucleus	other
2.281	A_42_P669544	CPM	carboxypeptidase M	Plasma Membrane	peptidase
2.279	A_43_P19848	C7orf72	chromosome 7 open reading frame 72	Other	other
2.278	A_44_P489862	TNFAIP8L2	TNF alpha induced protein 8 like 2	Cytoplasm	other
2.276	A_44_P515317	IGFBP4	insulin like growth factor binding protein 4	Extracellular Space	other
2.275	A_44_P483728	RPS6KA1	ribosomal protein S6 kinase A1	Cytoplasm	kinase
2.274	A_44_P680735	AP1S1	adaptor related protein complex 1 sigma 1 subunit	Cytoplasm	transporter
2.272	A_44_P886495	SPRED1	sprouty related EVH1 domain containing 1	Plasma Membrane	other
2.272	A_44_P531770	TOP2A	topoisomerase (DNA) II alpha	Nucleus	enzyme
2.27	A_44_P744519	NPM1	nucleophosmin	Nucleus	transcription regulator
2.266	A_43_P12016	INPP5D	inositol polyphosphate-5-phosphatase D	Cytoplasm	phosphatase
2.262	A_42_P580844	CDK1	cyclin dependent kinase 1	Nucleus	kinase
2.26	A_44_P140314	CDC25C	cell division cycle 25C	Nucleus	phosphatase
2.26	A_44_P420640	NUP43	nucleoporin 43	Nucleus	transporter
2.26	A_42_P586256	Prim1	primase (DNA) subunit 1	Other	other
2.258	A_42_P748981	EMG1	EMG1, N1-specific pseudouridine methyltransferase	Nucleus	enzyme
2.254	A_44_P265911	CNR2	cannabinoid receptor 2	Plasma Membrane	G-protein coupled receptor
2.249	A_44_P1041539	ARHGAP22	Rho GTPase activating protein 22	Cytoplasm	other
2.246	A_44_P956203	SASH3	SAM and SH3 domain containing 3	Cytoplasm	other
2.245	A_44_P463313	PLK1	polo like kinase 1	Nucleus	kinase
2.235	A_44_P182601	LOC103693634	uncharacterized LOC103693634	Other	other
2.228	A_43_P13048	TNFSF11	TNF superfamily member 11	Extracellular Space	cytokine
2.227	A_44_P1056788	SDF2L1	stromal cell derived factor 2 like 1	Cytoplasm	other
2.224	A_43_P16457	CRELD2	cysteine rich with EGF like domains 2	Other	other
2.223	A_44_P417595	DNAI2	dynein axonemal intermediate chain 2	Cytoplasm	other
2.221	A_44_P160888	PPP1R14B	protein phosphatase 1 regulatory inhibitor subunit 14B	Cytoplasm	phosphatase
2.217	A_44_P194806	BAALC	brain and acute leukemia, cytoplasmic	Cytoplasm	other
2.212	A_44_P356047	Hnrnpab	heterogeneous nuclear ribonucleoprotein A/B	Nucleus	other
2.209	A_44_P394228	AMDHD2	amidohydrolase domain containing 2	Nucleus	enzyme
2.207	A_44_P501898	CHTF18	chromosome transmission fidelity factor 18	Nucleus	other
2.207	A_44_P492635	PSMD3	proteasome 26S subunit, non-ATPase 3	Cytoplasm	other
2.206	A_43_P22174	WDR1	WD repeat domain 1	Extracellular Space	other
2.205	A_44_P388755	KIF15	kinesin family member 15	Nucleus	other
2.197	A_44_P288481	HEATR1	HEAT repeat containing 1	Nucleus	other
2.196	A_44_P992516	ARHGAP45	Rho GTPase activating protein 45	Cytoplasm	transporter
2.195	A_44_P410348	NLRC4	NLR family CARD domain containing 4	Cytoplasm	other
2.191	A_44_P744814	Hnrnpa3	heterogeneous nuclear ribonucleoprotein A3	Nucleus	transporter
2.191	A_44_P438922	KLHL6	kelch like family member 6	Other	other
2.191	A_42_P507566	TNFAIP2	TNF alpha induced protein 2	Extracellular Space	other
2.186	A_43_P13117	LCP2	lymphocyte cytosolic protein 2	Cytoplasm	other
2.184	A_43_P12698	LGALS3	galectin 3	Extracellular Space	other
2.181	A_44_P318435	CCT5	chaperonin containing TCP1 subunit 5	Cytoplasm	other
2.179	A_44_P535742	HSPD1	heat shock protein family D (Hsp60) member 1	Cytoplasm	enzyme
2.179	A_44_P517686	TOMM70	translocase of outer mitochondrial membrane 70	Cytoplasm	transporter
2.176	A_44_P506980	KCNK13	potassium two pore domain channel subfamily K member 13	Plasma Membrane	ion channel
2.175	A_44_P114331	ABL2	ABL proto-oncogene 2, non-receptor tyrosine kinase	Cytoplasm	kinase
2.174	A_44_P532237	FANCA	Fanconi anemia complementation group A	Nucleus	other
2.169	A_42_P525886	CRABP1	cellular retinoic acid binding protein 1	Cytoplasm	transporter
2.162	A_44_P517012	RAC2	ras-related C3 botulinum toxin substrate 2 (rho family, small GTP binding protein Rac2)	Cytoplasm	enzyme
2.159	A_44_P297428	NCAPG	non-SMC condensin I complex subunit G	Nucleus	other
2.148	A_44_P514939	TSPO	translocator protein	Cytoplasm	transmembrane receptor
2.144	A_42_P678430	CARD9	caspase recruitment domain family member 9	Cytoplasm	other
2.138	A_42_P588041	EIF5A	eukaryotic translation initiation factor 5A	Cytoplasm	translation regulator
2.136	A_44_P541623	TRABD	TraB domain containing	Extracellular Space	other
2.135	A_44_P213149	MASTL	microtubule associated serine/threonine kinase like	Cytoplasm	kinase
2.134	A_42_P598934	Lrrfip1	LRR binding FLII interacting protein 1	Other	other
2.129	A_44_P257582	CSF1R	colony stimulating factor 1 receptor	Plasma Membrane	kinase
2.124	A_43_P23040	Pqlc2	PQ loop repeat containing 2	Cytoplasm	transporter
2.119	A_44_P538658	SLC7A7	solute carrier family 7 member 7	Plasma Membrane	transporter
2.118	A_44_P473159	CENPI	centromere protein I	Nucleus	other
2.114	A_44_P995681	MELK	maternal embryonic leucine zipper kinase	Cytoplasm	kinase
2.113	A_44_P372839	CENPE	centromere protein E	Nucleus	other
2.111	A_44_P248506	IFNE	interferon epsilon	Extracellular Space	cytokine
2.111	A_43_P23023	PPP1R18	protein phosphatase 1 regulatory subunit 18	Other	other
2.111	A_44_P426498	RGD1564617	similar to large subunit ribosomal protein L36a	Other	other
2.11	A_43_P11370	PLP2	proteolipid protein 2	Cytoplasm	transporter
2.105	A_42_P686234	Muc4	mucin 4	Plasma Membrane	other
2.102	A_44_P438822	SPATS2	spermatogenesis associated serine rich 2	Cytoplasm	other
2.1	A_44_P1032732	B4GALT6	beta-1,4-galactosyltransferase 6	Cytoplasm	enzyme
2.1	A_44_P835675	MSN	moesin	Plasma Membrane	other
2.099	A_44_P105991	CNN2	calponin 2	Cytoplasm	other
2.099	A_44_P555399	FIGNL1	fidgetin like 1	Nucleus	enzyme
2.098	A_44_P558048	NOC2L	NOC2 like nucleolar associated transcriptional repressor	Nucleus	transcription regulator
2.095	A_44_P160877	CFH	complement factor H	Extracellular Space	other
2.095	A_44_P309266	PBK	PDZ binding kinase	Cytoplasm	kinase
2.094	A_44_P180795	SPDL1	spindle apparatus coiled-coil protein 1	Nucleus	other
2.093	A_42_P772136	FAM60A	family with sequence similarity 60 member A	Extracellular Space	other
2.093	A_44_P250281	HIP1	huntingtin interacting protein 1	Cytoplasm	other
2.093	A_44_P328872	RANBP1	RAN binding protein 1	Nucleus	other
2.091	A_44_P250368	TK1	thymidine kinase 1	Cytoplasm	kinase
2.09	A_44_P226771	MAPK8IP3	mitogen-activated protein kinase 8 interacting protein 3	Cytoplasm	other
2.084	A_43_P18742	RPF2	ribosome production factor 2 homolog	Nucleus	other
2.083	A_44_P239122	PPM1G	protein phosphatase, Mg2+/Mn2+ dependent 1G	Nucleus	phosphatase
2.079	A_44_P416761	LMNA	lamin A/C	Nucleus	other
2.076	A_44_P215302	UBE2T	ubiquitin conjugating enzyme E2 T	Nucleus	enzyme
2.071	A_44_P175240	CYP7B1	cytochrome P450 family 7 subfamily B member 1	Cytoplasm	enzyme
2.064	A_42_P752134	KPNA2	karyopherin subunit alpha 2	Nucleus	transporter
2.063	A_42_P653673	SNRPD1	small nuclear ribonucleoprotein D1 polypeptide	Nucleus	other
2.058	A_44_P438193	AP2A2	adaptor related protein complex 2 alpha 2 subunit	Cytoplasm	transporter
2.058	A_44_P412647	GINS2	GINS complex subunit 2	Nucleus	other
2.052	A_44_P465931	CLIC1	chloride intracellular channel 1	Nucleus	ion channel
2.051	A_44_P366648	STIL	SCL/TAL1 interrupting locus	Nucleus	other
2.045	A_44_P455145	PLXNB2	plexin B2	Plasma Membrane	transmembrane receptor
2.044	A_42_P814235	P2RY6	pyrimidinergic receptor P2Y6	Plasma Membrane	G-protein coupled receptor
2.043	A_44_P554454	TXNRD1	thioredoxin reductase 1	Cytoplasm	enzyme
2.041	A_44_P397657	APOC4	apolipoprotein C4	Extracellular Space	transporter
2.039	A_44_P227604	EME1	essential meiotic structure-specific endonuclease 1	Nucleus	enzyme
2.039	A_44_P499287	ORC6	origin recognition complex subunit 6	Nucleus	other
2.036	A_44_P166495	RANGAP1	Ran GTPase activating protein 1	Nucleus	other
2.032	A_43_P13069	CHEK1	checkpoint kinase 1	Nucleus	kinase
2.032	A_44_P501277	NECTIN1	nectin cell adhesion molecule 1	Plasma Membrane	other
2.031	A_43_P12413	CYBA	cytochrome b-245 alpha chain	Cytoplasm	enzyme
2.026	A_44_P135094	Art2b	ADP-ribosyltransferase 2b	Plasma Membrane	enzyme
2.026	A_43_P22979	TYRP1	tyrosinase related protein 1	Cytoplasm	enzyme
2.018	A_44_P544113	ILDR1	immunoglobulin like domain containing receptor 1	Plasma Membrane	transmembrane receptor
2.018	A_43_P13337	STIP1	stress induced phosphoprotein 1	Cytoplasm	other
2.015	A_44_P530813	CASP3	caspase 3	Cytoplasm	peptidase
2.013	A_44_P269630	AK6	adenylate kinase 6	Nucleus	kinase
2.013	A_44_P497467	Dock4	dedicator of cytokinesis 4	Extracellular Space	other
2.008	A_44_P990937	SMARCA4	SWI/SNF related, matrix associated, actin dependent regulator of chromatin, subfamily a, member 4	Nucleus	transcription regulator
2.007	A_44_P100913	ZWILCH	zwilch kinetochore protein	Nucleus	other
2.006	A_44_P148161	RRM1	ribonucleotide reductase catalytic subunit M1	Nucleus	enzyme
2.005	A_44_P248133	TAGLN2	transgelin 2	Cytoplasm	other
2.004	A_43_P10981	MRPS18B	mitochondrial ribosomal protein S18B	Cytoplasm	other
-2.001	A_44_P432452	AKR1B1	aldo-keto reductase family 1 member B	Cytoplasm	enzyme
-2.001	A_44_P996557	PTPDC1	protein tyrosine phosphatase domain containing 1	Extracellular Space	phosphatase
-2.004	A_43_P18918	ACBD5	acyl-CoA binding domain containing 5	Nucleus	other
-2.005	A_44_P464942	ZBTB20	zinc finger and BTB domain containing 20	Nucleus	transcription regulator
-2.006	A_44_P128974	GATAD1	GATA zinc finger domain containing 1	Nucleus	other
-2.007	A_44_P669577	FREM1	FRAS1 related extracellular matrix 1	Extracellular Space	other
-2.008	A_42_P715210	Abcg3	ATP-binding cassette, sub-family G (WHITE), member 3	Plasma Membrane	transporter
-2.014	A_44_P278408	CHRDL1	chordin like 1	Extracellular Space	other
-2.014	A_44_P424148	GLDC	glycine decarboxylase	Cytoplasm	enzyme
-2.015	A_44_P291028	ARHGEF19	Rho guanine nucleotide exchange factor 19	Cytoplasm	other
-2.017	A_43_P11676	TFF3	trefoil factor 3	Extracellular Space	other
-2.023	A_42_P787160	Ptprv	protein tyrosine phosphatase, receptor type, V	Other	other
-2.025	A_44_P1040966	LRRC24	leucine rich repeat containing 24	Other	other
-2.026	A_44_P711487	ARG2	arginase 2	Cytoplasm	enzyme
-2.027	A_44_P291157	FAM126B	family with sequence similarity 126 member B	Other	other
-2.027	A_44_P697832	FAM228B	family with sequence similarity 228 member B	Other	other
-2.027	A_44_P563755	NAALAD2	N-acetylated alpha-linked acidic dipeptidase 2	Plasma Membrane	peptidase
-2.028	A_44_P201077	ASRGL1	asparaginase like 1	Cytoplasm	enzyme
-2.029	A_44_P1057412	DDX25	DEAD-box helicase 25	Nucleus	enzyme
-2.029	A_44_P777795	LOC102552773	uncharacterized LOC102552773	Other	other
-2.029	A_44_P156949	RTKN2	rhotekin 2	Plasma Membrane	other
-2.032	A_44_P168430	ATP8A1	ATPase phospholipid transporting 8A1	Cytoplasm	transporter
-2.032	A_44_P710192	TMEM45B	transmembrane protein 45B	Extracellular Space	other
-2.034	A_44_P478949	C1QTNF1	C1q and TNF related 1	Extracellular Space	other
-2.036	A_44_P428437	MIA	melanoma inhibitory activity	Extracellular Space	other
-2.036	A_44_P976960	PDZD3	PDZ domain containing 3	Plasma Membrane	transporter
-2.038	A_42_P830311	MRAP	melanocortin 2 receptor accessory protein	Cytoplasm	other
-2.041	A_43_P15416	FAT3	FAT atypical cadherin 3	Plasma Membrane	other
-2.043	A_44_P470430	FAP	fibroblast activation protein alpha	Cytoplasm	peptidase
-2.045	A_43_P12085	Dbil5	diazepam binding inhibitor-like 5	Cytoplasm	other
-2.046	A_43_P12200	SLC26A1	solute carrier family 26 member 1	Plasma Membrane	transporter
-2.047	A_42_P453976	Ifitm6	interferon induced transmembrane protein 6	Other	other
-2.054	A_44_P344228	HLA-DOA	major histocompatibility complex, class II, DO alpha	Plasma Membrane	transmembrane receptor
-2.055	A_44_P989546	MAP3K13	mitogen-activated protein kinase kinase kinase 13	Cytoplasm	kinase
-2.056	A_44_P461025	TET1	tet methylcytosine dioxygenase 1	Nucleus	enzyme
-2.059	A_44_P760599	TC2N	tandem C2 domains, nuclear	Nucleus	transporter
-2.062	A_42_P666809	SSBP2	single stranded DNA binding protein 2	Nucleus	transcription regulator
-2.067	A_44_P184011	HLA-DRB5	major histocompatibility complex, class II, DR beta 5	Plasma Membrane	transmembrane receptor
-2.067	A_43_P11481	ME1	malic enzyme 1	Cytoplasm	enzyme
-2.071	A_44_P484474	LSMEM2	leucine rich single-pass membrane protein 2	Other	other
-2.073	A_44_P621013	OLFML1	olfactomedin like 1	Extracellular Space	other
-2.073	A_43_P11343	SMIM1	small integral membrane protein 1 (Vel blood group)	Cytoplasm	other
-2.074	A_44_P886671	C3orf20	chromosome 3 open reading frame 20	Cytoplasm	other
-2.074	A_43_P13468	HSPA4L	heat shock protein family A (Hsp70) member 4 like	Cytoplasm	other
-2.075	A_44_P484332	HSPA12A	heat shock protein family A (Hsp70) member 12A	Cytoplasm	other
-2.079	A_43_P12552	OCLN	occludin	Plasma Membrane	other
-2.081	A_43_P23446	CA6	carbonic anhydrase 6	Extracellular Space	enzyme
-2.081	A_44_P175703	MGC114492/RGD1559726	similar to melanoma antigen family A, 6	Other	other
-2.081	A_42_P529711	NKD1	naked cuticle homolog 1	Other	other
-2.082	A_44_P183160	HOXC11	homeobox C11	Nucleus	transcription regulator
-2.084	A_44_P190200	CHD3	chromodomain helicase DNA binding protein 3	Nucleus	enzyme
-2.084	A_44_P668293	CPEB3	cytoplasmic polyadenylation element binding protein 3	Cytoplasm	translation regulator
-2.086	A_43_P14633	Zfp651	zinc finger protein 651	Other	other
-2.087	A_42_P665879	ATF5	activating transcription factor 5	Nucleus	transcription regulator
-2.088	A_44_P526978	BMP3	bone morphogenetic protein 3	Extracellular Space	growth factor
-2.088	A_44_P354244	FRRS1L	ferric chelate reductase 1 like	Cytoplasm	transporter
-2.091	A_44_P322608	FIS1	fission, mitochondrial 1	Cytoplasm	other
-2.091	A_43_P15496	MS4A2	membrane spanning 4-domains A2	Plasma Membrane	transmembrane receptor
-2.092	A_44_P262274	LOC103689922	homeobox protein Hox-A5	Other	other
-2.096	A_44_P345319	CHRD	chordin	Extracellular Space	other
-2.096	A_44_P899938	FAM124A	family with sequence similarity 124 member A	Other	other
-2.098	A_43_P10257	VKORC1	vitamin K epoxide reductase complex subunit 1	Cytoplasm	enzyme
-2.099	A_44_P343393	FXYD3	FXYD domain containing ion transport regulator 3	Plasma Membrane	other
-2.1	A_44_P1052607	AOX1	aldehyde oxidase 1	Cytoplasm	enzyme
-2.101	A_43_P17382	CARMIL1	capping protein regulator and myosin 1 linker 1	Cytoplasm	enzyme
-2.103	A_43_P20743	ELMO1	engulfment and cell motility 1	Cytoplasm	other
-2.103	A_44_P540099	NUCB1	nucleobindin 1	Cytoplasm	other
-2.104	A_44_P748419	KDM4B	lysine demethylase 4B	Nucleus	enzyme
-2.107	A_44_P351181	Nat8b	N-acetyltransferase 8B	Cytoplasm	enzyme
-2.11	A_44_P339722	CDH11	cadherin 11	Plasma Membrane	other
-2.11	A_44_P777181	RAB22A	RAB22A, member RAS oncogene family	Cytoplasm	enzyme
-2.113	A_44_P486403	EGFR	epidermal growth factor receptor	Plasma Membrane	kinase
-2.113	A_43_P20053	FUT8	fucosyltransferase 8	Cytoplasm	enzyme
-2.115	A_44_P843693	MTURN	maturin, neural progenitor differentiation regulator homolog	Other	other
-2.117	A_44_P415115	TSPAN13	tetraspanin 13	Plasma Membrane	other
-2.118	A_44_P306932	GIPC2	GIPC PDZ domain containing family member 2	Cytoplasm	other
-2.12	A_44_P797125	ZNF106	zinc finger protein 106	Cytoplasm	other
-2.13	A_44_P310168	TGFA	transforming growth factor alpha	Extracellular Space	growth factor
-2.132	A_42_P478101	EPHX4	epoxide hydrolase 4	Other	enzyme
-2.135	A_44_P285463	CLDN1	claudin 1	Plasma Membrane	other
-2.139	A_44_P537480	COX6B2	cytochrome c oxidase subunit 6B2	Cytoplasm	enzyme
-2.141	A_44_P240129	CAV1	caveolin 1	Plasma Membrane	transmembrane receptor
-2.147	A_44_P427814	Igh-6	immunoglobulin heavy chain 6	Other	other
-2.148	A_44_P971207	NUDT11	nudix hydrolase 11	Cytoplasm	phosphatase
-2.15	A_44_P199211	PLCB1	phospholipase C beta 1	Cytoplasm	enzyme
-2.157	A_44_P302697	ARHGAP31	Rho GTPase activating protein 31	Cytoplasm	other
-2.157	A_44_P177434	GPM6A	glycoprotein M6A	Plasma Membrane	ion channel
-2.163	A_44_P241448	Arxes1/Arxes2	adipocyte-related X-chromosome expressed sequence 2	Cytoplasm	other
-2.167	A_44_P605884	SPATA31D1 (includes others)	SPATA31 subfamily D member 1	Other	other
-2.17	A_44_P487123	SLC25A27	solute carrier family 25 member 27	Cytoplasm	transporter
-2.171	A_44_P203797	Nr1h5	nuclear receptor subfamily 1, group H, member 5	Other	other
-2.173	A_43_P16050	WNT11	Wnt family member 11	Extracellular Space	other
-2.176	A_43_P13828	TCF4	transcription factor 4	Nucleus	transcription regulator
-2.178	A_44_P555261	ALDH6A1	aldehyde dehydrogenase 6 family member A1	Cytoplasm	enzyme
-2.179	A_44_P638511	PAQR5	progestin and adipoQ receptor family member 5	Other	other
-2.179	A_44_P977318	TFCP2L1	transcription factor CP2 like 1	Nucleus	transcription regulator
-2.181	A_44_P914022	SYCE3	synaptonemal complex central element protein 3	Nucleus	other
-2.181	A_44_P803941	VSTM4	V-set and transmembrane domain containing 4	Other	other
-2.182	A_44_P593830	IL12RB1	interleukin 12 receptor subunit beta 1	Plasma Membrane	transmembrane receptor
-2.187	A_44_P105899	AIF1L	allograft inflammatory factor 1 like	Plasma Membrane	other
-2.192	A_44_P163408	SLC12A2	solute carrier family 12 member 2	Plasma Membrane	transporter
-2.193	A_44_P637687	KIAA1549L	KIAA1549 like	Cytoplasm	other
-2.196	A_44_P267228	HSD17B13	hydroxysteroid 17-beta dehydrogenase 13	Extracellular Space	enzyme
-2.196	A_44_P1015804	RSPH9	radial spoke head 9 homolog	Other	other
-2.198	A_43_P12184	GPR85	G protein-coupled receptor 85	Plasma Membrane	G-protein coupled receptor
-2.203	A_43_P14910	DDC	dopa decarboxylase	Cytoplasm	enzyme
-2.212	A_44_P520349	BRDT	bromodomain testis associated	Nucleus	kinase
-2.216	A_44_P530253	ADAM23	ADAM metallopeptidase domain 23	Plasma Membrane	peptidase
-2.219	A_43_P22401	Lrrc51	leucine rich repeat containing 51	Other	other
-2.22	A_43_P17213	ABHD1	abhydrolase domain containing 1	Other	other
-2.22	A_44_P669616	DACT1	dishevelled binding antagonist of beta catenin 1	Cytoplasm	other
-2.229	A_44_P1013163	CLYBL	citrate lyase beta like	Cytoplasm	enzyme
-2.229	A_44_P423566	TRIL	TLR4 interactor with leucine rich repeats	Other	other
-2.23	A_44_P672312	NCAM1	neural cell adhesion molecule 1	Plasma Membrane	other
-2.237	A_44_P436195	C6orf52	chromosome 6 open reading frame 52	Other	other
-2.238	A_44_P654145	ZNF365	zinc finger protein 365	Cytoplasm	other
-2.244	A_44_P1020105	AFF4	AF4/FMR2 family member 4	Nucleus	transcription regulator
-2.248	A_42_P475623	KLF5	Kruppel like factor 5	Nucleus	transcription regulator
-2.251	A_42_P466362	ADCY8	adenylate cyclase 8	Plasma Membrane	enzyme
-2.252	A_44_P403532	GARNL3	GTPase activating Rap/RanGAP domain like 3	Other	other
-2.253	A_44_P484011	C21orf2	chromosome 21 open reading frame 2	Cytoplasm	other
-2.257	A_43_P12275	NAT8	N-acetyltransferase 8 (putative)	Nucleus	transcription regulator
-2.261	A_44_P178576	CNKSR2	connector enhancer of kinase suppressor of Ras 2	Plasma Membrane	other
-2.265	A_42_P529780	SPDYA	speedy/RINGO cell cycle regulator family member A	Nucleus	other
-2.266	A_44_P1000722	FILIP1	filamin A interacting protein 1	Cytoplasm	other
-2.267	A_44_P235978	FASN	fatty acid synthase	Cytoplasm	enzyme
-2.268	A_44_P578505	LOC100364027	hexokinase 1-like	Cytoplasm	other
-2.269	A_44_P949804	LGR6	leucine rich repeat containing G protein-coupled receptor 6	Plasma Membrane	G-protein coupled receptor
-2.272	A_43_P14045	SEMA4G	semaphorin 4G	Plasma Membrane	other
-2.277	A_44_P392611	NFATC2	nuclear factor of activated T-cells 2	Nucleus	transcription regulator
-2.279	A_44_P409425	BBOF1	basal body orientation factor 1	Cytoplasm	other
-2.281	A_44_P347420	USP43	ubiquitin specific peptidase 43	Nucleus	peptidase
-2.282	A_44_P900672	ROBO2	roundabout guidance receptor 2	Plasma Membrane	transmembrane receptor
-2.283	A_44_P475919	ADAMTS14	ADAM metallopeptidase with thrombospondin type 1 motif 14	Extracellular Space	peptidase
-2.284	A_44_P389283	ASH1L	ASH1 like histone lysine methyltransferase	Nucleus	transcription regulator
-2.286	A_44_P679072	LOC100910973	uncharacterized LOC100910973	Other	other
-2.286	A_43_P19155	PATJ	PATJ, crumbs cell polarity complex component	Plasma Membrane	other
-2.289	A_43_P15261	NR3C2	nuclear receptor subfamily 3 group C member 2	Nucleus	ligand-dependent nuclear receptor
-2.293	A_44_P189406	SPINT1	serine peptidase inhibitor, Kunitz type 1	Extracellular Space	other
-2.298	A_44_P325698	MEGF10	multiple EGF like domains 10	Plasma Membrane	transmembrane receptor
-2.301	A_44_P223870	RHOT1	ras homolog family member T1	Cytoplasm	enzyme
-2.307	A_44_P273783	ALDH1A3	aldehyde dehydrogenase 1 family member A3	Cytoplasm	enzyme
-2.308	A_44_P398193	CGREF1	cell growth regulator with EF-hand domain 1	Extracellular Space	other
-2.311	A_42_P832417	VSNL1	visinin like 1	Cytoplasm	other
-2.313	A_43_P16740	OGN	osteoglycin	Extracellular Space	growth factor
-2.316	A_42_P646290	GNAZ	G protein subunit alpha z	Plasma Membrane	enzyme
-2.317	A_44_P407740	C2CD4D	C2 calcium dependent domain containing 4D	Other	other
-2.317	A_43_P10290	TSPAN1	tetraspanin 1	Cytoplasm	other
-2.318	A_43_P10269	ITM2A	integral membrane protein 2A	Plasma Membrane	other
-2.318	A_42_P475233	TEKT2	tektin 2	Cytoplasm	other
-2.326	A_43_P12193	Fbxl20	F-box and leucine-rich repeat protein 20	Cytoplasm	enzyme
-2.327	A_44_P618099	ARVCF	armadillo repeat gene deleted in velocardiofacial syndrome	Plasma Membrane	other
-2.336	A_44_P871389	SSPN	sarcospan	Plasma Membrane	other
-2.338	A_44_P538165	TSPAN17	tetraspanin 17	Other	enzyme
-2.339	A_43_P19999	Fcrls	Fc receptor-like S, scavenger receptor	Plasma Membrane	other
-2.34	A_44_P299887	OLFML2A	olfactomedin like 2A	Extracellular Space	other
-2.341	A_44_P793922	CACNA1A	calcium voltage-gated channel subunit alpha1 A	Plasma Membrane	ion channel
-2.349	A_44_P441434	CAV2	caveolin 2	Plasma Membrane	other
-2.357	A_44_P233963	MRAS	muscle RAS oncogene homolog	Plasma Membrane	enzyme
-2.365	A_44_P776390	KCNK5	potassium two pore domain channel subfamily K member 5	Plasma Membrane	ion channel
-2.373	A_43_P15613	NRTN	neurturin	Extracellular Space	growth factor
-2.378	A_44_P1037285	SLC44A4	solute carrier family 44 member 4	Plasma Membrane	transporter
-2.381	A_44_P687109	ARHGEF37	Rho guanine nucleotide exchange factor 37	Other	other
-2.386	A_44_P549075	PLA2G5	phospholipase A2 group V	Extracellular Space	enzyme
-2.387	A_43_P18186	PDZRN3	PDZ domain containing ring finger 3	Extracellular Space	enzyme
-2.394	A_43_P12162	PPP2R2B	protein phosphatase 2 regulatory subunit Bbeta	Cytoplasm	phosphatase
-2.394	A_44_P335002	TRB	T-cell receptor beta locus	Plasma Membrane	transmembrane receptor
-2.398	A_43_P11435	Apoc3	apolipoprotein C-III	Extracellular Space	transporter
-2.398	A_44_P131694	PHKB	phosphorylase kinase regulatory subunit beta	Cytoplasm	kinase
-2.4	A_42_P699217	SOX2	SRY-box 2	Nucleus	transcription regulator
-2.401	A_44_P465424	ADGRF5	adhesion G protein-coupled receptor F5	Plasma Membrane	G-protein coupled receptor
-2.401	A_44_P505145	LPL	lipoprotein lipase	Cytoplasm	enzyme
-2.402	A_44_P781948	Coch	cochlin	Cytoplasm	other
-2.409	A_44_P762095	IGIP	IgA inducing protein	Other	other
-2.421	A_44_P346832	TESC	tescalcin	Cytoplasm	other
-2.427	A_44_P1071620	MMP27	matrix metallopeptidase 27	Cytoplasm	peptidase
-2.431	A_42_P726223	ADCYAP1R1	ADCYAP receptor type I	Plasma Membrane	G-protein coupled receptor
-2.438	A_44_P123119	PLBD2	phospholipase B domain containing 2	Extracellular Space	other
-2.439	A_44_P637872	NXPE1	neurexophilin and PC-esterase domain family member 1	Other	other
-2.441	A_44_P214326	CACNB3	calcium voltage-gated channel auxiliary subunit beta 3	Plasma Membrane	ion channel
-2.441	A_43_P21508	EML5	echinoderm microtubule associated protein like 5	Cytoplasm	other
-2.443	A_44_P367481	P2RX6	purinergic receptor P2X 6	Plasma Membrane	ion channel
-2.445	A_44_P260475	HDAC11	histone deacetylase 11	Nucleus	transcription regulator
-2.451	A_44_P424188	PLCXD3	phosphatidylinositol specific phospholipase C X domain containing 3	Other	other
-2.455	A_42_P624773	CPZ	carboxypeptidase Z	Extracellular Space	peptidase
-2.455	A_44_P370838	RFTN2	raftlin family member 2	Other	other
-2.455	A_44_P912124	STRBP	spermatid perinuclear RNA binding protein	Cytoplasm	other
-2.461	A_44_P408139	VMO1	vitelline membrane outer layer 1 homolog	Extracellular Space	other
-2.463	A_44_P215689	LOC100912852	disks large homolog 5-like	Other	other
-2.464	A_44_P499171	Mtmr7	myotubularin related protein 7	Cytoplasm	other
-2.464	A_42_P538400	NTRK2	neurotrophic receptor tyrosine kinase 2	Plasma Membrane	kinase
-2.469	A_44_P426529	ME3	malic enzyme 3	Cytoplasm	enzyme
-2.474	A_44_P376994	LSAMP	limbic system-associated membrane protein	Plasma Membrane	other
-2.477	A_44_P132081	IBSP	integrin binding sialoprotein	Extracellular Space	other
-2.48	A_44_P240881	ART3	ADP-ribosyltransferase 3	Plasma Membrane	enzyme
-2.488	A_44_P369189	RAMP2	receptor activity modifying protein 2	Plasma Membrane	transporter
-2.493	A_43_P10568	LOC103691479	uncharacterized LOC103691479	Other	other
-2.498	A_44_P685554	DCDC2	doublecortin domain containing 2	Extracellular Space	other
-2.502	A_44_P442780	KCNAB1	potassium voltage-gated channel subfamily A member regulatory beta subunit 1	Plasma Membrane	ion channel
-2.504	A_44_P535496	TCF7L2	transcription factor 7 like 2	Nucleus	transcription regulator
-2.511	A_44_P1010087	HOXA2	homeobox A2	Nucleus	transcription regulator
-2.514	A_43_P21367	HECW2	HECT, C2 and WW domain containing E3 ubiquitin protein ligase 2	Extracellular Space	enzyme
-2.519	A_44_P1002317	TBATA	thymus, brain and testes associated	Cytoplasm	other
-2.539	A_44_P312755	MFAP5	microfibrillar associated protein 5	Extracellular Space	other
-2.553	A_44_P240696	NPPC	natriuretic peptide C	Extracellular Space	other
-2.556	A_44_P227221	SYDE2	synapse defective Rho GTPase homolog 2	Cytoplasm	other
-2.557	A_42_P636761	GZMM	granzyme M	Cytoplasm	peptidase
-2.56	A_44_P883396	CPED1	cadherin like and PC-esterase domain containing 1	Cytoplasm	other
-2.564	A_44_P1051981	EVPL	envoplakin	Plasma Membrane	other
-2.568	A_44_P808769	CLCN4	chloride voltage-gated channel 4	Plasma Membrane	ion channel
-2.573	A_43_P13847	UBE2K	ubiquitin conjugating enzyme E2 K	Cytoplasm	transcription regulator
-2.575	A_44_P202424	Rapgef5	Rap guanine nucleotide exchange factor 5	Nucleus	other
-2.59	A_44_P361161	LYPD6B	LY6/PLAUR domain containing 6B	Other	other
-2.593	A_44_P424552	PLSCR4	phospholipid scramblase 4	Plasma Membrane	enzyme
-2.595	A_44_P277820	CD74	CD74 molecule	Plasma Membrane	transmembrane receptor
-2.596	A_44_P395708	Apeg3	antisense paternally expressed gene 3	Other	other
-2.597	A_44_P962754	RDH12	retinol dehydrogenase 12 (all-trans/9-cis/11-cis)	Cytoplasm	enzyme
-2.599	A_44_P215157	LIN7B	lin-7 homolog B, crumbs cell polarity complex component	Cytoplasm	other
-2.601	A_44_P349209	LOC100363914 (includes others)	similar to DC-SIGN	Other	other
-2.605	A_44_P858851	PRSS35	protease, serine 35	Extracellular Space	peptidase
-2.622	A_44_P101460	PCDH7	protocadherin 7	Plasma Membrane	other
-2.632	A_43_P15464	CAPN8	calpain 8	Cytoplasm	peptidase
-2.635	A_42_P602822	RET	ret proto-oncogene	Plasma Membrane	kinase
-2.638	A_44_P287564	EBP	emopamil binding protein (sterol isomerase)	Cytoplasm	enzyme
-2.644	A_44_P212267	PKIA	cAMP-dependent protein kinase inhibitor alpha	Cytoplasm	other
-2.649	A_44_P385688	RAB40B	RAB40B, member RAS oncogene family	Plasma Membrane	enzyme
-2.649	A_44_P374733	TRHR	thyrotropin releasing hormone receptor	Plasma Membrane	G-protein coupled receptor
-2.662	A_44_P292010	NDRG2	NDRG family member 2	Cytoplasm	other
-2.669	A_42_P676630	GPLD1	glycosylphosphatidylinositol specific phospholipase D1	Cytoplasm	enzyme
-2.669	A_44_P355123	GUCY1A3	guanylate cyclase 1 soluble subunit alpha	Cytoplasm	enzyme
-2.68	A_42_P502271	FAM81A	family with sequence similarity 81 member A	Other	other
-2.68	A_44_P213174	PAMR1	peptidase domain containing associated with muscle regeneration 1	Extracellular Space	peptidase
-2.695	A_44_P191822	Nat8f5	N-acetyltransferase 8 (GCN5-related) family member 5	Other	enzyme
-2.696	A_43_P15978	FGF4	fibroblast growth factor 4	Extracellular Space	growth factor
-2.702	A_44_P207648	NTM	neurotrimin	Plasma Membrane	other
-2.708	A_43_P18361	CD7	CD7 molecule	Plasma Membrane	other
-2.713	A_44_P232158	GLT8D2	glycosyltransferase 8 domain containing 2	Other	enzyme
-2.721	A_44_P855100	MMP16	matrix metallopeptidase 16	Extracellular Space	peptidase
-2.722	A_44_P309013	MAPT	microtubule associated protein tau	Plasma Membrane	other
-2.727	A_44_P511034	VEPH1	ventricular zone expressed PH domain containing 1	Nucleus	other
-2.731	A_44_P541640	LOC100910579/RGD1566137	similar to ribosomal protein L10a	Other	other
-2.732	A_44_P480858	RGS22	regulator of G protein signaling 22	Cytoplasm	other
-2.733	A_43_P12433	GRID2	glutamate ionotropic receptor delta type subunit 2	Plasma Membrane	ion channel
-2.74	A_44_P501536	ARMC4	armadillo repeat containing 4	Extracellular Space	other
-2.745	A_44_P638638	RFLNA	refilin A	Other	transporter
-2.746	A_44_P578044	GREB1L	growth regulation by estrogen in breast cancer 1 like	Extracellular Space	other
-2.746	A_44_P324554	NDNF	neuron derived neurotrophic factor	Extracellular Space	other
-2.747	A_43_P11724	GCKR	glucokinase regulator	Nucleus	other
-2.751	A_44_P428691	ELOVL6	ELOVL fatty acid elongase 6	Cytoplasm	enzyme
-2.77	A_42_P737912	FAM180A	family with sequence similarity 180 member A	Other	other
-2.775	A_43_P17925	ABCA8	ATP binding cassette subfamily A member 8	Plasma Membrane	transporter
-2.776	A_44_P455501	SLC25A23	solute carrier family 25 member 23	Cytoplasm	transporter
-2.78	A_43_P12465	NRP2	neuropilin 2	Plasma Membrane	kinase
-2.781	A_44_P433882	CRISPLD1	cysteine rich secretory protein LCCL domain containing 1	Cytoplasm	other
-2.788	A_43_P12855	OLFM1	olfactomedin 1	Cytoplasm	other
-2.789	A_44_P756922	GLYCTK	glycerate kinase	Cytoplasm	kinase
-2.817	A_42_P541962	C1QTNF4	C1q and TNF related 4	Extracellular Space	other
-2.829	A_42_P633709	PLK5	polo like kinase 5	Cytoplasm	other
-2.837	A_43_P19094	ELOVL7	ELOVL fatty acid elongase 7	Cytoplasm	enzyme
-2.85	A_44_P310689	CAMK2B	calcium/calmodulin dependent protein kinase II beta	Cytoplasm	kinase
-2.859	A_44_P449938	KCNJ13	potassium voltage-gated channel subfamily J member 13	Plasma Membrane	ion channel
-2.869	A_44_P560021	B3GALT2	beta-1,3-galactosyltransferase 2	Cytoplasm	enzyme
-2.875	A_44_P233011	FIBIN	fin bud initiation factor homolog (zebrafish)	Cytoplasm	other
-2.878	A_43_P11116	Prss30	protease, serine 30	Plasma Membrane	peptidase
-2.881	A_44_P243295	LOC100912723	CD209 antigen-like protein A-like	Other	other
-2.911	A_44_P406099	CAVIN2	caveolae associated protein 2	Plasma Membrane	other
-2.925	A_44_P198804	NRXN2	neurexin 2	Plasma Membrane	transporter
-2.944	A_44_P154793	IQCG	IQ motif containing G	Cytoplasm	other
-2.945	A_42_P464378	ITIH3	inter-alpha-trypsin inhibitor heavy chain 3	Extracellular Space	other
-2.947	A_42_P578386	TSSK2	testis specific serine kinase 2	Cytoplasm	kinase
-2.969	A_44_P727508	RAB11FIP4	RAB11 family interacting protein 4	Cytoplasm	other
-2.973	A_44_P810115	Peg3	paternally expressed 3	Nucleus	other
-2.979	A_44_P624624	ESYT3	extended synaptotagmin 3	Plasma Membrane	other
-2.989	A_42_P614175	GAL	galanin and GMAP prepropeptide	Extracellular Space	other
-3.032	A_44_P308925	ABAT	4-aminobutyrate aminotransferase	Cytoplasm	enzyme
-3.069	A_44_P883087	RGS13	regulator of G protein signaling 13	Nucleus	other
-3.097	A_44_P496447	NTF3	neurotrophin 3	Extracellular Space	growth factor
-3.099	A_44_P1017996	WDR17	WD repeat domain 17	Other	other
-3.101	A_44_P126938	Csap1	common salivary protein 1	Extracellular Space	other
-3.132	A_44_P166161	ADH7	alcohol dehydrogenase 7 (class IV), mu or sigma polypeptide	Cytoplasm	enzyme
-3.137	A_44_P364961	RHOBTB3	Rho related BTB domain containing 3	Cytoplasm	enzyme
-3.141	A_44_P389590	CILP	cartilage intermediate layer protein	Extracellular Space	phosphatase
-3.192	A_44_P263777	SLC6A20	solute carrier family 6 member 20	Plasma Membrane	transporter
-3.21	A_42_P676553	TNNI3	troponin I3, cardiac type	Cytoplasm	transporter
-3.219	A_44_P135066	GALNT13	polypeptide N-acetylgalactosaminyltransferase 13	Cytoplasm	enzyme
-3.223	A_44_P480433	KAZALD1	Kazal type serine peptidase inhibitor domain 1	Extracellular Space	other
-3.254	A_44_P300137	ATP8B3	ATPase phospholipid transporting 8B3	Cytoplasm	transporter
-3.274	A_44_P179296	COL6A5	collagen type VI alpha 5 chain	Extracellular Space	other
-3.289	A_44_P378562	FMO3	flavin containing monooxygenase 3	Cytoplasm	enzyme
-3.306	A_43_P21980	GNAT2	G protein subunit alpha transducin 2	Plasma Membrane	enzyme
-3.384	A_44_P515211	TNFSF15	TNF superfamily member 15	Extracellular Space	cytokine
-3.395	A_42_P823322	SLC23A1	solute carrier family 23 member 1	Plasma Membrane	transporter
-3.442	A_44_P260589	PAPLN	papilin, proteoglycan like sulfated glycoprotein	Extracellular Space	other
-3.445	A_44_P645108	DKK3	dickkopf WNT signaling pathway inhibitor 3	Extracellular Space	cytokine
-3.483	A_44_P215108	LEPR	leptin receptor	Plasma Membrane	transmembrane receptor
-3.514	A_44_P229697	TKTL1	transketolase like 1	Other	enzyme
-3.528	A_44_P553507	ZPLD1	zona pellucida like domain containing 1	Other	other
-3.533	A_44_P605240	Pln	phospholamban	Cytoplasm	other
-3.549	A_44_P314110	ERMN	ermin	Extracellular Space	other
-3.578	A_44_P184938	RLBP1	retinaldehyde binding protein 1	Cytoplasm	transporter
-3.602	A_43_P13051	ST8SIA2	ST8 alpha-N-acetyl-neuraminide alpha-2,8-sialyltransferase 2	Cytoplasm	enzyme
-3.629	A_44_P730489	STARD10	StAR related lipid transfer domain containing 10	Cytoplasm	other
-3.658	A_44_P527024	COL11A2	collagen type XI alpha 2 chain	Extracellular Space	other
-3.676	A_44_P398330	Gm4952	predicted gene 4952	Cytoplasm	other
-3.682	A_44_P176677	ATP1A2	ATPase Na+/K+ transporting subunit alpha 2	Plasma Membrane	transporter
-3.698	A_44_P529455	GNRH1	gonadotropin releasing hormone 1	Extracellular Space	other
-3.699	A_44_P305870	TPPP3	tubulin polymerization promoting protein family member 3	Cytoplasm	other
-3.707	A_44_P123636	COL11A1	collagen type XI alpha 1 chain	Extracellular Space	other
-3.72	A_44_P328121	SV2B	synaptic vesicle glycoprotein 2B	Plasma Membrane	transporter
-3.758	A_44_P854845	IGLON5	IgLON family member 5	Other	other
-3.765	A_44_P140429	ASB9	ankyrin repeat and SOCS box containing 9	Nucleus	transcription regulator
-3.798	A_44_P960765	CHODL	chondrolectin	Plasma Membrane	other
-3.869	A_44_P838490	RGR	retinal G protein coupled receptor	Plasma Membrane	G-protein coupled receptor
-3.877	A_44_P900083	SPATA46	spermatogenesis associated 46	Nucleus	other
-3.931	A_42_P543633	GLRB	glycine receptor beta	Plasma Membrane	ion channel
-3.943	A_44_P396772	LRRN1	leucine rich repeat neuronal 1	Other	other
-3.985	A_43_P12115	PROM1	prominin 1	Plasma Membrane	other
-4.014	A_44_P199573	ISLR	immunoglobulin superfamily containing leucine rich repeat	Extracellular Space	other
-4.297	A_43_P11955	SYN2	synapsin II	Plasma Membrane	other
-4.415	A_44_P288916	SLC30A10	solute carrier family 30 member 10	Other	transporter
-4.427	A_44_P544757	TMEM178B	transmembrane protein 178B	Other	other
-4.687	A_44_P411196	ULK1	unc-51 like autophagy activating kinase 1	Cytoplasm	kinase
-4.759	A_44_P157881	FMO2	flavin containing monooxygenase 2	Cytoplasm	enzyme
-4.762	A_44_P550145	SCD	stearoyl-CoA desaturase	Cytoplasm	enzyme
-4.823	A_42_P737738	SLC18A3	solute carrier family 18 member A3	Plasma Membrane	transporter
-4.856	A_44_P478172	Tdpoz2	TD and POZ domain containing 2	Other	other
-4.983	A_44_P321867	FAM213A	family with sequence similarity 213 member A	Extracellular Space	other
-5.055	A_44_P241156	MAMDC2	MAM domain containing 2	Extracellular Space	other
-5.317	A_44_P791404	Luzp2	leucine zipper protein 2	Other	other
-5.435	A_44_P400756	CSMD1	CUB and Sushi multiple domains 1	Plasma Membrane	other
-5.52	A_44_P263037	PNPLA3	patatin like phospholipase domain containing 3	Cytoplasm	enzyme
-5.586	A_44_P193130	SFTPA1	surfactant protein A1	Extracellular Space	transporter
-6.095	A_43_P19435	EGFL6	EGF like domain multiple 6	Extracellular Space	other
-6.277	A_44_P295531	9530003J23Rik	RIKEN cDNA 9530003J23 gene	Extracellular Space	other
-6.462	A_44_P132714	PCLO	piccolo presynaptic cytomatrix protein	Cytoplasm	transporter
-6.922	A_44_P870348	SLC35D3	solute carrier family 35 member D3	Cytoplasm	other
-7.301	A_44_P405381	C1QTNF3	C1q and TNF related 3	Extracellular Space	other
-7.424	A_44_P1042952	Hrk	harakiri, BCL2 interacting protein (contains only BH3 domain)	Cytoplasm	other
-8.383	A_44_P558411	SCRG1	stimulator of chondrogenesis 1	Extracellular Space	other
-10.983	A_44_P289627	GRIA2	glutamate ionotropic receptor AMPA type subunit 2	Plasma Membrane	ion channel
-36.855	A_44_P321009	CYP1A1	cytochrome P450 family 1 subfamily A member 1	Cytoplasm	enzyme

## Sheet: 4d
Expr Fold Change	ID	Symbol	Entrez Gene Name	Location	Type(s)
152.772	A_44_P473510	VSIG4	V-set and immunoglobulin domain containing 4	Plasma Membrane	other
128.348	A_44_P555271	MMP12	matrix metallopeptidase 12	Extracellular Space	peptidase
94.697	A_44_P160841	Calcb	calcitonin-related polypeptide, beta	Extracellular Space	other
94.283	A_44_P340261	Stra6l	STRA6-like	Plasma Membrane	other
70.345	A_44_P448431	CD8A	CD8a molecule	Plasma Membrane	other
69.674	A_44_P332790	TRH	thyrotropin releasing hormone	Extracellular Space	other
68.666	A_44_P151156	Kng1/Kng2	kininogen 2	Extracellular Space	other
68.432	A_44_P377266	OLR1	oxidized low density lipoprotein receptor 1	Plasma Membrane	transmembrane receptor
65.351	A_44_P142043	OR6K6	olfactory receptor family 6 subfamily K member 6	Plasma Membrane	G-protein coupled receptor
55.863	A_44_P112546	MRAP2	melanocortin 2 receptor accessory protein 2	Cytoplasm	other
54.401	A_43_P11590	MMP7	matrix metallopeptidase 7	Extracellular Space	peptidase
52.706	A_43_P15961	Clca3b	chloride channel accessory 3B	Other	ion channel
39.657	A_44_P276538	LILRB4	leukocyte immunoglobulin like receptor B4	Plasma Membrane	other
39.648	A_44_P269457	GPR83	G protein-coupled receptor 83	Plasma Membrane	G-protein coupled receptor
38.547	A_42_P495969	Apoc1	apolipoprotein C1	Extracellular Space	other
33.542	A_43_P11672	IL1RL1	interleukin 1 receptor like 1	Plasma Membrane	transmembrane receptor
32.851	A_42_P693821	FOSL1	FOS like 1, AP-1 transcription factor subunit	Nucleus	transcription regulator
30.85	A_44_P1027971	GPR84	G protein-coupled receptor 84	Plasma Membrane	G-protein coupled receptor
30.54	A_44_P311364	Clca3a1/Clca3a2	chloride channel accessory 3A1	Plasma Membrane	ion channel
30.009	A_43_P11861	DIO3	iodothyronine deiodinase 3	Plasma Membrane	enzyme
29.606	A_44_P716457	LOC100911216/Pcsk1	proprotein convertase subtilisin/kexin type 1	Plasma Membrane	peptidase
29.123	A_44_P990376	GPNMB	glycoprotein nmb	Plasma Membrane	enzyme
28.887	A_44_P704618	FAM167A	family with sequence similarity 167 member A	Cytoplasm	other
28.811	A_44_P396842	UCN2	urocortin 2	Extracellular Space	other
28.273	A_44_P260663	PARVG	parvin gamma	Cytoplasm	other
28.268	A_44_P325522	LMNB1	lamin B1	Nucleus	other
28.084	A_42_P480723	CD8B	CD8b molecule	Plasma Membrane	other
27.717	A_43_P15638	TNC	tenascin C	Extracellular Space	other
27.625	A_44_P114207	HK3	hexokinase 3	Cytoplasm	kinase
27.416	A_44_P485051	Siglech	sialic acid binding Ig-like lectin H	Plasma Membrane	other
27.003	A_44_P183638	Pirb	paired Ig-like receptor B	Plasma Membrane	other
26.418	A_44_P458855	PTPRN	protein tyrosine phosphatase, receptor type N	Plasma Membrane	phosphatase
25.54	A_44_P371339	IL6	interleukin 6	Extracellular Space	cytokine
23.85	A_44_P163242	EPCAM	epithelial cell adhesion molecule	Plasma Membrane	other
22.242	A_44_P930826	Clec2d (includes others)	C-type lectin domain family 2, member D	Plasma Membrane	other
21.612	A_44_P640180	ZC2HC1B	zinc finger C2HC-type containing 1B	Other	other
20.429	A_44_P409840	CCL17	C-C motif chemokine ligand 17	Extracellular Space	cytokine
19.965	A_43_P13048	TNFSF11	TNF superfamily member 11	Extracellular Space	cytokine
19.577	A_44_P850143	TLX2	T-cell leukemia homeobox 2	Nucleus	transcription regulator
19.398	A_44_P107596	CTSW	cathepsin W	Cytoplasm	peptidase
18.909	A_44_P292547	OR5AP2	olfactory receptor family 5 subfamily AP member 2	Plasma Membrane	G-protein coupled receptor
18.344	A_43_P14894	Nppb	natriuretic peptide type B	Other	other
18.184	A_44_P470619	SRXN1	sulfiredoxin 1	Cytoplasm	enzyme
18.1	A_44_P1050595	CELA1	chymotrypsin like elastase family member 1	Extracellular Space	peptidase
17.886	A_44_P501112	MMP9	matrix metallopeptidase 9	Extracellular Space	peptidase
17.697	A_43_P13203	Wfdc17/Wfdc18	WAP four-disulfide core domain 18	Extracellular Space	other
16.025	A_44_P514627	ADGRL3	adhesion G protein-coupled receptor L3	Plasma Membrane	G-protein coupled receptor
15.893	A_43_P22979	TYRP1	tyrosinase related protein 1	Cytoplasm	enzyme
15.309	A_44_P578061	MAB21L3	mab-21 like 3	Other	other
15.002	A_44_P101361	Hmga2	high mobility group AT-hook 2	Nucleus	enzyme
14.898	A_44_P247281	CXCL14	C-X-C motif chemokine ligand 14	Extracellular Space	cytokine
14.889	A_44_P121517	CD180	CD180 molecule	Plasma Membrane	other
14.418	A_42_P791677	AREG	amphiregulin	Extracellular Space	growth factor
14.292	A_44_P714618	Arl4c	ADP-ribosylation factor like GTPase 4C	Cytoplasm	other
14.188	A_44_P411954	CD2	CD2 molecule	Plasma Membrane	transmembrane receptor
14.007	A_43_P13420	SPON1	spondin 1	Extracellular Space	other
13.853	A_44_P135094	Art2b	ADP-ribosyltransferase 2b	Plasma Membrane	enzyme
12.863	A_44_P1058520	SH2D1A	SH2 domain containing 1A	Cytoplasm	other
12.69	A_44_P854174	C3orf80	chromosome 3 open reading frame 80	Other	other
12.639	A_44_P237153	BIRC5	baculoviral IAP repeat containing 5	Cytoplasm	other
12.548	A_44_P264694	APOC4	apolipoprotein C4	Extracellular Space	transporter
12.412	A_44_P624451	C10orf128	chromosome 10 open reading frame 128	Other	other
12.058	A_44_P556989	NGFR	nerve growth factor receptor	Plasma Membrane	transmembrane receptor
11.846	A_43_P13246	XCL1	X-C motif chemokine ligand 1	Extracellular Space	cytokine
11.768	A_44_P255817	PRAM1	PML-RARA regulated adaptor molecule 1	Other	other
11.558	A_44_P103225	CD3E	CD3e molecule	Plasma Membrane	transmembrane receptor
11.519	A_44_P153516	SLC18A2	solute carrier family 18 member A2	Plasma Membrane	transporter
11.319	A_44_P184297	RUNX2	runt related transcription factor 2	Nucleus	transcription regulator
11.244	A_42_P525886	CRABP1	cellular retinoic acid binding protein 1	Cytoplasm	transporter
11.083	A_44_P563229	Klrb1f	killer cell lectin-like receptor subfamily B member 1F	Plasma Membrane	other
10.978	A_44_P233786	VGF	VGF nerve growth factor inducible	Extracellular Space	growth factor
10.97	A_44_P192393	ACER1	alkaline ceramidase 1	Cytoplasm	enzyme
10.947	A_44_P550938	PCDH11X	protocadherin 11 X-linked	Plasma Membrane	other
10.928	A_44_P484730	OR8H2	olfactory receptor family 8 subfamily H member 2	Plasma Membrane	G-protein coupled receptor
10.874	A_44_P730837	DSG2	desmoglein 2	Plasma Membrane	other
10.726	A_43_P13004	CDH17	cadherin 17	Plasma Membrane	transporter
10.591	A_44_P462661	IL1RN	interleukin 1 receptor antagonist	Extracellular Space	cytokine
10.57	A_44_P463899	PILRB	paired immunoglobin-like type 2 receptor beta	Plasma Membrane	other
10.473	A_44_P529645	MCEMP1	mast cell expressed membrane protein 1	Cytoplasm	other
10.374	A_44_P327890	TFAP2C	transcription factor AP-2 gamma	Nucleus	transcription regulator
10.34	A_44_P156462	REN	renin	Extracellular Space	peptidase
10.204	A_44_P452222	ITGAL	integrin subunit alpha L	Plasma Membrane	transmembrane receptor
10.104	A_44_P248506	IFNE	interferon epsilon	Extracellular Space	cytokine
10.099	A_44_P1047933	MAPK1	mitogen-activated protein kinase 1	Cytoplasm	kinase
10.079	A_44_P372254	Slpi (includes others)	secretory leukocyte peptidase inhibitor	Cytoplasm	other
10.031	A_42_P598304	KLRB1	killer cell lectin like receptor B1	Plasma Membrane	transmembrane receptor
9.924	A_44_P372587	CX3CR1	C-X3-C motif chemokine receptor 1	Plasma Membrane	G-protein coupled receptor
9.79	A_44_P974179	LCA5L	LCA5L, lebercilin like	Extracellular Space	other
9.693	A_44_P438117	RGS1	regulator of G protein signaling 1	Plasma Membrane	other
9.47	A_44_P130818	LGI3	leucine rich repeat LGI family member 3	Extracellular Space	other
9.441	A_44_P144741	BLNK	B-cell linker	Cytoplasm	other
9.437	A_44_P298049	NCF1	neutrophil cytosolic factor 1	Cytoplasm	enzyme
9.433	A_44_P335219	IL21R	interleukin 21 receptor	Plasma Membrane	transmembrane receptor
9.426	A_44_P332505	ACPP	acid phosphatase, prostate	Extracellular Space	phosphatase
9.354	A_44_P550768	LOC102555173	uncharacterized LOC102555173	Other	other
9.302	A_44_P928825	MSR1	macrophage scavenger receptor 1	Plasma Membrane	transmembrane receptor
9.266	A_42_P598412	APOBEC1	apolipoprotein B mRNA editing enzyme catalytic subunit 1	Cytoplasm	enzyme
9.22	A_44_P150185	LTBP2	latent transforming growth factor beta binding protein 2	Extracellular Space	other
9.164	A_44_P405374	LOC290071	similar to T cell receptor V-alpha J-alpha	Other	other
9.143	A_43_P11472	HMOX1	heme oxygenase 1	Cytoplasm	enzyme
9.055	A_43_P12276	VAX1	ventral anterior homeobox 1	Nucleus	transcription regulator
8.765	A_44_P355958	Olfr876	olfactory receptor 876	Plasma Membrane	G-protein coupled receptor
8.735	A_43_P19999	Fcrls	Fc receptor-like S, scavenger receptor	Plasma Membrane	other
8.691	A_44_P668582	ARHGAP25	Rho GTPase activating protein 25	Cytoplasm	other
8.62	A_44_P602702	MPEG1	macrophage expressed 1	Cytoplasm	other
8.601	A_44_P1039616	CD300C	CD300c molecule	Plasma Membrane	transmembrane receptor
8.57	A_44_P311096	ABCB4	ATP binding cassette subfamily B member 4	Plasma Membrane	transporter
8.559	A_43_P12274	Lst1	leukocyte specific transcript 1	Cytoplasm	other
8.447	A_42_P527724	FCN1	ficolin 1	Extracellular Space	peptidase
8.438	A_44_P355702	IGFBP3	insulin like growth factor binding protein 3	Extracellular Space	other
8.431	A_43_P12450	FABP7	fatty acid binding protein 7	Cytoplasm	transporter
8.302	A_44_P464045	ARL11	ADP ribosylation factor like GTPase 11	Other	other
8.283	A_44_P507053	LOC690020	similar to killer cell lectin-like receptor, subfamily A, member 17	Other	other
8.246	A_44_P323106	ABCA1	ATP binding cassette subfamily A member 1	Plasma Membrane	transporter
8.22	A_44_P163301	Olr1171/Olr1177	olfactory receptor 1177	Other	other
8.217	A_44_P295563	COL7A1	collagen type VII alpha 1 chain	Extracellular Space	other
8.208	A_44_P365351	Olr1346	olfactory receptor 1346	Plasma Membrane	G-protein coupled receptor
8.202	A_44_P168405	FCGR2A	Fc fragment of IgG receptor IIa	Plasma Membrane	transmembrane receptor
8.174	A_44_P358151	Sectm1b	secreted and transmembrane 1B	Extracellular Space	cytokine
8.139	A_44_P536089	Klre1	killer cell lectin-like receptor family E member 1	Plasma Membrane	transmembrane receptor
8.136	A_44_P1038296	CD68	CD68 molecule	Plasma Membrane	other
8.085	A_44_P515548	LOC685020/Pilra	paired immunoglobin-like type 2 receptor alpha	Cytoplasm	other
8.026	A_43_P22042	PLA2G7	phospholipase A2 group VII	Extracellular Space	enzyme
7.957	A_44_P849944	PRSS35	protease, serine 35	Extracellular Space	peptidase
7.954	A_44_P606174	BCL2L14	BCL2 like 14	Cytoplasm	other
7.941	A_44_P157314	CLEC4D	C-type lectin domain family 4 member D	Plasma Membrane	other
7.938	A_44_P477819	NRG1	neuregulin 1	Plasma Membrane	growth factor
7.918	A_42_P591344	ITGB2	integrin subunit beta 2	Plasma Membrane	transmembrane receptor
7.902	A_44_P130063	CFI	complement factor I	Extracellular Space	peptidase
7.896	A_44_P266817	Klra22	killer cell lectin-like receptor subfamily A, member 22	Other	other
7.839	A_44_P326031	ATP8A2	ATPase phospholipid transporting 8A2	Plasma Membrane	transporter
7.805	A_44_P497011	TRB	T-cell receptor beta locus	Plasma Membrane	transmembrane receptor
7.774	A_44_P220455	CSF3R	colony stimulating factor 3 receptor	Plasma Membrane	transmembrane receptor
7.736	A_42_P466283	GZMK	granzyme K	Cytoplasm	peptidase
7.729	A_44_P1009603	GTSE1	G2 and S-phase expressed 1	Cytoplasm	other
7.667	A_44_P226771	MAPK8IP3	mitogen-activated protein kinase 8 interacting protein 3	Cytoplasm	other
7.656	A_44_P232205	BIN2	bridging integrator 2	Plasma Membrane	other
7.636	A_44_P438060	GNA15	G protein subunit alpha 15	Plasma Membrane	enzyme
7.633	A_43_P11086	UPK1B	uroplakin 1B	Plasma Membrane	other
7.604	A_44_P438922	KLHL6	kelch like family member 6	Other	other
7.549	A_44_P932384	PLXNC1	plexin C1	Plasma Membrane	transmembrane receptor
7.542	A_42_P602511	KCNN4	potassium calcium-activated channel subfamily N member 4	Plasma Membrane	ion channel
7.513	A_44_P1013006	STEAP1	STEAP family member 1	Plasma Membrane	transporter
7.452	A_42_P512838	Trem2	triggering receptor expressed on myeloid cells 2	Other	other
7.393	A_43_P16370	OR4C45	olfactory receptor family 4 subfamily C member 45 (gene/pseudogene)	Plasma Membrane	G-protein coupled receptor
7.389	A_44_P168875	TMEM108	transmembrane protein 108	Plasma Membrane	other
7.262	A_44_P404843	CXCR3	C-X-C motif chemokine receptor 3	Plasma Membrane	G-protein coupled receptor
7.228	A_44_P379360	FUT7	fucosyltransferase 7	Cytoplasm	enzyme
7.165	A_44_P1039249	DOK3	docking protein 3	Cytoplasm	other
7.074	A_44_P994692	ZAP70	zeta chain of T-cell receptor associated protein kinase 70	Plasma Membrane	kinase
7.048	A_42_P500080	NKG7	natural killer cell granule protein 7	Plasma Membrane	other
6.962	A_44_P470824	TRIP13	thyroid hormone receptor interactor 13	Cytoplasm	transcription regulator
6.959	A_44_P259851	OR4X1	olfactory receptor family 4 subfamily X member 1 (gene/pseudogene)	Plasma Membrane	G-protein coupled receptor
6.95	A_44_P792845	RUNX3	runt related transcription factor 3	Nucleus	transcription regulator
6.913	A_44_P546123	MCM5	minichromosome maintenance complex component 5	Nucleus	enzyme
6.913	A_44_P452070	OR51I1	olfactory receptor family 51 subfamily I member 1	Plasma Membrane	G-protein coupled receptor
6.906	A_44_P575152	C16orf96	chromosome 16 open reading frame 96	Other	other
6.878	A_44_P319979	VMP1	vacuole membrane protein 1	Plasma Membrane	other
6.876	A_42_P585750	CD300LD	CD300 molecule like family member d	Plasma Membrane	other
6.841	A_43_P18226	MYO1F	myosin IF	Cytoplasm	other
6.837	A_44_P304220	EMB	embigin	Plasma Membrane	transporter
6.789	A_43_P11809	UMOD	uromodulin	Extracellular Space	other
6.702	A_44_P276803	ZNF341	zinc finger protein 341	Nucleus	other
6.685	A_43_P11879	HTR2B	5-hydroxytryptamine receptor 2B	Plasma Membrane	G-protein coupled receptor
6.609	A_43_P21322	HCLS1	hematopoietic cell-specific Lyn substrate 1	Nucleus	other
6.592	A_44_P468468	LBP	lipopolysaccharide binding protein	Plasma Membrane	transporter
6.575	A_42_P601961	SUSD3	sushi domain containing 3	Plasma Membrane	other
6.526	A_44_P494754	CLSPN	claspin	Nucleus	other
6.477	A_44_P409803	CD5	CD5 molecule	Plasma Membrane	transmembrane receptor
6.476	A_44_P433935	PLAC1	placenta specific 1	Plasma Membrane	other
6.449	A_44_P311136	VAV1	vav guanine nucleotide exchange factor 1	Nucleus	transcription regulator
6.448	A_44_P342923	FIBIN	fin bud initiation factor homolog (zebrafish)	Cytoplasm	other
6.392	A_43_P15900	CCL22	C-C motif chemokine ligand 22	Extracellular Space	cytokine
6.383	A_44_P527480	CCNA2	cyclin A2	Nucleus	other
6.366	A_43_P22811	CD6	CD6 molecule	Plasma Membrane	transmembrane receptor
6.301	A_44_P835847	C1QTNF3	C1q and TNF related 3	Extracellular Space	other
6.291	A_44_P290953	CLVS1	clavesin 1	Cytoplasm	other
6.285	A_44_P590505	C130050O18Rik	RIKEN cDNA C130050O18 gene	Other	other
6.257	A_44_P259977	ARNTL2	aryl hydrocarbon receptor nuclear translocator like 2	Nucleus	transcription regulator
6.183	A_43_P10939	PCLAF	PCNA clamp associated factor	Nucleus	other
6.178	A_44_P265709	IL2RB	interleukin 2 receptor subunit beta	Plasma Membrane	transmembrane receptor
6.177	A_44_P179904	SH2D2A	SH2 domain containing 2A	Cytoplasm	other
6.175	A_44_P976687	CENPW	centromere protein W	Nucleus	other
6.154	A_44_P945669	DSN1	DSN1 homolog, MIS12 kinetochore complex component	Nucleus	other
6.139	A_44_P290786	LRIT3	leucine rich repeat, Ig-like and transmembrane domains 3	Other	other
6.127	A_44_P217744	LOC100911403/Ms4a4a	membrane-spanning 4-domains, subfamily A, member 4A	Other	other
6.106	A_44_P424188	PLCXD3	phosphatidylinositol specific phospholipase C X domain containing 3	Other	other
6.077	A_42_P579174	CD3D	CD3d molecule	Plasma Membrane	transmembrane receptor
6.073	A_44_P286409	TTK	TTK protein kinase	Nucleus	kinase
6.059	A_43_P11543	KLRD1	killer cell lectin like receptor D1	Plasma Membrane	transmembrane receptor
6.059	A_44_P224810	NLRP10	NLR family pyrin domain containing 10	Other	other
6.053	A_44_P308827	Olfr582	olfactory receptor 582	Plasma Membrane	G-protein coupled receptor
6.051	A_43_P15819	PRSS22	protease, serine 22	Extracellular Space	peptidase
6.038	A_44_P266892	Olfr711	olfactory receptor 711	Plasma Membrane	G-protein coupled receptor
6.025	A_44_P452632	IRF8	interferon regulatory factor 8	Nucleus	transcription regulator
5.984	A_42_P676304	Ifitm1	interferon induced transmembrane protein 1	Other	other
5.982	A_44_P698466	LRRTM2	leucine rich repeat transmembrane neuronal 2	Plasma Membrane	other
5.971	A_44_P185355	BCL11B	B-cell CLL/lymphoma 11B	Nucleus	transcription regulator
5.959	A_44_P809374	CLCF1	cardiotrophin like cytokine factor 1	Extracellular Space	cytokine
5.954	A_44_P518576	MIS18A	MIS18 kinetochore protein A	Nucleus	other
5.952	A_44_P440302	Olfr1179	olfactory receptor 1179	Plasma Membrane	G-protein coupled receptor
5.942	A_44_P410469	B430306N03Rik	RIKEN cDNA B430306N03 gene	Other	other
5.936	A_44_P276338	MCM6	minichromosome maintenance complex component 6	Nucleus	enzyme
5.922	A_43_P15106	E2F8	E2F transcription factor 8	Nucleus	transcription regulator
5.913	A_44_P431296	GPR18	G protein-coupled receptor 18	Plasma Membrane	G-protein coupled receptor
5.905	A_42_P686234	Muc4	mucin 4	Plasma Membrane	other
5.851	A_44_P992578	RRM2	ribonucleotide reductase regulatory subunit M2	Nucleus	enzyme
5.824	A_43_P18698	SEPT1	septin 1	Cytoplasm	enzyme
5.804	A_44_P859421	SH2D5	SH2 domain containing 5	Plasma Membrane	other
5.796	A_42_P787160	Ptprv	protein tyrosine phosphatase, receptor type, V	Other	other
5.793	A_44_P365642	KLK5	kallikrein related peptidase 5	Extracellular Space	peptidase
5.777	A_42_P749184	PENK	proenkephalin	Extracellular Space	other
5.739	A_44_P1037706	GLOD5	glyoxalase domain containing 5	Other	other
5.739	A_44_P1004392	SIDT1	SID1 transmembrane family member 1	Other	other
5.673	A_44_P255149	Klrc2/Klrc3	killer cell lectin-like receptor subfamily C, member 2	Plasma Membrane	transmembrane receptor
5.631	A_44_P435955	PILRA	paired immunoglobin like type 2 receptor alpha	Plasma Membrane	other
5.627	A_44_P304323	CCL5	C-C motif chemokine ligand 5	Extracellular Space	cytokine
5.62	A_43_P18241	CENPU	centromere protein U	Nucleus	other
5.615	A_43_P10690	Klra17 (includes others)	similar to immunoreceptor Ly49si3	Other	other
5.6	A_44_P140514	CENPA	centromere protein A	Nucleus	other
5.589	A_43_P11749	HCK	HCK proto-oncogene, Src family tyrosine kinase	Cytoplasm	kinase
5.586	A_44_P252517	Havcr1	hepatitis A virus cellular receptor 1	Plasma Membrane	other
5.585	A_44_P487000	Olfr1181/Olfr1182	olfactory receptor 1181	Plasma Membrane	G-protein coupled receptor
5.584	A_44_P419810	LRR1	leucine rich repeat protein 1	Other	enzyme
5.562	A_44_P463313	PLK1	polo like kinase 1	Nucleus	kinase
5.55	A_44_P161233	IL18	interleukin 18	Extracellular Space	cytokine
5.536	A_42_P458530	RIPK3	receptor interacting serine/threonine kinase 3	Plasma Membrane	kinase
5.526	A_44_P481971	NRP1	neuropilin 1	Plasma Membrane	transmembrane receptor
5.515	A_44_P347340	CCDC15	coiled-coil domain containing 15	Cytoplasm	other
5.501	A_44_P262556	STAP1	signal transducing adaptor family member 1	Cytoplasm	other
5.486	A_43_P10020	LYZ	lysozyme	Extracellular Space	enzyme
5.48	A_44_P459666	TTC22	tetratricopeptide repeat domain 22	Other	other
5.478	A_44_P544113	ILDR1	immunoglobulin like domain containing receptor 1	Plasma Membrane	transmembrane receptor
5.459	A_43_P19763	TLR2	toll like receptor 2	Plasma Membrane	transmembrane receptor
5.455	A_44_P480157	KIF4A	kinesin family member 4A	Nucleus	other
5.413	A_44_P766913	TRPM2	transient receptor potential cation channel subfamily M member 2	Plasma Membrane	ion channel
5.412	A_44_P866659	ADAM8	ADAM metallopeptidase domain 8	Plasma Membrane	peptidase
5.398	A_44_P605002	SLC45A4	solute carrier family 45 member 4	Other	transporter
5.389	A_44_P182601	LOC103693634	uncharacterized LOC103693634	Other	other
5.383	A_44_P201276	Lilrb3	leukocyte immunoglobulin like receptor B3	Other	other
5.358	A_44_P318861	WDFY4	WDFY family member 4	Other	other
5.353	A_44_P543548	TRA2B	transformer 2 beta homolog	Nucleus	other
5.342	A_44_P189496	FCGR1A	Fc fragment of IgG receptor Ia	Plasma Membrane	transmembrane receptor
5.321	A_44_P531770	TOP2A	topoisomerase (DNA) II alpha	Nucleus	enzyme
5.312	A_44_P469527	TMEM200A	transmembrane protein 200A	Other	other
5.297	A_44_P247815	Olfr199/Olfr201	olfactory receptor 201	Plasma Membrane	G-protein coupled receptor
5.279	A_44_P293904	SYK	spleen associated tyrosine kinase	Cytoplasm	kinase
5.228	A_44_P487764	C1QA	complement C1q A chain	Extracellular Space	peptidase
5.215	A_44_P489862	TNFAIP8L2	TNF alpha induced protein 8 like 2	Cytoplasm	other
5.213	A_42_P827359	MYBL2	MYB proto-oncogene like 2	Nucleus	transcription regulator
5.194	A_44_P114788	ADAMTS8	ADAM metallopeptidase with thrombospondin type 1 motif 8	Extracellular Space	peptidase
5.191	A_43_P14872	SDC1	syndecan 1	Plasma Membrane	enzyme
5.181	A_44_P142594	FAM110A	family with sequence similarity 110 member A	Other	other
5.172	A_44_P163731	GALNTL6	polypeptide N-acetylgalactosaminyltransferase-like 6	Other	other
5.104	A_44_P260072	TBXAS1	thromboxane A synthase 1	Plasma Membrane	enzyme
5.094	A_43_P15803	LOC681290	uncharacterized LOC681290	Other	other
5.087	A_44_P366648	STIL	SCL/TAL1 interrupting locus	Nucleus	other
5.078	A_44_P1021106	LMO4	LIM domain only 4	Nucleus	transcription regulator
5.072	A_44_P997586	PLK4	polo like kinase 4	Cytoplasm	kinase
5.07	A_44_P496327	PRF1	perforin 1	Cytoplasm	transporter
5.064	A_42_P608780	GDF15	growth differentiation factor 15	Extracellular Space	growth factor
5.049	A_44_P405232	TMEM119	transmembrane protein 119	Cytoplasm	other
5.033	A_44_P160877	CFH	complement factor H	Extracellular Space	other
5.007	A_44_P1035483	THBS2	thrombospondin 2	Extracellular Space	other
5.003	A_44_P330783	Trg	T cell receptor gamma locus	Plasma Membrane	other
4.999	A_44_P288333	RGD1565560	similar to ribosomal protein S11	Other	other
4.997	A_43_P12403	FGR	FGR proto-oncogene, Src family tyrosine kinase	Nucleus	kinase
4.986	A_44_P525969	CYBB	cytochrome b-245 beta chain	Cytoplasm	enzyme
4.985	A_44_P497467	Dock4	dedicator of cytokinesis 4	Extracellular Space	other
4.981	A_44_P372839	CENPE	centromere protein E	Nucleus	other
4.979	A_44_P515852	TPX2	TPX2, microtubule nucleation factor	Nucleus	other
4.963	A_44_P325479	CCNB1	cyclin B1	Cytoplasm	kinase
4.963	A_44_P355928	CTSS	cathepsin S	Cytoplasm	peptidase
4.961	A_43_P19848	C7orf72	chromosome 7 open reading frame 72	Other	other
4.96	A_44_P213100	PTPN22	protein tyrosine phosphatase, non-receptor type 22	Cytoplasm	phosphatase
4.955	A_44_P530196	MKI67	marker of proliferation Ki-67	Nucleus	other
4.95	A_44_P439493	PLA2G10	phospholipase A2 group X	Cytoplasm	enzyme
4.947	A_44_P700270	PIMREG	PICALM interacting mitotic regulator	Nucleus	other
4.934	A_44_P467269	CCNF	cyclin F	Nucleus	enzyme
4.928	A_43_P11574	ST8SIA1	ST8 alpha-N-acetyl-neuraminide alpha-2,8-sialyltransferase 1	Cytoplasm	enzyme
4.913	A_44_P250368	TK1	thymidine kinase 1	Cytoplasm	kinase
4.885	A_44_P210268	Olfr281	olfactory receptor 281	Plasma Membrane	G-protein coupled receptor
4.883	A_42_P708181	KNTC1	kinetochore associated 1	Nucleus	other
4.881	A_44_P507469	MYOF	myoferlin	Nucleus	other
4.881	A_44_P363071	Olfr283	olfactory receptor 283	Plasma Membrane	G-protein coupled receptor
4.88	A_44_P309179	DTL	denticleless E3 ubiquitin protein ligase homolog	Nucleus	other
4.874	A_44_P173330	SNX20	sorting nexin 20	Cytoplasm	other
4.864	A_44_P918225	SLC8A1	solute carrier family 8 member A1	Plasma Membrane	transporter
4.853	A_44_P956203	SASH3	SAM and SH3 domain containing 3	Cytoplasm	other
4.84	A_44_P210173	TNFRSF12A	TNF receptor superfamily member 12A	Plasma Membrane	transmembrane receptor
4.805	A_44_P335232	OCIAD2	OCIA domain containing 2	Cytoplasm	other
4.783	A_43_P15427	Sct	secretin	Extracellular Space	other
4.78	A_43_P10723	BUB1B	BUB1 mitotic checkpoint serine/threonine kinase B	Nucleus	kinase
4.776	A_44_P761837	KIF14	kinesin family member 14	Cytoplasm	enzyme
4.772	A_44_P480925	LOC728392	uncharacterized LOC728392	Other	other
4.75	A_44_P227604	EME1	essential meiotic structure-specific endonuclease 1	Nucleus	enzyme
4.742	A_44_P506980	KCNK13	potassium two pore domain channel subfamily K member 13	Plasma Membrane	ion channel
4.742	A_44_P520058	UHRF1	ubiquitin like with PHD and ring finger domains 1	Nucleus	transcription regulator
4.73	A_44_P760780	MCM3	minichromosome maintenance complex component 3	Nucleus	enzyme
4.729	A_43_P12508	PTGER2	prostaglandin E receptor 2	Plasma Membrane	G-protein coupled receptor
4.728	A_42_P580844	CDK1	cyclin dependent kinase 1	Nucleus	kinase
4.728	A_44_P1042360	Clec4a3	C-type lectin domain family 4, member a3	Other	other
4.72	A_44_P206292	CDCA3	cell division cycle associated 3	Cytoplasm	other
4.678	A_43_P13122	Gucy2d	guanylate cyclase 2d	Other	enzyme
4.659	A_44_P236738	POLE2	DNA polymerase epsilon 2, accessory subunit	Nucleus	enzyme
4.655	A_44_P391118	Olfr1324	olfactory receptor 1324	Plasma Membrane	G-protein coupled receptor
4.639	A_42_P614692	OPLAH	5-oxoprolinase (ATP-hydrolysing)	Cytoplasm	enzyme
4.632	A_44_P128013	MRGPRX3	MAS related GPR family member X3	Plasma Membrane	G-protein coupled receptor
4.62	A_44_P249033	HMGA1	high mobility group AT-hook 1	Nucleus	transcription regulator
4.604	A_44_P344492	STAT4	signal transducer and activator of transcription 4	Nucleus	transcription regulator
4.602	A_44_P436280	PLTP	phospholipid transfer protein	Extracellular Space	enzyme
4.602	A_43_P17687	TACC3	transforming acidic coiled-coil containing protein 3	Nucleus	other
4.576	A_44_P493603	TMEM255A	transmembrane protein 255A	Extracellular Space	other
4.566	A_44_P1040503	PCTP	phosphatidylcholine transfer protein	Cytoplasm	transporter
4.547	A_42_P626008	KNSTRN	kinetochore localized astrin/SPAG5 binding protein	Cytoplasm	other
4.542	A_44_P104021	SOX4	SRY-box 4	Nucleus	transcription regulator
4.535	A_44_P222166	CD86	CD86 molecule	Plasma Membrane	transmembrane receptor
4.519	A_44_P492104	FERMT3	fermitin family member 3	Cytoplasm	enzyme
4.515	A_44_P299933	Ncaph	non-SMC condensin I complex, subunit H	Cytoplasm	other
4.514	A_44_P340345	RPL10L	ribosomal protein L10 like	Nucleus	other
4.51	A_44_P475444	RGD1564614	similar to complement factor H-related protein	Cytoplasm	other
4.495	A_43_P13117	LCP2	lymphocyte cytosolic protein 2	Cytoplasm	other
4.489	A_44_P428420	CTSZ	cathepsin Z	Cytoplasm	peptidase
4.472	A_44_P577090	RAD51	RAD51 recombinase	Nucleus	enzyme
4.453	A_44_P228942	RUNX1	runt related transcription factor 1	Nucleus	transcription regulator
4.451	A_43_P12529	STXBP2	syntaxin binding protein 2	Plasma Membrane	transporter
4.444	A_44_P239281	CDC6	cell division cycle 6	Nucleus	other
4.424	A_44_P257582	CSF1R	colony stimulating factor 1 receptor	Plasma Membrane	kinase
4.422	A_42_P735417	FCGR2B	Fc fragment of IgG receptor IIb	Plasma Membrane	transmembrane receptor
4.42	A_44_P182412	CCNE1	cyclin E1	Nucleus	transcription regulator
4.42	A_44_P515317	IGFBP4	insulin like growth factor binding protein 4	Extracellular Space	other
4.415	A_44_P398729	SBNO2	strawberry notch homolog 2	Other	transcription regulator
4.413	A_44_P473159	CENPI	centromere protein I	Nucleus	other
4.405	A_43_P23155	MCM10	minichromosome maintenance 10 replication initiation factor	Nucleus	other
4.396	A_44_P1005213	NUF2	NUF2, NDC80 kinetochore complex component	Nucleus	other
4.385	A_44_P551075	NFAM1	NFAT activating protein with ITAM motif 1	Plasma Membrane	transmembrane receptor
4.382	A_44_P346537	Olfr482	olfactory receptor 482	Plasma Membrane	G-protein coupled receptor
4.376	A_43_P20133	SKIL	SKI like proto-oncogene	Nucleus	transcription regulator
4.375	A_43_P22080	LCP1	lymphocyte cytosolic protein 1	Cytoplasm	other
4.365	A_42_P732259	FAM26F	family with sequence similarity 26 member F	Other	other
4.35	A_44_P511128	NUSAP1	nucleolar and spindle associated protein 1	Nucleus	other
4.342	A_44_P296924	RDH10	retinol dehydrogenase 10	Nucleus	enzyme
4.329	A_44_P332834	CEP72	centrosomal protein 72	Cytoplasm	other
4.324	A_44_P372853	Psx1 (includes others)	placenta specific homeobox 1	Other	other
4.32	A_44_P266765	Cyp2d1/Cyp2d5	cytochrome P450, family 2, subfamily d, polypeptide 1	Cytoplasm	enzyme
4.315	A_43_P20530	STEAP2	STEAP2 metalloreductase	Plasma Membrane	transporter
4.295	A_44_P194806	BAALC	brain and acute leukemia, cytoplasmic	Cytoplasm	other
4.291	A_43_P17459	NIF3L1	NGG1 interacting factor 3 like 1	Cytoplasm	other
4.282	A_43_P10931	GPR68	G protein-coupled receptor 68	Plasma Membrane	G-protein coupled receptor
4.282	A_44_P1014388	MMS22L	MMS22 like, DNA repair protein	Nucleus	other
4.278	A_44_P262517	LOC689412	similar to CG4025-PA	Other	other
4.271	A_44_P511304	LCK	LCK proto-oncogene, Src family tyrosine kinase	Cytoplasm	kinase
4.27	A_44_P866810	TEAD2	TEA domain transcription factor 2	Nucleus	transcription regulator
4.266	A_44_P655718	FAM72A	family with sequence similarity 72 member A	Cytoplasm	other
4.266	A_44_P838436	MAPK11	mitogen-activated protein kinase 11	Cytoplasm	kinase
4.264	A_44_P114537	Celf4	CUGBP, Elav-like family member 4	Nucleus	other
4.263	A_44_P114000	Olfr398	olfactory receptor 398	Plasma Membrane	G-protein coupled receptor
4.258	A_43_P12878	ST14	suppression of tumorigenicity 14	Plasma Membrane	peptidase
4.238	A_44_P297428	NCAPG	non-SMC condensin I complex subunit G	Nucleus	other
4.234	A_43_P20126	CENPH	centromere protein H	Nucleus	other
4.233	A_42_P807697	TYROBP	TYRO protein tyrosine kinase binding protein	Plasma Membrane	transmembrane receptor
4.231	A_44_P140314	CDC25C	cell division cycle 25C	Nucleus	phosphatase
4.228	A_44_P292934	Ms4a4c	membrane-spanning 4-domains, subfamily A, member 4C	Other	other
4.217	A_44_P400158	AURKA	aurora kinase A	Nucleus	kinase
4.215	A_44_P1024773	DSCC1	DNA replication and sister chromatid cohesion 1	Nucleus	other
4.214	A_43_P17059	CRLF1	cytokine receptor like factor 1	Extracellular Space	other
4.205	A_44_P383555	C17orf53	chromosome 17 open reading frame 53	Other	other
4.195	A_44_P292568	OR2D2	olfactory receptor family 2 subfamily D member 2	Plasma Membrane	G-protein coupled receptor
4.185	A_44_P763036	IL10RA	interleukin 10 receptor subunit alpha	Plasma Membrane	transmembrane receptor
4.184	A_44_P265911	CNR2	cannabinoid receptor 2	Plasma Membrane	G-protein coupled receptor
4.182	A_44_P421727	CARD11	caspase recruitment domain family member 11	Cytoplasm	kinase
4.172	A_44_P461544	CCNB2	cyclin B2	Cytoplasm	kinase
4.169	A_44_P461857	LOC102547986	40S ribosomal protein S2-like	Other	other
4.139	A_42_P679371	CORO1A	coronin 1A	Cytoplasm	other
4.139	A_44_P995681	MELK	maternal embryonic leucine zipper kinase	Cytoplasm	kinase
4.124	A_43_P17028	FBLIM1	filamin binding LIM protein 1	Plasma Membrane	other
4.123	A_44_P410348	NLRC4	NLR family CARD domain containing 4	Cytoplasm	other
4.119	A_44_P468141	PLAUR	plasminogen activator, urokinase receptor	Plasma Membrane	transmembrane receptor
4.109	A_44_P227065	KIF22	kinesin family member 22	Nucleus	other
4.098	A_44_P1039606	CENPT	centromere protein T	Cytoplasm	other
4.079	A_44_P483728	RPS6KA1	ribosomal protein S6 kinase A1	Cytoplasm	kinase
4.077	A_44_P500961	GDNF	glial cell derived neurotrophic factor	Extracellular Space	growth factor
4.069	A_44_P426788	PMEPA1	prostate transmembrane protein, androgen induced 1	Plasma Membrane	other
4.059	A_44_P263105	LIMD2	LIM domain containing 2	Other	other
4.058	A_42_P762150	Ikzf1	IKAROS family zinc finger 1	Nucleus	transcription regulator
4.055	A_44_P270468	SLC15A3	solute carrier family 15 member 3	Cytoplasm	transporter
4.051	A_44_P779178	RBM44	RNA binding motif protein 44	Other	other
4.048	A_42_P787410	CACNA1B	calcium voltage-gated channel subunit alpha1 B	Plasma Membrane	ion channel
4.048	A_44_P828142	IL7R	interleukin 7 receptor	Plasma Membrane	transmembrane receptor
4.04	A_44_P365611	GPR31	G protein-coupled receptor 31	Plasma Membrane	G-protein coupled receptor
4.039	A_44_P759995	Tnfrsf22/Tnfrsf23	tumor necrosis factor receptor superfamily, member 22	Plasma Membrane	transmembrane receptor
4.031	A_44_P992516	ARHGAP45	Rho GTPase activating protein 45	Cytoplasm	transporter
4.024	A_43_P14233	PTTG1	pituitary tumor-transforming 1	Nucleus	transcription regulator
4.014	A_42_P473314	LOC100909593/RT1-DMa	RT1 class II, locus DMa	Cytoplasm	other
4.009	A_44_P1019604	UBE2C	ubiquitin conjugating enzyme E2 C	Cytoplasm	enzyme
4.002	A_44_P403058	ANKLE1	ankyrin repeat and LEM domain containing 1	Cytoplasm	enzyme
3.993	A_44_P388755	KIF15	kinesin family member 15	Nucleus	other
3.979	A_44_P956502	PIK3CD	phosphatidylinositol-4,5-bisphosphate 3-kinase catalytic subunit delta	Cytoplasm	kinase
3.962	A_42_P799494	HTATIP2	HIV-1 Tat interactive protein 2	Nucleus	transcription regulator
3.961	A_44_P904810	NCKAP1L	NCK associated protein 1 like	Plasma Membrane	other
3.953	A_44_P654498	C6orf141	chromosome 6 open reading frame 141	Other	other
3.953	A_44_P394636	INPP5D	inositol polyphosphate-5-phosphatase D	Cytoplasm	phosphatase
3.942	A_44_P716145	CXADR	coxsackie virus and adenovirus receptor	Plasma Membrane	transmembrane receptor
3.941	A_44_P1059985	SPC24	SPC24, NDC80 kinetochore complex component	Cytoplasm	other
3.929	A_44_P276120	KISS1R	KISS1 receptor	Plasma Membrane	G-protein coupled receptor
3.929	A_44_P807649	SPRED3	sprouty related EVH1 domain containing 3	Extracellular Space	cytokine
3.913	A_44_P402559	OR10X1	olfactory receptor family 10 subfamily X member 1 (gene/pseudogene)	Plasma Membrane	G-protein coupled receptor
3.911	A_44_P161823	4933415F23Rik	RIKEN cDNA 4933415F23 gene	Other	other
3.911	A_42_P801679	CTSE	cathepsin E	Cytoplasm	peptidase
3.902	A_42_P814235	P2RY6	pyrimidinergic receptor P2Y6	Plasma Membrane	G-protein coupled receptor
3.897	A_44_P561643	GJB3	gap junction protein beta 3	Plasma Membrane	transporter
3.897	A_44_P517012	RAC2	ras-related C3 botulinum toxin substrate 2 (rho family, small GTP binding protein Rac2)	Cytoplasm	enzyme
3.893	A_43_P20099	MELTF	melanotransferrin	Plasma Membrane	other
3.884	A_44_P1035190	BUB1	BUB1 mitotic checkpoint serine/threonine kinase	Nucleus	kinase
3.882	A_44_P496864	SEMA4A	semaphorin 4A	Plasma Membrane	other
3.881	A_42_P663871	GZMA	granzyme A	Cytoplasm	peptidase
3.879	A_44_P500708	C1QC	complement C1q C chain	Extracellular Space	peptidase
3.879	A_44_P475181	SLA	Src like adaptor	Plasma Membrane	other
3.879	A_44_P623115	SLC43A2	solute carrier family 43 member 2	Plasma Membrane	transporter
3.877	A_44_P1010816	SKA1	spindle and kinetochore associated complex subunit 1	Nucleus	other
3.873	A_44_P210668	PDILT	protein disulfide isomerase like, testis expressed	Extracellular Space	enzyme
3.868	A_44_P686987	GPR160	G protein-coupled receptor 160	Plasma Membrane	G-protein coupled receptor
3.866	A_44_P409820	FASLG	Fas ligand	Extracellular Space	cytokine
3.866	A_43_P12172	LGMN	legumain	Cytoplasm	peptidase
3.863	A_44_P125761	Olfr1346	olfactory receptor 1346	Plasma Membrane	G-protein coupled receptor
3.86	A_44_P289039	Brms1/LOC100911841	breast cancer metastasis-suppressor 1	Nucleus	other
3.848	A_44_P258008	FGD2	FYVE, RhoGEF and PH domain containing 2	Cytoplasm	other
3.847	A_44_P839432	GLIS3	GLIS family zinc finger 3	Nucleus	transcription regulator
3.832	A_44_P592923	DDIAS	DNA damage induced apoptosis suppressor	Cytoplasm	other
3.822	A_44_P223446	MCM2	minichromosome maintenance complex component 2	Nucleus	enzyme
3.821	A_44_P333910	Mcpt4	mast cell protease 4	Other	peptidase
3.795	A_44_P144591	CTHRC1	collagen triple helix repeat containing 1	Extracellular Space	other
3.789	A_44_P114851	TMEM8A	transmembrane protein 8A	Plasma Membrane	other
3.776	A_44_P538658	SLC7A7	solute carrier family 7 member 7	Plasma Membrane	transporter
3.763	A_44_P555213	CENPF	centromere protein F	Nucleus	other
3.762	A_44_P500935	SBK1	SH3 domain binding kinase 1	Other	kinase
3.76	A_44_P309266	PBK	PDZ binding kinase	Cytoplasm	kinase
3.756	A_44_P548126	SOCS3	suppressor of cytokine signaling 3	Cytoplasm	phosphatase
3.751	A_44_P518500	RACGAP1	Rac GTPase activating protein 1	Cytoplasm	transporter
3.749	A_43_P11621	CD44	CD44 molecule (Indian blood group)	Plasma Membrane	other
3.747	A_43_P16265	Olfr1353	olfactory receptor 1353	Plasma Membrane	G-protein coupled receptor
3.745	A_43_P22562	Pira2	paired-Ig-like receptor A2	Other	other
3.744	A_44_P314431	BICDL2	BICD family like cargo adaptor 2	Other	other
3.74	A_44_P400494	KRT18	keratin 18	Cytoplasm	other
3.735	A_44_P837219	GUCY2C	guanylate cyclase 2C	Plasma Membrane	kinase
3.733	A_44_P962936	CDCA4	cell division cycle associated 4	Nucleus	other
3.733	A_44_P386359	NINJ1	ninjurin 1	Plasma Membrane	other
3.732	A_44_P225286	MGAT4A	mannosyl (alpha-1,3-)-glycoprotein beta-1,4-N-acetylglucosaminyltransferase, isozyme A	Cytoplasm	enzyme
3.719	A_44_P424481	RCC2	regulator of chromosome condensation 2	Nucleus	other
3.714	A_44_P622560	GALNT6	polypeptide N-acetylgalactosaminyltransferase 6	Cytoplasm	enzyme
3.709	A_44_P206434	LMNB2	lamin B2	Nucleus	other
3.707	A_42_P788740	FOLR2	folate receptor beta	Plasma Membrane	transporter
3.703	A_44_P1027493	LIX1L	limb and CNS expressed 1 like	Other	other
3.697	A_44_P280963	KIFC1	kinesin family member C1	Nucleus	enzyme
3.696	A_44_P281733	NLRP3	NLR family pyrin domain containing 3	Cytoplasm	other
3.694	A_42_P572521	C5AR1	complement C5a receptor 1	Plasma Membrane	G-protein coupled receptor
3.688	A_44_P363736	FHL3	four and a half LIM domains 3	Plasma Membrane	other
3.676	A_44_P234129	DLGAP5	DLG associated protein 5	Nucleus	phosphatase
3.666	A_44_P421534	AIF1	allograft inflammatory factor 1	Nucleus	other
3.648	A_44_P253108	SPC25	SPC25, NDC80 kinetochore complex component	Cytoplasm	other
3.646	A_44_P925486	CD300A	CD300a molecule	Plasma Membrane	transmembrane receptor
3.641	A_43_P17457	CD163	CD163 molecule	Plasma Membrane	transmembrane receptor
3.638	A_44_P640828	TGFBR1	transforming growth factor beta receptor 1	Plasma Membrane	kinase
3.628	A_44_P505039	CDK2	cyclin dependent kinase 2	Nucleus	kinase
3.614	A_44_P199096	RARRES1	retinoic acid receptor responder 1	Plasma Membrane	other
3.613	A_44_P1041539	ARHGAP22	Rho GTPase activating protein 22	Cytoplasm	other
3.611	A_43_P12208	Basp1	brain abundant, membrane attached signal protein 1	Cytoplasm	transcription regulator
3.602	A_42_P508984	PF4	platelet factor 4	Extracellular Space	cytokine
3.599	A_44_P467557	C1QB	complement C1q B chain	Extracellular Space	peptidase
3.588	A_42_P785861	NIPSNAP3A	nipsnap homolog 3A	Nucleus	other
3.567	A_44_P466376	SKA3	spindle and kinetochore associated complex subunit 3	Nucleus	other
3.56	A_44_P525324	ARHGAP11A	Rho GTPase activating protein 11A	Cytoplasm	other
3.552	A_44_P531324	ARHGAP9	Rho GTPase activating protein 9	Cytoplasm	other
3.541	A_42_P800988	PTAFR	platelet activating factor receptor	Plasma Membrane	G-protein coupled receptor
3.536	A_44_P715645	POU2F2	POU class 2 homeobox 2	Nucleus	transcription regulator
3.534	A_44_P215302	UBE2T	ubiquitin conjugating enzyme E2 T	Nucleus	enzyme
3.531	A_44_P213149	MASTL	microtubule associated serine/threonine kinase like	Cytoplasm	kinase
3.53	A_44_P485122	CEP55	centrosomal protein 55	Cytoplasm	other
3.528	A_44_P430532	CHSY1	chondroitin sulfate synthase 1	Cytoplasm	enzyme
3.526	A_44_P333403	TROAP	trophinin associated protein	Cytoplasm	peptidase
3.522	A_44_P594610	CDCA8	cell division cycle associated 8	Nucleus	other
3.514	A_44_P406805	RFC3	replication factor C subunit 3	Nucleus	enzyme
3.514	A_44_P1022458	TUBB6	tubulin beta 6 class V	Cytoplasm	other
3.509	A_44_P394228	AMDHD2	amidohydrolase domain containing 2	Nucleus	enzyme
3.509	A_44_P730320	ECT2	epithelial cell transforming 2	Cytoplasm	other
3.504	A_42_P799702	AARD	alanine and arginine rich domain containing protein	Other	other
3.492	A_44_P321032	RGD1560281	similar to cell surface receptor FDFACT	Other	other
3.49	A_44_P337300	IL4R	interleukin 4 receptor	Plasma Membrane	transmembrane receptor
3.487	A_42_P457756	PKIB	cAMP-dependent protein kinase inhibitor beta	Other	other
3.48	A_44_P194439	DNAJC9	DnaJ heat shock protein family (Hsp40) member C9	Nucleus	other
3.463	A_44_P312089	NEURL3	neuralized E3 ubiquitin protein ligase 3	Other	enzyme
3.459	A_43_P12125	JUNB	JunB proto-oncogene, AP-1 transcription factor subunit	Nucleus	transcription regulator
3.452	A_44_P1004324	COL18A1	collagen type XVIII alpha 1 chain	Extracellular Space	other
3.452	A_44_P1023801	KIF23	kinesin family member 23	Cytoplasm	other
3.449	A_44_P487425	Anlnl1	anillin, actin binding protein-like 1	Other	other
3.448	A_44_P469584	CD14	CD14 molecule	Plasma Membrane	transmembrane receptor
3.444	A_44_P480285	KIF2C	kinesin family member 2C	Nucleus	other
3.442	A_44_P652447	CXCR6	C-X-C motif chemokine receptor 6	Plasma Membrane	G-protein coupled receptor
3.438	A_44_P478515	FMNL3	formin like 3	Cytoplasm	other
3.436	A_44_P443751	PDPN	podoplanin	Plasma Membrane	other
3.427	A_44_P384506	PRAG1	PEAK1 related kinase activating pseudokinase 1	Nucleus	kinase
3.409	A_44_P1023538	C3	complement C3	Extracellular Space	peptidase
3.407	A_44_P265058	GMNN	geminin, DNA replication inhibitor	Nucleus	transcription regulator
3.407	A_44_P884566	NKAIN1	sodium/potassium transporting ATPase interacting 1	Plasma Membrane	other
3.406	A_42_P678430	CARD9	caspase recruitment domain family member 9	Cytoplasm	other
3.398	A_44_P838888	BRIP1	BRCA1 interacting protein C-terminal helicase 1	Nucleus	enzyme
3.393	A_44_P478114	CDCA2	cell division cycle associated 2	Nucleus	other
3.391	A_44_P1041312	FES	FES proto-oncogene, tyrosine kinase	Cytoplasm	kinase
3.372	A_44_P107653	DIAPH3	diaphanous related formin 3	Cytoplasm	enzyme
3.368	A_44_P540755	Olfr315	olfactory receptor 315	Plasma Membrane	G-protein coupled receptor
3.357	A_44_P777359	C1orf162	chromosome 1 open reading frame 162	Other	transporter
3.356	A_44_P1004757	SERPINB10	serpin family B member 10	Cytoplasm	other
3.353	A_43_P14144	UCK2	uridine-cytidine kinase 2	Cytoplasm	kinase
3.332	A_42_P669544	CPM	carboxypeptidase M	Plasma Membrane	peptidase
3.324	A_43_P11721	SELP	selectin P	Plasma Membrane	transmembrane receptor
3.318	A_42_P745147	BRCA2	BRCA2, DNA repair associated	Nucleus	transcription regulator
3.312	A_44_P241929	MAD2L1	mitotic arrest deficient 2 like 1	Nucleus	other
3.301	A_44_P361000	GRXCR1	glutaredoxin and cysteine rich domain containing 1	Extracellular Space	other
3.295	A_44_P409539	PLOD2	procollagen-lysine,2-oxoglutarate 5-dioxygenase 2	Cytoplasm	enzyme
3.293	A_44_P362749	ADGRE1	adhesion G protein-coupled receptor E1	Plasma Membrane	G-protein coupled receptor
3.289	A_44_P225952	INHBA	inhibin beta A subunit	Extracellular Space	growth factor
3.274	A_42_P635228	DEPDC1B	DEP domain containing 1B	Cytoplasm	other
3.273	A_44_P431150	POLE	DNA polymerase epsilon, catalytic subunit	Nucleus	enzyme
3.271	A_44_P381917	SPHK1	sphingosine kinase 1	Cytoplasm	kinase
3.263	A_44_P1042711	KIF20A	kinesin family member 20A	Cytoplasm	transporter
3.261	A_42_P734868	KCNAB3	potassium voltage-gated channel subfamily A regulatory beta subunit 3	Plasma Membrane	ion channel
3.261	A_42_P592157	PBX2	PBX homeobox 2	Nucleus	other
3.252	A_43_P17424	CHAF1B	chromatin assembly factor 1 subunit B	Nucleus	other
3.249	A_44_P438272	Crisp1/Crisp3	cysteine-rich secretory protein 1	Extracellular Space	other
3.247	A_42_P527141	FOXM1	forkhead box M1	Nucleus	transcription regulator
3.245	A_44_P109608	GSTA1	glutathione S-transferase alpha 1	Cytoplasm	enzyme
3.243	A_44_P325005	PAK1	p21 (RAC1) activated kinase 1	Cytoplasm	kinase
3.231	A_44_P393822	PLEKHO1	pleckstrin homology domain containing O1	Plasma Membrane	other
3.22	A_44_P1019324	EIF4A1	eukaryotic translation initiation factor 4A1	Cytoplasm	translation regulator
3.213	A_43_P12413	CYBA	cytochrome b-245 alpha chain	Cytoplasm	enzyme
3.209	A_44_P309008	KIF11	kinesin family member 11	Nucleus	other
3.208	A_44_P102918	SHCBP1	SHC binding and spindle associated 1	Other	other
3.203	A_44_P532237	FANCA	Fanconi anemia complementation group A	Nucleus	other
3.202	A_42_P758222	ARG1	arginase 1	Cytoplasm	enzyme
3.19	A_44_P261755	IFI30	IFI30, lysosomal thiol reductase	Cytoplasm	enzyme
3.19	A_44_P238927	KIF18A	kinesin family member 18A	Cytoplasm	enzyme
3.189	A_42_P768024	SPN	sialophorin	Plasma Membrane	transmembrane receptor
3.184	A_44_P422356	Trim80	tripartite motif-containing 80	Other	other
3.183	A_42_P752134	KPNA2	karyopherin subunit alpha 2	Nucleus	transporter
3.181	A_44_P149999	C15orf39	chromosome 15 open reading frame 39	Cytoplasm	other
3.178	A_42_P565275	ASPM	abnormal spindle microtubule assembly	Nucleus	other
3.167	A_44_P477650	ADAP2	ArfGAP with dual PH domains 2	Cytoplasm	other
3.166	A_44_P475159	THY1	Thy-1 cell surface antigen	Plasma Membrane	other
3.165	A_43_P17903	C9orf50	chromosome 9 open reading frame 50	Other	other
3.151	A_44_P196146	APLNR	apelin receptor	Plasma Membrane	G-protein coupled receptor
3.149	A_44_P229122	SPAG5	sperm associated antigen 5	Nucleus	peptidase
3.147	A_44_P238978	CDT1	chromatin licensing and DNA replication factor 1	Nucleus	other
3.145	A_44_P506273	NEIL3	nei like DNA glycosylase 3	Nucleus	enzyme
3.144	A_44_P1030098	CDC45	cell division cycle 45	Nucleus	other
3.133	A_44_P129749	Crabp2/LOC100911902	cellular retinoic acid binding protein 2	Cytoplasm	other
3.13	A_44_P337335	CTRC	chymotrypsin C	Extracellular Space	peptidase
3.13	A_44_P513322	TXK	TXK tyrosine kinase	Cytoplasm	kinase
3.123	A_42_P661600	Reg3a	regenerating islet-derived 3 alpha	Extracellular Space	other
3.119	A_44_P158533	Tmsbl1	thymosin beta-like protein 1	Cytoplasm	other
3.108	A_43_P22203	ZFAT	zinc finger and AT-hook domain containing	Nucleus	transcription regulator
3.106	A_44_P175240	CYP7B1	cytochrome P450 family 7 subfamily B member 1	Cytoplasm	enzyme
3.098	A_42_P522899	TGFB1	transforming growth factor beta 1	Extracellular Space	growth factor
3.096	A_43_P20902	DONSON	downstream neighbor of SON	Extracellular Space	other
3.09	A_44_P536780	KCNG2	potassium voltage-gated channel modifier subfamily G member 2	Plasma Membrane	ion channel
3.088	A_44_P177726	GFAP	glial fibrillary acidic protein	Cytoplasm	other
3.082	A_43_P16050	WNT11	Wnt family member 11	Extracellular Space	other
3.079	A_44_P222521	TMEM59L	transmembrane protein 59 like	Cytoplasm	other
3.078	A_44_P426924	MIS18BP1	MIS18 binding protein 1	Nucleus	other
3.076	A_44_P871423	P2RY12	purinergic receptor P2Y12	Plasma Membrane	G-protein coupled receptor
3.073	A_44_P157222	TGIF1	TGFB induced factor homeobox 1	Nucleus	transcription regulator
3.07	A_43_P23108	MCM7	minichromosome maintenance complex component 7	Nucleus	enzyme
3.062	A_44_P455145	PLXNB2	plexin B2	Plasma Membrane	transmembrane receptor
3.058	A_44_P333293	TRABD2B	TraB domain containing 2B	Plasma Membrane	peptidase
3.05	A_44_P1026848	CRYBA4	crystallin beta A4	Other	other
3.049	A_43_P19441	CENPN	centromere protein N	Nucleus	other
3.046	A_43_P12926	CYP27B1	cytochrome P450 family 27 subfamily B member 1	Cytoplasm	enzyme
3.046	A_44_P852545	TMEM196	transmembrane protein 196	Other	other
3.045	A_43_P13109	CYP26A1	cytochrome P450 family 26 subfamily A member 1	Cytoplasm	enzyme
3.042	A_44_P384273	KCNK12	potassium two pore domain channel subfamily K member 12	Plasma Membrane	ion channel
3.039	A_44_P920712	DOCK8	dedicator of cytokinesis 8	Cytoplasm	other
3.038	A_44_P149476	LRCH4	leucine rich repeats and calponin homology domain containing 4	Cytoplasm	transcription regulator
3.033	A_42_P739860	DUSP5	dual specificity phosphatase 5	Nucleus	phosphatase
3.018	A_43_P16771	GOLM1	golgi membrane protein 1	Cytoplasm	other
3.001	A_44_P295680	CNN2	calponin 2	Cytoplasm	other
2.994	A_44_P824731	SGO1	shugoshin 1	Nucleus	other
2.989	A_44_P149916	ZNF275	zinc finger protein 275	Nucleus	other
2.985	A_44_P161550	ATP8B4	ATPase phospholipid transporting 8B4 (putative)	Plasma Membrane	transporter
2.983	A_44_P1020967	NSD2	nuclear receptor binding SET domain protein 2	Nucleus	enzyme
2.981	A_42_P801831	FBLN1	fibulin 1	Extracellular Space	other
2.975	A_44_P550497	BID	BH3 interacting domain death agonist	Cytoplasm	other
2.974	A_44_P337691	MFSD1	major facilitator superfamily domain containing 1	Other	transporter
2.969	A_44_P435782	CIITA	class II major histocompatibility complex transactivator	Nucleus	transcription regulator
2.969	A_42_P520349	CLEC10A	C-type lectin domain containing 10A	Plasma Membrane	other
2.968	A_44_P777173	NPL	N-acetylneuraminate pyruvate lyase	Cytoplasm	enzyme
2.963	A_44_P870562	TMEM144	transmembrane protein 144	Other	other
2.948	A_44_P501898	CHTF18	chromosome transmission fidelity factor 18	Nucleus	other
2.947	A_44_P633041	LPAR4	lysophosphatidic acid receptor 4	Plasma Membrane	transmembrane receptor
2.946	A_44_P463805	CD247	CD247 molecule	Plasma Membrane	transmembrane receptor
2.945	A_44_P126085	MAP4K1	mitogen-activated protein kinase kinase kinase kinase 1	Cytoplasm	kinase
2.944	A_42_P757258	KIF20B	kinesin family member 20B	Nucleus	enzyme
2.939	A_42_P809101	TCTEX1D1	Tctex1 domain containing 1	Other	other
2.932	A_42_P794130	CDC20	cell division cycle 20	Nucleus	other
2.93	A_42_P772136	FAM60A	family with sequence similarity 60 member A	Extracellular Space	other
2.93	A_44_P881475	PLIN2	perilipin 2	Plasma Membrane	other
2.914	A_44_P180795	SPDL1	spindle apparatus coiled-coil protein 1	Nucleus	other
2.899	A_44_P849046	RAB32	RAB32, member RAS oncogene family	Cytoplasm	enzyme
2.897	A_43_P12257	ESM1	endothelial cell specific molecule 1	Extracellular Space	growth factor
2.886	A_44_P808277	Ptk7	protein tyrosine kinase 7	Plasma Membrane	other
2.879	A_44_P258773	FADD	Fas associated via death domain	Cytoplasm	other
2.877	A_44_P443349	1700009N14Rik	RIKEN cDNA 1700009N14 gene	Other	transporter
2.869	A_43_P18802	PASK	PAS domain containing serine/threonine kinase	Cytoplasm	kinase
2.869	A_44_P358883	ZNF831	zinc finger protein 831	Other	other
2.866	A_44_P1001914	CCDC93	coiled-coil domain containing 93	Extracellular Space	other
2.864	A_44_P994385	CDHR5	cadherin related family member 5	Plasma Membrane	other
2.863	A_44_P853326	MEX3A	mex-3 RNA binding family member A	Cytoplasm	other
2.856	A_44_P140669	ABI3	ABI family member 3	Plasma Membrane	other
2.856	A_44_P342047	RGS10	regulator of G protein signaling 10	Cytoplasm	other
2.853	A_44_P415269	RHBDF2	rhomboid 5 homolog 2	Cytoplasm	other
2.835	A_42_P805300	GPX1	glutathione peroxidase 1	Cytoplasm	enzyme
2.831	A_44_P1006261	NME4	NME/NM23 nucleoside diphosphate kinase 4	Cytoplasm	kinase
2.83	A_44_P478066	INCENP	inner centromere protein	Nucleus	other
2.829	A_44_P297525	PMF1/PMF1-BGLAP	polyamine modulated factor 1	Nucleus	transcription regulator
2.821	A_44_P424135	MS4A3	membrane spanning 4-domains A3	Plasma Membrane	other
2.811	A_44_P184484	ORC1	origin recognition complex subunit 1	Nucleus	other
2.8	A_42_P685287	FXYD5	FXYD domain containing ion transport regulator 5	Plasma Membrane	ion channel
2.8	A_44_P291175	NDC80	NDC80, kinetochore complex component	Nucleus	other
2.795	A_44_P126027	PFKFB4	6-phosphofructo-2-kinase/fructose-2,6-biphosphatase 4	Cytoplasm	kinase
2.792	A_43_P12404	Evl	Enah/Vasp-like	Plasma Membrane	other
2.788	A_44_P943756	CCDC82	coiled-coil domain containing 82	Other	other
2.786	A_42_P799208	CHST11	carbohydrate sulfotransferase 11	Cytoplasm	enzyme
2.783	A_44_P428487	GUSB	glucuronidase beta	Cytoplasm	enzyme
2.782	A_44_P363647	EZH2	enhancer of zeste 2 polycomb repressive complex 2 subunit	Nucleus	transcription regulator
2.778	A_43_P23023	PPP1R18	protein phosphatase 1 regulatory subunit 18	Other	other
2.775	A_44_P562251	NCAPG2	non-SMC condensin II complex subunit G2	Nucleus	other
2.772	A_42_P752796	ME2	malic enzyme 2	Cytoplasm	enzyme
2.772	A_42_P547856	PRKCB	protein kinase C beta	Cytoplasm	kinase
2.771	A_44_P678814	OLFML2A	olfactomedin like 2A	Extracellular Space	other
2.765	A_43_P23040	Pqlc2	PQ loop repeat containing 2	Cytoplasm	transporter
2.762	A_43_P22402	FBXO5	F-box protein 5	Nucleus	enzyme
2.761	A_44_P964460	ITK	IL2 inducible T-cell kinase	Cytoplasm	kinase
2.757	A_44_P383679	CTSD	cathepsin D	Cytoplasm	peptidase
2.755	A_44_P199447	ELK3	ELK3, ETS transcription factor	Nucleus	transcription regulator
2.745	A_43_P16533	RNASET2	ribonuclease T2	Cytoplasm	enzyme
2.738	A_44_P764517	SLC4A7	solute carrier family 4 member 7	Plasma Membrane	transporter
2.737	A_44_P108304	SLC41A2	solute carrier family 41 member 2	Plasma Membrane	transporter
2.733	A_44_P555399	FIGNL1	fidgetin like 1	Nucleus	enzyme
2.72	A_44_P203195	MADD	MAP kinase activating death domain	Cytoplasm	other
2.717	A_44_P148161	RRM1	ribonucleotide reductase catalytic subunit M1	Nucleus	enzyme
2.717	A_43_P11676	TFF3	trefoil factor 3	Extracellular Space	other
2.715	A_44_P367688	HLA-DRA	major histocompatibility complex, class II, DR alpha	Plasma Membrane	transmembrane receptor
2.698	A_44_P426608	WDHD1	WD repeat and HMG-box DNA binding protein 1	Nucleus	other
2.695	A_44_P744814	Hnrnpa3	heterogeneous nuclear ribonucleoprotein A3	Nucleus	transporter
2.693	A_44_P376900	GPR171	G protein-coupled receptor 171	Plasma Membrane	G-protein coupled receptor
2.692	A_44_P513360	Cdkn3	cyclin-dependent kinase inhibitor 3	Cytoplasm	phosphatase
2.69	A_44_P380300	TONSL	tonsoku like, DNA repair protein	Cytoplasm	transcription regulator
2.689	A_43_P11499	RBP2	retinol binding protein 2	Cytoplasm	transporter
2.686	A_44_P229376	SDAD1	SDA1 domain containing 1	Nucleus	other
2.679	A_44_P550203	UGGT1	UDP-glucose glycoprotein glucosyltransferase 1	Cytoplasm	enzyme
2.674	A_44_P438815	CMTM7	CKLF like MARVEL transmembrane domain containing 7	Extracellular Space	cytokine
2.671	A_43_P21085	KLHL2	kelch like family member 2	Cytoplasm	other
2.66	A_42_P586256	Prim1	primase (DNA) subunit 1	Other	other
2.659	A_44_P174278	BHLHE22	basic helix-loop-helix family member e22	Nucleus	transcription regulator
2.654	A_44_P504019	ATP6AP2	ATPase H+ transporting accessory protein 2	Cytoplasm	transporter
2.652	A_42_P810736	TIMELESS	timeless circadian clock	Nucleus	other
2.651	A_44_P304009	FAM111A	family with sequence similarity 111 member A	Nucleus	other
2.65	A_44_P123887	SMC4	structural maintenance of chromosomes 4	Nucleus	transporter
2.643	A_44_P455038	MAN1C1	mannosidase alpha class 1C member 1	Cytoplasm	enzyme
2.641	A_44_P384086	KCNC3	potassium voltage-gated channel subfamily C member 3	Plasma Membrane	ion channel
2.641	A_42_P545721	Snrpe	small nuclear ribonucleoprotein E	Nucleus	other
2.637	A_44_P556528	EMILIN1	elastin microfibril interfacer 1	Extracellular Space	other
2.633	A_44_P338137	CCT6A	chaperonin containing TCP1 subunit 6A	Cytoplasm	other
2.625	A_44_P898436	LRRC17	leucine rich repeat containing 17	Extracellular Space	other
2.621	A_44_P168184	Rasl2-9	RAS-like, family 2, locus 9	Nucleus	transporter
2.618	A_44_P470884	PRC1	protein regulator of cytokinesis 1	Nucleus	other
2.614	A_44_P190568	CD83	CD83 molecule	Plasma Membrane	transmembrane receptor
2.614	A_44_P100443	UNG	uracil DNA glycosylase	Nucleus	enzyme
2.613	A_44_P442359	CHI3L1	chitinase 3 like 1	Extracellular Space	enzyme
2.611	A_44_P251706	SLC1A1	solute carrier family 1 member 1	Plasma Membrane	transporter
2.592	A_43_P20319	DBF4	DBF4 zinc finger	Nucleus	kinase
2.579	A_44_P831755	CCER1	coiled-coil glutamate rich protein 1	Other	other
2.576	A_42_P473467	CD276	CD276 molecule	Plasma Membrane	other
2.566	A_44_P273509	TIMP1	TIMP metallopeptidase inhibitor 1	Extracellular Space	cytokine
2.565	A_44_P533786	AURKB	aurora kinase B	Nucleus	kinase
2.564	A_44_P532473	TRAIP	TRAF interacting protein	Cytoplasm	enzyme
2.562	A_44_P130333	MMP11	matrix metallopeptidase 11	Extracellular Space	peptidase
2.561	A_44_P411771	HYLS1	HYLS1, centriolar and ciliogenesis associated	Nucleus	other
2.554	A_44_P107634	HAUS4	HAUS augmin like complex subunit 4	Cytoplasm	other
2.552	A_43_P15524	CCND3	cyclin D3	Nucleus	kinase
2.55	A_44_P294650	BRCA1	BRCA1, DNA repair associated	Nucleus	transcription regulator
2.55	A_42_P475885	PTPRZ1	protein tyrosine phosphatase, receptor type Z1	Plasma Membrane	phosphatase
2.542	A_44_P240953	FURIN	furin, paired basic amino acid cleaving enzyme	Cytoplasm	peptidase
2.537	A_44_P267041	LAT	linker for activation of T-cells	Plasma Membrane	other
2.535	A_44_P386792	KIF26B	kinesin family member 26B	Other	other
2.529	A_43_P13111	SKAP2	src kinase associated phosphoprotein 2	Cytoplasm	other
2.529	A_44_P402641	UGT1A3	UDP glucuronosyltransferase family 1 member A3	Cytoplasm	enzyme
2.523	A_42_P598934	Lrrfip1	LRR binding FLII interacting protein 1	Other	other
2.521	A_44_P988451	H2AFX	H2A histone family member X	Nucleus	transcription regulator
2.518	A_44_P530813	CASP3	caspase 3	Cytoplasm	peptidase
2.516	A_44_P187167	TUBB2B	tubulin beta 2B class IIb	Cytoplasm	other
2.504	A_44_P526975	CCHCR1	coiled-coil alpha-helical rod protein 1	Cytoplasm	other
2.497	A_42_P552143	CFL1	cofilin 1	Nucleus	other
2.495	A_44_P465931	CLIC1	chloride intracellular channel 1	Nucleus	ion channel
2.495	A_44_P1008867	NETO2	neuropilin and tolloid like 2	Plasma Membrane	other
2.492	A_44_P166495	RANGAP1	Ran GTPase activating protein 1	Nucleus	other
2.49	A_44_P215459	ITGA10	integrin subunit alpha 10	Plasma Membrane	other
2.488	A_44_P156949	RTKN2	rhotekin 2	Plasma Membrane	other
2.484	A_44_P428507	NFKBIE	NFKB inhibitor epsilon	Nucleus	transcription regulator
2.483	A_43_P15701	RAB13	RAB13, member RAS oncogene family	Plasma Membrane	enzyme
2.482	A_44_P373012	ARHGEF39	Rho guanine nucleotide exchange factor 39	Plasma Membrane	other
2.476	A_42_P640700	TMEM176A	transmembrane protein 176A	Other	other
2.474	A_44_P157721	HSPA8	heat shock protein family A (Hsp70) member 8	Cytoplasm	enzyme
2.474	A_44_P484909	P2RX4	purinergic receptor P2X 4	Plasma Membrane	ion channel
2.47	A_44_P739541	CXCL6	C-X-C motif chemokine ligand 6	Extracellular Space	cytokine
2.47	A_43_P11654	PNOC	prepronociceptin	Extracellular Space	other
2.468	A_44_P352123	CENPQ	centromere protein Q	Nucleus	other
2.468	A_44_P548203	RBM3	RNA binding motif (RNP1, RRM) protein 3	Cytoplasm	other
2.467	A_44_P263159	MID1	midline 1	Nucleus	other
2.461	A_44_P179811	TENM3	teneurin transmembrane protein 3	Plasma Membrane	other
2.461	A_44_P278439	UBE2N	ubiquitin conjugating enzyme E2 N	Cytoplasm	enzyme
2.457	A_44_P1028858	GRN	granulin precursor	Extracellular Space	growth factor
2.453	A_42_P586141	PLCD1	phospholipase C delta 1	Cytoplasm	enzyme
2.451	A_44_P351209	PHLDA1	pleckstrin homology like domain family A member 1	Cytoplasm	other
2.448	A_44_P433349	CDK5RAP2	CDK5 regulatory subunit associated protein 2	Cytoplasm	other
2.447	A_44_P200507	KHDRBS1	KH RNA binding domain containing, signal transduction associated 1	Nucleus	transcription regulator
2.444	A_44_P507194	GPC1	glypican 1	Plasma Membrane	transmembrane receptor
2.438	A_44_P883477	NCAPD2	non-SMC condensin I complex subunit D2	Nucleus	other
2.437	A_42_P829863	GALK1	galactokinase 1	Cytoplasm	kinase
2.43	A_42_P467630	SLC22A1	solute carrier family 22 member 1	Plasma Membrane	transporter
2.426	A_44_P238222	SLC1A5	solute carrier family 1 member 5	Plasma Membrane	transporter
2.423	A_42_P524707	PRIM2	primase (DNA) subunit 2	Nucleus	enzyme
2.412	A_44_P264915	B4GALNT4	beta-1,4-N-acetyl-galactosaminyltransferase 4	Extracellular Space	enzyme
2.412	A_42_P615374	C1QTNF5	C1q and TNF related 5	Plasma Membrane	transmembrane receptor
2.412	A_44_P202940	LOC100909630/RT1-DMb	RT1 class II, locus DMb	Cytoplasm	other
2.408	A_44_P635138	MRC1	mannose receptor C-type 1	Plasma Membrane	transmembrane receptor
2.404	A_42_P649672	SV2A	synaptic vesicle glycoprotein 2A	Cytoplasm	transporter
2.401	A_44_P301608	UCP2	uncoupling protein 2	Cytoplasm	transporter
2.398	A_44_P112622	SMARCE1	SWI/SNF related, matrix associated, actin dependent regulator of chromatin, subfamily e, member 1	Nucleus	transcription regulator
2.398	A_44_P438822	SPATS2	spermatogenesis associated serine rich 2	Cytoplasm	other
2.396	A_44_P388782	CDK4	cyclin dependent kinase 4	Nucleus	kinase
2.395	A_42_P453737	PCDH17	protocadherin 17	Plasma Membrane	other
2.393	A_44_P149114	ATP6V1B2	ATPase H+ transporting V1 subunit B2	Cytoplasm	transporter
2.391	A_44_P435059	Hmgb3	high mobility group box 3	Nucleus	other
2.388	A_44_P112428	CHAF1A	chromatin assembly factor 1 subunit A	Nucleus	other
2.38	A_44_P261720	RGD1563351	RGD1563351	Other	other
2.379	A_43_P21520	LRP8	LDL receptor related protein 8	Plasma Membrane	transmembrane receptor
2.379	A_44_P775787	Tstd3	thiosulfate sulfurtransferase (rhodanese)-like domain containing 3	Other	other
2.378	A_44_P787936	STAT3	signal transducer and activator of transcription 3	Nucleus	transcription regulator
2.376	A_44_P132533	RFC4	replication factor C subunit 4	Nucleus	other
2.376	A_44_P508239	SHMT1	serine hydroxymethyltransferase 1	Cytoplasm	enzyme
2.376	A_44_P731007	SPECC1	sperm antigen with calponin homology and coiled-coil domains 1	Nucleus	other
2.374	A_44_P669786	Fam78b	family with sequence similarity 78, member B	Other	other
2.373	A_44_P918267	MCPH1	microcephalin 1	Nucleus	other
2.371	A_44_P728469	PTER	phosphotriesterase related	Cytoplasm	enzyme
2.369	A_42_P679148	PCDHAC2	protocadherin alpha subfamily C, 2	Plasma Membrane	other
2.368	A_44_P156361	Olfr1231	olfactory receptor 1231	Plasma Membrane	G-protein coupled receptor
2.367	A_44_P1002336	MDFIC	MyoD family inhibitor domain containing	Nucleus	other
2.363	A_44_P645452	LOC102552770	uncharacterized LOC102552770	Other	other
2.359	A_44_P508554	NCF2	neutrophil cytosolic factor 2	Cytoplasm	enzyme
2.355	A_44_P508945	HEYL	hes related family bHLH transcription factor with YRPW motif-like	Nucleus	transcription regulator
2.351	A_43_P13363	TMEM37	transmembrane protein 37	Plasma Membrane	ion channel
2.349	A_42_P606126	MMP13	matrix metallopeptidase 13	Extracellular Space	peptidase
2.347	A_43_P16181	H2-Eb2	histocompatibility 2, class II antigen E beta2	Other	other
2.347	A_44_P1017415	WDR43	WD repeat domain 43	Nucleus	other
2.344	A_44_P344346	ARPC1B	actin related protein 2/3 complex subunit 1B	Cytoplasm	other
2.344	A_44_P304387	HAAO	3-hydroxyanthranilate 3,4-dioxygenase	Cytoplasm	enzyme
2.344	A_44_P325744	NAP1L1	nucleosome assembly protein 1 like 1	Nucleus	other
2.342	A_43_P22174	WDR1	WD repeat domain 1	Extracellular Space	other
2.341	A_44_P1019036	POC1A	POC1 centriolar protein A	Cytoplasm	peptidase
2.341	A_44_P330675	UBTD1	ubiquitin domain containing 1	Other	other
2.339	A_44_P104069	NHP2	NHP2 ribonucleoprotein	Nucleus	other
2.337	A_43_P12850	TNFSF4	TNF superfamily member 4	Extracellular Space	cytokine
2.335	A_44_P538921	Cetn4	centrin 4	Other	other
2.332	A_42_P505241	QPRT	quinolinate phosphoribosyltransferase	Cytoplasm	enzyme
2.331	A_42_P465601	MYH10	myosin heavy chain 10	Cytoplasm	enzyme
2.328	A_44_P825753	ARRB1	arrestin beta 1	Cytoplasm	other
2.328	A_44_P886495	SPRED1	sprouty related EVH1 domain containing 1	Plasma Membrane	other
2.327	A_43_P12296	DIO2	iodothyronine deiodinase 2	Cytoplasm	enzyme
2.326	A_44_P405793	NPAS2	neuronal PAS domain protein 2	Nucleus	transcription regulator
2.325	A_44_P975437	CLDN4	claudin 4	Plasma Membrane	transmembrane receptor
2.32	A_44_P431488	LOC103690888	60S ribosomal protein L10a-like	Other	other
2.32	A_44_P418942	MYO7A	myosin VIIA	Cytoplasm	enzyme
2.319	A_44_P160888	PPP1R14B	protein phosphatase 1 regulatory inhibitor subunit 14B	Cytoplasm	phosphatase
2.315	A_44_P189299	CCND1	cyclin D1	Nucleus	transcription regulator
2.314	A_44_P349002	E2F1	E2F transcription factor 1	Nucleus	transcription regulator
2.314	A_44_P487492	SSBP4	single stranded DNA binding protein 4	Nucleus	transcription regulator
2.311	A_44_P217604	MSH2	mutS homolog 2	Nucleus	enzyme
2.308	A_44_P100886	CEP295	centrosomal protein 295	Cytoplasm	other
2.29	A_44_P1007831	ZNF710	zinc finger protein 710	Nucleus	other
2.288	A_44_P137448	PTGS1	prostaglandin-endoperoxide synthase 1	Cytoplasm	enzyme
2.28	A_44_P265366	ESPL1	extra spindle pole bodies like 1, separase	Nucleus	peptidase
2.28	A_43_P18895	SORCS2	sortilin related VPS10 domain containing receptor 2	Plasma Membrane	transporter
2.277	A_42_P479348	HHIPL1	HHIP like 1	Other	other
2.277	A_44_P248133	TAGLN2	transgelin 2	Cytoplasm	other
2.276	A_44_P125681	DNMT1	DNA methyltransferase 1	Nucleus	enzyme
2.276	A_44_P423281	ETV4	ETS variant 4	Nucleus	transcription regulator
2.276	A_44_P1009757	IL1RAP	interleukin 1 receptor accessory protein	Plasma Membrane	transmembrane receptor
2.273	A_44_P619150	KPNB1	karyopherin subunit beta 1	Nucleus	transporter
2.271	A_42_P638128	ACTG2	actin, gamma 2, smooth muscle, enteric	Cytoplasm	other
2.27	A_44_P178519	ADAMTS7	ADAM metallopeptidase with thrombospondin type 1 motif 7	Extracellular Space	peptidase
2.26	A_44_P485388	CHD7	chromodomain helicase DNA binding protein 7	Nucleus	enzyme
2.26	A_44_P370229	FAM20C	FAM20C, golgi associated secretory pathway kinase	Extracellular Space	enzyme
2.259	A_44_P306993	LDLRAD4	low density lipoprotein receptor class A domain containing 4	Cytoplasm	other
2.259	A_44_P428535	OR9I1	olfactory receptor family 9 subfamily I member 1	Plasma Membrane	G-protein coupled receptor
2.258	A_44_P677285	Abcg3l2	ATP-binding cassette, subfamily G (WHITE), member 3-like 2	Other	other
2.258	A_44_P177931	Anapc15	anaphase prompoting complex C subunit 15	Nucleus	other
2.252	A_42_P687443	RAMP3	receptor activity modifying protein 3	Plasma Membrane	transporter
2.249	A_44_P1025102	PLSCR1	phospholipid scramblase 1	Plasma Membrane	enzyme
2.248	A_44_P557154	SMIM3	small integral membrane protein 3	Other	ion channel
2.246	A_44_P468193	MXD3	MAX dimerization protein 3	Nucleus	transcription regulator
2.245	A_44_P597380	LOC100910286	uncharacterized LOC100910286	Other	other
2.241	A_44_P404836	CP	ceruloplasmin	Extracellular Space	enzyme
2.241	A_44_P365240	PTPN2	protein tyrosine phosphatase, non-receptor type 2	Cytoplasm	phosphatase
2.23	A_44_P524299	DUT	deoxyuridine triphosphatase	Nucleus	enzyme
2.228	A_44_P473314	BORA	bora, aurora kinase A activator	Cytoplasm	other
2.228	A_44_P337843	GSAP	gamma-secretase activating protein	Cytoplasm	peptidase
2.226	A_42_P594613	DUSP6	dual specificity phosphatase 6	Cytoplasm	phosphatase
2.226	A_44_P1040685	IER5L	immediate early response 5 like	Other	other
2.224	A_44_P380332	Cyfip2	cytoplasmic FMR1 interacting protein 2	Cytoplasm	other
2.224	A_44_P242756	PCNA	proliferating cell nuclear antigen	Nucleus	enzyme
2.223	A_44_P151574	Olr1401	olfactory receptor 1401	Other	other
2.219	A_44_P458570	FUT4	fucosyltransferase 4	Cytoplasm	enzyme
2.217	A_44_P500803	HLA-DQB1	major histocompatibility complex, class II, DQ beta 1	Plasma Membrane	other
2.206	A_44_P441339	PHYHD1	phytanoyl-CoA dioxygenase domain containing 1	Other	other
2.204	A_44_P322828	DKK3	dickkopf WNT signaling pathway inhibitor 3	Extracellular Space	cytokine
2.204	A_43_P17762	IL4I1	interleukin 4 induced 1	Cytoplasm	enzyme
2.199	A_44_P492723	ARHGAP8/PRR5-ARHGAP8	Rho GTPase activating protein 8	Cytoplasm	other
2.197	A_44_P404898	ESPN	espin	Cytoplasm	other
2.191	A_44_P121177	Tpm3	tropomyosin 3	Cytoplasm	other
2.19	A_44_P1047158	TNIP2	TNFAIP3 interacting protein 2	Cytoplasm	other
2.189	A_43_P19998	Mtap	methylthioadenosine phosphorylase	Cytoplasm	enzyme
2.188	A_44_P637734	DDX11	DEAD/H-box helicase 11	Cytoplasm	enzyme
2.187	A_44_P433259	SIPA1	signal-induced proliferation-associated 1	Cytoplasm	other
2.182	A_44_P477620	PLA2G4A	phospholipase A2 group IVA	Cytoplasm	enzyme
2.181	A_44_P577978	SLC39A14	solute carrier family 39 member 14	Plasma Membrane	transporter
2.179	A_44_P177425	CREB1	cAMP responsive element binding protein 1	Nucleus	transcription regulator
2.177	A_44_P515197	CXCL3	C-X-C motif chemokine ligand 3	Extracellular Space	cytokine
2.177	A_44_P827421	OTUD3	OTU deubiquitinase 3	Cytoplasm	peptidase
2.176	A_44_P251081	TTYH2	tweety family member 2	Other	ion channel
2.175	A_44_P168986	RGD1562415	similar to 40S ribosomal protein S26	Other	other
2.174	A_44_P483238	HOXC5	homeobox C5	Nucleus	transcription regulator
2.172	A_43_P15416	FAT3	FAT atypical cadherin 3	Plasma Membrane	other
2.172	A_44_P405203	HEBP2	heme binding protein 2	Cytoplasm	other
2.172	A_42_P507566	TNFAIP2	TNF alpha induced protein 2	Extracellular Space	other
2.17	A_44_P1035071	NMT2	N-myristoyltransferase 2	Cytoplasm	enzyme
2.168	A_44_P501277	NECTIN1	nectin cell adhesion molecule 1	Plasma Membrane	other
2.167	A_44_P940553	BEND6	BEN domain containing 6	Nucleus	transcription regulator
2.167	A_44_P100913	ZWILCH	zwilch kinetochore protein	Nucleus	other
2.166	A_44_P990937	SMARCA4	SWI/SNF related, matrix associated, actin dependent regulator of chromatin, subfamily a, member 4	Nucleus	transcription regulator
2.166	A_42_P641234	SNRPA	small nuclear ribonucleoprotein polypeptide A	Nucleus	other
2.165	A_44_P288756	RGD1565117	similar to 40S ribosomal protein S26	Other	other
2.164	A_43_P13685	AHNAK2	AHNAK nucleoprotein 2	Cytoplasm	other
2.163	A_42_P659682	NAV2	neuron navigator 2	Nucleus	other
2.158	A_44_P219972	NT5E	5'-nucleotidase ecto	Plasma Membrane	phosphatase
2.157	A_42_P541872	B3GALNT1	beta-1,3-N-acetylgalactosaminyltransferase 1 (globoside blood group)	Cytoplasm	enzyme
2.155	A_44_P210568	FN1	fibronectin 1	Extracellular Space	enzyme
2.154	A_44_P220256	PRTFDC1	phosphoribosyl transferase domain containing 1	Cytoplasm	enzyme
2.153	A_44_P417595	DNAI2	dynein axonemal intermediate chain 2	Cytoplasm	other
2.153	A_44_P896602	RAD18	RAD18, E3 ubiquitin protein ligase	Nucleus	other
2.151	A_44_P140051	AP1S1	adaptor related protein complex 1 sigma 1 subunit	Cytoplasm	transporter
2.151	A_44_P792621	TMEM63A	transmembrane protein 63A	Cytoplasm	other
2.148	A_44_P479216	HS6ST1	heparan sulfate 6-O-sulfotransferase 1	Plasma Membrane	enzyme
2.141	A_44_P1056788	SDF2L1	stromal cell derived factor 2 like 1	Cytoplasm	other
2.14	A_44_P958650	ISY1-RAB43	ISY1-RAB43 readthrough	Nucleus	other
2.139	A_44_P480636	DDX19A	DEAD-box helicase 19A	Nucleus	enzyme
2.139	A_42_P783292	H2AFY	H2A histone family member Y	Nucleus	other
2.138	A_44_P351490	CD82	CD82 molecule	Plasma Membrane	other
2.136	A_44_P412647	GINS2	GINS complex subunit 2	Nucleus	other
2.136	A_44_P283921	TMEM26	transmembrane protein 26	Other	other
2.133	A_44_P363156	HNRNPD	heterogeneous nuclear ribonucleoprotein D	Nucleus	transcription regulator
2.127	A_43_P12698	LGALS3	galectin 3	Extracellular Space	other
2.127	A_44_P682439	PRCP	prolylcarboxypeptidase	Cytoplasm	peptidase
2.125	A_42_P763077	AQP2	aquaporin 2	Plasma Membrane	transporter
2.12	A_44_P479131	CDKN2C	cyclin dependent kinase inhibitor 2C	Nucleus	transcription regulator
2.116	A_43_P15292	CTSB	cathepsin B	Cytoplasm	peptidase
2.113	A_44_P1038266	FKBP15	FK506 binding protein 15	Plasma Membrane	enzyme
2.112	A_44_P744519	NPM1	nucleophosmin	Nucleus	transcription regulator
2.109	A_44_P147062	MOXD1	monooxygenase DBH like 1	Cytoplasm	enzyme
2.107	A_42_P567527	TRAF4	TNF receptor associated factor 4	Cytoplasm	other
2.106	A_44_P1004150	VRK1	vaccinia related kinase 1	Nucleus	kinase
2.105	A_43_P11370	PLP2	proteolipid protein 2	Cytoplasm	transporter
2.103	A_44_P363116	Cxcl3	chemokine (C-X-C motif) ligand 3	Extracellular Space	cytokine
2.103	A_44_P607121	LHFPL2	lipoma HMGIC fusion partner-like 2	Other	enzyme
2.101	A_44_P154176	Zim1	zinc finger, imprinted 1	Nucleus	other
2.097	A_44_P286853	AKT3	AKT serine/threonine kinase 3	Cytoplasm	kinase
2.093	A_42_P753215	SYNJ2	synaptojanin 2	Cytoplasm	phosphatase
2.088	A_44_P1040889	CPSF6	cleavage and polyadenylation specific factor 6	Nucleus	other
2.088	A_44_P447623	UGDH	UDP-glucose 6-dehydrogenase	Nucleus	enzyme
2.087	A_43_P11537	RBP1	retinol binding protein 1	Extracellular Space	transporter
2.085	A_44_P558157	EFHC1	EF-hand domain containing 1	Cytoplasm	other
2.082	A_44_P116316	AP1B1	adaptor related protein complex 1 beta 1 subunit	Cytoplasm	transporter
2.081	A_44_P513530	FAM83D	family with sequence similarity 83 member D	Cytoplasm	other
2.077	A_44_P395709	RAC1	ras-related C3 botulinum toxin substrate 1 (rho family, small GTP binding protein Rac1)	Plasma Membrane	enzyme
2.076	A_44_P976153	PTPRJ	protein tyrosine phosphatase, receptor type J	Plasma Membrane	phosphatase
2.074	A_44_P364672	CTSA	cathepsin A	Cytoplasm	peptidase
2.072	A_44_P438193	AP2A2	adaptor related protein complex 2 alpha 2 subunit	Cytoplasm	transporter
2.069	A_44_P201379	LDB1	LIM domain binding 1	Nucleus	transcription regulator
2.069	A_44_P683382	TMEM202	transmembrane protein 202	Other	other
2.064	A_44_P367486	LIG1	DNA ligase 1	Nucleus	enzyme
2.061	A_44_P338970	PLD1	phospholipase D1	Cytoplasm	enzyme
2.06	A_44_P438539	CSRNP3	cysteine and serine rich nuclear protein 3	Nucleus	transcription regulator
2.058	A_43_P13417	FZD2	frizzled class receptor 2	Plasma Membrane	G-protein coupled receptor
2.056	A_44_P775118	TMEM123	transmembrane protein 123	Plasma Membrane	other
2.054	A_44_P358028	NT5C	5', 3'-nucleotidase, cytosolic	Cytoplasm	phosphatase
2.054	A_44_P229501	RHOC	ras homolog family member C	Plasma Membrane	enzyme
2.047	A_42_P728794	SRPX2	sushi repeat containing protein, X-linked 2	Cytoplasm	other
2.046	A_43_P11116	Prss30	protease, serine 30	Plasma Membrane	peptidase
2.042	A_44_P423880	RFC2	replication factor C subunit 2	Nucleus	other
2.041	A_44_P637792	CBFB	core-binding factor beta subunit	Nucleus	transcription regulator
2.041	A_44_P513059	SFRP1	secreted frizzled related protein 1	Plasma Membrane	transmembrane receptor
2.039	A_43_P18256	C16orf59	chromosome 16 open reading frame 59	Other	other
2.039	A_44_P1037892	Slc25a13	solute carrier family 25 member 13	Cytoplasm	transporter
2.038	A_44_P278562	MTFR2	mitochondrial fission regulator 2	Cytoplasm	other
2.032	A_44_P241258	FRRS1	ferric chelate reductase 1	Plasma Membrane	transmembrane receptor
2.027	A_44_P946460	OSBPL3	oxysterol binding protein like 3	Cytoplasm	transporter
2.025	A_44_P1019710	SLC39A6	solute carrier family 39 member 6	Plasma Membrane	transporter
2.024	A_44_P356047	Hnrnpab	heterogeneous nuclear ribonucleoprotein A/B	Nucleus	other
2.022	A_44_P973249	ITGAV	integrin subunit alpha V	Plasma Membrane	transmembrane receptor
2.021	A_44_P545945	FRMD8	FERM domain containing 8	Other	other
2.021	A_44_P519620	LITAF	lipopolysaccharide induced TNF factor	Nucleus	transcription regulator
2.021	A_44_P221077	TMEM100	transmembrane protein 100	Plasma Membrane	other
2.014	A_44_P171440	APOE	apolipoprotein E	Extracellular Space	transporter
2.014	A_44_P480361	CENPL	centromere protein L	Cytoplasm	other
2.013	A_43_P13069	CHEK1	checkpoint kinase 1	Nucleus	kinase
2.012	A_43_P11580	ABCC2	ATP binding cassette subfamily C member 2	Plasma Membrane	transporter
2.006	A_44_P540910	CASP6	caspase 6	Cytoplasm	peptidase
2.006	A_44_P756335	RBM26	RNA binding motif protein 26	Other	other
2.005	A_42_P671442	PRELID1	PRELI domain containing 1	Cytoplasm	other
2.005	A_42_P516379	SYNPO	synaptopodin	Cytoplasm	other
-2.004	A_44_P976703	LIFR	LIF receptor alpha	Plasma Membrane	transmembrane receptor
-2.005	A_44_P505180	KIF5B	kinesin family member 5B	Cytoplasm	other
-2.006	A_43_P17743	PIR	pirin	Nucleus	transcription regulator
-2.008	A_44_P624624	ESYT3	extended synaptotagmin 3	Plasma Membrane	other
-2.009	A_44_P203797	Nr1h5	nuclear receptor subfamily 1, group H, member 5	Other	other
-2.014	A_43_P12085	Dbil5	diazepam binding inhibitor-like 5	Cytoplasm	other
-2.019	A_44_P418944	ENTPD5	ectonucleoside triphosphate diphosphohydrolase 5	Cytoplasm	enzyme
-2.02	A_44_P286259	FBXL4	F-box and leucine rich repeat protein 4	Nucleus	enzyme
-2.024	A_42_P747450	RORA	RAR related orphan receptor A	Nucleus	ligand-dependent nuclear receptor
-2.025	A_43_P13381	POMC	proopiomelanocortin	Extracellular Space	other
-2.028	A_44_P1013472	GXYLT1	glucoside xylosyltransferase 1	Cytoplasm	enzyme
-2.029	A_44_P977988	LOC103692581	uncharacterized LOC103692581	Other	other
-2.031	A_43_P12275	NAT8	N-acetyltransferase 8 (putative)	Nucleus	transcription regulator
-2.032	A_42_P666809	SSBP2	single stranded DNA binding protein 2	Nucleus	transcription regulator
-2.034	A_44_P1037364	ATP9A	ATPase phospholipid transporting 9A (putative)	Cytoplasm	transporter
-2.035	A_44_P808769	CLCN4	chloride voltage-gated channel 4	Plasma Membrane	ion channel
-2.035	A_43_P21508	EML5	echinoderm microtubule associated protein like 5	Cytoplasm	other
-2.038	A_43_P21507	HERC1	HECT and RLD domain containing E3 ubiquitin protein ligase family member 1	Cytoplasm	other
-2.04	A_43_P13836	NCOR1	nuclear receptor corepressor 1	Nucleus	transcription regulator
-2.041	A_44_P1004781	SGCB	sarcoglycan beta	Plasma Membrane	other
-2.048	A_44_P140429	ASB9	ankyrin repeat and SOCS box containing 9	Nucleus	transcription regulator
-2.056	A_44_P976287	CDKL2	cyclin dependent kinase like 2	Nucleus	kinase
-2.056	A_44_P1014902	ZNF770	zinc finger protein 770	Other	other
-2.062	A_44_P509865	PLA2G16	phospholipase A2 group XVI	Nucleus	enzyme
-2.064	A_44_P324554	NDNF	neuron derived neurotrophic factor	Extracellular Space	other
-2.069	A_44_P214408	ABLIM1	actin binding LIM protein 1	Cytoplasm	other
-2.071	A_43_P11651	PEMT	phosphatidylethanolamine N-methyltransferase	Cytoplasm	enzyme
-2.073	A_44_P480433	KAZALD1	Kazal type serine peptidase inhibitor domain 1	Extracellular Space	other
-2.075	A_44_P304842	TLE1	transducin like enhancer of split 1	Nucleus	transcription regulator
-2.078	A_43_P19525	ARHGAP12	Rho GTPase activating protein 12	Cytoplasm	other
-2.079	A_43_P12127	ENSA	endosulfine alpha	Cytoplasm	transporter
-2.082	A_44_P1050755	BOD1L1	biorientation of chromosomes in cell division 1 like 1	Nucleus	other
-2.082	A_44_P305870	TPPP3	tubulin polymerization promoting protein family member 3	Cytoplasm	other
-2.084	A_44_P592790	PANK1	pantothenate kinase 1	Cytoplasm	kinase
-2.085	A_44_P764174	FCMR	Fc fragment of IgM receptor	Plasma Membrane	other
-2.087	A_44_P434216	RDH11	retinol dehydrogenase 11 (all-trans/9-cis/11-cis)	Cytoplasm	enzyme
-2.088	A_43_P23446	CA6	carbonic anhydrase 6	Extracellular Space	enzyme
-2.09	A_43_P12433	GRID2	glutamate ionotropic receptor delta type subunit 2	Plasma Membrane	ion channel
-2.093	A_44_P411881	SMIM10L1	small integral membrane protein 10 like 1	Other	other
-2.094	A_44_P741552	C3orf14	chromosome 3 open reading frame 14	Other	other
-2.097	A_44_P975554	ST3GAL3	ST3 beta-galactoside alpha-2,3-sialyltransferase 3	Cytoplasm	enzyme
-2.1	A_44_P389283	ASH1L	ASH1 like histone lysine methyltransferase	Nucleus	transcription regulator
-2.103	A_43_P20631	RILPL1	Rab interacting lysosomal protein like 1	Cytoplasm	other
-2.107	A_43_P19284	BCAR3	breast cancer anti-estrogen resistance 3	Cytoplasm	other
-2.107	A_44_P442780	KCNAB1	potassium voltage-gated channel subfamily A member regulatory beta subunit 1	Plasma Membrane	ion channel
-2.108	A_42_P729693	SYNJ2BP	synaptojanin 2 binding protein	Cytoplasm	other
-2.109	A_44_P157690	SNRPN	small nuclear ribonucleoprotein polypeptide N	Nucleus	other
-2.115	A_42_P543633	GLRB	glycine receptor beta	Plasma Membrane	ion channel
-2.115	A_43_P17836	OTUD6B	OTU domain containing 6B	Other	other
-2.116	A_44_P973511	LRP11	LDL receptor related protein 11	Other	other
-2.117	A_44_P380575	SLC7A5	solute carrier family 7 member 5	Plasma Membrane	transporter
-2.122	A_44_P201601	GLCCI1	glucocorticoid induced 1	Cytoplasm	other
-2.122	A_42_P761516	KAT6A	lysine acetyltransferase 6A	Nucleus	enzyme
-2.124	A_44_P472442	BNIP3	BCL2 interacting protein 3	Cytoplasm	other
-2.125	A_44_P367421	SLC4A4	solute carrier family 4 member 4	Plasma Membrane	transporter
-2.126	A_43_P18920	ERCC8	ERCC excision repair 8, CSA ubiquitin ligase complex subunit	Nucleus	transcription regulator
-2.13	A_44_P1010087	HOXA2	homeobox A2	Nucleus	transcription regulator
-2.131	A_44_P407740	C2CD4D	C2 calcium dependent domain containing 4D	Other	other
-2.132	A_44_P793922	CACNA1A	calcium voltage-gated channel subunit alpha1 A	Plasma Membrane	ion channel
-2.132	A_42_P566250	DDR2	discoidin domain receptor tyrosine kinase 2	Plasma Membrane	kinase
-2.133	A_43_P15576	Chn1	chimerin 1	Plasma Membrane	other
-2.133	A_44_P342520	Nkain4	Sodium/potassium transporting ATPase interacting 4	Other	other
-2.133	A_44_P1006090	SPG20	spastic paraplegia 20 (Troyer syndrome)	Cytoplasm	other
-2.147	A_44_P531758	CRYAB	crystallin alpha B	Nucleus	other
-2.15	A_44_P761708	SLC27A4	solute carrier family 27 member 4	Plasma Membrane	transporter
-2.152	A_44_P623125	SPTLC2	serine palmitoyltransferase long chain base subunit 2	Cytoplasm	enzyme
-2.153	A_44_P381483	PEX19	peroxisomal biogenesis factor 19	Cytoplasm	other
-2.156	A_44_P196984	FKTN	fukutin	Extracellular Space	other
-2.159	A_44_P789583	TMEM47	transmembrane protein 47	Plasma Membrane	other
-2.164	A_44_P173244	TCTA	T-cell leukemia translocation altered	Other	other
-2.168	A_44_P998500	DRC3	dynein regulatory complex subunit 3	Cytoplasm	other
-2.171	A_44_P469188	APPBP2	amyloid beta precursor protein binding protein 2	Cytoplasm	other
-2.171	A_44_P187293	PEA15	phosphoprotein enriched in astrocytes 15	Cytoplasm	transporter
-2.171	A_44_P347420	USP43	ubiquitin specific peptidase 43	Nucleus	peptidase
-2.173	A_44_P286245	CRBN	cereblon	Cytoplasm	enzyme
-2.174	A_44_P153206	KRAS	KRAS proto-oncogene, GTPase	Cytoplasm	enzyme
-2.178	A_44_P792507	Ptpn14	protein tyrosine phosphatase, non-receptor type 14	Nucleus	phosphatase
-2.18	A_44_P410027	NGLY1	N-glycanase 1	Cytoplasm	enzyme
-2.184	A_42_P509766	PPARA	peroxisome proliferator activated receptor alpha	Nucleus	ligand-dependent nuclear receptor
-2.185	A_44_P464942	ZBTB20	zinc finger and BTB domain containing 20	Nucleus	transcription regulator
-2.191	A_42_P553444	PCSK5	proprotein convertase subtilisin/kexin type 5	Extracellular Space	peptidase
-2.196	A_42_P713089	PKP4	plakophilin 4	Plasma Membrane	other
-2.199	A_44_P823682	Eda	ectodysplasin-A	Other	other
-2.199	A_44_P378799	IGFBP6	insulin like growth factor binding protein 6	Extracellular Space	other
-2.205	A_43_P17162	SNX13	sorting nexin 13	Cytoplasm	transporter
-2.207	A_44_P252976	GSTO2	glutathione S-transferase omega 2	Cytoplasm	enzyme
-2.207	A_44_P133060	NIPA1	non imprinted in Prader-Willi/Angelman syndrome 1	Plasma Membrane	transporter
-2.208	A_44_P1018289	FAR1	fatty acyl-CoA reductase 1	Cytoplasm	enzyme
-2.213	A_44_P215689	LOC100912852	disks large homolog 5-like	Other	other
-2.213	A_44_P499171	Mtmr7	myotubularin related protein 7	Cytoplasm	other
-2.22	A_42_P733209	DGAT2	diacylglycerol O-acyltransferase 2	Cytoplasm	enzyme
-2.222	A_44_P668388	WDR54	WD repeat domain 54	Other	other
-2.229	A_44_P264293	MAOA	monoamine oxidase A	Cytoplasm	enzyme
-2.231	A_44_P777181	RAB22A	RAB22A, member RAS oncogene family	Cytoplasm	enzyme
-2.24	A_42_P529711	NKD1	naked cuticle homolog 1	Other	other
-2.246	A_44_P259125	NKIRAS1	NFKB inhibitor interacting Ras like 1	Other	enzyme
-2.246	A_44_P510222	Rnf122	ring finger protein 122	Other	other
-2.251	A_43_P18107	FRY	FRY microtubule binding protein	Extracellular Space	other
-2.253	A_42_P547616	NDRG2	NDRG family member 2	Cytoplasm	other
-2.256	A_44_P761172	GID4	GID complex subunit 4 homolog	Nucleus	other
-2.259	A_42_P524370	TCF4	transcription factor 4	Nucleus	transcription regulator
-2.265	A_44_P374586	CYB5A	cytochrome b5 type A	Cytoplasm	enzyme
-2.265	A_44_P976960	PDZD3	PDZ domain containing 3	Plasma Membrane	transporter
-2.267	A_44_P756922	GLYCTK	glycerate kinase	Cytoplasm	kinase
-2.269	A_44_P274397	CERS2	ceramide synthase 2	Nucleus	transcription regulator
-2.269	A_44_P108588	FST	follistatin	Extracellular Space	other
-2.272	A_44_P668293	CPEB3	cytoplasmic polyadenylation element binding protein 3	Cytoplasm	translation regulator
-2.278	A_44_P1052046	Abi3bp	ABI gene family, member 3 (NESH) binding protein	Extracellular Space	other
-2.279	A_44_P1009656	9530053A07Rik	RIKEN cDNA 9530053A07 gene	Other	other
-2.287	A_44_P291157	FAM126B	family with sequence similarity 126 member B	Other	other
-2.293	A_44_P215393	FAM107A	family with sequence similarity 107 member A	Nucleus	other
-2.299	A_44_P809228	LOC102555762	uncharacterized LOC102555762	Other	other
-2.302	A_44_P898857	FITM2	fat storage inducing transmembrane protein 2	Cytoplasm	other
-2.303	A_44_P241781	TMCC3	transmembrane and coiled-coil domain family 3	Other	other
-2.304	A_44_P461025	TET1	tet methylcytosine dioxygenase 1	Nucleus	enzyme
-2.304	A_44_P137334	TFB1M	transcription factor B1, mitochondrial	Cytoplasm	transcription regulator
-2.305	A_44_P110429	FAM57A	family with sequence similarity 57 member A	Plasma Membrane	other
-2.318	A_44_P762003	AMIGO1	adhesion molecule with Ig like domain 1	Plasma Membrane	other
-2.318	A_44_P613170	LOC100909913/Ndp	NDP, norrin cystine knot growth factor	Extracellular Space	cytokine
-2.32	A_44_P245835	C14orf37	chromosome 14 open reading frame 37	Extracellular Space	other
-2.323	A_44_P181548	PIP4K2A	phosphatidylinositol-5-phosphate 4-kinase type 2 alpha	Cytoplasm	kinase
-2.323	A_44_P463871	PRKD1	protein kinase D1	Cytoplasm	kinase
-2.327	A_42_P464378	ITIH3	inter-alpha-trypsin inhibitor heavy chain 3	Extracellular Space	other
-2.329	A_44_P476733	NQO1	NAD(P)H quinone dehydrogenase 1	Cytoplasm	enzyme
-2.33	A_44_P543643	IQCJ-SCHIP1	IQCJ-SCHIP1 readthrough	Cytoplasm	other
-2.332	A_43_P13409	ZDHHC2	zinc finger DHHC-type containing 2	Nucleus	enzyme
-2.336	A_43_P12996	CRYM	crystallin mu	Cytoplasm	enzyme
-2.338	A_44_P544386	NACC2	NACC family member 2	Nucleus	transcription regulator
-2.341	A_42_P634930	RCAN2	regulator of calcineurin 2	Other	other
-2.355	A_44_P331276	FHIT	fragile histidine triad	Cytoplasm	enzyme
-2.359	A_44_P267610	Trib2	tribbles pseudokinase 2	Other	other
-2.36	A_44_P975471	RGD1560398	RGD1560398	Other	other
-2.361	A_44_P410203	CCM2L	CCM2 like scaffolding protein	Other	other
-2.362	A_44_P240881	ART3	ADP-ribosyltransferase 3	Plasma Membrane	enzyme
-2.367	A_44_P424552	PLSCR4	phospholipid scramblase 4	Plasma Membrane	enzyme
-2.368	A_43_P20794	OSBPL5	oxysterol binding protein like 5	Cytoplasm	transporter
-2.377	A_43_P19450	PRKCA	protein kinase C alpha	Cytoplasm	kinase
-2.38	A_44_P131694	PHKB	phosphorylase kinase regulatory subunit beta	Cytoplasm	kinase
-2.384	A_43_P12247	ALDH1L1	aldehyde dehydrogenase 1 family member L1	Cytoplasm	enzyme
-2.384	A_43_P14971	PXMP2	peroxisomal membrane protein 2	Cytoplasm	other
-2.385	A_44_P260589	PAPLN	papilin, proteoglycan like sulfated glycoprotein	Extracellular Space	other
-2.388	A_44_P555525	EPDR1	ependymin related 1	Nucleus	other
-2.392	A_43_P12855	OLFM1	olfactomedin 1	Cytoplasm	other
-2.394	A_43_P15261	NR3C2	nuclear receptor subfamily 3 group C member 2	Nucleus	ligand-dependent nuclear receptor
-2.394	A_43_P18228	SELENOI	selenoprotein I	Cytoplasm	enzyme
-2.395	A_44_P276477	RALGAPA1	Ral GTPase activating protein catalytic alpha subunit 1	Cytoplasm	other
-2.399	A_43_P19503	LOC686911	similar to Exocyst complex component 1 (Exocyst complex component Sec3)	Other	other
-2.405	A_44_P788634	MUM1L1	MUM1 like 1	Cytoplasm	other
-2.407	A_43_P13847	UBE2K	ubiquitin conjugating enzyme E2 K	Cytoplasm	transcription regulator
-2.408	A_44_P391982	MMD	monocyte to macrophage differentiation associated	Plasma Membrane	kinase
-2.408	A_44_P1036740	Tnxa-ps1	tenascin XA, pseudogene 1	Cytoplasm	other
-2.409	A_43_P13468	HSPA4L	heat shock protein family A (Hsp70) member 4 like	Cytoplasm	other
-2.412	A_44_P545735	Scaper	S-phase cyclin A-associated protein in the ER	Nucleus	other
-2.413	A_43_P20743	ELMO1	engulfment and cell motility 1	Cytoplasm	other
-2.416	A_44_P328121	SV2B	synaptic vesicle glycoprotein 2B	Plasma Membrane	transporter
-2.418	A_44_P104804	SARAF	store-operated calcium entry associated regulatory factor	Cytoplasm	other
-2.422	A_42_P522857	MGST3	microsomal glutathione S-transferase 3	Cytoplasm	enzyme
-2.422	A_43_P14099	YIPF6	Yip1 domain family member 6	Cytoplasm	other
-2.425	A_44_P697841	COX11	COX11, cytochrome c oxidase copper chaperone	Cytoplasm	enzyme
-2.429	A_43_P18918	ACBD5	acyl-CoA binding domain containing 5	Nucleus	other
-2.429	A_44_P392234	FGF7	fibroblast growth factor 7	Extracellular Space	growth factor
-2.431	A_44_P638511	PAQR5	progestin and adipoQ receptor family member 5	Other	other
-2.433	A_43_P22401	Lrrc51	leucine rich repeat containing 51	Other	other
-2.438	A_44_P255756	CNTLN	centlein	Cytoplasm	other
-2.451	A_44_P315106	CFL2	cofilin 2	Extracellular Space	other
-2.472	A_44_P454961	PHF8	PHD finger protein 8	Nucleus	enzyme
-2.479	A_44_P455501	SLC25A23	solute carrier family 25 member 23	Cytoplasm	transporter
-2.484	A_43_P19155	PATJ	PATJ, crumbs cell polarity complex component	Plasma Membrane	other
-2.485	A_44_P241241	THEM4	thioesterase superfamily member 4	Plasma Membrane	enzyme
-2.487	A_44_P214366	ACSL1	acyl-CoA synthetase long-chain family member 1	Cytoplasm	enzyme
-2.492	A_44_P182431	SRD5A1	steroid 5 alpha-reductase 1	Cytoplasm	enzyme
-2.494	A_44_P477224	TTC9B	tetratricopeptide repeat domain 9B	Other	other
-2.499	A_43_P14910	DDC	dopa decarboxylase	Cytoplasm	enzyme
-2.501	A_44_P605240	Pln	phospholamban	Cytoplasm	other
-2.504	A_44_P623578	FGF1	fibroblast growth factor 1	Extracellular Space	growth factor
-2.511	A_44_P302697	ARHGAP31	Rho GTPase activating protein 31	Cytoplasm	other
-2.517	A_44_P556959	P4HTM	prolyl 4-hydroxylase, transmembrane	Cytoplasm	enzyme
-2.519	A_44_P466757	GRAMD2A	GRAM domain containing 2A	Other	other
-2.521	A_42_P529780	SPDYA	speedy/RINGO cell cycle regulator family member A	Nucleus	other
-2.525	A_43_P12780	AGPS	alkylglycerone phosphate synthase	Cytoplasm	enzyme
-2.525	A_44_P253450	SGCD	sarcoglycan delta	Cytoplasm	other
-2.525	A_42_P824178	Slc25a1	solute carrier family 25 (mitochondrial carrier, citrate transporter), member 1	Cytoplasm	transporter
-2.526	A_44_P514379	ACACA	acetyl-CoA carboxylase alpha	Cytoplasm	enzyme
-2.529	A_44_P449745	ASCL3	achaete-scute family bHLH transcription factor 3	Nucleus	transcription regulator
-2.53	A_44_P234071	GPAT3	glycerol-3-phosphate acyltransferase 3	Cytoplasm	enzyme
-2.537	A_44_P1030714	CCDC92	coiled-coil domain containing 92	Cytoplasm	other
-2.546	A_44_P989546	MAP3K13	mitogen-activated protein kinase kinase kinase 13	Cytoplasm	kinase
-2.557	A_44_P391360	ZHX1	zinc fingers and homeoboxes 1	Nucleus	transcription regulator
-2.566	A_42_P525317	CACNB2	calcium voltage-gated channel auxiliary subunit beta 2	Plasma Membrane	ion channel
-2.567	A_44_P322608	FIS1	fission, mitochondrial 1	Cytoplasm	other
-2.576	A_42_P581836	FAM178B	family with sequence similarity 178 member B	Other	other
-2.576	A_43_P22657	SATB1	SATB homeobox 1	Nucleus	transcription regulator
-2.577	A_44_P229481	PAQR6	progestin and adipoQ receptor family member 6	Plasma Membrane	other
-2.588	A_44_P899938	FAM124A	family with sequence similarity 124 member A	Other	other
-2.616	A_43_P16493	PMP2	peripheral myelin protein 2	Cytoplasm	other
-2.621	A_44_P479359	MVK	mevalonate kinase	Cytoplasm	kinase
-2.624	A_44_P605884	SPATA31D1 (includes others)	SPATA31 subfamily D member 1	Other	other
-2.629	A_43_P13332	PLPP3	phospholipid phosphatase 3	Plasma Membrane	phosphatase
-2.635	A_42_P684538	SLC2A1	solute carrier family 2 member 1	Plasma Membrane	transporter
-2.637	A_42_P453976	Ifitm6	interferon induced transmembrane protein 6	Other	other
-2.651	A_44_P484332	HSPA12A	heat shock protein family A (Hsp70) member 12A	Cytoplasm	other
-2.655	A_44_P373567	TMEM117	transmembrane protein 117	Cytoplasm	other
-2.66	A_44_P274083	AQP11	aquaporin 11	Plasma Membrane	transporter
-2.665	A_44_P134342	PARD6B	par-6 family cell polarity regulator beta	Plasma Membrane	other
-2.678	A_44_P548420	PMVK	phosphomevalonate kinase	Cytoplasm	kinase
-2.685	A_42_P816427	WISP1	WNT1 inducible signaling pathway protein 1	Extracellular Space	other
-2.688	A_42_P462771	CD9	CD9 molecule	Plasma Membrane	other
-2.688	A_44_P191822	Nat8f5	N-acetyltransferase 8 (GCN5-related) family member 5	Other	enzyme
-2.692	A_44_P415115	TSPAN13	tetraspanin 13	Plasma Membrane	other
-2.694	A_43_P16060	MITF	melanogenesis associated transcription factor	Nucleus	transcription regulator
-2.698	A_44_P436399	Rimkla	ribosomal modification protein rimK-like family member A	Cytoplasm	enzyme
-2.698	A_44_P496255	SLCO3A1	solute carrier organic anion transporter family member 3A1	Plasma Membrane	transporter
-2.699	A_44_P255109	SNN	stannin	Plasma Membrane	other
-2.702	A_44_P409425	BBOF1	basal body orientation factor 1	Cytoplasm	other
-2.712	A_44_P308398	PPP1R16B	protein phosphatase 1 regulatory subunit 16B	Plasma Membrane	phosphatase
-2.714	A_44_P367481	P2RX6	purinergic receptor P2X 6	Plasma Membrane	ion channel
-2.715	A_44_P506538	RMDN2	regulator of microtubule dynamics 2	Cytoplasm	other
-2.724	A_43_P15613	NRTN	neurturin	Extracellular Space	growth factor
-2.725	A_44_P533193	ANKRD13A	ankyrin repeat domain 13A	Plasma Membrane	other
-2.726	A_44_P545426	SLC16A1	solute carrier family 16 member 1	Plasma Membrane	transporter
-2.733	A_44_P547771	CITED1	Cbp/p300 interacting transactivator with Glu/Asp rich carboxy-terminal domain 1	Nucleus	transcription regulator
-2.749	A_44_P553262	HACD3	3-hydroxyacyl-CoA dehydratase 3	Cytoplasm	enzyme
-2.75	A_42_P726132	TMEM62	transmembrane protein 62	Other	enzyme
-2.753	A_44_P197207	MRPS7	mitochondrial ribosomal protein S7	Cytoplasm	other
-2.761	A_43_P10230	SLC9A6	solute carrier family 9 member A6	Plasma Membrane	transporter
-2.765	A_44_P621013	OLFML1	olfactomedin like 1	Extracellular Space	other
-2.766	A_44_P1050200	C1QTNF12	C1q and TNF related 12	Extracellular Space	other
-2.777	A_44_P156589	NGEF	neuronal guanine nucleotide exchange factor	Cytoplasm	other
-2.789	A_44_P517858	SVOP	SV2 related protein	Cytoplasm	transporter
-2.799	A_44_P183160	HOXC11	homeobox C11	Nucleus	transcription regulator
-2.805	A_44_P914022	SYCE3	synaptonemal complex central element protein 3	Nucleus	other
-2.807	A_43_P12665	MMP24	matrix metallopeptidase 24	Plasma Membrane	peptidase
-2.81	A_44_P403532	GARNL3	GTPase activating Rap/RanGAP domain like 3	Other	other
-2.831	A_44_P520349	BRDT	bromodomain testis associated	Nucleus	kinase
-2.831	A_44_P776390	KCNK5	potassium two pore domain channel subfamily K member 5	Plasma Membrane	ion channel
-2.851	A_44_P595964	IQSEC1	IQ motif and Sec7 domain 1	Cytoplasm	other
-2.852	A_44_P1002317	TBATA	thymus, brain and testes associated	Cytoplasm	other
-2.863	A_44_P130811	ARSK	arylsulfatase family member K	Extracellular Space	enzyme
-2.866	A_42_P727022	RAB40B	RAB40B, member RAS oncogene family	Plasma Membrane	enzyme
-2.867	A_44_P994492	DDAH1	dimethylarginine dimethylaminohydrolase 1	Cytoplasm	enzyme
-2.869	A_44_P240781	CAV1	caveolin 1	Plasma Membrane	transmembrane receptor
-2.875	A_44_P578044	GREB1L	growth regulation by estrogen in breast cancer 1 like	Extracellular Space	other
-2.878	A_43_P17494	LIMCH1	LIM and calponin homology domains 1	Other	other
-2.878	A_42_P538400	NTRK2	neurotrophic receptor tyrosine kinase 2	Plasma Membrane	kinase
-2.878	A_44_P540690	SLC5A3	solute carrier family 5 member 3	Plasma Membrane	transporter
-2.884	A_44_P666098	BEAN1	brain expressed associated with NEDD4 1	Other	other
-2.891	A_42_P761436	NPW	neuropeptide W	Extracellular Space	other
-2.907	A_44_P960805	GCA	grancalcin	Cytoplasm	other
-2.911	A_44_P201077	ASRGL1	asparaginase like 1	Cytoplasm	enzyme
-2.928	A_42_P676630	GPLD1	glycosylphosphatidylinositol specific phospholipase D1	Cytoplasm	enzyme
-2.929	A_44_P529455	GNRH1	gonadotropin releasing hormone 1	Extracellular Space	other
-2.931	A_44_P325133	ADAMTSL2	ADAMTS like 2	Extracellular Space	other
-2.938	A_44_P1052607	AOX1	aldehyde oxidase 1	Cytoplasm	enzyme
-2.939	A_43_P12779	NRN1	neuritin 1	Cytoplasm	other
-2.94	A_44_P346832	TESC	tescalcin	Cytoplasm	other
-2.953	A_44_P443465	HEPACAM	hepatic and glial cell adhesion molecule	Plasma Membrane	other
-2.954	A_44_P492707	SFRP5	secreted frizzled related protein 5	Plasma Membrane	transmembrane receptor
-2.96	A_44_P356322	Tmem80	transmembrane protein 80	Other	other
-2.968	A_44_P730489	STARD10	StAR related lipid transfer domain containing 10	Cytoplasm	other
-2.971	A_42_P665879	ATF5	activating transcription factor 5	Nucleus	transcription regulator
-2.976	A_44_P428437	MIA	melanoma inhibitory activity	Extracellular Space	other
-2.978	A_44_P1046787	SBSPON	somatomedin B and thrombospondin type 1 domain containing	Extracellular Space	other
-2.982	A_44_P640345	GADL1	glutamate decarboxylase like 1	Cytoplasm	enzyme
-2.983	A_44_P487123	SLC25A27	solute carrier family 25 member 27	Cytoplasm	transporter
-2.987	A_44_P306162	UGT8	UDP glycosyltransferase 8	Cytoplasm	enzyme
-2.988	A_44_P197064	TMEM63C	transmembrane protein 63C	Other	ion channel
-3.005	A_44_P175703	MGC114492/RGD1559726	similar to melanoma antigen family A, 6	Other	other
-3.006	A_44_P1040966	LRRC24	leucine rich repeat containing 24	Other	other
-3.007	A_44_P762095	IGIP	IgA inducing protein	Other	other
-3.009	A_44_P135641	RAPSN	receptor associated protein of the synapse	Plasma Membrane	other
-3.011	A_43_P16895	CCSER2	coiled-coil serine rich protein 2	Other	other
-3.016	A_44_P287564	EBP	emopamil binding protein (sterol isomerase)	Cytoplasm	enzyme
-3.033	A_44_P526978	BMP3	bone morphogenetic protein 3	Extracellular Space	growth factor
-3.034	A_44_P406957	CYB561	cytochrome b561	Cytoplasm	enzyme
-3.035	A_42_P489817	PPM1L	protein phosphatase, Mg2+/Mn2+ dependent 1L	Cytoplasm	phosphatase
-3.063	A_43_P13088	MSMO1	methylsterol monooxygenase 1	Cytoplasm	enzyme
-3.064	A_42_P646290	GNAZ	G protein subunit alpha z	Plasma Membrane	enzyme
-3.069	A_42_P624773	CPZ	carboxypeptidase Z	Extracellular Space	peptidase
-3.073	A_44_P868920	THRB	thyroid hormone receptor beta	Nucleus	ligand-dependent nuclear receptor
-3.074	A_42_P544328	Cd99l2	CD99 molecule-like 2	Plasma Membrane	other
-3.085	A_42_P807826	SYNE1	spectrin repeat containing nuclear envelope protein 1	Nucleus	other
-3.088	A_44_P358492	FDFT1	farnesyl-diphosphate farnesyltransferase 1	Cytoplasm	enzyme
-3.09	A_44_P558411	SCRG1	stimulator of chondrogenesis 1	Extracellular Space	other
-3.106	A_44_P245314	CACNB3	calcium voltage-gated channel auxiliary subunit beta 3	Plasma Membrane	ion channel
-3.115	A_44_P441434	CAV2	caveolin 2	Plasma Membrane	other
-3.116	A_44_P549075	PLA2G5	phospholipase A2 group V	Extracellular Space	enzyme
-3.121	A_44_P247966	NELL1	neural EGFL like 1	Extracellular Space	growth factor
-3.123	A_44_P971207	NUDT11	nudix hydrolase 11	Cytoplasm	phosphatase
-3.127	A_44_P175349	CRISPLD2	cysteine rich secretory protein LCCL domain containing 2	Cytoplasm	other
-3.139	A_44_P711487	ARG2	arginase 2	Cytoplasm	enzyme
-3.139	A_44_P260475	HDAC11	histone deacetylase 11	Nucleus	transcription regulator
-3.144	A_43_P15451	TPSAB1/TPSB2	tryptase alpha/beta 1	Extracellular Space	peptidase
-3.146	A_44_P432826	RAP1GDS1	Rap1 GTPase-GDP dissociation stimulator 1	Cytoplasm	other
-3.15	A_43_P15021	SLC25A29	solute carrier family 25 member 29	Cytoplasm	transporter
-3.152	A_44_P321506	SLC25A33	solute carrier family 25 member 33	Cytoplasm	transporter
-3.156	A_44_P821386	Aldh1a7	aldehyde dehydrogenase family 1, subfamily A7	Cytoplasm	enzyme
-3.168	A_44_P1007110	SVIP	small VCP interacting protein	Cytoplasm	other
-3.179	A_44_P432452	AKR1B1	aldo-keto reductase family 1 member B	Cytoplasm	enzyme
-3.179	A_44_P291552	MFSD2A	major facilitator superfamily domain containing 2A	Plasma Membrane	transporter
-3.193	A_44_P710192	TMEM45B	transmembrane protein 45B	Extracellular Space	other
-3.194	A_44_P149161	PSAT1	phosphoserine aminotransferase 1	Cytoplasm	enzyme
-3.195	A_42_P589190	AACS	acetoacetyl-CoA synthetase	Cytoplasm	enzyme
-3.195	A_42_P631818	CNMD	chondromodulin	Extracellular Space	other
-3.217	A_43_P11729	HMGCR	3-hydroxy-3-methylglutaryl-CoA reductase	Cytoplasm	enzyme
-3.222	A_43_P11752	MAOB	monoamine oxidase B	Cytoplasm	enzyme
-3.23	A_44_P398193	CGREF1	cell growth regulator with EF-hand domain 1	Extracellular Space	other
-3.233	A_44_P578505	LOC100364027	hexokinase 1-like	Cytoplasm	other
-3.25	A_44_P438750	RDH12	retinol dehydrogenase 12 (all-trans/9-cis/11-cis)	Cytoplasm	enzyme
-3.256	A_44_P555261	ALDH6A1	aldehyde dehydrogenase 6 family member A1	Cytoplasm	enzyme
-3.261	A_44_P653272	GPR155	G protein-coupled receptor 155	Plasma Membrane	G-protein coupled receptor
-3.262	A_44_P492352	MTURN	maturin, neural progenitor differentiation regulator homolog	Other	other
-3.275	A_44_P406099	CAVIN2	caveolae associated protein 2	Plasma Membrane	other
-3.276	A_44_P359121	DCLK3	doublecortin like kinase 3	Cytoplasm	kinase
-3.277	A_44_P365580	SQLE	squalene epoxidase	Cytoplasm	enzyme
-3.278	A_43_P20288	SFMBT1	Scm-like with four mbt domains 1	Nucleus	transcription regulator
-3.283	A_44_P222632	DUSP15	dual specificity phosphatase 15	Cytoplasm	phosphatase
-3.291	A_43_P14633	Zfp651	zinc finger protein 651	Other	other
-3.293	A_44_P181836	SECISBP2L	SECIS binding protein 2 like	Other	other
-3.295	A_44_P278408	CHRDL1	chordin like 1	Extracellular Space	other
-3.298	A_44_P550237	MAPT	microtubule associated protein tau	Plasma Membrane	other
-3.327	A_44_P264785	SLC38A1	solute carrier family 38 member 1	Plasma Membrane	transporter
-3.349	A_44_P203355	HAPLN2	hyaluronan and proteoglycan link protein 2	Extracellular Space	other
-3.354	A_44_P154793	IQCG	IQ motif containing G	Cytoplasm	other
-3.362	A_43_P20053	FUT8	fucosyltransferase 8	Cytoplasm	enzyme
-3.377	A_44_P343393	FXYD3	FXYD domain containing ion transport regulator 3	Plasma Membrane	other
-3.383	A_44_P291521	LOC103691479	uncharacterized LOC103691479	Other	other
-3.386	A_44_P484474	LSMEM2	leucine rich single-pass membrane protein 2	Other	other
-3.399	A_44_P187056	ITGA6	integrin subunit alpha 6	Plasma Membrane	transmembrane receptor
-3.4	A_42_P569832	RAB6B	RAB6B, member RAS oncogene family	Cytoplasm	enzyme
-3.4	A_44_P283030	Scd2	stearoyl-Coenzyme A desaturase 2	Cytoplasm	enzyme
-3.407	A_42_P737912	FAM180A	family with sequence similarity 180 member A	Other	other
-3.411	A_42_P809869	TST	thiosulfate sulfurtransferase	Cytoplasm	enzyme
-3.412	A_43_P12330	SLC13A3	solute carrier family 13 member 3	Plasma Membrane	transporter
-3.414	A_44_P168430	ATP8A1	ATPase phospholipid transporting 8A1	Cytoplasm	transporter
-3.415	A_44_P687542	ZNF106	zinc finger protein 106	Cytoplasm	other
-3.42	A_43_P14604	CLSTN2	calsyntenin 2	Plasma Membrane	transporter
-3.429	A_44_P354244	FRRS1L	ferric chelate reductase 1 like	Cytoplasm	transporter
-3.429	A_43_P12200	SLC26A1	solute carrier family 26 member 1	Plasma Membrane	transporter
-3.433	A_44_P310168	TGFA	transforming growth factor alpha	Extracellular Space	growth factor
-3.439	A_44_P118625	CALB1	calbindin 1	Cytoplasm	other
-3.453	A_44_P322960	ARAF	A-Raf proto-oncogene, serine/threonine kinase	Cytoplasm	kinase
-3.46	A_44_P105448	Col4a5	collagen type IV alpha 5 chain	Extracellular Space	other
-3.474	A_44_P547168	INSIG1	insulin induced gene 1	Cytoplasm	other
-3.476	A_42_P794613	MVD	mevalonate diphosphate decarboxylase	Cytoplasm	enzyme
-3.478	A_44_P314087	LOC102552073/LOC681186	hypothetical protein LOC681186	Other	other
-3.48	A_43_P15464	CAPN8	calpain 8	Cytoplasm	peptidase
-3.486	A_42_P573118	C21orf2	chromosome 21 open reading frame 2	Cytoplasm	other
-3.487	A_43_P19890	CDKL5	cyclin dependent kinase like 5	Nucleus	kinase
-3.496	A_42_P502271	FAM81A	family with sequence similarity 81 member A	Other	other
-3.505	A_42_P641962	PCSK6	proprotein convertase subtilisin/kexin type 6	Extracellular Space	peptidase
-3.51	A_43_P14045	SEMA4G	semaphorin 4G	Plasma Membrane	other
-3.515	A_44_P618099	ARVCF	armadillo repeat gene deleted in velocardiofacial syndrome	Plasma Membrane	other
-3.561	A_43_P17213	ABHD1	abhydrolase domain containing 1	Other	other
-3.566	A_44_P840399	LOC102553942	uncharacterized LOC102553942	Other	other
-3.578	A_44_P590999	TC2N	tandem C2 domains, nuclear	Nucleus	transporter
-3.587	A_44_P103309	SGPP2	sphingosine-1-phosphate phosphatase 2	Cytoplasm	phosphatase
-3.603	A_44_P241156	MAMDC2	MAM domain containing 2	Extracellular Space	other
-3.606	A_42_P543877	TLCD1	TLC domain containing 1	Other	other
-3.643	A_44_P360845	GHR	growth hormone receptor	Plasma Membrane	transmembrane receptor
-3.644	A_44_P147055	GJB1	gap junction protein beta 1	Plasma Membrane	transporter
-3.684	A_44_P637687	KIAA1549L	KIAA1549 like	Cytoplasm	other
-3.698	A_44_P260375	COBLL1	cordon-bleu WH2 repeat protein like 1	Extracellular Space	other
-3.699	A_44_P515211	TNFSF15	TNF superfamily member 15	Extracellular Space	cytokine
-3.717	A_44_P295531	9530003J23Rik	RIKEN cDNA 9530003J23 gene	Extracellular Space	other
-3.723	A_44_P167951	PKIA	cAMP-dependent protein kinase inhibitor alpha	Cytoplasm	other
-3.732	A_44_P727508	RAB11FIP4	RAB11 family interacting protein 4	Cytoplasm	other
-3.734	A_44_P215157	LIN7B	lin-7 homolog B, crumbs cell polarity complex component	Cytoplasm	other
-3.735	A_44_P396772	LRRN1	leucine rich repeat neuronal 1	Other	other
-3.738	A_44_P163408	SLC12A2	solute carrier family 12 member 2	Plasma Membrane	transporter
-3.746	A_44_P538165	TSPAN17	tetraspanin 17	Other	enzyme
-3.761	A_44_P272148	SPIRE2	spire type actin nucleation factor 2	Cytoplasm	other
-3.765	A_44_P227221	SYDE2	synapse defective Rho GTPase homolog 2	Cytoplasm	other
-3.803	A_42_P699217	SOX2	SRY-box 2	Nucleus	transcription regulator
-3.807	A_44_P318707	ACAT2	acetyl-CoA acetyltransferase 2	Cytoplasm	enzyme
-3.816	A_42_P578386	TSSK2	testis specific serine kinase 2	Cytoplasm	kinase
-3.818	A_43_P15496	MS4A2	membrane spanning 4-domains A2	Plasma Membrane	transmembrane receptor
-3.82	A_44_P424148	GLDC	glycine decarboxylase	Cytoplasm	enzyme
-3.827	A_44_P309979	CHST2	carbohydrate sulfotransferase 2	Cytoplasm	enzyme
-3.842	A_44_P996557	PTPDC1	protein tyrosine phosphatase domain containing 1	Extracellular Space	phosphatase
-3.85	A_44_P1017996	WDR17	WD repeat domain 17	Other	other
-3.853	A_44_P960333	MPZL2	myelin protein zero like 2	Plasma Membrane	other
-3.868	A_43_P10290	TSPAN1	tetraspanin 1	Cytoplasm	other
-3.88	A_44_P364961	RHOBTB3	Rho related BTB domain containing 3	Cytoplasm	enzyme
-3.881	A_44_P897781	HSD17B7	hydroxysteroid 17-beta dehydrogenase 7	Cytoplasm	enzyme
-3.894	A_44_P501593	ACSS2	acyl-CoA synthetase short-chain family member 2	Cytoplasm	enzyme
-3.915	A_42_P792817	ME1	malic enzyme 1	Cytoplasm	enzyme
-3.948	A_44_P478172	Tdpoz2	TD and POZ domain containing 2	Other	other
-3.969	A_44_P747182	UNC13C	unc-13 homolog C	Cytoplasm	other
-3.981	A_44_P1051981	EVPL	envoplakin	Plasma Membrane	other
-3.994	A_43_P15252	COL2A1	collagen type II alpha 1 chain	Extracellular Space	other
-3.999	A_44_P536115	ARHGEF9	Cdc42 guanine nucleotide exchange factor 9	Cytoplasm	other
-4	A_44_P432965	FDPS	farnesyl diphosphate synthase	Cytoplasm	enzyme
-4.011	A_43_P10134	HECW2	HECT, C2 and WW domain containing E3 ubiquitin protein ligase 2	Extracellular Space	enzyme
-4.018	A_44_P977318	TFCP2L1	transcription factor CP2 like 1	Nucleus	transcription regulator
-4.035	A_44_P687109	ARHGEF37	Rho guanine nucleotide exchange factor 37	Other	other
-4.045	A_44_P680974	SC5D	sterol-C5-desaturase	Cytoplasm	enzyme
-4.066	A_43_P19435	EGFL6	EGF like domain multiple 6	Extracellular Space	other
-4.089	A_44_P529426	ERBB4	erb-b2 receptor tyrosine kinase 4	Plasma Membrane	kinase
-4.096	A_44_P168285	CYP51A1	cytochrome P450 family 51 subfamily A member 1	Cytoplasm	enzyme
-4.104	A_44_P314110	ERMN	ermin	Extracellular Space	other
-4.11	A_43_P11604	TIMP3	TIMP metallopeptidase inhibitor 3	Extracellular Space	other
-4.123	A_44_P376994	LSAMP	limbic system-associated membrane protein	Plasma Membrane	other
-4.137	A_43_P12162	PPP2R2B	protein phosphatase 2 regulatory subunit Bbeta	Cytoplasm	phosphatase
-4.147	A_44_P105899	AIF1L	allograft inflammatory factor 1 like	Plasma Membrane	other
-4.147	A_44_P387623	GAS2	growth arrest specific 2	Cytoplasm	other
-4.147	A_42_P602822	RET	ret proto-oncogene	Plasma Membrane	kinase
-4.163	A_43_P12868	SMPD3	sphingomyelin phosphodiesterase 3	Cytoplasm	enzyme
-4.169	A_44_P241448	Arxes1/Arxes2	adipocyte-related X-chromosome expressed sequence 2	Cytoplasm	other
-4.191	A_44_P276724	Slc25a48	solute carrier family 25, member 48	Cytoplasm	other
-4.208	A_44_P505145	LPL	lipoprotein lipase	Cytoplasm	enzyme
-4.228	A_44_P1020105	AFF4	AF4/FMR2 family member 4	Nucleus	transcription regulator
-4.231	A_44_P176677	ATP1A2	ATPase Na+/K+ transporting subunit alpha 2	Plasma Membrane	transporter
-4.244	A_44_P793873	SEMA5A	semaphorin 5A	Plasma Membrane	transmembrane receptor
-4.247	A_44_P556299	NSDHL	NAD(P) dependent steroid dehydrogenase-like	Cytoplasm	enzyme
-4.368	A_44_P949804	LGR6	leucine rich repeat containing G protein-coupled receptor 6	Plasma Membrane	G-protein coupled receptor
-4.371	A_44_P1000722	FILIP1	filamin A interacting protein 1	Cytoplasm	other
-4.376	A_44_P874708	PRRG3	proline rich and Gla domain 3	Plasma Membrane	other
-4.377	A_42_P466362	ADCY8	adenylate cyclase 8	Plasma Membrane	enzyme
-4.424	A_44_P198804	NRXN2	neurexin 2	Plasma Membrane	transporter
-4.442	A_44_P233963	MRAS	muscle RAS oncogene homolog	Plasma Membrane	enzyme
-4.446	A_42_P825274	HSPB2	heat shock protein family B (small) member 2	Cytoplasm	other
-4.453	A_44_P553507	ZPLD1	zona pellucida like domain containing 1	Other	other
-4.465	A_44_P426529	ME3	malic enzyme 3	Cytoplasm	enzyme
-4.468	A_44_P290074	COL4A3BP	collagen type IV alpha 3 binding protein	Cytoplasm	kinase
-4.483	A_44_P235978	FASN	fatty acid synthase	Cytoplasm	enzyme
-4.516	A_44_P347250	DHCR24	24-dehydrocholesterol reductase	Cytoplasm	enzyme
-4.518	A_44_P243295	LOC100912723	CD209 antigen-like protein A-like	Other	other
-4.543	A_44_P511034	VEPH1	ventricular zone expressed PH domain containing 1	Nucleus	other
-4.546	A_43_P13051	ST8SIA2	ST8 alpha-N-acetyl-neuraminide alpha-2,8-sialyltransferase 2	Cytoplasm	enzyme
-4.557	A_44_P251944	IDI1	isopentenyl-diphosphate delta isomerase 1	Cytoplasm	enzyme
-4.559	A_44_P480858	RGS22	regulator of G protein signaling 22	Cytoplasm	other
-4.57	A_44_P791404	Luzp2	leucine zipper protein 2	Other	other
-4.581	A_44_P349209	LOC100363914 (includes others)	similar to DC-SIGN	Other	other
-4.587	A_44_P327799	Apoc3	apolipoprotein C-III	Extracellular Space	transporter
-4.652	A_44_P1047441	LRP2	LDL receptor related protein 2	Plasma Membrane	transporter
-4.662	A_44_P527024	COL11A2	collagen type XI alpha 2 chain	Extracellular Space	other
-4.688	A_43_P12695	NCOA2	nuclear receptor coactivator 2	Nucleus	transcription regulator
-4.733	A_42_P637037	CLCN3	chloride voltage-gated channel 3	Plasma Membrane	ion channel
-4.802	A_44_P544757	TMEM178B	transmembrane protein 178B	Other	other
-4.817	A_44_P177434	GPM6A	glycoprotein M6A	Plasma Membrane	ion channel
-4.818	A_44_P685554	DCDC2	doublecortin domain containing 2	Extracellular Space	other
-4.842	A_44_P308925	ABAT	4-aminobutyrate aminotransferase	Cytoplasm	enzyme
-4.924	A_44_P199211	PLCB1	phospholipase C beta 1	Cytoplasm	enzyme
-4.968	A_44_P608485	ROBO3	roundabout guidance receptor 3	Plasma Membrane	transmembrane receptor
-4.98	A_44_P179296	COL6A5	collagen type VI alpha 5 chain	Extracellular Space	other
-5.088	A_44_P361161	LYPD6B	LY6/PLAUR domain containing 6B	Other	other
-5.126	A_44_P883087	RGS13	regulator of G protein signaling 13	Nucleus	other
-5.139	A_44_P289627	GRIA2	glutamate ionotropic receptor AMPA type subunit 2	Plasma Membrane	ion channel
-5.147	A_43_P19094	ELOVL7	ELOVL fatty acid elongase 7	Cytoplasm	enzyme
-5.18	A_42_P478101	EPHX4	epoxide hydrolase 4	Other	enzyme
-5.294	A_44_P118724	ARC	activity regulated cytoskeleton associated protein	Cytoplasm	other
-5.303	A_44_P960765	CHODL	chondrolectin	Plasma Membrane	other
-5.305	A_43_P12115	PROM1	prominin 1	Plasma Membrane	other
-5.421	A_44_P132960	S100A3	S100 calcium binding protein A3	Other	transporter
-5.439	A_44_P777795	LOC102552773	uncharacterized LOC102552773	Other	other
-5.488	A_42_P830311	MRAP	melanocortin 2 receptor accessory protein	Cytoplasm	other
-5.503	A_44_P452145	CAMK2B	calcium/calmodulin dependent protein kinase II beta	Cytoplasm	kinase
-5.508	A_44_P184938	RLBP1	retinaldehyde binding protein 1	Cytoplasm	transporter
-5.56	A_44_P123543	LIN7A	lin-7 homolog A, crumbs cell polarity complex component	Plasma Membrane	other
-5.601	A_43_P11955	SYN2	synapsin II	Plasma Membrane	other
-5.628	A_42_P814765	TM7SF2	transmembrane 7 superfamily member 2	Cytoplasm	enzyme
-5.722	A_44_P398330	Gm4952	predicted gene 4952	Cytoplasm	other
-5.722	A_44_P449938	KCNJ13	potassium voltage-gated channel subfamily J member 13	Plasma Membrane	ion channel
-5.748	A_44_P487240	HMGCS1	3-hydroxy-3-methylglutaryl-CoA synthase 1	Cytoplasm	enzyme
-5.791	A_42_P784541	MPV17L	MPV17 mitochondrial inner membrane protein like	Cytoplasm	other
-5.841	A_44_P378562	FMO3	flavin containing monooxygenase 3	Cytoplasm	enzyme
-5.853	A_44_P263777	SLC6A20	solute carrier family 6 member 20	Plasma Membrane	transporter
-5.923	A_44_P374733	TRHR	thyrotropin releasing hormone receptor	Plasma Membrane	G-protein coupled receptor
-5.962	A_44_P781948	Coch	cochlin	Cytoplasm	other
-6.007	A_44_P321867	FAM213A	family with sequence similarity 213 member A	Extracellular Space	other
-6.036	A_42_P832417	VSNL1	visinin like 1	Cytoplasm	other
-6.18	A_44_P132714	PCLO	piccolo presynaptic cytomatrix protein	Cytoplasm	transporter
-6.197	A_43_P15978	FGF4	fibroblast growth factor 4	Extracellular Space	growth factor
-6.252	A_43_P16988	FA2H	fatty acid 2-hydroxylase	Cytoplasm	enzyme
-6.43	A_44_P215108	LEPR	leptin receptor	Plasma Membrane	transmembrane receptor
-6.535	A_44_P838490	RGR	retinal G protein coupled receptor	Plasma Membrane	G-protein coupled receptor
-6.629	A_44_P560021	B3GALT2	beta-1,3-galactosyltransferase 2	Cytoplasm	enzyme
-6.859	A_42_P541962	C1QTNF4	C1q and TNF related 4	Extracellular Space	other
-6.967	A_44_P870348	SLC35D3	solute carrier family 35 member D3	Cytoplasm	other
-7.283	A_44_P1071620	MMP27	matrix metallopeptidase 27	Cytoplasm	peptidase
-7.365	A_44_P135066	GALNT13	polypeptide N-acetylgalactosaminyltransferase 13	Cytoplasm	enzyme
-7.551	A_44_P157881	FMO2	flavin containing monooxygenase 2	Cytoplasm	enzyme
-7.897	A_42_P737738	SLC18A3	solute carrier family 18 member A3	Plasma Membrane	transporter
-7.933	A_44_P263037	PNPLA3	patatin like phospholipase domain containing 3	Cytoplasm	enzyme
-8.725	A_44_P1042952	Hrk	harakiri, BCL2 interacting protein (contains only BH3 domain)	Cytoplasm	other
-8.749	A_44_P400756	CSMD1	CUB and Sushi multiple domains 1	Plasma Membrane	other
-8.965	A_44_P193130	SFTPA1	surfactant protein A1	Extracellular Space	transporter
-11.883	A_44_P111489	ELOVL6	ELOVL fatty acid elongase 6	Cytoplasm	enzyme
-15.587	A_44_P550145	SCD	stearoyl-CoA desaturase	Cytoplasm	enzyme
-41.614	A_44_P321009	CYP1A1	cytochrome P450 family 1 subfamily A member 1	Cytoplasm	enzyme

## Sheet: 7d
Expr Fold Change	ID	Symbol	Entrez Gene Name	Location	Type(s)
159.533	A_44_P555271	MMP12	matrix metallopeptidase 12	Extracellular Space	peptidase
89.731	A_44_P151156	Kng1/Kng2	kininogen 2	Extracellular Space	other
84.349	A_44_P473510	VSIG4	V-set and immunoglobulin domain containing 4	Plasma Membrane	other
68.617	A_44_P332790	TRH	thyrotropin releasing hormone	Extracellular Space	other
62.412	A_44_P377266	OLR1	oxidized low density lipoprotein receptor 1	Plasma Membrane	transmembrane receptor
53.089	A_44_P448431	CD8A	CD8a molecule	Plasma Membrane	other
49.288	A_44_P112546	MRAP2	melanocortin 2 receptor accessory protein 2	Cytoplasm	other
46.275	A_44_P340261	Stra6l	STRA6-like	Plasma Membrane	other
41.383	A_42_P525886	CRABP1	cellular retinoic acid binding protein 1	Cytoplasm	transporter
37.548	A_44_P142043	OR6K6	olfactory receptor family 6 subfamily K member 6	Plasma Membrane	G-protein coupled receptor
36.597	A_43_P11861	DIO3	iodothyronine deiodinase 3	Plasma Membrane	enzyme
36.278	A_44_P930826	Clec2d (includes others)	C-type lectin domain family 2, member D	Plasma Membrane	other
35.034	A_44_P160841	Calcb	calcitonin-related polypeptide, beta	Extracellular Space	other
34.004	A_44_P107596	CTSW	cathepsin W	Cytoplasm	peptidase
32.598	A_44_P276538	LILRB4	leukocyte immunoglobulin like receptor B4	Plasma Membrane	other
30.73	A_44_P485051	Siglech	sialic acid binding Ig-like lectin H	Plasma Membrane	other
30.364	A_44_P716457	LOC100911216/Pcsk1	proprotein convertase subtilisin/kexin type 1	Plasma Membrane	peptidase
27.779	A_44_P578061	MAB21L3	mab-21 like 3	Other	other
26.251	A_44_P269457	GPR83	G protein-coupled receptor 83	Plasma Membrane	G-protein coupled receptor
25.825	A_43_P11590	MMP7	matrix metallopeptidase 7	Extracellular Space	peptidase
25.622	A_43_P11672	IL1RL1	interleukin 1 receptor like 1	Plasma Membrane	transmembrane receptor
24.657	A_43_P15638	TNC	tenascin C	Extracellular Space	other
24.056	A_44_P325522	LMNB1	lamin B1	Nucleus	other
23.154	A_43_P13420	SPON1	spondin 1	Extracellular Space	other
23.08	A_42_P495969	Apoc1	apolipoprotein C1	Extracellular Space	other
23.032	A_44_P501112	MMP9	matrix metallopeptidase 9	Extracellular Space	peptidase
22.877	A_44_P114207	HK3	hexokinase 3	Cytoplasm	kinase
22.306	A_44_P704618	FAM167A	family with sequence similarity 167 member A	Cytoplasm	other
21.83	A_42_P480723	CD8B	CD8b molecule	Plasma Membrane	other
21.799	A_44_P163242	EPCAM	epithelial cell adhesion molecule	Plasma Membrane	other
21.696	A_44_P411954	CD2	CD2 molecule	Plasma Membrane	transmembrane receptor
21.345	A_44_P371339	IL6	interleukin 6	Extracellular Space	cytokine
20.298	A_44_P458855	PTPRN	protein tyrosine phosphatase, receptor type N	Plasma Membrane	phosphatase
20.143	A_44_P1027971	GPR84	G protein-coupled receptor 84	Plasma Membrane	G-protein coupled receptor
19.856	A_44_P850143	TLX2	T-cell leukemia homeobox 2	Nucleus	transcription regulator
19.605	A_44_P292547	OR5AP2	olfactory receptor family 5 subfamily AP member 2	Plasma Membrane	G-protein coupled receptor
19.495	A_44_P121517	CD180	CD180 molecule	Plasma Membrane	other
19.157	A_44_P396842	UCN2	urocortin 2	Extracellular Space	other
19.067	A_42_P686234	Muc4	mucin 4	Plasma Membrane	other
18.659	A_44_P264694	APOC4	apolipoprotein C4	Extracellular Space	transporter
17.656	A_44_P1058520	SH2D1A	SH2 domain containing 1A	Cytoplasm	other
17.621	A_44_P640180	ZC2HC1B	zinc finger C2HC-type containing 1B	Other	other
17.386	A_44_P103225	CD3E	CD3e molecule	Plasma Membrane	transmembrane receptor
17.282	A_43_P13048	TNFSF11	TNF superfamily member 11	Extracellular Space	cytokine
16.209	A_43_P13246	XCL1	X-C motif chemokine ligand 1	Extracellular Space	cytokine
16.046	A_44_P260663	PARVG	parvin gamma	Cytoplasm	other
15.538	A_44_P563229	Klrb1f	killer cell lectin-like receptor subfamily B member 1F	Plasma Membrane	other
15.149	A_43_P13203	Wfdc17/Wfdc18	WAP four-disulfide core domain 18	Extracellular Space	other
14.704	A_44_P438272	Crisp1/Crisp3	cysteine-rich secretory protein 1	Extracellular Space	other
14.433	A_44_P135094	Art2b	ADP-ribosyltransferase 2b	Plasma Membrane	enzyme
14.348	A_44_P514627	ADGRL3	adhesion G protein-coupled receptor L3	Plasma Membrane	G-protein coupled receptor
14.307	A_43_P12276	VAX1	ventral anterior homeobox 1	Nucleus	transcription regulator
14.289	A_42_P606126	MMP13	matrix metallopeptidase 13	Extracellular Space	peptidase
13.873	A_44_P405374	LOC290071	similar to T cell receptor V-alpha J-alpha	Other	other
13.604	A_44_P990376	GPNMB	glycoprotein nmb	Plasma Membrane	enzyme
13.578	A_44_P550938	PCDH11X	protocadherin 11 X-linked	Plasma Membrane	other
13.117	A_44_P247281	CXCL14	C-X-C motif chemokine ligand 14	Extracellular Space	cytokine
13.099	A_44_P424188	PLCXD3	phosphatidylinositol specific phospholipase C X domain containing 3	Other	other
13.093	A_42_P693316	CFI	complement factor I	Extracellular Space	peptidase
13.037	A_44_P168875	TMEM108	transmembrane protein 108	Plasma Membrane	other
12.643	A_44_P730837	DSG2	desmoglein 2	Plasma Membrane	other
12.576	A_44_P556989	NGFR	nerve growth factor receptor	Plasma Membrane	transmembrane receptor
12.568	A_44_P153516	SLC18A2	solute carrier family 18 member A2	Plasma Membrane	transporter
12.317	A_42_P818323	GFRA3	GDNF family receptor alpha 3	Plasma Membrane	transmembrane receptor
12.059	A_44_P468468	LBP	lipopolysaccharide binding protein	Plasma Membrane	transporter
12.045	A_42_P500080	NKG7	natural killer cell granule protein 7	Plasma Membrane	other
11.922	A_44_P994692	ZAP70	zeta chain of T-cell receptor associated protein kinase 70	Plasma Membrane	kinase
11.914	A_44_P497011	TRB	T-cell receptor beta locus	Plasma Membrane	transmembrane receptor
11.66	A_44_P484730	OR8H2	olfactory receptor family 8 subfamily H member 2	Plasma Membrane	G-protein coupled receptor
11.527	A_44_P604824	PRSS35	protease, serine 35	Extracellular Space	peptidase
11.349	A_43_P13004	CDH17	cadherin 17	Plasma Membrane	transporter
11.327	A_44_P409803	CD5	CD5 molecule	Plasma Membrane	transmembrane receptor
10.9	A_44_P185355	BCL11B	B-cell CLL/lymphoma 11B	Nucleus	transcription regulator
10.899	A_44_P304323	CCL5	C-C motif chemokine ligand 5	Extracellular Space	cytokine
10.892	A_44_P409840	CCL17	C-C motif chemokine ligand 17	Extracellular Space	cytokine
10.884	A_44_P355958	Olfr876	olfactory receptor 876	Plasma Membrane	G-protein coupled receptor
10.684	A_44_P372587	CX3CR1	C-X3-C motif chemokine receptor 1	Plasma Membrane	G-protein coupled receptor
10.677	A_43_P22638	PAPPA	pappalysin 1	Extracellular Space	peptidase
10.588	A_44_P854174	C3orf80	chromosome 3 open reading frame 80	Other	other
10.555	A_44_P714618	Arl4c	ADP-ribosylation factor like GTPase 4C	Cytoplasm	other
10.549	A_43_P11086	UPK1B	uroplakin 1B	Plasma Membrane	other
10.523	A_44_P147062	MOXD1	monooxygenase DBH like 1	Cytoplasm	enzyme
10.438	A_43_P15961	Clca3b	chloride channel accessory 3B	Other	ion channel
10.349	A_42_P598304	KLRB1	killer cell lectin like receptor B1	Plasma Membrane	transmembrane receptor
10.262	A_42_P466283	GZMK	granzyme K	Cytoplasm	peptidase
10.161	A_42_P527724	FCN1	ficolin 1	Extracellular Space	peptidase
10.082	A_43_P22811	CD6	CD6 molecule	Plasma Membrane	transmembrane receptor
10.005	A_44_P255149	Klrc2/Klrc3	killer cell lectin-like receptor subfamily C, member 2	Plasma Membrane	transmembrane receptor
9.972	A_42_P693821	FOSL1	FOS like 1, AP-1 transcription factor subunit	Nucleus	transcription regulator
9.816	A_44_P183638	Pirb	paired Ig-like receptor B	Plasma Membrane	other
9.768	A_44_P295563	COL7A1	collagen type VII alpha 1 chain	Extracellular Space	other
9.696	A_44_P766913	TRPM2	transient receptor potential cation channel subfamily M member 2	Plasma Membrane	ion channel
9.691	A_44_P470619	SRXN1	sulfiredoxin 1	Cytoplasm	enzyme
9.688	A_44_P255817	PRAM1	PML-RARA regulated adaptor molecule 1	Other	other
9.643	A_44_P192393	ACER1	alkaline ceramidase 1	Cytoplasm	enzyme
9.582	A_44_P404843	CXCR3	C-X-C motif chemokine receptor 3	Plasma Membrane	G-protein coupled receptor
9.58	A_44_P327890	TFAP2C	transcription factor AP-2 gamma	Nucleus	transcription regulator
9.566	A_42_P799702	AARD	alanine and arginine rich domain containing protein	Other	other
9.552	A_44_P1050595	CELA1	chymotrypsin like elastase family member 1	Extracellular Space	peptidase
9.461	A_42_P749184	PENK	proenkephalin	Extracellular Space	other
9.402	A_44_P372254	Slpi (includes others)	secretory leukocyte peptidase inhibitor	Cytoplasm	other
9.343	A_43_P11543	KLRD1	killer cell lectin like receptor D1	Plasma Membrane	transmembrane receptor
9.317	A_44_P237153	BIRC5	baculoviral IAP repeat containing 5	Cytoplasm	other
9.283	A_44_P462661	IL1RN	interleukin 1 receptor antagonist	Extracellular Space	cytokine
9.188	A_44_P536089	Klre1	killer cell lectin-like receptor family E member 1	Plasma Membrane	transmembrane receptor
9.167	A_44_P101361	Hmga2	high mobility group AT-hook 2	Nucleus	enzyme
9.017	A_44_P163301	Olr1171/Olr1177	olfactory receptor 1177	Other	other
8.942	A_44_P452222	ITGAL	integrin subunit alpha L	Plasma Membrane	transmembrane receptor
8.915	A_44_P184297	RUNX2	runt related transcription factor 2	Nucleus	transcription regulator
8.915	A_44_P1004392	SIDT1	SID1 transmembrane family member 1	Other	other
8.912	A_44_P248506	IFNE	interferon epsilon	Extracellular Space	cytokine
8.782	A_42_P663871	GZMA	granzyme A	Cytoplasm	peptidase
8.705	A_44_P150185	LTBP2	latent transforming growth factor beta binding protein 2	Extracellular Space	other
8.622	A_42_P579174	CD3D	CD3d molecule	Plasma Membrane	transmembrane receptor
8.613	A_44_P624451	C10orf128	chromosome 10 open reading frame 128	Other	other
8.396	A_44_P365351	Olr1346	olfactory receptor 1346	Plasma Membrane	G-protein coupled receptor
8.385	A_43_P11654	PNOC	prepronociceptin	Extracellular Space	other
8.217	A_44_P259851	OR4X1	olfactory receptor family 4 subfamily X member 1 (gene/pseudogene)	Plasma Membrane	G-protein coupled receptor
8.198	A_44_P290786	LRIT3	leucine rich repeat, Ig-like and transmembrane domains 3	Other	other
8.187	A_44_P487000	Olfr1181/Olfr1182	olfactory receptor 1181	Plasma Membrane	G-protein coupled receptor
8.17	A_44_P469527	TMEM200A	transmembrane protein 200A	Other	other
8.111	A_44_P431296	GPR18	G protein-coupled receptor 18	Plasma Membrane	G-protein coupled receptor
8.06	A_44_P575152	C16orf96	chromosome 16 open reading frame 96	Other	other
8.052	A_44_P340587	MPEG1	macrophage expressed 1	Cytoplasm	other
8.005	A_44_P311096	ABCB4	ATP binding cassette subfamily B member 4	Plasma Membrane	transporter
7.957	A_44_P974179	LCA5L	LCA5L, lebercilin like	Extracellular Space	other
7.94	A_44_P358151	Sectm1b	secreted and transmembrane 1B	Extracellular Space	cytokine
7.875	A_43_P14894	Nppb	natriuretic peptide type B	Other	other
7.848	A_44_P463899	PILRB	paired immunoglobin-like type 2 receptor beta	Plasma Membrane	other
7.764	A_44_P496327	PRF1	perforin 1	Cytoplasm	transporter
7.73	A_44_P259977	ARNTL2	aryl hydrocarbon receptor nuclear translocator like 2	Nucleus	transcription regulator
7.654	A_42_P791677	AREG	amphiregulin	Extracellular Space	growth factor
7.62	A_44_P266892	Olfr711	olfactory receptor 711	Plasma Membrane	G-protein coupled receptor
7.602	A_44_P1021106	LMO4	LIM domain only 4	Nucleus	transcription regulator
7.59	A_44_P440302	Olfr1179	olfactory receptor 1179	Plasma Membrane	G-protein coupled receptor
7.572	A_44_P438117	RGS1	regulator of G protein signaling 1	Plasma Membrane	other
7.538	A_43_P21322	HCLS1	hematopoietic cell-specific Lyn substrate 1	Nucleus	other
7.526	A_43_P11809	UMOD	uromodulin	Extracellular Space	other
7.518	A_44_P335219	IL21R	interleukin 21 receptor	Plasma Membrane	transmembrane receptor
7.497	A_44_P452070	OR51I1	olfactory receptor family 51 subfamily I member 1	Plasma Membrane	G-protein coupled receptor
7.465	A_44_P265709	IL2RB	interleukin 2 receptor subunit beta	Plasma Membrane	transmembrane receptor
7.455	A_44_P606174	BCL2L14	BCL2 like 14	Cytoplasm	other
7.418	A_44_P1035483	THBS2	thrombospondin 2	Extracellular Space	other
7.378	A_42_P787160	Ptprv	protein tyrosine phosphatase, receptor type, V	Other	other
7.346	A_44_P507053	LOC690020	similar to killer cell lectin-like receptor, subfamily A, member 17	Other	other
7.339	A_44_P391118	Olfr1324	olfactory receptor 1324	Plasma Membrane	G-protein coupled receptor
7.3	A_44_P290953	CLVS1	clavesin 1	Cytoplasm	other
7.278	A_44_P130818	LGI3	leucine rich repeat LGI family member 3	Extracellular Space	other
7.239	A_43_P19999	Fcrls	Fc receptor-like S, scavenger receptor	Plasma Membrane	other
7.239	A_44_P308827	Olfr582	olfactory receptor 582	Plasma Membrane	G-protein coupled receptor
7.195	A_44_P226771	MAPK8IP3	mitogen-activated protein kinase 8 interacting protein 3	Cytoplasm	other
7.147	A_44_P452632	IRF8	interferon regulatory factor 8	Nucleus	transcription regulator
7.136	A_43_P18698	SEPT1	septin 1	Cytoplasm	enzyme
7.116	A_43_P13122	Gucy2d	guanylate cyclase 2d	Other	enzyme
7.096	A_44_P224810	NLRP10	NLR family pyrin domain containing 10	Other	other
7.093	A_44_P319979	VMP1	vacuole membrane protein 1	Plasma Membrane	other
6.99	A_44_P543548	TRA2B	transformer 2 beta homolog	Nucleus	other
6.987	A_44_P481971	NRP1	neuropilin 1	Plasma Membrane	transmembrane receptor
6.957	A_44_P292934	Ms4a4c	membrane-spanning 4-domains, subfamily A, member 4C	Other	other
6.94	A_42_P732259	FAM26F	family with sequence similarity 26 member F	Other	other
6.917	A_44_P179904	SH2D2A	SH2 domain containing 2A	Cytoplasm	other
6.896	A_44_P154176	Zim1	zinc finger, imprinted 1	Nucleus	other
6.825	A_44_P422356	Trim80	tripartite motif-containing 80	Other	other
6.811	A_44_P480925	LOC728392	uncharacterized LOC728392	Other	other
6.799	A_44_P266817	Klra22	killer cell lectin-like receptor subfamily A, member 22	Other	other
6.762	A_44_P299565	Mcpt1	mast cell protease 1	Other	peptidase
6.721	A_44_P201276	Lilrb3	leukocyte immunoglobulin like receptor B3	Other	other
6.655	A_44_P421727	CARD11	caspase recruitment domain family member 11	Cytoplasm	kinase
6.648	A_44_P344492	STAT4	signal transducer and activator of transcription 4	Nucleus	transcription regulator
6.635	A_44_P382226	SOX4	SRY-box 4	Nucleus	transcription regulator
6.626	A_44_P252517	Havcr1	hepatitis A virus cellular receptor 1	Plasma Membrane	other
6.614	A_43_P22979	TYRP1	tyrosinase related protein 1	Cytoplasm	enzyme
6.59	A_44_P298049	NCF1	neutrophil cytosolic factor 1	Cytoplasm	enzyme
6.477	A_44_P792845	RUNX3	runt related transcription factor 3	Nucleus	transcription regulator
6.437	A_44_P144741	BLNK	B-cell linker	Cytoplasm	other
6.352	A_43_P16370	OR4C45	olfactory receptor family 4 subfamily C member 45 (gene/pseudogene)	Plasma Membrane	G-protein coupled receptor
6.308	A_44_P928825	MSR1	macrophage scavenger receptor 1	Plasma Membrane	transmembrane receptor
6.298	A_44_P852315	FIBIN	fin bud initiation factor homolog (zebrafish)	Cytoplasm	other
6.293	A_44_P363071	Olfr283	olfactory receptor 283	Plasma Membrane	G-protein coupled receptor
6.277	A_42_P591344	ITGB2	integrin subunit beta 2	Plasma Membrane	transmembrane receptor
6.274	A_44_P311364	Clca3a1/Clca3a2	chloride channel accessory 3A1	Plasma Membrane	ion channel
6.251	A_43_P11749	HCK	HCK proto-oncogene, Src family tyrosine kinase	Cytoplasm	kinase
6.239	A_44_P1038296	CD68	CD68 molecule	Plasma Membrane	other
6.228	A_44_P409820	FASLG	Fas ligand	Extracellular Space	cytokine
6.201	A_44_P314431	BICDL2	BICD family like cargo adaptor 2	Other	other
6.179	A_43_P15819	PRSS22	protease, serine 22	Extracellular Space	peptidase
6.155	A_42_P801831	FBLN1	fibulin 1	Extracellular Space	other
6.099	A_44_P405381	C1QTNF3	C1q and TNF related 3	Extracellular Space	other
6.089	A_43_P12274	Lst1	leukocyte specific transcript 1	Cytoplasm	other
6.068	A_44_P438060	GNA15	G protein subunit alpha 15	Plasma Membrane	enzyme
6.033	A_44_P247815	Olfr199/Olfr201	olfactory receptor 201	Plasma Membrane	G-protein coupled receptor
6.032	A_44_P161233	IL18	interleukin 18	Extracellular Space	cytokine
6.032	A_43_P15803	LOC681290	uncharacterized LOC681290	Other	other
6.008	A_44_P546123	MCM5	minichromosome maintenance complex component 5	Nucleus	enzyme
5.992	A_42_P602511	KCNN4	potassium calcium-activated channel subfamily N member 4	Plasma Membrane	ion channel
5.889	A_44_P410469	B430306N03Rik	RIKEN cDNA B430306N03 gene	Other	other
5.855	A_44_P633041	LPAR4	lysophosphatidic acid receptor 4	Plasma Membrane	transmembrane receptor
5.83	A_44_P355702	IGFBP3	insulin like growth factor binding protein 3	Extracellular Space	other
5.793	A_44_P494754	CLSPN	claspin	Nucleus	other
5.771	A_44_P1023538	C3	complement C3	Extracellular Space	peptidase
5.743	A_44_P433935	PLAC1	placenta specific 1	Plasma Membrane	other
5.727	A_44_P286409	TTK	TTK protein kinase	Nucleus	kinase
5.726	A_44_P550768	LOC102555173	uncharacterized LOC102555173	Other	other
5.716	A_43_P12403	FGR	FGR proto-oncogene, Src family tyrosine kinase	Nucleus	kinase
5.657	A_44_P1013006	STEAP1	STEAP family member 1	Plasma Membrane	transporter
5.604	A_44_P228942	RUNX1	runt related transcription factor 1	Nucleus	transcription regulator
5.588	A_43_P10939	PCLAF	PCNA clamp associated factor	Nucleus	other
5.586	A_44_P652447	CXCR6	C-X-C motif chemokine receptor 6	Plasma Membrane	G-protein coupled receptor
5.579	A_43_P23155	MCM10	minichromosome maintenance 10 replication initiation factor	Nucleus	other
5.573	A_44_P232205	BIN2	bridging integrator 2	Plasma Membrane	other
5.553	A_44_P698466	LRRTM2	leucine rich repeat transmembrane neuronal 2	Plasma Membrane	other
5.539	A_42_P598412	APOBEC1	apolipoprotein B mRNA editing enzyme catalytic subunit 1	Cytoplasm	enzyme
5.485	A_44_P477819	NRG1	neuregulin 1	Plasma Membrane	growth factor
5.474	A_44_P932384	PLXNC1	plexin C1	Plasma Membrane	transmembrane receptor
5.44	A_42_P601961	SUSD3	sushi domain containing 3	Plasma Membrane	other
5.409	A_44_P309179	DTL	denticleless E3 ubiquitin protein ligase homolog	Nucleus	other
5.398	A_44_P511304	LCK	LCK proto-oncogene, Src family tyrosine kinase	Cytoplasm	kinase
5.397	A_43_P10690	Klra17 (includes others)	similar to immunoreceptor Ly49si3	Other	other
5.345	A_44_P1009603	GTSE1	G2 and S-phase expressed 1	Cytoplasm	other
5.308	A_44_P668582	ARHGAP25	Rho GTPase activating protein 25	Cytoplasm	other
5.293	A_43_P11574	ST8SIA1	ST8 alpha-N-acetyl-neuraminide alpha-2,8-sialyltransferase 1	Cytoplasm	enzyme
5.286	A_44_P760780	MCM3	minichromosome maintenance complex component 3	Nucleus	enzyme
5.277	A_44_P1047933	MAPK1	mitogen-activated protein kinase 1	Cytoplasm	kinase
5.26	A_44_P487764	C1QA	complement C1q A chain	Extracellular Space	peptidase
5.246	A_44_P976687	CENPW	centromere protein W	Nucleus	other
5.219	A_43_P12208	Basp1	brain abundant, membrane attached signal protein 1	Cytoplasm	transcription regulator
5.177	A_44_P515317	IGFBP4	insulin like growth factor binding protein 4	Extracellular Space	other
5.176	A_44_P463309	PLK1	polo like kinase 1	Nucleus	kinase
5.152	A_44_P480157	KIF4A	kinesin family member 4A	Nucleus	other
5.124	A_44_P255912	4930438A08Rik	RIKEN cDNA 4930438A08 gene	Other	other
5.107	A_44_P482476	FCGR2A	Fc fragment of IgG receptor IIa	Plasma Membrane	transmembrane receptor
5.105	A_44_P332505	ACPP	acid phosphatase, prostate	Extracellular Space	phosphatase
5.088	A_44_P333910	Mcpt4	mast cell protease 4	Other	peptidase
5.083	A_44_P544113	ILDR1	immunoglobulin like domain containing receptor 1	Plasma Membrane	transmembrane receptor
5.082	A_44_P1042360	Clec4a3	C-type lectin domain family 4, member a3	Other	other
5.078	A_44_P220455	CSF3R	colony stimulating factor 3 receptor	Plasma Membrane	transmembrane receptor
5.028	A_44_P323106	ABCA1	ATP binding cassette subfamily A member 1	Plasma Membrane	transporter
5.017	A_44_P743669	SEMA3E	semaphorin 3E	Extracellular Space	other
4.993	A_44_P438922	KLHL6	kelch like family member 6	Other	other
4.993	A_44_P373285	SCUBE3	signal peptide, CUB domain and EGF like domain containing 3	Plasma Membrane	other
4.98	A_44_P173330	SNX20	sorting nexin 20	Cytoplasm	other
4.97	A_44_P918225	SLC8A1	solute carrier family 8 member A1	Plasma Membrane	transporter
4.96	A_44_P254984	PNLIP	pancreatic lipase	Extracellular Space	enzyme
4.948	A_44_P470824	TRIP13	thyroid hormone receptor interactor 13	Cytoplasm	transcription regulator
4.926	A_44_P210268	Olfr281	olfactory receptor 281	Plasma Membrane	G-protein coupled receptor
4.896	A_44_P945669	DSN1	DSN1 homolog, MIS12 kinetochore complex component	Nucleus	other
4.891	A_44_P1039249	DOK3	docking protein 3	Cytoplasm	other
4.876	A_44_P128013	MRGPRX3	MAS related GPR family member X3	Plasma Membrane	G-protein coupled receptor
4.874	A_44_P777359	C1orf162	chromosome 1 open reading frame 162	Other	transporter
4.854	A_44_P318861	WDFY4	WDFY family member 4	Other	other
4.852	A_44_P435618	EDNRB	endothelin receptor type B	Plasma Membrane	G-protein coupled receptor
4.847	A_43_P19763	TLR2	toll like receptor 2	Plasma Membrane	transmembrane receptor
4.846	A_42_P512838	Trem2	triggering receptor expressed on myeloid cells 2	Other	other
4.843	A_44_P439493	PLA2G10	phospholipase A2 group X	Cytoplasm	enzyme
4.832	A_42_P679371	CORO1A	coronin 1A	Cytoplasm	other
4.831	A_43_P17059	CRLF1	cytokine receptor like factor 1	Extracellular Space	other
4.83	A_44_P388755	KIF15	kinesin family member 15	Nucleus	other
4.81	A_43_P20126	CENPH	centromere protein H	Nucleus	other
4.798	A_44_P716774	EML5	echinoderm microtubule associated protein like 5	Cytoplasm	other
4.796	A_44_P213100	PTPN22	protein tyrosine phosphatase, non-receptor type 22	Cytoplasm	phosphatase
4.79	A_44_P426788	PMEPA1	prostate transmembrane protein, androgen induced 1	Plasma Membrane	other
4.768	A_43_P12148	TOP2A	topoisomerase (DNA) II alpha	Nucleus	enzyme
4.746	A_44_P866810	TEAD2	TEA domain transcription factor 2	Nucleus	transcription regulator
4.744	A_43_P17687	TACC3	transforming acidic coiled-coil containing protein 3	Nucleus	other
4.742	A_43_P10020	LYZ	lysozyme	Extracellular Space	enzyme
4.731	A_42_P458530	RIPK3	receptor interacting serine/threonine kinase 3	Plasma Membrane	kinase
4.719	A_43_P17490	RRM2	ribonucleotide reductase regulatory subunit M2	Nucleus	enzyme
4.712	A_44_P330783	Trg	T cell receptor gamma locus	Plasma Membrane	other
4.704	A_44_P405232	TMEM119	transmembrane protein 119	Cytoplasm	other
4.699	A_44_P763036	IL10RA	interleukin 10 receptor subunit alpha	Plasma Membrane	transmembrane receptor
4.694	A_44_P365642	KLK5	kallikrein related peptidase 5	Extracellular Space	peptidase
4.682	A_44_P299933	Ncaph	non-SMC condensin I complex, subunit H	Cytoplasm	other
4.668	A_44_P461857	LOC102547986	40S ribosomal protein S2-like	Other	other
4.659	A_44_P311136	VAV1	vav guanine nucleotide exchange factor 1	Nucleus	transcription regulator
4.653	A_44_P270468	SLC15A3	solute carrier family 15 member 3	Cytoplasm	transporter
4.647	A_44_P853326	MEX3A	mex-3 RNA binding family member A	Cytoplasm	other
4.63	A_43_P18226	MYO1F	myosin IF	Cytoplasm	other
4.625	A_44_P140514	CENPA	centromere protein A	Nucleus	other
4.623	A_44_P500961	GDNF	glial cell derived neurotrophic factor	Extracellular Space	growth factor
4.613	A_44_P263105	LIMD2	LIM domain containing 2	Other	other
4.589	A_44_P355928	CTSS	cathepsin S	Cytoplasm	peptidase
4.572	A_42_P676304	Ifitm1	interferon induced transmembrane protein 1	Other	other
4.565	A_44_P189496	FCGR1A	Fc fragment of IgG receptor Ia	Plasma Membrane	transmembrane receptor
4.564	A_43_P14872	SDC1	syndecan 1	Plasma Membrane	enzyme
4.56	A_44_P700270	PIMREG	PICALM interacting mitotic regulator	Nucleus	other
4.553	A_44_P428420	CTSZ	cathepsin Z	Cytoplasm	peptidase
4.54	A_44_P250368	TK1	thymidine kinase 1	Cytoplasm	kinase
4.527	A_44_P419810	LRR1	leucine rich repeat protein 1	Other	enzyme
4.524	A_44_P746420	ARL11	ADP ribosylation factor like GTPase 11	Other	other
4.519	A_44_P436280	PLTP	phospholipid transfer protein	Extracellular Space	enzyme
4.516	A_42_P580844	CDK1	cyclin dependent kinase 1	Nucleus	kinase
4.513	A_44_P678814	OLFML2A	olfactomedin like 2A	Extracellular Space	other
4.51	A_44_P510940	MKI67	marker of proliferation Ki-67	Nucleus	other
4.508	A_44_P1039616	CD300C	CD300c molecule	Plasma Membrane	transmembrane receptor
4.505	A_44_P359587	PGR	progesterone receptor	Nucleus	ligand-dependent nuclear receptor
4.493	A_44_P326031	ATP8A2	ATPase phospholipid transporting 8A2	Plasma Membrane	transporter
4.492	A_43_P18241	CENPU	centromere protein U	Nucleus	other
4.479	A_42_P814235	P2RY6	pyrimidinergic receptor P2Y6	Plasma Membrane	G-protein coupled receptor
4.47	A_44_P483728	RPS6KA1	ribosomal protein S6 kinase A1	Cytoplasm	kinase
4.459	A_44_P515852	TPX2	TPX2, microtubule nucleation factor	Nucleus	other
4.439	A_44_P276803	ZNF341	zinc finger protein 341	Nucleus	other
4.436	A_44_P365611	GPR31	G protein-coupled receptor 31	Plasma Membrane	G-protein coupled receptor
4.422	A_44_P114537	Celf4	CUGBP, Elav-like family member 4	Nucleus	other
4.417	A_44_P367688	HLA-DRA	major histocompatibility complex, class II, DR alpha	Plasma Membrane	transmembrane receptor
4.405	A_43_P15962	CCNA2	cyclin A2	Nucleus	other
4.401	A_44_P964460	ITK	IL2 inducible T-cell kinase	Cytoplasm	kinase
4.401	A_42_P809101	TCTEX1D1	Tctex1 domain containing 1	Other	other
4.376	A_44_P398729	SBNO2	strawberry notch homolog 2	Other	transcription regulator
4.375	A_44_P276338	MCM6	minichromosome maintenance complex component 6	Nucleus	enzyme
4.353	A_44_P501536	ARMC4	armadillo repeat containing 4	Extracellular Space	other
4.35	A_44_P366648	STIL	SCL/TAL1 interrupting locus	Nucleus	other
4.349	A_44_P956203	SASH3	SAM and SH3 domain containing 3	Cytoplasm	other
4.348	A_44_P125761	Olfr1346	olfactory receptor 1346	Plasma Membrane	G-protein coupled receptor
4.343	A_44_P808277	Ptk7	protein tyrosine kinase 7	Plasma Membrane	other
4.34	A_42_P768024	SPN	sialophorin	Plasma Membrane	transmembrane receptor
4.336	A_44_P210173	TNFRSF12A	TNF receptor superfamily member 12A	Plasma Membrane	transmembrane receptor
4.32	A_44_P403058	ANKLE1	ankyrin repeat and LEM domain containing 1	Cytoplasm	enzyme
4.316	A_44_P1014388	MMS22L	MMS22 like, DNA repair protein	Nucleus	other
4.295	A_44_P383555	C17orf53	chromosome 17 open reading frame 53	Other	other
4.295	A_44_P227065	KIF22	kinesin family member 22	Nucleus	other
4.286	A_44_P590505	C130050O18Rik	RIKEN cDNA C130050O18 gene	Other	other
4.284	A_44_P379360	FUT7	fucosyltransferase 7	Cytoplasm	enzyme
4.283	A_43_P15427	Sct	secretin	Extracellular Space	other
4.279	A_44_P852545	TMEM196	transmembrane protein 196	Other	other
4.278	A_42_P708181	KNTC1	kinetochore associated 1	Nucleus	other
4.258	A_44_P828142	IL7R	interleukin 7 receptor	Plasma Membrane	transmembrane receptor
4.247	A_43_P20133	SKIL	SKI like proto-oncogene	Nucleus	transcription regulator
4.234	A_44_P163731	GALNTL6	polypeptide N-acetylgalactosaminyltransferase-like 6	Other	other
4.217	A_44_P158533	Tmsbl1	thymosin beta-like protein 1	Cytoplasm	other
4.204	A_43_P15106	E2F8	E2F transcription factor 8	Nucleus	transcription regulator
4.202	A_42_P827359	MYBL2	MYB proto-oncogene like 2	Nucleus	transcription regulator
4.197	A_44_P276120	KISS1R	KISS1 receptor	Plasma Membrane	G-protein coupled receptor
4.175	A_44_P534089	CCNB1	cyclin B1	Cytoplasm	kinase
4.175	A_44_P500935	SBK1	SH3 domain binding kinase 1	Other	kinase
4.174	A_44_P997586	PLK4	polo like kinase 4	Cytoplasm	kinase
4.162	A_43_P16265	Olfr1353	olfactory receptor 1353	Plasma Membrane	G-protein coupled receptor
4.144	A_44_P1059985	SPC24	SPC24, NDC80 kinetochore complex component	Cytoplasm	other
4.122	A_44_P761837	KIF14	kinesin family member 14	Cytoplasm	enzyme
4.111	A_44_P311771	BUB1B	BUB1 mitotic checkpoint serine/threonine kinase B	Nucleus	kinase
4.111	A_44_P463805	CD247	CD247 molecule	Plasma Membrane	transmembrane receptor
4.106	A_44_P227604	EME1	essential meiotic structure-specific endonuclease 1	Nucleus	enzyme
4.096	A_42_P473314	LOC100909593/RT1-DMa	RT1 class II, locus DMa	Cytoplasm	other
4.095	A_44_P1019604	UBE2C	ubiquitin conjugating enzyme E2 C	Cytoplasm	enzyme
4.093	A_44_P1004323	COL18A1	collagen type XVIII alpha 1 chain	Extracellular Space	other
4.091	A_44_P372853	Psx1 (includes others)	placenta specific homeobox 1	Other	other
4.086	A_44_P206292	CDCA3	cell division cycle associated 3	Cytoplasm	other
4.085	A_44_P715645	POU2F2	POU class 2 homeobox 2	Nucleus	transcription regulator
4.074	A_44_P500803	HLA-DQB1	major histocompatibility complex, class II, DQ beta 1	Plasma Membrane	other
4.073	A_44_P507571	CCNE1	cyclin E1	Nucleus	transcription regulator
4.072	A_44_P393822	PLEKHO1	pleckstrin homology domain containing O1	Plasma Membrane	other
4.061	A_44_P262556	STAP1	signal transducing adaptor family member 1	Cytoplasm	other
4.052	A_44_P157314	CLEC4D	C-type lectin domain family 4 member D	Plasma Membrane	other
4.045	A_43_P15900	CCL22	C-C motif chemokine ligand 22	Extracellular Space	cytokine
4.028	A_43_P16181	H2-Eb2	histocompatibility 2, class II antigen E beta2	Other	other
4.022	A_44_P489862	TNFAIP8L2	TNF alpha induced protein 8 like 2	Cytoplasm	other
4.017	A_43_P15921	CCNF	cyclin F	Nucleus	enzyme
4.017	A_44_P577090	RAD51	RAD51 recombinase	Nucleus	enzyme
4.016	A_44_P1039606	CENPT	centromere protein T	Cytoplasm	other
4.012	A_44_P280963	KIFC1	kinesin family member C1	Nucleus	enzyme
4.001	A_44_P920519	GABRB2	gamma-aminobutyric acid type A receptor beta2 subunit	Plasma Membrane	ion channel
4	A_44_P459144	INHBA	inhibin beta A subunit	Extracellular Space	growth factor
3.987	A_44_P222166	CD86	CD86 molecule	Plasma Membrane	transmembrane receptor
3.983	A_44_P525969	CYBB	cytochrome b-245 beta chain	Cytoplasm	enzyme
3.959	A_44_P194806	BAALC	brain and acute leukemia, cytoplasmic	Cytoplasm	other
3.943	A_44_P515548	LOC685020/Pilra	paired immunoglobin-like type 2 receptor alpha	Cytoplasm	other
3.942	A_44_P859421	SH2D5	SH2 domain containing 5	Plasma Membrane	other
3.919	A_44_P1024773	DSCC1	DNA replication and sister chromatid cohesion 1	Nucleus	other
3.915	A_44_P1010816	SKA1	spindle and kinetochore associated complex subunit 1	Nucleus	other
3.907	A_44_P461544	CCNB2	cyclin B2	Cytoplasm	kinase
3.88	A_44_P291175	NDC80	NDC80, kinetochore complex component	Nucleus	other
3.877	A_44_P384506	PRAG1	PEAK1 related kinase activating pseudokinase 1	Nucleus	kinase
3.877	A_44_P233786	VGF	VGF nerve growth factor inducible	Extracellular Space	growth factor
3.873	A_44_P182479	KCNK4	potassium two pore domain channel subfamily K member 4	Plasma Membrane	ion channel
3.856	A_44_P333293	TRABD2B	TraB domain containing 2B	Plasma Membrane	peptidase
3.843	A_44_P376900	GPR171	G protein-coupled receptor 171	Plasma Membrane	G-protein coupled receptor
3.832	A_44_P809374	CLCF1	cardiotrophin like cytokine factor 1	Extracellular Space	cytokine
3.818	A_44_P421534	AIF1	allograft inflammatory factor 1	Nucleus	other
3.811	A_44_P182601	LOC103693634	uncharacterized LOC103693634	Other	other
3.808	A_43_P12450	FABP7	fatty acid binding protein 7	Cytoplasm	transporter
3.802	A_44_P402559	OR10X1	olfactory receptor family 10 subfamily X member 1 (gene/pseudogene)	Plasma Membrane	G-protein coupled receptor
3.789	A_44_P258008	FGD2	FYVE, RhoGEF and PH domain containing 2	Cytoplasm	other
3.787	A_44_P686987	GPR160	G protein-coupled receptor 160	Plasma Membrane	G-protein coupled receptor
3.785	A_42_P734868	KCNAB3	potassium voltage-gated channel subfamily A regulatory beta subunit 3	Plasma Membrane	ion channel
3.776	A_44_P236738	POLE2	DNA polymerase epsilon 2, accessory subunit	Nucleus	enzyme
3.769	A_44_P540511	PKIB	cAMP-dependent protein kinase inhibitor beta	Other	other
3.764	A_44_P372839	CENPE	centromere protein E	Nucleus	other
3.762	A_44_P478114	CDCA2	cell division cycle associated 2	Nucleus	other
3.762	A_43_P12296	DIO2	iodothyronine deiodinase 2	Cytoplasm	enzyme
3.754	A_44_P260072	TBXAS1	thromboxane A synthase 1	Plasma Membrane	enzyme
3.747	A_43_P22042	PLA2G7	phospholipase A2 group VII	Extracellular Space	enzyme
3.743	A_44_P517012	RAC2	ras-related C3 botulinum toxin substrate 2 (rho family, small GTP binding protein Rac2)	Cytoplasm	enzyme
3.739	A_44_P475159	THY1	Thy-1 cell surface antigen	Plasma Membrane	other
3.728	A_44_P142594	FAM110A	family with sequence similarity 110 member A	Other	other
3.725	A_44_P995681	MELK	maternal embryonic leucine zipper kinase	Cytoplasm	kinase
3.719	A_44_P140314	CDC25C	cell division cycle 25C	Nucleus	phosphatase
3.717	A_44_P266765	Cyp2d1/Cyp2d5	cytochrome P450, family 2, subfamily d, polypeptide 1	Cytoplasm	enzyme
3.714	A_44_P1026848	CRYBA4	crystallin beta A4	Other	other
3.711	A_44_P478515	FMNL3	formin like 3	Cytoplasm	other
3.708	A_44_P144591	CTHRC1	collagen triple helix repeat containing 1	Extracellular Space	other
3.707	A_44_P312089	NEURL3	neuralized E3 ubiquitin protein ligase 3	Other	enzyme
3.693	A_44_P551075	NFAM1	NFAT activating protein with ITAM motif 1	Plasma Membrane	transmembrane receptor
3.692	A_43_P12125	JUNB	JunB proto-oncogene, AP-1 transcription factor subunit	Nucleus	transcription regulator
3.689	A_43_P22080	LCP1	lymphocyte cytosolic protein 1	Cytoplasm	other
3.672	A_42_P585750	CD300LD	CD300 molecule like family member d	Plasma Membrane	other
3.667	A_44_P217744	LOC100911403/Ms4a4a	membrane-spanning 4-domains, subfamily A, member 4A	Other	other
3.667	A_42_P493301	POU3F1	POU class 3 homeobox 1	Nucleus	transcription regulator
3.664	A_44_P507469	MYOF	myoferlin	Nucleus	other
3.649	A_44_P1040503	PCTP	phosphatidylcholine transfer protein	Cytoplasm	transporter
3.638	A_44_P394636	INPP5D	inositol polyphosphate-5-phosphatase D	Cytoplasm	phosphatase
3.624	A_44_P496864	SEMA4A	semaphorin 4A	Plasma Membrane	other
3.614	A_42_P735417	FCGR2B	Fc fragment of IgG receptor IIb	Plasma Membrane	transmembrane receptor
3.608	A_44_P223446	MCM2	minichromosome maintenance complex component 2	Nucleus	enzyme
3.601	A_42_P626008	KNSTRN	kinetochore localized astrin/SPAG5 binding protein	Cytoplasm	other
3.584	A_44_P389590	CILP	cartilage intermediate layer protein	Extracellular Space	phosphatase
3.584	A_44_P506980	KCNK13	potassium two pore domain channel subfamily K member 13	Plasma Membrane	ion channel
3.583	A_42_P807697	TYROBP	TYRO protein tyrosine kinase binding protein	Plasma Membrane	transmembrane receptor
3.575	A_44_P253108	SPC25	SPC25, NDC80 kinetochore complex component	Cytoplasm	other
3.569	A_44_P730320	ECT2	epithelial cell transforming 2	Cytoplasm	other
3.565	A_44_P149916	ZNF275	zinc finger protein 275	Nucleus	other
3.559	A_44_P1005213	NUF2	NUF2, NDC80 kinetochore complex component	Nucleus	other
3.552	A_44_P593830	IL12RB1	interleukin 12 receptor subunit beta 1	Plasma Membrane	transmembrane receptor
3.545	A_44_P531324	ARHGAP9	Rho GTPase activating protein 9	Cytoplasm	other
3.543	A_43_P12257	ESM1	endothelial cell specific molecule 1	Extracellular Space	growth factor
3.54	A_44_P459666	TTC22	tetratricopeptide repeat domain 22	Other	other
3.538	A_43_P11472	HMOX1	heme oxygenase 1	Cytoplasm	enzyme
3.529	A_42_P785861	NIPSNAP3A	nipsnap homolog 3A	Nucleus	other
3.525	A_42_P762150	Ikzf1	IKAROS family zinc finger 1	Nucleus	transcription regulator
3.523	A_44_P518576	MIS18A	MIS18 kinetochore protein A	Nucleus	other
3.52	A_44_P1035190	BUB1	BUB1 mitotic checkpoint serine/threonine kinase	Nucleus	kinase
3.505	A_44_P249033	HMGA1	high mobility group AT-hook 1	Nucleus	transcription regulator
3.504	A_44_P849046	RAB32	RAB32, member RAS oncogene family	Cytoplasm	enzyme
3.499	A_44_P430532	CHSY1	chondroitin sulfate synthase 1	Cytoplasm	enzyme
3.497	A_44_P1042711	KIF20A	kinesin family member 20A	Cytoplasm	transporter
3.496	A_44_P492104	FERMT3	fermitin family member 3	Cytoplasm	enzyme
3.493	A_44_P467557	C1QB	complement C1q B chain	Extracellular Space	peptidase
3.485	A_44_P293904	SYK	spleen associated tyrosine kinase	Cytoplasm	kinase
3.484	A_44_P1037706	GLOD5	glyoxalase domain containing 5	Other	other
3.481	A_44_P332834	CEP72	centrosomal protein 72	Cytoplasm	other
3.472	A_44_P513059	SFRP1	secreted frizzled related protein 1	Plasma Membrane	transmembrane receptor
3.468	A_43_P14233	PTTG1	pituitary tumor-transforming 1	Nucleus	transcription regulator
3.467	A_42_P475885	PTPRZ1	protein tyrosine phosphatase, receptor type Z1	Plasma Membrane	phosphatase
3.466	A_44_P992516	ARHGAP45	Rho GTPase activating protein 45	Cytoplasm	transporter
3.459	A_44_P239281	CDC6	cell division cycle 6	Nucleus	other
3.433	A_44_P129749	Crabp2/LOC100911902	cellular retinoic acid binding protein 2	Cytoplasm	other
3.432	A_44_P160877	CFH	complement factor H	Extracellular Space	other
3.421	A_43_P10931	GPR68	G protein-coupled receptor 68	Plasma Membrane	G-protein coupled receptor
3.414	A_44_P513322	TXK	TXK tyrosine kinase	Cytoplasm	kinase
3.412	A_44_P500708	C1QC	complement C1q C chain	Extracellular Space	peptidase
3.409	A_44_P175078	COL27A1	collagen type XXVII alpha 1 chain	Extracellular Space	other
3.405	A_44_P594610	CDCA8	cell division cycle associated 8	Nucleus	other
3.402	A_44_P347340	CCDC15	coiled-coil domain containing 15	Cytoplasm	other
3.396	A_42_P565275	ASPM	abnormal spindle microtubule assembly	Nucleus	other
3.39	A_44_P130516	HLA-DRB5	major histocompatibility complex, class II, DR beta 5	Plasma Membrane	transmembrane receptor
3.386	A_44_P529645	MCEMP1	mast cell expressed membrane protein 1	Cytoplasm	other
3.374	A_43_P23108	MCM7	minichromosome maintenance complex component 7	Nucleus	enzyme
3.373	A_44_P592923	DDIAS	DNA damage induced apoptosis suppressor	Cytoplasm	other
3.364	A_44_P213149	MASTL	microtubule associated serine/threonine kinase like	Cytoplasm	kinase
3.36	A_44_P257582	CSF1R	colony stimulating factor 1 receptor	Plasma Membrane	kinase
3.359	A_42_P799208	CHST11	carbohydrate sulfotransferase 11	Cytoplasm	enzyme
3.357	A_44_P465148	Hist1h1e	histone cluster 1, H1e	Nucleus	other
3.35	A_43_P16160	CENPF	centromere protein F	Nucleus	other
3.347	A_44_P325005	PAK1	p21 (RAC1) activated kinase 1	Cytoplasm	kinase
3.34	A_44_P518500	RACGAP1	Rac GTPase activating protein 1	Cytoplasm	transporter
3.328	A_44_P333403	TROAP	trophinin associated protein	Cytoplasm	peptidase
3.326	A_44_P1008867	NETO2	neuropilin and tolloid like 2	Plasma Membrane	other
3.324	A_44_P281733	NLRP3	NLR family pyrin domain containing 3	Cytoplasm	other
3.323	A_44_P540755	Olfr315	olfactory receptor 315	Plasma Membrane	G-protein coupled receptor
3.314	A_44_P520058	UHRF1	ubiquitin like with PHD and ring finger domains 1	Nucleus	transcription regulator
3.306	A_44_P655718	FAM72A	family with sequence similarity 72 member A	Cytoplasm	other
3.288	A_44_P838888	BRIP1	BRCA1 interacting protein C-terminal helicase 1	Nucleus	enzyme
3.274	A_44_P807649	SPRED3	sprouty related EVH1 domain containing 3	Extracellular Space	cytokine
3.251	A_44_P215302	UBE2T	ubiquitin conjugating enzyme E2 T	Nucleus	enzyme
3.243	A_44_P548126	SOCS3	suppressor of cytokine signaling 3	Cytoplasm	phosphatase
3.238	A_43_P17459	NIF3L1	NGG1 interacting factor 3 like 1	Cytoplasm	other
3.229	A_44_P234129	DLGAP5	DLG associated protein 5	Nucleus	phosphatase
3.228	A_42_P527141	FOXM1	forkhead box M1	Nucleus	transcription regulator
3.226	A_44_P1023801	KIF23	kinesin family member 23	Cytoplasm	other
3.221	A_44_P380332	Cyfip2	cytoplasmic FMR1 interacting protein 2	Cytoplasm	other
3.221	A_43_P12878	ST14	suppression of tumorigenicity 14	Plasma Membrane	peptidase
3.215	A_44_P309266	PBK	PDZ binding kinase	Cytoplasm	kinase
3.214	A_44_P229122	SPAG5	sperm associated antigen 5	Nucleus	peptidase
3.209	A_42_P757258	KIF20B	kinesin family member 20B	Nucleus	enzyme
3.205	A_42_P522899	TGFB1	transforming growth factor beta 1	Extracellular Space	growth factor
3.201	A_44_P288333	RGD1565560	similar to ribosomal protein S11	Other	other
3.194	A_44_P480285	KIF2C	kinesin family member 2C	Nucleus	other
3.188	A_44_P506273	NEIL3	nei like DNA glycosylase 3	Nucleus	enzyme
3.183	A_44_P179811	TENM3	teneurin transmembrane protein 3	Plasma Membrane	other
3.182	A_44_P1030098	CDC45	cell division cycle 45	Nucleus	other
3.173	A_44_P866659	ADAM8	ADAM metallopeptidase domain 8	Plasma Membrane	peptidase
3.172	A_44_P386359	NINJ1	ninjurin 1	Plasma Membrane	other
3.17	A_44_P839432	GLIS3	GLIS family zinc finger 3	Nucleus	transcription regulator
3.17	A_44_P511128	NUSAP1	nucleolar and spindle associated protein 1	Nucleus	other
3.169	A_43_P12529	STXBP2	syntaxin binding protein 2	Plasma Membrane	transporter
3.153	A_44_P475444	RGD1564614	similar to complement factor H-related protein	Cytoplasm	other
3.143	A_44_P669786	Fam78b	family with sequence similarity 78, member B	Other	other
3.131	A_44_P898436	LRRC17	leucine rich repeat containing 17	Extracellular Space	other
3.13	A_44_P126085	MAP4K1	mitogen-activated protein kinase kinase kinase kinase 1	Cytoplasm	kinase
3.13	A_44_P126027	PFKFB4	6-phosphofructo-2-kinase/fructose-2,6-biphosphatase 4	Cytoplasm	kinase
3.127	A_44_P140669	ABI3	ABI family member 3	Plasma Membrane	other
3.125	A_42_P799494	HTATIP2	HIV-1 Tat interactive protein 2	Nucleus	transcription regulator
3.122	A_44_P438013	LAG3	lymphocyte activating 3	Plasma Membrane	transmembrane receptor
3.12	A_44_P304387	HAAO	3-hydroxyanthranilate 3,4-dioxygenase	Cytoplasm	enzyme
3.113	A_44_P605002	SLC45A4	solute carrier family 45 member 4	Other	transporter
3.1	A_43_P12413	CYBA	cytochrome b-245 alpha chain	Cytoplasm	enzyme
3.096	A_44_P386792	KIF26B	kinesin family member 26B	Other	other
3.09	A_42_P739860	DUSP5	dual specificity phosphatase 5	Nucleus	phosphatase
3.086	A_44_P410348	NLRC4	NLR family CARD domain containing 4	Cytoplasm	other
3.081	A_44_P267041	LAT	linker for activation of T-cells	Plasma Membrane	other
3.069	A_43_P12508	PTGER2	prostaglandin E receptor 2	Plasma Membrane	G-protein coupled receptor
3.067	A_43_P18802	PASK	PAS domain containing serine/threonine kinase	Cytoplasm	kinase
3.062	A_43_P12404	Evl	Enah/Vasp-like	Plasma Membrane	other
3.06	A_43_P13117	LCP2	lymphocyte cytosolic protein 2	Cytoplasm	other
3.05	A_44_P303393	DNAJC9	DnaJ heat shock protein family (Hsp40) member C9	Nucleus	other
3.035	A_44_P759995	Tnfrsf22/Tnfrsf23	tumor necrosis factor receptor superfamily, member 22	Plasma Membrane	transmembrane receptor
3.025	A_44_P475181	SLA	Src like adaptor	Plasma Membrane	other
3.021	A_44_P838436	MAPK11	mitogen-activated protein kinase 11	Cytoplasm	kinase
3.018	A_44_P431150	POLE	DNA polymerase epsilon, catalytic subunit	Nucleus	enzyme
3.015	A_44_P556528	EMILIN1	elastin microfibril interfacer 1	Extracellular Space	other
3.008	A_44_P466376	SKA3	spindle and kinetochore associated complex subunit 3	Nucleus	other
3.003	A_44_P238927	KIF18A	kinesin family member 18A	Cytoplasm	enzyme
3.002	A_42_P801679	CTSE	cathepsin E	Cytoplasm	peptidase
2.996	A_44_P238978	CDT1	chromatin licensing and DNA replication factor 1	Nucleus	other
2.992	A_44_P297428	NCAPG	non-SMC condensin I complex subunit G	Nucleus	other
2.992	A_44_P406805	RFC3	replication factor C subunit 3	Nucleus	enzyme
2.99	A_44_P400158	AURKA	aurora kinase A	Nucleus	kinase
2.99	A_42_P678430	CARD9	caspase recruitment domain family member 9	Cytoplasm	other
2.982	A_44_P468141	PLAUR	plasminogen activator, urokinase receptor	Plasma Membrane	transmembrane receptor
2.98	A_44_P904810	NCKAP1L	NCK associated protein 1 like	Plasma Membrane	other
2.979	A_44_P309008	KIF11	kinesin family member 11	Nucleus	other
2.979	A_44_P443751	PDPN	podoplanin	Plasma Membrane	other
2.976	A_44_P292568	OR2D2	olfactory receptor family 2 subfamily D member 2	Plasma Membrane	G-protein coupled receptor
2.969	A_44_P484393	LOC100359583/Ptma	prothymosin alpha	Cytoplasm	other
2.962	A_44_P295680	CNN2	calponin 2	Cytoplasm	other
2.954	A_43_P17424	CHAF1B	chromatin assembly factor 1 subunit B	Nucleus	other
2.95	A_44_P368017	PCDH17	protocadherin 17	Plasma Membrane	other
2.947	A_44_P335232	OCIAD2	OCIA domain containing 2	Cytoplasm	other
2.944	A_43_P13417	FZD2	frizzled class receptor 2	Plasma Membrane	G-protein coupled receptor
2.94	A_43_P22562	Pira2	paired-Ig-like receptor A2	Other	other
2.939	A_44_P196146	APLNR	apelin receptor	Plasma Membrane	G-protein coupled receptor
2.935	A_43_P11879	HTR2B	5-hydroxytryptamine receptor 2B	Plasma Membrane	G-protein coupled receptor
2.932	A_44_P654498	C6orf141	chromosome 6 open reading frame 141	Other	other
2.929	A_44_P493603	TMEM255A	transmembrane protein 255A	Extracellular Space	other
2.924	A_44_P424481	RCC2	regulator of chromosome condensation 2	Nucleus	other
2.92	A_44_P262517	LOC689412	similar to CG4025-PA	Other	other
2.915	A_42_P615374	C1QTNF5	C1q and TNF related 5	Plasma Membrane	transmembrane receptor
2.915	A_44_P469584	CD14	CD14 molecule	Plasma Membrane	transmembrane receptor
2.911	A_44_P435782	CIITA	class II major histocompatibility complex transactivator	Nucleus	transcription regulator
2.908	A_44_P497467	Dock4	dedicator of cytokinesis 4	Extracellular Space	other
2.907	A_44_P435955	PILRA	paired immunoglobin like type 2 receptor alpha	Plasma Membrane	other
2.885	A_44_P265058	GMNN	geminin, DNA replication inhibitor	Nucleus	transcription regulator
2.884	A_43_P17903	C9orf50	chromosome 9 open reading frame 50	Other	other
2.884	A_44_P956502	PIK3CD	phosphatidylinositol-4,5-bisphosphate 3-kinase catalytic subunit delta	Cytoplasm	kinase
2.881	A_42_P794130	CDC20	cell division cycle 20	Nucleus	other
2.87	A_44_P831755	CCER1	coiled-coil glutamate rich protein 1	Other	other
2.862	A_43_P12172	LGMN	legumain	Cytoplasm	peptidase
2.86	A_44_P296924	RDH10	retinol dehydrogenase 10	Nucleus	enzyme
2.859	A_44_P424135	MS4A3	membrane spanning 4-domains A3	Plasma Membrane	other
2.852	A_43_P15524	CCND3	cyclin D3	Nucleus	kinase
2.848	A_44_P415269	RHBDF2	rhomboid 5 homolog 2	Cytoplasm	other
2.847	A_42_P787410	CACNA1B	calcium voltage-gated channel subunit alpha1 B	Plasma Membrane	ion channel
2.843	A_44_P384086	KCNC3	potassium voltage-gated channel subfamily C member 3	Plasma Membrane	ion channel
2.842	A_44_P199096	RARRES1	retinoic acid receptor responder 1	Plasma Membrane	other
2.838	A_42_P667829	CLCNKB	chloride voltage-gated channel Kb	Plasma Membrane	ion channel
2.837	A_44_P1040685	IER5L	immediate early response 5 like	Other	other
2.823	A_44_P1041312	FES	FES proto-oncogene, tyrosine kinase	Cytoplasm	kinase
2.819	A_44_P445300	GATA6	GATA binding protein 6	Nucleus	transcription regulator
2.818	A_44_P107653	DIAPH3	diaphanous related formin 3	Cytoplasm	enzyme
2.818	A_43_P16771	GOLM1	golgi membrane protein 1	Cytoplasm	other
2.815	A_43_P12589	EPHA3	EPH receptor A3	Plasma Membrane	kinase
2.814	A_44_P156949	RTKN2	rhotekin 2	Plasma Membrane	other
2.81	A_43_P11621	CD44	CD44 molecule (Indian blood group)	Plasma Membrane	other
2.804	A_44_P103020	DBNDD2	dysbindin domain containing 2	Cytoplasm	other
2.804	A_43_P14764	NRXN1	neurexin 1	Plasma Membrane	transporter
2.794	A_44_P114851	TMEM8A	transmembrane protein 8A	Plasma Membrane	other
2.792	A_44_P363736	FHL3	four and a half LIM domains 3	Plasma Membrane	other
2.79	A_44_P304220	EMB	embigin	Plasma Membrane	transporter
2.79	A_44_P290539	MYCN	MYCN proto-oncogene, bHLH transcription factor	Nucleus	transcription regulator
2.785	A_44_P884566	NKAIN1	sodium/potassium transporting ATPase interacting 1	Plasma Membrane	other
2.779	A_44_P532237	FANCA	Fanconi anemia complementation group A	Nucleus	other
2.778	A_44_P1027493	LIX1L	limb and CNS expressed 1 like	Other	other
2.773	A_44_P337300	IL4R	interleukin 4 receptor	Plasma Membrane	transmembrane receptor
2.765	A_44_P452176	CHI3L1	chitinase 3 like 1	Extracellular Space	enzyme
2.765	A_44_P622560	GALNT6	polypeptide N-acetylgalactosaminyltransferase 6	Cytoplasm	enzyme
2.765	A_44_P340345	RPL10L	ribosomal protein L10 like	Nucleus	other
2.765	A_44_P248133	TAGLN2	transgelin 2	Cytoplasm	other
2.758	A_44_P470884	PRC1	protein regulator of cytokinesis 1	Nucleus	other
2.757	A_44_P265911	CNR2	cannabinoid receptor 2	Plasma Membrane	G-protein coupled receptor
2.752	A_44_P264659	DPYSL3	dihydropyrimidinase like 3	Cytoplasm	enzyme
2.749	A_43_P18895	SORCS2	sortilin related VPS10 domain containing receptor 2	Plasma Membrane	transporter
2.748	A_43_P17028	FBLIM1	filamin binding LIM protein 1	Plasma Membrane	other
2.748	A_44_P319064	PRMT8	protein arginine methyltransferase 8	Nucleus	enzyme
2.742	A_44_P883477	NCAPD2	non-SMC condensin I complex subunit D2	Nucleus	other
2.741	A_44_P536780	KCNG2	potassium voltage-gated channel modifier subfamily G member 2	Plasma Membrane	ion channel
2.74	A_44_P335716	SGO1	shugoshin 1	Nucleus	other
2.739	A_42_P572521	C5AR1	complement C5a receptor 1	Plasma Membrane	G-protein coupled receptor
2.738	A_44_P394228	AMDHD2	amidohydrolase domain containing 2	Nucleus	enzyme
2.733	A_44_P381917	SPHK1	sphingosine kinase 1	Cytoplasm	kinase
2.723	A_44_P373012	ARHGEF39	Rho guanine nucleotide exchange factor 39	Plasma Membrane	other
2.723	A_44_P261755	IFI30	IFI30, lysosomal thiol reductase	Cytoplasm	enzyme
2.72	A_44_P549494	CD74	CD74 molecule	Plasma Membrane	transmembrane receptor
2.715	A_42_P592157	PBX2	PBX homeobox 2	Nucleus	other
2.714	A_44_P132081	IBSP	integrin binding sialoprotein	Extracellular Space	other
2.714	A_44_P342047	RGS10	regulator of G protein signaling 10	Cytoplasm	other
2.713	A_44_P206434	LMNB2	lamin B2	Nucleus	other
2.704	A_44_P109608	GSTA1	glutathione S-transferase alpha 1	Cytoplasm	enzyme
2.701	A_42_P752134	KPNA2	karyopherin subunit alpha 2	Nucleus	transporter
2.695	A_44_P426924	MIS18BP1	MIS18 binding protein 1	Nucleus	other
2.692	A_44_P925486	CD300A	CD300a molecule	Plasma Membrane	transmembrane receptor
2.687	A_44_P253196	ARID5B	AT-rich interaction domain 5B	Nucleus	transcription regulator
2.684	A_42_P745147	BRCA2	BRCA2, DNA repair associated	Nucleus	transcription regulator
2.68	A_44_P438539	CSRNP3	cysteine and serine rich nuclear protein 3	Nucleus	transcription regulator
2.679	A_43_P11116	Prss30	protease, serine 30	Plasma Membrane	peptidase
2.678	A_44_P477650	ADAP2	ArfGAP with dual PH domains 2	Cytoplasm	other
2.677	A_44_P996233	Prim1	primase (DNA) subunit 1	Other	other
2.676	A_44_P358883	ZNF831	zinc finger protein 831	Other	other
2.665	A_44_P538658	SLC7A7	solute carrier family 7 member 7	Plasma Membrane	transporter
2.665	A_43_P22203	ZFAT	zinc finger and AT-hook domain containing	Nucleus	transcription regulator
2.664	A_44_P344228	HLA-DOA	major histocompatibility complex, class II, DO alpha	Plasma Membrane	transmembrane receptor
2.663	A_44_P261720	RGD1563351	RGD1563351	Other	other
2.656	A_44_P114000	Olfr398	olfactory receptor 398	Plasma Membrane	G-protein coupled receptor
2.654	A_44_P349475	CDH2	cadherin 2	Plasma Membrane	other
2.653	A_44_P161823	4933415F23Rik	RIKEN cDNA 4933415F23 gene	Other	other
2.649	A_44_P1041539	ARHGAP22	Rho GTPase activating protein 22	Cytoplasm	other
2.645	A_42_P800988	PTAFR	platelet activating factor receptor	Plasma Membrane	G-protein coupled receptor
2.644	A_43_P14852	TENM4	teneurin transmembrane protein 4	Plasma Membrane	other
2.64	A_44_P508945	HEYL	hes related family bHLH transcription factor with YRPW motif-like	Nucleus	transcription regulator
2.639	A_42_P560996	ITGA9	integrin subunit alpha 9	Plasma Membrane	other
2.634	A_42_P608780	GDF15	growth differentiation factor 15	Extracellular Space	growth factor
2.633	A_44_P210668	PDILT	protein disulfide isomerase like, testis expressed	Extracellular Space	enzyme
2.628	A_44_P477620	PLA2G4A	phospholipase A2 group IVA	Cytoplasm	enzyme
2.626	A_44_P384273	KCNK12	potassium two pore domain channel subfamily K member 12	Plasma Membrane	ion channel
2.621	A_42_P685287	FXYD5	FXYD domain containing ion transport regulator 5	Plasma Membrane	ion channel
2.621	A_44_P123887	SMC4	structural maintenance of chromosomes 4	Nucleus	transporter
2.618	A_42_P505241	QPRT	quinolinate phosphoribosyltransferase	Cytoplasm	enzyme
2.618	A_42_P640700	TMEM176A	transmembrane protein 176A	Other	other
2.615	A_44_P178519	ADAMTS7	ADAM metallopeptidase with thrombospondin type 1 motif 7	Extracellular Space	peptidase
2.612	A_44_P561643	GJB3	gap junction protein beta 3	Plasma Membrane	transporter
2.611	A_44_P716145	CXADR	coxsackie virus and adenovirus receptor	Plasma Membrane	transmembrane receptor
2.609	A_43_P11676	TFF3	trefoil factor 3	Extracellular Space	other
2.606	A_44_P525324	ARHGAP11A	Rho GTPase activating protein 11A	Cytoplasm	other
2.602	A_44_P273509	TIMP1	TIMP metallopeptidase inhibitor 1	Extracellular Space	cytokine
2.599	A_44_P114788	ADAMTS8	ADAM metallopeptidase with thrombospondin type 1 motif 8	Extracellular Space	peptidase
2.596	A_44_P1025102	PLSCR1	phospholipid scramblase 1	Plasma Membrane	enzyme
2.595	A_44_P988451	H2AFX	H2A histone family member X	Nucleus	transcription regulator
2.595	A_42_P524707	PRIM2	primase (DNA) subunit 2	Nucleus	enzyme
2.589	A_42_P516379	SYNPO	synaptopodin	Cytoplasm	other
2.583	A_44_P130333	MMP11	matrix metallopeptidase 11	Extracellular Space	peptidase
2.581	A_43_P13685	AHNAK2	AHNAK nucleoprotein 2	Cytoplasm	other
2.578	A_44_P321032	RGD1560281	similar to cell surface receptor FDFACT	Other	other
2.577	A_44_P871423	P2RY12	purinergic receptor P2Y12	Plasma Membrane	G-protein coupled receptor
2.576	A_44_P263159	MID1	midline 1	Nucleus	other
2.574	A_44_P400494	KRT18	keratin 18	Cytoplasm	other
2.572	A_44_P289039	Brms1/LOC100911841	breast cancer metastasis-suppressor 1	Nucleus	other
2.571	A_44_P485388	CHD7	chromodomain helicase DNA binding protein 7	Nucleus	enzyme
2.571	A_44_P180795	SPDL1	spindle apparatus coiled-coil protein 1	Nucleus	other
2.569	A_44_P297525	PMF1/PMF1-BGLAP	polyamine modulated factor 1	Nucleus	transcription regulator
2.566	A_44_P448924	Marcks	myristoylated alanine rich protein kinase C substrate	Cytoplasm	other
2.559	A_44_P920712	DOCK8	dedicator of cytokinesis 8	Cytoplasm	other
2.559	A_44_P309643	TRPS1	transcriptional repressor GATA binding 1	Nucleus	transcription regulator
2.557	A_44_P149999	C15orf39	chromosome 15 open reading frame 39	Cytoplasm	other
2.556	A_43_P23182	CENPN	centromere protein N	Nucleus	other
2.556	A_42_P556829	WIF1	WNT inhibitory factor 1	Extracellular Space	other
2.555	A_44_P404836	CP	ceruloplasmin	Extracellular Space	enzyme
2.546	A_42_P810736	TIMELESS	timeless circadian clock	Nucleus	other
2.541	A_44_P779178	RBM44	RNA binding motif protein 44	Other	other
2.541	A_43_P12850	TNFSF4	TNF superfamily member 4	Extracellular Space	cytokine
2.534	A_44_P279479	CAPN6	calpain 6	Cytoplasm	peptidase
2.533	A_44_P100443	UNG	uracil DNA glycosylase	Nucleus	enzyme
2.53	A_44_P473159	CENPI	centromere protein I	Nucleus	other
2.529	A_44_P962936	CDCA4	cell division cycle associated 4	Nucleus	other
2.527	A_44_P463504	MCAM	melanoma cell adhesion molecule	Plasma Membrane	other
2.511	A_44_P107012	BTBD16	BTB domain containing 16	Other	other
2.506	A_44_P513360	Cdkn3	cyclin-dependent kinase inhibitor 3	Cytoplasm	phosphatase
2.505	A_44_P898168	SLAMF7	SLAM family member 7	Plasma Membrane	other
2.504	A_43_P23023	PPP1R18	protein phosphatase 1 regulatory subunit 18	Other	other
2.502	A_44_P148161	RRM1	ribonucleotide reductase catalytic subunit M1	Nucleus	enzyme
2.494	A_44_P157222	TGIF1	TGFB induced factor homeobox 1	Nucleus	transcription regulator
2.491	A_44_P186185	MYLPF	myosin light chain, phosphorylatable, fast skeletal muscle	Cytoplasm	other
2.483	A_44_P506659	CELSR1	cadherin EGF LAG seven-pass G-type receptor 1	Plasma Membrane	G-protein coupled receptor
2.483	A_42_P635228	DEPDC1B	DEP domain containing 1B	Cytoplasm	other
2.481	A_44_P283921	TMEM26	transmembrane protein 26	Other	other
2.477	A_44_P485122	CEP55	centrosomal protein 55	Cytoplasm	other
2.476	A_44_P322828	DKK3	dickkopf WNT signaling pathway inhibitor 3	Extracellular Space	cytokine
2.473	A_43_P20319	DBF4	DBF4 zinc finger	Nucleus	kinase
2.473	A_44_P428535	OR9I1	olfactory receptor family 9 subfamily I member 1	Plasma Membrane	G-protein coupled receptor
2.471	A_44_P351898	MAD2L1	mitotic arrest deficient 2 like 1	Nucleus	other
2.468	A_44_P487492	SSBP4	single stranded DNA binding protein 4	Nucleus	transcription regulator
2.467	A_43_P13109	CYP26A1	cytochrome P450 family 26 subfamily A member 1	Cytoplasm	enzyme
2.464	A_44_P161550	ATP8B4	ATPase phospholipid transporting 8B4 (putative)	Plasma Membrane	transporter
2.463	A_44_P538695	EPHB2	EPH receptor B2	Plasma Membrane	kinase
2.462	A_44_P438822	SPATS2	spermatogenesis associated serine rich 2	Cytoplasm	other
2.457	A_44_P107634	HAUS4	HAUS augmin like complex subunit 4	Cytoplasm	other
2.451	A_44_P484909	P2RX4	purinergic receptor P2X 4	Plasma Membrane	ion channel
2.445	A_44_P823094	LRRK1	leucine rich repeat kinase 1	Cytoplasm	kinase
2.442	A_43_P20544	EPHB3	EPH receptor B3	Plasma Membrane	kinase
2.437	A_44_P199447	ELK3	ELK3, ETS transcription factor	Nucleus	transcription regulator
2.435	A_44_P881475	PLIN2	perilipin 2	Plasma Membrane	other
2.434	A_44_P990937	SMARCA4	SWI/SNF related, matrix associated, actin dependent regulator of chromatin, subfamily a, member 4	Nucleus	transcription regulator
2.432	A_42_P805300	GPX1	glutathione peroxidase 1	Cytoplasm	enzyme
2.431	A_44_P548203	RBM3	RNA binding motif (RNP1, RRM) protein 3	Cytoplasm	other
2.425	A_44_P428507	NFKBIE	NFKB inhibitor epsilon	Nucleus	transcription regulator
2.423	A_44_P102918	SHCBP1	SHC binding and spindle associated 1	Other	other
2.421	A_44_P976153	PTPRJ	protein tyrosine phosphatase, receptor type J	Plasma Membrane	phosphatase
2.414	A_44_P190568	CD83	CD83 molecule	Plasma Membrane	transmembrane receptor
2.409	A_44_P258773	FADD	Fas associated via death domain	Cytoplasm	other
2.402	A_44_P465931	CLIC1	chloride intracellular channel 1	Nucleus	ion channel
2.399	A_44_P823241	MEGF10	multiple EGF like domains 10	Plasma Membrane	transmembrane receptor
2.399	A_43_P16533	RNASET2	ribonuclease T2	Cytoplasm	enzyme
2.398	A_44_P532473	TRAIP	TRAF interacting protein	Cytoplasm	enzyme
2.397	A_44_P543619	TMTC4	transmembrane and tetratricopeptide repeat containing 4	Other	other
2.396	A_44_P455145	PLXNB2	plexin B2	Plasma Membrane	transmembrane receptor
2.392	A_44_P332429	C1S	complement C1s	Extracellular Space	peptidase
2.392	A_44_P468193	MXD3	MAX dimerization protein 3	Nucleus	transcription regulator
2.388	A_43_P12626	MSLN	mesothelin	Extracellular Space	other
2.387	A_44_P545945	FRMD8	FERM domain containing 8	Other	other
2.384	A_44_P526975	CCHCR1	coiled-coil alpha-helical rod protein 1	Cytoplasm	other
2.382	A_44_P380300	TONSL	tonsoku like, DNA repair protein	Cytoplasm	transcription regulator
2.375	A_42_P567527	TRAF4	TNF receptor associated factor 4	Cytoplasm	other
2.374	A_44_P428487	GUSB	glucuronidase beta	Cytoplasm	enzyme
2.372	A_44_P1022458	TUBB6	tubulin beta 6 class V	Cytoplasm	other
2.37	A_44_P288756	RGD1565117	similar to 40S ribosomal protein S26	Other	other
2.368	A_42_P772136	FAM60A	family with sequence similarity 60 member A	Extracellular Space	other
2.368	A_44_P1006261	NME4	NME/NM23 nucleoside diphosphate kinase 4	Cytoplasm	kinase
2.366	A_44_P478066	INCENP	inner centromere protein	Nucleus	other
2.366	A_44_P309146	KLHDC8A	kelch domain containing 8A	Other	other
2.361	A_44_P188995	TMEM88	transmembrane protein 88	Plasma Membrane	other
2.36	A_42_P614692	OPLAH	5-oxoprolinase (ATP-hydrolysing)	Cytoplasm	enzyme
2.356	A_44_P435059	Hmgb3	high mobility group box 3	Nucleus	other
2.356	A_44_P479216	HS6ST1	heparan sulfate 6-O-sulfotransferase 1	Plasma Membrane	enzyme
2.355	A_44_P362749	ADGRE1	adhesion G protein-coupled receptor E1	Plasma Membrane	G-protein coupled receptor
2.351	A_44_P653165	Myo15b	myosin XVB	Other	other
2.348	A_44_P1020967	NSD2	nuclear receptor binding SET domain protein 2	Nucleus	enzyme
2.346	A_44_P487418	CABP2	calcium binding protein 2	Other	other
2.346	A_43_P14144	UCK2	uridine-cytidine kinase 2	Cytoplasm	kinase
2.341	A_44_P426608	WDHD1	WD repeat and HMG-box DNA binding protein 1	Nucleus	other
2.339	A_43_P20530	STEAP2	STEAP2 metalloreductase	Plasma Membrane	transporter
2.338	A_42_P788740	FOLR2	folate receptor beta	Plasma Membrane	transporter
2.338	A_44_P1018447	MICALL2	MICAL like 2	Cytoplasm	other
2.333	A_42_P586141	PLCD1	phospholipase C delta 1	Cytoplasm	enzyme
2.332	A_44_P264915	B4GALNT4	beta-1,4-N-acetyl-galactosaminyltransferase 4	Extracellular Space	enzyme
2.331	A_44_P149476	LRCH4	leucine rich repeats and calponin homology domain containing 4	Cytoplasm	transcription regulator
2.329	A_42_P641234	SNRPA	small nuclear ribonucleoprotein polypeptide A	Nucleus	other
2.327	A_42_P659682	NAV2	neuron navigator 2	Nucleus	other
2.323	A_44_P1019324	EIF4A1	eukaryotic translation initiation factor 4A1	Cytoplasm	translation regulator
2.318	A_44_P483238	HOXC5	homeobox C5	Nucleus	transcription regulator
2.314	A_44_P501277	NECTIN1	nectin cell adhesion molecule 1	Plasma Membrane	other
2.314	A_43_P11721	SELP	selectin P	Plasma Membrane	transmembrane receptor
2.313	A_43_P12926	CYP27B1	cytochrome P450 family 27 subfamily B member 1	Cytoplasm	enzyme
2.31	A_44_P777483	LBH	limb bud and heart development	Nucleus	transcription regulator
2.308	A_44_P533786	AURKB	aurora kinase B	Nucleus	kinase
2.308	A_44_P501898	CHTF18	chromosome transmission fidelity factor 18	Nucleus	other
2.308	A_44_P433259	SIPA1	signal-induced proliferation-associated 1	Cytoplasm	other
2.302	A_42_P465601	MYH10	myosin heavy chain 10	Cytoplasm	enzyme
2.294	A_44_P100886	CEP295	centrosomal protein 295	Cytoplasm	other
2.288	A_44_P787936	STAT3	signal transducer and activator of transcription 3	Nucleus	transcription regulator
2.281	A_42_P598934	Lrrfip1	LRR binding FLII interacting protein 1	Other	other
2.28	A_44_P295673	DUSP6	dual specificity phosphatase 6	Cytoplasm	phosphatase
2.279	A_43_P20902	DONSON	downstream neighbor of SON	Extracellular Space	other
2.279	A_44_P870562	TMEM144	transmembrane protein 144	Other	other
2.276	A_44_P895970	PMP22	peripheral myelin protein 22	Plasma Membrane	other
2.275	A_44_P443349	1700009N14Rik	RIKEN cDNA 1700009N14 gene	Other	transporter
2.273	A_44_P363647	EZH2	enhancer of zeste 2 polycomb repressive complex 2 subunit	Nucleus	transcription regulator
2.27	A_44_P151574	Olr1401	olfactory receptor 1401	Other	other
2.268	A_44_P940553	BEND6	BEN domain containing 6	Nucleus	transcription regulator
2.266	A_43_P11580	ABCC2	ATP binding cassette subfamily C member 2	Plasma Membrane	transporter
2.264	A_44_P764517	SLC4A7	solute carrier family 4 member 7	Plasma Membrane	transporter
2.263	A_44_P530813	CASP3	caspase 3	Cytoplasm	peptidase
2.262	A_43_P15307	MDK	midkine (neurite growth-promoting factor 2)	Extracellular Space	growth factor
2.262	A_44_P562251	NCAPG2	non-SMC condensin II complex subunit G2	Nucleus	other
2.259	A_44_P454372	CHD4	chromodomain helicase DNA binding protein 4	Nucleus	enzyme
2.255	A_42_P763077	AQP2	aquaporin 2	Plasma Membrane	transporter
2.253	A_43_P17762	IL4I1	interleukin 4 induced 1	Cytoplasm	enzyme
2.253	A_44_P409539	PLOD2	procollagen-lysine,2-oxoglutarate 5-dioxygenase 2	Cytoplasm	enzyme
2.251	A_44_P550203	UGGT1	UDP-glucose glycoprotein glucosyltransferase 1	Cytoplasm	enzyme
2.25	A_43_P15701	RAB13	RAB13, member RAS oncogene family	Plasma Membrane	enzyme
2.246	A_44_P918267	MCPH1	microcephalin 1	Nucleus	other
2.244	A_44_P555399	FIGNL1	fidgetin like 1	Nucleus	enzyme
2.241	A_44_P378742	FLRT3	fibronectin leucine rich transmembrane protein 3	Plasma Membrane	other
2.238	A_44_P1004886	FAM198B	family with sequence similarity 198 member B	Cytoplasm	other
2.234	A_44_P677285	Abcg3l2	ATP-binding cassette, subfamily G (WHITE), member 3-like 2	Other	other
2.232	A_44_P1004757	SERPINB10	serpin family B member 10	Cytoplasm	other
2.23	A_44_P744814	Hnrnpa3	heterogeneous nuclear ribonucleoprotein A3	Nucleus	transporter
2.227	A_44_P728469	PTER	phosphotriesterase related	Cytoplasm	enzyme
2.225	A_44_P156462	REN	renin	Extracellular Space	peptidase
2.221	A_44_P943756	CCDC82	coiled-coil domain containing 82	Other	other
2.21	A_42_P545721	Snrpe	small nuclear ribonucleoprotein E	Nucleus	other
2.208	A_44_P344346	ARPC1B	actin related protein 2/3 complex subunit 1B	Cytoplasm	other
2.208	A_44_P369399	RAB38	RAB38, member RAS oncogene family	Cytoplasm	enzyme
2.207	A_44_P251706	SLC1A1	solute carrier family 1 member 1	Plasma Membrane	transporter
2.202	A_43_P21957	CD7	CD7 molecule	Plasma Membrane	other
2.202	A_44_P388777	CDK4	cyclin dependent kinase 4	Nucleus	kinase
2.202	A_44_P607121	LHFPL2	lipoma HMGIC fusion partner-like 2	Other	enzyme
2.201	A_43_P12355	ADGRL1	adhesion G protein-coupled receptor L1	Plasma Membrane	G-protein coupled receptor
2.198	A_44_P1019036	POC1A	POC1 centriolar protein A	Cytoplasm	peptidase
2.197	A_42_P679148	PCDHAC2	protocadherin alpha subfamily C, 2	Plasma Membrane	other
2.196	A_44_P438815	CMTM7	CKLF like MARVEL transmembrane domain containing 7	Extracellular Space	cytokine
2.196	A_44_P275029	MVP	major vault protein	Nucleus	other
2.195	A_42_P728794	SRPX2	sushi repeat containing protein, X-linked 2	Cytoplasm	other
2.193	A_44_P304009	FAM111A	family with sequence similarity 111 member A	Nucleus	other
2.187	A_44_P457362	COL16A1	collagen type XVI alpha 1 chain	Extracellular Space	other
2.181	A_44_P202940	LOC100909630/RT1-DMb	RT1 class II, locus DMb	Cytoplasm	other
2.177	A_44_P294650	BRCA1	BRCA1, DNA repair associated	Nucleus	transcription regulator
2.177	A_44_P261883	BZW2	basic leucine zipper and W2 domains 2	Cytoplasm	translation regulator
2.175	A_44_P196456	GNB2	G protein subunit beta 2	Plasma Membrane	enzyme
2.175	A_44_P402641	UGT1A3	UDP glucuronosyltransferase family 1 member A3	Cytoplasm	enzyme
2.173	A_44_P126938	Csap1	common salivary protein 1	Extracellular Space	other
2.173	A_42_P783292	H2AFY	H2A histone family member Y	Nucleus	other
2.172	A_43_P15268	RPS15	ribosomal protein S15	Cytoplasm	other
2.17	A_42_P649672	SV2A	synaptic vesicle glycoprotein 2A	Cytoplasm	transporter
2.169	A_44_P433349	CDK5RAP2	CDK5 regulatory subunit associated protein 2	Cytoplasm	other
2.167	A_44_P405793	NPAS2	neuronal PAS domain protein 2	Nucleus	transcription regulator
2.167	A_44_P189406	SPINT1	serine peptidase inhibitor, Kunitz type 1	Extracellular Space	other
2.16	A_44_P346537	Olfr482	olfactory receptor 482	Plasma Membrane	G-protein coupled receptor
2.151	A_44_P558157	EFHC1	EF-hand domain containing 1	Cytoplasm	other
2.15	A_43_P18256	C16orf59	chromosome 16 open reading frame 59	Other	other
2.149	A_43_P22402	FBXO5	F-box protein 5	Nucleus	enzyme
2.148	A_44_P337335	CTRC	chymotrypsin C	Extracellular Space	peptidase
2.147	A_44_P168184	Rasl2-9	RAS-like, family 2, locus 9	Nucleus	transporter
2.146	A_44_P880146	BID	BH3 interacting domain death agonist	Cytoplasm	other
2.144	A_44_P1028858	GRN	granulin precursor	Extracellular Space	growth factor
2.14	A_44_P222521	TMEM59L	transmembrane protein 59 like	Cytoplasm	other
2.139	A_44_P349002	E2F1	E2F transcription factor 1	Nucleus	transcription regulator
2.139	A_44_P361000	GRXCR1	glutaredoxin and cysteine rich domain containing 1	Extracellular Space	other
2.139	A_44_P338970	PLD1	phospholipase D1	Cytoplasm	enzyme
2.138	A_44_P217604	MSH2	mutS homolog 2	Nucleus	enzyme
2.137	A_44_P240953	FURIN	furin, paired basic amino acid cleaving enzyme	Cytoplasm	peptidase
2.135	A_44_P358028	NT5C	5', 3'-nucleotidase, cytosolic	Cytoplasm	phosphatase
2.134	A_42_P708060	GPC1	glypican 1	Plasma Membrane	transmembrane receptor
2.132	A_44_P416633	AGRN	agrin	Plasma Membrane	other
2.132	A_44_P623645	Tnik	TRAF2 and NCK interacting kinase	Cytoplasm	kinase
2.131	A_43_P13111	SKAP2	src kinase associated phosphoprotein 2	Cytoplasm	other
2.13	A_43_P10367	CORO2B	coronin 2B	Other	other
2.13	A_44_P272847	TUBE1	tubulin epsilon 1	Cytoplasm	other
2.129	A_44_P1002336	MDFIC	MyoD family inhibitor domain containing	Nucleus	other
2.126	A_44_P301608	UCP2	uncoupling protein 2	Cytoplasm	transporter
2.124	A_44_P184484	ORC1	origin recognition complex subunit 1	Nucleus	other
2.124	A_44_P334494	SH3PXD2A	SH3 and PX domains 2A	Cytoplasm	other
2.122	A_44_P513530	FAM83D	family with sequence similarity 83 member D	Cytoplasm	other
2.122	A_44_P225286	MGAT4A	mannosyl (alpha-1,3-)-glycoprotein beta-1,4-N-acetylglucosaminyltransferase, isozyme A	Cytoplasm	enzyme
2.119	A_42_P661600	Reg3a	regenerating islet-derived 3 alpha	Extracellular Space	other
2.118	A_44_P500457	ALCAM	activated leukocyte cell adhesion molecule	Plasma Membrane	other
2.113	A_44_P229376	SDAD1	SDA1 domain containing 1	Nucleus	other
2.11	A_44_P731007	SPECC1	sperm antigen with calponin homology and coiled-coil domains 1	Nucleus	other
2.104	A_42_P741027	JUN	Jun proto-oncogene, AP-1 transcription factor subunit	Nucleus	transcription regulator
2.103	A_42_P479348	HHIPL1	HHIP like 1	Other	other
2.103	A_42_P833106	RAD54L2	RAD54-like 2 (S. cerevisiae)	Nucleus	transcription regulator
2.102	A_44_P273783	ALDH1A3	aldehyde dehydrogenase 1 family member A3	Cytoplasm	enzyme
2.102	A_44_P994385	CDHR5	cadherin related family member 5	Plasma Membrane	other
2.096	A_44_P370229	FAM20C	FAM20C, golgi associated secretory pathway kinase	Extracellular Space	enzyme
2.095	A_44_P178108	Anlnl1	anillin, actin binding protein-like 1	Other	other
2.095	A_44_P463822	HOMER3	homer scaffolding protein 3	Plasma Membrane	other
2.091	A_44_P329038	GRIN2B	glutamate ionotropic receptor NMDA type subunit 2B	Plasma Membrane	ion channel
2.089	A_44_P745881	ZNF827	zinc finger protein 827	Other	other
2.086	A_42_P829863	GALK1	galactokinase 1	Cytoplasm	kinase
2.084	A_44_P680735	AP1S1	adaptor related protein complex 1 sigma 1 subunit	Cytoplasm	transporter
2.084	A_44_P203195	MADD	MAP kinase activating death domain	Cytoplasm	other
2.084	A_42_P564712	Taok2	TAO kinase 2	Cytoplasm	kinase
2.079	A_44_P112428	CHAF1A	chromatin assembly factor 1 subunit A	Nucleus	other
2.078	A_44_P196824	SERPINB9	serpin family B member 9	Cytoplasm	other
2.076	A_42_P816645	GNB4	G protein subunit beta 4	Plasma Membrane	enzyme
2.076	A_44_P330675	UBTD1	ubiquitin domain containing 1	Other	other
2.074	A_44_P177726	GFAP	glial fibrillary acidic protein	Cytoplasm	other
2.073	A_42_P687443	RAMP3	receptor activity modifying protein 3	Plasma Membrane	transporter
2.071	A_44_P363156	HNRNPD	heterogeneous nuclear ribonucleoprotein D	Nucleus	transcription regulator
2.071	A_44_P188544	Snrpg	small nuclear ribonucleoprotein polypeptide G	Nucleus	other
2.07	A_44_P540944	PLEKHA5	pleckstrin homology domain containing A5	Cytoplasm	other
2.063	A_43_P18270	EGFLAM	EGF like, fibronectin type III and laminin G domains	Extracellular Space	other
2.063	A_44_P1047158	TNIP2	TNFAIP3 interacting protein 2	Cytoplasm	other
2.061	A_44_P427814	Igh-6	immunoglobulin heavy chain 6	Other	other
2.055	A_44_P886495	SPRED1	sprouty related EVH1 domain containing 1	Plasma Membrane	other
2.055	A_44_P251081	TTYH2	tweety family member 2	Other	ion channel
2.05	A_44_P365240	PTPN2	protein tyrosine phosphatase, non-receptor type 2	Cytoplasm	phosphatase
2.049	A_44_P1059903	LZTS1	leucine zipper tumor suppressor 1	Nucleus	transcription regulator
2.049	A_44_P351209	PHLDA1	pleckstrin homology like domain family A member 1	Cytoplasm	other
2.049	A_43_P13363	TMEM37	transmembrane protein 37	Plasma Membrane	ion channel
2.048	A_44_P645452	LOC102552770	uncharacterized LOC102552770	Other	other
2.047	A_44_P166495	RANGAP1	Ran GTPase activating protein 1	Nucleus	other
2.043	A_44_P220256	PRTFDC1	phosphoribosyl transferase domain containing 1	Cytoplasm	enzyme
2.041	A_44_P623115	SLC43A2	solute carrier family 43 member 2	Plasma Membrane	transporter
2.038	A_44_P517650	ADAM17	ADAM metallopeptidase domain 17	Plasma Membrane	peptidase
2.038	A_44_P250281	HIP1	huntingtin interacting protein 1	Cytoplasm	other
2.036	A_44_P597380	LOC100910286	uncharacterized LOC100910286	Other	other
2.029	A_44_P168986	RGD1562415	similar to 40S ribosomal protein S26	Other	other
2.028	A_42_P547856	PRKCB	protein kinase C beta	Cytoplasm	kinase
2.025	A_44_P153979	ZEB1	zinc finger E-box binding homeobox 1	Nucleus	transcription regulator
2.024	A_44_P306993	LDLRAD4	low density lipoprotein receptor class A domain containing 4	Cytoplasm	other
2.023	A_44_P132533	RFC4	replication factor C subunit 4	Nucleus	other
2.022	A_44_P139869	TMEM176B	transmembrane protein 176B	Other	other
2.021	A_44_P201379	LDB1	LIM domain binding 1	Nucleus	transcription regulator
2.019	A_42_P618372	Nradd	neurotrophin receptor associated death domain	Extracellular Space	cytokine
2.015	A_42_P636761	GZMM	granzyme M	Cytoplasm	peptidase
2.012	A_44_P1021361	TLR3	toll like receptor 3	Plasma Membrane	transmembrane receptor
2.01	A_44_P351490	CD82	CD82 molecule	Plasma Membrane	other
2.01	A_44_P242756	PCNA	proliferating cell nuclear antigen	Nucleus	enzyme
2.009	A_44_P367486	LIG1	DNA ligase 1	Nucleus	enzyme
2.008	A_44_P458570	FUT4	fucosyltransferase 4	Cytoplasm	enzyme
2.007	A_44_P345081	CENPM	centromere protein M	Cytoplasm	other
2.007	A_44_P470430	FAP	fibroblast activation protein alpha	Cytoplasm	peptidase
2.005	A_44_P200507	KHDRBS1	KH RNA binding domain containing, signal transduction associated 1	Nucleus	transcription regulator
2.005	A_44_P200116	PDE10A	phosphodiesterase 10A	Cytoplasm	enzyme
2.003	A_44_P265366	ESPL1	extra spindle pole bodies like 1, separase	Nucleus	peptidase
2.001	A_42_P473467	CD276	CD276 molecule	Plasma Membrane	other
2	A_44_P1004150	VRK1	vaccinia related kinase 1	Nucleus	kinase
-2	A_44_P434216	RDH11	retinol dehydrogenase 11 (all-trans/9-cis/11-cis)	Cytoplasm	enzyme
-2	A_42_P777285	RELL1	RELT like 1	Plasma Membrane	other
-2.006	A_44_P886671	C3orf20	chromosome 3 open reading frame 20	Cytoplasm	other
-2.01	A_43_P17012	GLOD4	glyoxalase domain containing 4	Cytoplasm	enzyme
-2.016	A_42_P737912	FAM180A	family with sequence similarity 180 member A	Other	other
-2.02	A_44_P902742	FAM117B	family with sequence similarity 117 member B	Other	other
-2.025	A_44_P491796	SPP1	secreted phosphoprotein 1	Extracellular Space	cytokine
-2.027	A_44_P469188	APPBP2	amyloid beta precursor protein binding protein 2	Cytoplasm	other
-2.029	A_44_P668293	CPEB3	cytoplasmic polyadenylation element binding protein 3	Cytoplasm	translation regulator
-2.033	A_44_P418944	ENTPD5	ectonucleoside triphosphate diphosphohydrolase 5	Cytoplasm	enzyme
-2.033	A_44_P197041	YPEL5	yippee like 5	Nucleus	other
-2.038	A_44_P319256	KDELR3	KDEL endoplasmic reticulum protein retention receptor 3	Cytoplasm	transporter
-2.039	A_44_P1013248	DQX1	DEAQ-box RNA dependent ATPase 1	Other	enzyme
-2.042	A_44_P1029820	MFN2	mitofusin 2	Cytoplasm	enzyme
-2.05	A_42_P566250	DDR2	discoidin domain receptor tyrosine kinase 2	Plasma Membrane	kinase
-2.057	A_43_P15261	NR3C2	nuclear receptor subfamily 3 group C member 2	Nucleus	ligand-dependent nuclear receptor
-2.058	A_43_P18920	ERCC8	ERCC excision repair 8, CSA ubiquitin ligase complex subunit	Nucleus	transcription regulator
-2.066	A_44_P503809	OXCT1	3-oxoacid CoA-transferase 1	Cytoplasm	enzyme
-2.07	A_44_P485399	CSGALNACT2	chondroitin sulfate N-acetylgalactosaminyltransferase 2	Cytoplasm	enzyme
-2.073	A_42_P521814	EXOC6	exocyst complex component 6	Plasma Membrane	transporter
-2.076	A_44_P1047638	NDFIP2	Nedd4 family interacting protein 2	Cytoplasm	other
-2.077	A_44_P391360	ZHX1	zinc fingers and homeoboxes 1	Nucleus	transcription regulator
-2.08	A_44_P144857	ENPEP	glutamyl aminopeptidase	Plasma Membrane	peptidase
-2.082	A_44_P192288	SPATA33	spermatogenesis associated 33	Other	other
-2.084	A_43_P17382	CARMIL1	capping protein regulator and myosin 1 linker 1	Cytoplasm	enzyme
-2.086	A_44_P899064	RAB2A	RAB2A, member RAS oncogene family	Cytoplasm	enzyme
-2.088	A_44_P884459	DNAJC27	DnaJ heat shock protein family (Hsp40) member C27	Cytoplasm	enzyme
-2.09	A_44_P825566	TUBB4A	tubulin beta 4A class IVa	Cytoplasm	other
-2.092	A_44_P292010	NDRG2	NDRG family member 2	Cytoplasm	other
-2.097	A_44_P998015	CDC42EP3	CDC42 effector protein 3	Cytoplasm	other
-2.098	A_44_P998500	DRC3	dynein regulatory complex subunit 3	Cytoplasm	other
-2.098	A_44_P328717	MTM1	myotubularin 1	Cytoplasm	phosphatase
-2.1	A_44_P575034	MFSD14A	major facilitator superfamily domain containing 14A	Other	transporter
-2.1	A_44_P381483	PEX19	peroxisomal biogenesis factor 19	Cytoplasm	other
-2.101	A_44_P434462	PEMT	phosphatidylethanolamine N-methyltransferase	Cytoplasm	enzyme
-2.108	A_44_P100023	WRB	tryptophan rich basic protein	Extracellular Space	other
-2.116	A_44_P100451	KDSR	3-ketodihydrosphingosine reductase	Plasma Membrane	enzyme
-2.117	A_44_P197535	SENP2	SUMO1/sentrin/SMT3 specific peptidase 2	Nucleus	peptidase
-2.119	A_44_P1004781	SGCB	sarcoglycan beta	Plasma Membrane	other
-2.122	A_44_P809228	LOC102555762	uncharacterized LOC102555762	Other	other
-2.125	A_44_P266454	RNF181	ring finger protein 181	Cytoplasm	enzyme
-2.13	A_44_P156690	LYVE1	lymphatic vessel endothelial hyaluronan receptor 1	Plasma Membrane	transmembrane receptor
-2.131	A_43_P19525	ARHGAP12	Rho GTPase activating protein 12	Cytoplasm	other
-2.136	A_42_P614175	GAL	galanin and GMAP prepropeptide	Extracellular Space	other
-2.138	A_44_P464942	ZBTB20	zinc finger and BTB domain containing 20	Nucleus	transcription regulator
-2.147	A_43_P16895	CCSER2	coiled-coil serine rich protein 2	Other	other
-2.149	A_44_P130811	ARSK	arylsulfatase family member K	Extracellular Space	enzyme
-2.154	A_44_P306507	HIGD1A	HIG1 hypoxia inducible domain family member 1A	Cytoplasm	other
-2.157	A_44_P517896	HSD17B12	hydroxysteroid 17-beta dehydrogenase 12	Cytoplasm	enzyme
-2.159	A_44_P510222	Rnf122	ring finger protein 122	Other	other
-2.159	A_44_P975554	ST3GAL3	ST3 beta-galactoside alpha-2,3-sialyltransferase 3	Cytoplasm	enzyme
-2.16	A_44_P596424	ADAMTSL1	ADAMTS like 1	Extracellular Space	other
-2.161	A_44_P561626	UBE2Q2	ubiquitin conjugating enzyme E2 Q2	Cytoplasm	enzyme
-2.167	A_43_P15424	RAPGEF3	Rap guanine nucleotide exchange factor 3	Nucleus	other
-2.169	A_44_P897247	RAB11A	RAB11A, member RAS oncogene family	Cytoplasm	enzyme
-2.173	A_43_P18918	ACBD5	acyl-CoA binding domain containing 5	Nucleus	other
-2.174	A_43_P13381	POMC	proopiomelanocortin	Extracellular Space	other
-2.186	A_44_P632544	TPD52	tumor protein D52	Cytoplasm	other
-2.19	A_43_P11871	PADI3	peptidyl arginine deiminase 3	Cytoplasm	enzyme
-2.191	A_44_P1052046	Abi3bp	ABI gene family, member 3 (NESH) binding protein	Extracellular Space	other
-2.195	A_44_P794608	CCDC6	coiled-coil domain containing 6	Cytoplasm	other
-2.199	A_44_P325133	ADAMTSL2	ADAMTS like 2	Extracellular Space	other
-2.199	A_44_P230813	RHOT1	ras homolog family member T1	Cytoplasm	enzyme
-2.205	A_42_P553444	PCSK5	proprotein convertase subtilisin/kexin type 5	Extracellular Space	peptidase
-2.208	A_42_P764985	NAP1L3	nucleosome assembly protein 1 like 3	Nucleus	other
-2.211	A_44_P378799	IGFBP6	insulin like growth factor binding protein 6	Extracellular Space	other
-2.215	A_44_P118137	DDHD1	DDHD domain containing 1	Extracellular Space	enzyme
-2.218	A_44_P203797	Nr1h5	nuclear receptor subfamily 1, group H, member 5	Other	other
-2.218	A_42_P509766	PPARA	peroxisome proliferator activated receptor alpha	Nucleus	ligand-dependent nuclear receptor
-2.221	A_44_P409493	PDGFD	platelet derived growth factor D	Extracellular Space	growth factor
-2.226	A_44_P976703	LIFR	LIF receptor alpha	Plasma Membrane	transmembrane receptor
-2.229	A_44_P730882	BRWD1	bromodomain and WD repeat domain containing 1	Nucleus	transcription regulator
-2.229	A_44_P274397	CERS2	ceramide synthase 2	Nucleus	transcription regulator
-2.229	A_44_P123785	LYRM1	LYR motif containing 1	Cytoplasm	other
-2.244	A_44_P535913	MRM3	mitochondrial rRNA methyltransferase 3	Cytoplasm	enzyme
-2.249	A_43_P14099	YIPF6	Yip1 domain family member 6	Cytoplasm	other
-2.25	A_44_P203793	MLLT11	myeloid/lymphoid or mixed-lineage leukemia; translocated to, 11	Cytoplasm	other
-2.25	A_44_P1002317	TBATA	thymus, brain and testes associated	Cytoplasm	other
-2.258	A_44_P461025	TET1	tet methylcytosine dioxygenase 1	Nucleus	enzyme
-2.263	A_43_P21980	GNAT2	G protein subunit alpha transducin 2	Plasma Membrane	enzyme
-2.264	A_43_P19284	BCAR3	breast cancer anti-estrogen resistance 3	Cytoplasm	other
-2.267	A_44_P761172	GID4	GID complex subunit 4 homolog	Nucleus	other
-2.271	A_44_P278408	CHRDL1	chordin like 1	Extracellular Space	other
-2.278	A_44_P259125	NKIRAS1	NFKB inhibitor interacting Ras like 1	Other	enzyme
-2.285	A_44_P499056	PAQR3	progestin and adipoQ receptor family member 3	Cytoplasm	other
-2.287	A_43_P19450	PRKCA	protein kinase C alpha	Cytoplasm	kinase
-2.288	A_44_P989546	MAP3K13	mitogen-activated protein kinase kinase kinase 13	Cytoplasm	kinase
-2.289	A_44_P201601	GLCCI1	glucocorticoid induced 1	Cytoplasm	other
-2.29	A_44_P517591	EEF2K	eukaryotic elongation factor 2 kinase	Cytoplasm	kinase
-2.29	A_44_P764174	FCMR	Fc fragment of IgM receptor	Plasma Membrane	other
-2.291	A_44_P361177	PACSIN3	protein kinase C and casein kinase substrate in neurons 3	Cytoplasm	other
-2.292	A_44_P144232	FGL2	fibrinogen like 2	Extracellular Space	peptidase
-2.295	A_44_P157690	SNRPN	small nuclear ribonucleoprotein polypeptide N	Nucleus	other
-2.301	A_44_P302697	ARHGAP31	Rho GTPase activating protein 31	Cytoplasm	other
-2.303	A_44_P487157	RAB6A	RAB6A, member RAS oncogene family	Cytoplasm	enzyme
-2.304	A_44_P155956	DNAJA4	DnaJ heat shock protein family (Hsp40) member A4	Nucleus	other
-2.307	A_44_P436195	C6orf52	chromosome 6 open reading frame 52	Other	other
-2.31	A_42_P702691	FIG4	FIG4 phosphoinositide 5-phosphatase	Cytoplasm	enzyme
-2.311	A_44_P217063	ARL8B	ADP ribosylation factor like GTPase 8B	Plasma Membrane	enzyme
-2.315	A_44_P173244	TCTA	T-cell leukemia translocation altered	Other	other
-2.316	A_44_P331164	CCDC47	coiled-coil domain containing 47	Extracellular Space	other
-2.32	A_43_P17162	SNX13	sorting nexin 13	Cytoplasm	transporter
-2.321	A_42_P824178	Slc25a1	solute carrier family 25 (mitochondrial carrier, citrate transporter), member 1	Cytoplasm	transporter
-2.322	A_44_P187056	ITGA6	integrin subunit alpha 6	Plasma Membrane	transmembrane receptor
-2.325	A_44_P543643	IQCJ-SCHIP1	IQCJ-SCHIP1 readthrough	Cytoplasm	other
-2.325	A_44_P621013	OLFML1	olfactomedin like 1	Extracellular Space	other
-2.332	A_44_P104804	SARAF	store-operated calcium entry associated regulatory factor	Cytoplasm	other
-2.333	A_44_P401170	TMEM50B	transmembrane protein 50B	Plasma Membrane	other
-2.343	A_44_P976287	CDKL2	cyclin dependent kinase like 2	Nucleus	kinase
-2.344	A_44_P380575	SLC7A5	solute carrier family 7 member 5	Plasma Membrane	transporter
-2.355	A_44_P260624	PPCDC	phosphopantothenoylcysteine decarboxylase	Cytoplasm	enzyme
-2.358	A_43_P16139	Ralgps2	Ral GEF with PH domain and SH3 binding motif 2	Other	other
-2.359	A_43_P12247	ALDH1L1	aldehyde dehydrogenase 1 family member L1	Cytoplasm	enzyme
-2.362	A_44_P175349	CRISPLD2	cysteine rich secretory protein LCCL domain containing 2	Cytoplasm	other
-2.363	A_44_P412170	P4HA1	prolyl 4-hydroxylase subunit alpha 1	Cytoplasm	enzyme
-2.373	A_44_P410027	NGLY1	N-glycanase 1	Cytoplasm	enzyme
-2.374	A_42_P816427	WISP1	WNT1 inducible signaling pathway protein 1	Extracellular Space	other
-2.378	A_44_P973511	LRP11	LDL receptor related protein 11	Other	other
-2.38	A_44_P514431	LOC100912084	cAMP-dependent protein kinase catalytic subunit PRKX-like	Other	other
-2.38	A_44_P313815	TESK2	testis-specific kinase 2	Nucleus	kinase
-2.391	A_44_P331276	FHIT	fragile histidine triad	Cytoplasm	enzyme
-2.401	A_44_P264292	MAOA	monoamine oxidase A	Cytoplasm	enzyme
-2.409	A_44_P995374	Cystm1	cysteine-rich transmembrane module containing 1	Cytoplasm	other
-2.415	A_44_P697841	COX11	COX11, cytochrome c oxidase copper chaperone	Cytoplasm	enzyme
-2.415	A_44_P455501	SLC25A23	solute carrier family 25 member 23	Cytoplasm	transporter
-2.418	A_44_P531758	CRYAB	crystallin alpha B	Nucleus	other
-2.419	A_44_P859235	DCUN1D3	defective in cullin neddylation 1 domain containing 3	Cytoplasm	other
-2.423	A_44_P529005	C20orf194	chromosome 20 open reading frame 194	Nucleus	other
-2.434	A_44_P278975	SLC39A8	solute carrier family 39 member 8	Extracellular Space	transporter
-2.436	A_44_P605240	Pln	phospholamban	Cytoplasm	other
-2.442	A_43_P11817	GHR	growth hormone receptor	Plasma Membrane	transmembrane receptor
-2.447	A_44_P286245	CRBN	cereblon	Cytoplasm	enzyme
-2.454	A_44_P213174	PAMR1	peptidase domain containing associated with muscle regeneration 1	Extracellular Space	peptidase
-2.459	A_44_P318767	RAB30	RAB30, member RAS oncogene family	Cytoplasm	enzyme
-2.47	A_44_P544386	NACC2	NACC family member 2	Nucleus	transcription regulator
-2.475	A_44_P714860	SERF2	small EDRK-rich factor 2	Other	other
-2.478	A_42_P761436	NPW	neuropeptide W	Extracellular Space	other
-2.481	A_44_P328121	SV2B	synaptic vesicle glycoprotein 2B	Plasma Membrane	transporter
-2.482	A_42_P464378	ITIH3	inter-alpha-trypsin inhibitor heavy chain 3	Extracellular Space	other
-2.482	A_43_P10571	P4HTM	prolyl 4-hydroxylase, transmembrane	Cytoplasm	enzyme
-2.482	A_43_P14971	PXMP2	peroxisomal membrane protein 2	Cytoplasm	other
-2.487	A_44_P1018289	FAR1	fatty acyl-CoA reductase 1	Cytoplasm	enzyme
-2.491	A_43_P12780	AGPS	alkylglycerone phosphate synthase	Cytoplasm	enzyme
-2.491	A_44_P215393	FAM107A	family with sequence similarity 107 member A	Nucleus	other
-2.491	A_44_P260589	PAPLN	papilin, proteoglycan like sulfated glycoprotein	Extracellular Space	other
-2.512	A_44_P945920	ZFHX2	zinc finger homeobox 2	Nucleus	other
-2.518	A_44_P760998	FAM185A	family with sequence similarity 185 member A	Cytoplasm	other
-2.522	A_43_P22657	SATB1	SATB homeobox 1	Nucleus	transcription regulator
-2.535	A_44_P485416	LOC100910558	uncharacterized LOC100910558	Other	other
-2.545	A_43_P12996	CRYM	crystallin mu	Cytoplasm	enzyme
-2.548	A_43_P20743	ELMO1	engulfment and cell motility 1	Cytoplasm	other
-2.551	A_44_P479359	MVK	mevalonate kinase	Cytoplasm	kinase
-2.556	A_44_P577723	CDKL5	cyclin dependent kinase like 5	Nucleus	kinase
-2.563	A_44_P403532	GARNL3	GTPase activating Rap/RanGAP domain like 3	Other	other
-2.563	A_44_P496447	NTF3	neurotrophin 3	Extracellular Space	growth factor
-2.566	A_43_P13409	ZDHHC2	zinc finger DHHC-type containing 2	Nucleus	enzyme
-2.57	A_44_P187293	PEA15	phosphoprotein enriched in astrocytes 15	Cytoplasm	transporter
-2.572	A_44_P304842	TLE1	transducin like enhancer of split 1	Nucleus	transcription regulator
-2.574	A_44_P134405	SLC12A2	solute carrier family 12 member 2	Plasma Membrane	transporter
-2.58	A_44_P291157	FAM126B	family with sequence similarity 126 member B	Other	other
-2.581	A_43_P14910	DDC	dopa decarboxylase	Cytoplasm	enzyme
-2.586	A_43_P17743	PIR	pirin	Nucleus	transcription regulator
-2.594	A_44_P252976	GSTO2	glutathione S-transferase omega 2	Cytoplasm	enzyme
-2.61	A_44_P203145	CACNA1C	calcium voltage-gated channel subunit alpha1 C	Plasma Membrane	ion channel
-2.612	A_44_P315106	CFL2	cofilin 2	Extracellular Space	other
-2.62	A_42_P543633	GLRB	glycine receptor beta	Plasma Membrane	ion channel
-2.622	A_44_P197207	MRPS7	mitochondrial ribosomal protein S7	Cytoplasm	other
-2.625	A_44_P356322	Tmem80	transmembrane protein 80	Other	other
-2.628	A_44_P241156	MAMDC2	MAM domain containing 2	Extracellular Space	other
-2.634	A_42_P743682	LGALS2	galectin 2	Cytoplasm	other
-2.638	A_44_P1042234	STMN3	stathmin 3	Nucleus	other
-2.638	A_44_P789583	TMEM47	transmembrane protein 47	Plasma Membrane	other
-2.643	A_44_P492707	SFRP5	secreted frizzled related protein 5	Plasma Membrane	transmembrane receptor
-2.643	A_44_P761708	SLC27A4	solute carrier family 27 member 4	Plasma Membrane	transporter
-2.645	A_44_P197337	MERTK	MER proto-oncogene, tyrosine kinase	Plasma Membrane	kinase
-2.645	A_44_P740525	PATJ	PATJ, crumbs cell polarity complex component	Plasma Membrane	other
-2.651	A_44_P170496	SQOR	sulfide quinone oxidoreductase	Cytoplasm	enzyme
-2.652	A_42_P581836	FAM178B	family with sequence similarity 178 member B	Other	other
-2.655	A_44_P199211	PLCB1	phospholipase C beta 1	Cytoplasm	enzyme
-2.658	A_44_P768438	NRSN1	neurensin 1	Plasma Membrane	other
-2.66	A_44_P367421	SLC4A4	solute carrier family 4 member 4	Plasma Membrane	transporter
-2.673	A_44_P687542	ZNF106	zinc finger protein 106	Cytoplasm	other
-2.675	A_44_P166161	ADH7	alcohol dehydrogenase 7 (class IV), mu or sigma polypeptide	Cytoplasm	enzyme
-2.676	A_44_P442780	KCNAB1	potassium voltage-gated channel subfamily A member regulatory beta subunit 1	Plasma Membrane	ion channel
-2.679	A_42_P522857	MGST3	microsomal glutathione S-transferase 3	Cytoplasm	enzyme
-2.68	A_44_P374586	CYB5A	cytochrome b5 type A	Cytoplasm	enzyme
-2.68	A_44_P109862	IVNS1ABP	influenza virus NS1A binding protein	Nucleus	other
-2.684	A_44_P975471	RGD1560398	RGD1560398	Other	other
-2.685	A_43_P18107	FRY	FRY microtubule binding protein	Extracellular Space	other
-2.701	A_43_P12085	Dbil5	diazepam binding inhibitor-like 5	Cytoplasm	other
-2.707	A_44_P508935	HACD4	3-hydroxyacyl-CoA dehydratase 4	Cytoplasm	enzyme
-2.707	A_43_P12275	NAT8	N-acetyltransferase 8 (putative)	Nucleus	transcription regulator
-2.717	A_44_P156589	NGEF	neuronal guanine nucleotide exchange factor	Cytoplasm	other
-2.721	A_43_P13468	HSPA4L	heat shock protein family A (Hsp70) member 4 like	Cytoplasm	other
-2.729	A_44_P463659	CMTM6	CKLF like MARVEL transmembrane domain containing 6	Extracellular Space	cytokine
-2.731	A_44_P976960	PDZD3	PDZ domain containing 3	Plasma Membrane	transporter
-2.735	A_44_P410203	CCM2L	CCM2 like scaffolding protein	Other	other
-2.739	A_44_P899938	FAM124A	family with sequence similarity 124 member A	Other	other
-2.743	A_42_P538400	NTRK2	neurotrophic receptor tyrosine kinase 2	Plasma Membrane	kinase
-2.762	A_44_P247966	NELL1	neural EGFL like 1	Extracellular Space	growth factor
-2.765	A_44_P484332	HSPA12A	heat shock protein family A (Hsp70) member 12A	Cytoplasm	other
-2.768	A_42_P529780	SPDYA	speedy/RINGO cell cycle regulator family member A	Nucleus	other
-2.773	A_44_P392234	FGF7	fibroblast growth factor 7	Extracellular Space	growth factor
-2.78	A_44_P137334	TFB1M	transcription factor B1, mitochondrial	Cytoplasm	transcription regulator
-2.783	A_44_P808769	CLCN4	chloride voltage-gated channel 4	Plasma Membrane	ion channel
-2.794	A_44_P215689	LOC100912852	disks large homolog 5-like	Other	other
-2.796	A_44_P182431	SRD5A1	steroid 5 alpha-reductase 1	Cytoplasm	enzyme
-2.81	A_44_P762003	AMIGO1	adhesion molecule with Ig like domain 1	Plasma Membrane	other
-2.81	A_44_P1050200	C1QTNF12	C1q and TNF related 12	Extracellular Space	other
-2.824	A_44_P623125	SPTLC2	serine palmitoyltransferase long chain base subunit 2	Cytoplasm	enzyme
-2.826	A_44_P338109	SGCD	sarcoglycan delta	Cytoplasm	other
-2.827	A_44_P110044	MBOAT1	membrane bound O-acyltransferase domain containing 1	Cytoplasm	enzyme
-2.828	A_43_P17836	OTUD6B	OTU domain containing 6B	Other	other
-2.831	A_43_P20794	OSBPL5	oxysterol binding protein like 5	Cytoplasm	transporter
-2.848	A_44_P788634	MUM1L1	MUM1 like 1	Cytoplasm	other
-2.859	A_44_P555525	EPDR1	ependymin related 1	Nucleus	other
-2.88	A_44_P322960	ARAF	A-Raf proto-oncogene, serine/threonine kinase	Cytoplasm	kinase
-2.881	A_44_P638511	PAQR5	progestin and adipoQ receptor family member 5	Other	other
-2.886	A_44_P977988	LOC103692581	uncharacterized LOC103692581	Other	other
-2.889	A_43_P18228	SELENOI	selenoprotein I	Cytoplasm	enzyme
-2.889	A_44_P668388	WDR54	WD repeat domain 54	Other	other
-2.89	A_42_P676630	GPLD1	glycosylphosphatidylinositol specific phospholipase D1	Cytoplasm	enzyme
-2.91	A_42_P726132	TMEM62	transmembrane protein 62	Other	enzyme
-2.917	A_44_P514379	ACACA	acetyl-CoA carboxylase alpha	Cytoplasm	enzyme
-2.917	A_44_P536115	ARHGEF9	Cdc42 guanine nucleotide exchange factor 9	Cytoplasm	other
-2.921	A_44_P533193	ANKRD13A	ankyrin repeat domain 13A	Plasma Membrane	other
-2.923	A_42_P684538	SLC2A1	solute carrier family 2 member 1	Plasma Membrane	transporter
-2.923	A_44_P496255	SLCO3A1	solute carrier organic anion transporter family member 3A1	Plasma Membrane	transporter
-2.926	A_44_P373567	TMEM117	transmembrane protein 117	Cytoplasm	other
-2.93	A_44_P241781	TMCC3	transmembrane and coiled-coil domain family 3	Other	other
-2.932	A_44_P134342	PARD6B	par-6 family cell polarity regulator beta	Plasma Membrane	other
-2.95	A_44_P233963	MRAS	muscle RAS oncogene homolog	Plasma Membrane	enzyme
-2.97	A_44_P449745	ASCL3	achaete-scute family bHLH transcription factor 3	Nucleus	transcription regulator
-2.97	A_44_P288629	BEX1	brain expressed X-linked 1	Other	other
-2.975	A_44_P762095	IGIP	IgA inducing protein	Other	other
-2.983	A_44_P133060	NIPA1	non imprinted in Prader-Willi/Angelman syndrome 1	Plasma Membrane	transporter
-3	A_44_P484011	C21orf2	chromosome 21 open reading frame 2	Cytoplasm	other
-3.003	A_44_P240781	CAV1	caveolin 1	Plasma Membrane	transmembrane receptor
-3.007	A_44_P432965	FDPS	farnesyl diphosphate synthase	Cytoplasm	enzyme
-3.012	A_44_P756922	GLYCTK	glycerate kinase	Cytoplasm	kinase
-3.027	A_44_P666098	BEAN1	brain expressed associated with NEDD4 1	Other	other
-3.029	A_42_P646290	GNAZ	G protein subunit alpha z	Plasma Membrane	enzyme
-3.04	A_44_P156361	Olfr1231	olfactory receptor 1231	Plasma Membrane	G-protein coupled receptor
-3.087	A_44_P245835	C14orf37	chromosome 14 open reading frame 37	Extracellular Space	other
-3.106	A_44_P201077	ASRGL1	asparaginase like 1	Cytoplasm	enzyme
-3.107	A_43_P20288	SFMBT1	Scm-like with four mbt domains 1	Nucleus	transcription regulator
-3.11	A_44_P346832	TESC	tescalcin	Cytoplasm	other
-3.114	A_44_P734941	OGFRL1	opioid growth factor receptor like 1	Other	other
-3.115	A_43_P12855	OLFM1	olfactomedin 1	Cytoplasm	other
-3.115	A_44_P432826	RAP1GDS1	Rap1 GTPase-GDP dissociation stimulator 1	Cytoplasm	other
-3.129	A_44_P994492	DDAH1	dimethylarginine dimethylaminohydrolase 1	Cytoplasm	enzyme
-3.134	A_44_P545426	SLC16A1	solute carrier family 16 member 1	Plasma Membrane	transporter
-3.135	A_42_P809869	TST	thiosulfate sulfurtransferase	Cytoplasm	enzyme
-3.143	A_44_P463871	PRKD1	protein kinase D1	Cytoplasm	kinase
-3.147	A_44_P499171	Mtmr7	myotubularin related protein 7	Cytoplasm	other
-3.153	A_42_P489817	PPM1L	protein phosphatase, Mg2+/Mn2+ dependent 1L	Cytoplasm	phosphatase
-3.158	A_44_P592790	PANK1	pantothenate kinase 1	Cytoplasm	kinase
-3.16	A_42_P807826	SYNE1	spectrin repeat containing nuclear envelope protein 1	Nucleus	other
-3.161	A_44_P151482	IL22RA2	interleukin 22 receptor subunit alpha 2	Plasma Membrane	transmembrane receptor
-3.165	A_43_P22401	Lrrc51	leucine rich repeat containing 51	Other	other
-3.169	A_44_P234071	GPAT3	glycerol-3-phosphate acyltransferase 3	Cytoplasm	enzyme
-3.169	A_43_P13088	MSMO1	methylsterol monooxygenase 1	Cytoplasm	enzyme
-3.176	A_44_P396772	LRRN1	leucine rich repeat neuronal 1	Other	other
-3.18	A_43_P10230	SLC9A6	solute carrier family 9 member A6	Plasma Membrane	transporter
-3.182	A_44_P1051981	EVPL	envoplakin	Plasma Membrane	other
-3.184	A_42_P589812	AKAP6	A-kinase anchoring protein 6	Nucleus	other
-3.194	A_44_P214366	ACSL1	acyl-CoA synthetase long-chain family member 1	Cytoplasm	enzyme
-3.195	A_44_P477224	TTC9B	tetratricopeptide repeat domain 9B	Other	other
-3.197	A_44_P287564	EBP	emopamil binding protein (sterol isomerase)	Cytoplasm	enzyme
-3.199	A_44_P540690	SLC5A3	solute carrier family 5 member 3	Plasma Membrane	transporter
-3.2	A_43_P16493	PMP2	peripheral myelin protein 2	Cytoplasm	other
-3.202	A_44_P1036740	Tnxa-ps1	tenascin XA, pseudogene 1	Cytoplasm	other
-3.208	A_44_P548420	PMVK	phosphomevalonate kinase	Cytoplasm	kinase
-3.213	A_44_P476733	NQO1	NAD(P)H quinone dehydrogenase 1	Cytoplasm	enzyme
-3.213	A_44_P241241	THEM4	thioesterase superfamily member 4	Plasma Membrane	enzyme
-3.217	A_44_P547771	CITED1	Cbp/p300 interacting transactivator with Glu/Asp rich carboxy-terminal domain 1	Nucleus	transcription regulator
-3.225	A_43_P15451	TPSAB1/TPSB2	tryptase alpha/beta 1	Extracellular Space	peptidase
-3.238	A_42_P665879	ATF5	activating transcription factor 5	Nucleus	transcription regulator
-3.25	A_44_P624624	ESYT3	extended synaptotagmin 3	Plasma Membrane	other
-3.258	A_44_P103309	SGPP2	sphingosine-1-phosphate phosphatase 2	Cytoplasm	phosphatase
-3.266	A_43_P15021	SLC25A29	solute carrier family 25 member 29	Cytoplasm	transporter
-3.27	A_44_P868920	THRB	thyroid hormone receptor beta	Nucleus	ligand-dependent nuclear receptor
-3.273	A_44_P180012	DGAT2	diacylglycerol O-acyltransferase 2	Cytoplasm	enzyme
-3.279	A_44_P409425	BBOF1	basal body orientation factor 1	Cytoplasm	other
-3.28	A_44_P229481	PAQR6	progestin and adipoQ receptor family member 6	Plasma Membrane	other
-3.28	A_43_P11955	SYN2	synapsin II	Plasma Membrane	other
-3.282	A_43_P15613	NRTN	neurturin	Extracellular Space	growth factor
-3.288	A_44_P1009656	9530053A07Rik	RIKEN cDNA 9530053A07 gene	Other	other
-3.288	A_44_P255109	SNN	stannin	Plasma Membrane	other
-3.295	A_44_P578044	GREB1L	growth regulation by estrogen in breast cancer 1 like	Extracellular Space	other
-3.313	A_44_P623560	Rimkla	ribosomal modification protein rimK-like family member A	Cytoplasm	enzyme
-3.319	A_44_P176677	ATP1A2	ATPase Na+/K+ transporting subunit alpha 2	Plasma Membrane	transporter
-3.332	A_44_P727508	RAB11FIP4	RAB11 family interacting protein 4	Cytoplasm	other
-3.335	A_44_P472442	BNIP3	BCL2 interacting protein 3	Cytoplasm	other
-3.335	A_44_P441434	CAV2	caveolin 2	Plasma Membrane	other
-3.351	A_42_P525317	CACNB2	calcium voltage-gated channel auxiliary subunit beta 2	Plasma Membrane	ion channel
-3.357	A_44_P110429	FAM57A	family with sequence similarity 57 member A	Plasma Membrane	other
-3.37	A_44_P506538	RMDN2	regulator of microtubule dynamics 2	Cytoplasm	other
-3.383	A_43_P13836	NCOR1	nuclear receptor corepressor 1	Nucleus	transcription regulator
-3.387	A_42_P624773	CPZ	carboxypeptidase Z	Extracellular Space	peptidase
-3.388	A_44_P1046787	SBSPON	somatomedin B and thrombospondin type 1 domain containing	Extracellular Space	other
-3.4	A_44_P520349	BRDT	bromodomain testis associated	Nucleus	kinase
-3.43	A_44_P1052607	AOX1	aldehyde oxidase 1	Cytoplasm	enzyme
-3.446	A_44_P640345	GADL1	glutamate decarboxylase like 1	Cytoplasm	enzyme
-3.448	A_44_P590999	TC2N	tandem C2 domains, nuclear	Nucleus	transporter
-3.458	A_44_P960805	GCA	grancalcin	Cytoplasm	other
-3.465	A_44_P391982	MMD	monocyte to macrophage differentiation associated	Plasma Membrane	kinase
-3.466	A_44_P260375	COBLL1	cordon-bleu WH2 repeat protein like 1	Extracellular Space	other
-3.474	A_44_P181548	PIP4K2A	phosphatidylinositol-5-phosphate 4-kinase type 2 alpha	Cytoplasm	kinase
-3.487	A_44_P843693	MTURN	maturin, neural progenitor differentiation regulator homolog	Other	other
-3.489	A_43_P15464	CAPN8	calpain 8	Cytoplasm	peptidase
-3.494	A_43_P15576	Chn1	chimerin 1	Plasma Membrane	other
-3.52	A_44_P260475	HDAC11	histone deacetylase 11	Nucleus	transcription regulator
-3.529	A_44_P1000722	FILIP1	filamin A interacting protein 1	Cytoplasm	other
-3.541	A_44_P274083	AQP11	aquaporin 11	Plasma Membrane	transporter
-3.541	A_44_P291521	LOC103691479	uncharacterized LOC103691479	Other	other
-3.547	A_44_P1030714	CCDC92	coiled-coil domain containing 92	Cytoplasm	other
-3.548	A_44_P245314	CACNB3	calcium voltage-gated channel auxiliary subunit beta 3	Plasma Membrane	ion channel
-3.554	A_44_P398193	CGREF1	cell growth regulator with EF-hand domain 1	Extracellular Space	other
-3.591	A_44_P415115	TSPAN13	tetraspanin 13	Plasma Membrane	other
-3.616	A_43_P12695	NCOA2	nuclear receptor coactivator 2	Nucleus	transcription regulator
-3.623	A_44_P321510	SLC25A33	solute carrier family 25 member 33	Cytoplasm	transporter
-3.647	A_44_P198804	NRXN2	neurexin 2	Plasma Membrane	transporter
-3.662	A_44_P793922	CACNA1A	calcium voltage-gated channel subunit alpha1 A	Plasma Membrane	ion channel
-3.674	A_44_P515211	TNFSF15	TNF superfamily member 15	Extracellular Space	cytokine
-3.683	A_44_P792087	FGF1	fibroblast growth factor 1	Extracellular Space	growth factor
-3.691	A_44_P358492	FDFT1	farnesyl-diphosphate farnesyltransferase 1	Cytoplasm	enzyme
-3.695	A_44_P325189	RCAN2	regulator of calcineurin 2	Other	other
-3.698	A_44_P432452	AKR1B1	aldo-keto reductase family 1 member B	Cytoplasm	enzyme
-3.719	A_44_P406957	CYB561	cytochrome b561	Cytoplasm	enzyme
-3.725	A_44_P711487	ARG2	arginase 2	Cytoplasm	enzyme
-3.734	A_44_P544757	TMEM178B	transmembrane protein 178B	Other	other
-3.735	A_44_P613170	LOC100909913/Ndp	NDP, norrin cystine knot growth factor	Extracellular Space	cytokine
-3.748	A_44_P235978	FASN	fatty acid synthase	Cytoplasm	enzyme
-3.754	A_44_P710192	TMEM45B	transmembrane protein 45B	Extracellular Space	other
-3.758	A_43_P12779	NRN1	neuritin 1	Cytoplasm	other
-3.769	A_43_P15779	HAPLN2	hyaluronan and proteoglycan link protein 2	Extracellular Space	other
-3.781	A_42_P502271	FAM81A	family with sequence similarity 81 member A	Other	other
-3.782	A_44_P730489	STARD10	StAR related lipid transfer domain containing 10	Cytoplasm	other
-3.783	A_43_P17494	LIMCH1	LIM and calponin homology domains 1	Other	other
-3.8	A_44_P487123	SLC25A27	solute carrier family 25 member 27	Cytoplasm	transporter
-3.803	A_44_P365580	SQLE	squalene epoxidase	Cytoplasm	enzyme
-3.816	A_42_P462771	CD9	CD9 molecule	Plasma Membrane	other
-3.83	A_42_P631818	CNMD	chondromodulin	Extracellular Space	other
-3.832	A_42_P637037	CLCN3	chloride voltage-gated channel 3	Plasma Membrane	ion channel
-3.833	A_44_P105448	Col4a5	collagen type IV alpha 5 chain	Extracellular Space	other
-3.836	A_44_P215157	LIN7B	lin-7 homolog B, crumbs cell polarity complex component	Cytoplasm	other
-3.838	A_44_P443465	HEPACAM	hepatic and glial cell adhesion molecule	Plasma Membrane	other
-3.838	A_44_P135641	RAPSN	receptor associated protein of the synapse	Plasma Membrane	other
-3.842	A_44_P376043	ATP8A1	ATPase phospholipid transporting 8A1	Cytoplasm	transporter
-3.865	A_42_P641962	PCSK6	proprotein convertase subtilisin/kexin type 6	Extracellular Space	peptidase
-3.874	A_44_P595964	IQSEC1	IQ motif and Sec7 domain 1	Cytoplasm	other
-3.88	A_43_P13051	ST8SIA2	ST8 alpha-N-acetyl-neuraminide alpha-2,8-sialyltransferase 2	Cytoplasm	enzyme
-3.884	A_44_P310168	TGFA	transforming growth factor alpha	Extracellular Space	growth factor
-3.903	A_42_P453976	Ifitm6	interferon induced transmembrane protein 6	Other	other
-3.909	A_42_P569832	RAB6B	RAB6B, member RAS oncogene family	Cytoplasm	enzyme
-3.915	A_44_P1007110	SVIP	small VCP interacting protein	Cytoplasm	other
-3.92	A_43_P20053	FUT8	fucosyltransferase 8	Cytoplasm	enzyme
-3.921	A_44_P222632	DUSP15	dual specificity phosphatase 15	Cytoplasm	phosphatase
-3.922	A_44_P215108	LEPR	leptin receptor	Plasma Membrane	transmembrane receptor
-3.928	A_43_P14633	Zfp651	zinc finger protein 651	Other	other
-3.95	A_44_P821386	Aldh1a7	aldehyde dehydrogenase family 1, subfamily A7	Cytoplasm	enzyme
-3.956	A_44_P1040966	LRRC24	leucine rich repeat containing 24	Other	other
-3.97	A_44_P272148	SPIRE2	spire type actin nucleation factor 2	Cytoplasm	other
-3.987	A_44_P555261	ALDH6A1	aldehyde dehydrogenase 6 family member A1	Cytoplasm	enzyme
-4.003	A_44_P501593	ACSS2	acyl-CoA synthetase short-chain family member 2	Cytoplasm	enzyme
-4.006	A_42_P794613	MVD	mevalonate diphosphate decarboxylase	Cytoplasm	enzyme
-4.01	A_43_P10134	HECW2	HECT, C2 and WW domain containing E3 ubiquitin protein ligase 2	Extracellular Space	enzyme
-4.022	A_44_P264785	SLC38A1	solute carrier family 38 member 1	Plasma Membrane	transporter
-4.041	A_42_P543877	TLCD1	TLC domain containing 1	Other	other
-4.046	A_44_P971207	NUDT11	nudix hydrolase 11	Cytoplasm	phosphatase
-4.079	A_44_P549075	PLA2G5	phospholipase A2 group V	Extracellular Space	enzyme
-4.082	A_44_P653272	GPR155	G protein-coupled receptor 155	Plasma Membrane	G-protein coupled receptor
-4.092	A_44_P637687	KIAA1549L	KIAA1549 like	Cytoplasm	other
-4.101	A_44_P529455	GNRH1	gonadotropin releasing hormone 1	Extracellular Space	other
-4.133	A_44_P367481	P2RX6	purinergic receptor P2X 6	Plasma Membrane	ion channel
-4.135	A_42_P487567	DSP	desmoplakin	Plasma Membrane	other
-4.141	A_44_P147055	GJB1	gap junction protein beta 1	Plasma Membrane	transporter
-4.155	A_44_P186225	PPP1R16B	protein phosphatase 1 regulatory subunit 16B	Plasma Membrane	phosphatase
-4.158	A_44_P227221	SYDE2	synapse defective Rho GTPase homolog 2	Cytoplasm	other
-4.171	A_44_P283030	Scd2	stearoyl-Coenzyme A desaturase 2	Cytoplasm	enzyme
-4.177	A_44_P168285	CYP51A1	cytochrome P450 family 51 subfamily A member 1	Cytoplasm	enzyme
-4.193	A_44_P996557	PTPDC1	protein tyrosine phosphatase domain containing 1	Extracellular Space	phosphatase
-4.203	A_44_P343393	FXYD3	FXYD domain containing ion transport regulator 3	Plasma Membrane	other
-4.233	A_44_P578505	LOC100364027	hexokinase 1-like	Cytoplasm	other
-4.253	A_42_P784541	MPV17L	MPV17 mitochondrial inner membrane protein like	Cytoplasm	other
-4.262	A_44_P314087	LOC102552073/LOC681186	hypothetical protein LOC681186	Other	other
-4.298	A_44_P191822	Nat8f5	N-acetyltransferase 8 (GCN5-related) family member 5	Other	enzyme
-4.316	A_44_P511034	VEPH1	ventricular zone expressed PH domain containing 1	Nucleus	other
-4.33	A_43_P17213	ABHD1	abhydrolase domain containing 1	Other	other
-4.333	A_44_P197064	TMEM63C	transmembrane protein 63C	Other	ion channel
-4.345	A_44_P618099	ARVCF	armadillo repeat gene deleted in velocardiofacial syndrome	Plasma Membrane	other
-4.355	A_44_P547168	INSIG1	insulin induced gene 1	Cytoplasm	other
-4.37	A_44_P897781	HSD17B7	hydroxysteroid 17-beta dehydrogenase 7	Cytoplasm	enzyme
-4.372	A_44_P314110	ERMN	ermin	Extracellular Space	other
-4.376	A_44_P484474	LSMEM2	leucine rich single-pass membrane protein 2	Other	other
-4.38	A_44_P151230	LPL	lipoprotein lipase	Cytoplasm	enzyme
-4.387	A_42_P699217	SOX2	SRY-box 2	Nucleus	transcription regulator
-4.389	A_43_P12330	SLC13A3	solute carrier family 13 member 3	Plasma Membrane	transporter
-4.396	A_43_P14604	CLSTN2	calsyntenin 2	Plasma Membrane	transporter
-4.401	A_44_P385688	RAB40B	RAB40B, member RAS oncogene family	Plasma Membrane	enzyme
-4.42	A_44_P364961	RHOBTB3	Rho related BTB domain containing 3	Cytoplasm	enzyme
-4.438	A_43_P16774	ACAT2	acetyl-CoA acetyltransferase 2	Cytoplasm	enzyme
-4.439	A_44_P359121	DCLK3	doublecortin like kinase 3	Cytoplasm	kinase
-4.441	A_44_P960333	MPZL2	myelin protein zero like 2	Plasma Membrane	other
-4.457	A_44_P449938	KCNJ13	potassium voltage-gated channel subfamily J member 13	Plasma Membrane	ion channel
-4.463	A_43_P11729	HMGCR	3-hydroxy-3-methylglutaryl-CoA reductase	Cytoplasm	enzyme
-4.463	A_43_P12665	MMP24	matrix metallopeptidase 24	Plasma Membrane	peptidase
-4.489	A_44_P914022	SYCE3	synaptonemal complex central element protein 3	Nucleus	other
-4.508	A_44_P687109	ARHGEF37	Rho guanine nucleotide exchange factor 37	Other	other
-4.511	A_42_P792817	ME1	malic enzyme 1	Cytoplasm	enzyme
-4.529	A_44_P387623	GAS2	growth arrest specific 2	Cytoplasm	other
-4.531	A_42_P589190	AACS	acetoacetyl-CoA synthetase	Cytoplasm	enzyme
-4.533	A_44_P149161	PSAT1	phosphoserine aminotransferase 1	Cytoplasm	enzyme
-4.549	A_42_P544328	Cd99l2	CD99 molecule-like 2	Plasma Membrane	other
-4.569	A_44_P269930	MFSD2A	major facilitator superfamily domain containing 2A	Plasma Membrane	transporter
-4.66	A_44_P428437	MIA	melanoma inhibitory activity	Extracellular Space	other
-4.663	A_44_P202424	Rapgef5	Rap guanine nucleotide exchange factor 5	Nucleus	other
-4.688	A_44_P406099	CAVIN2	caveolae associated protein 2	Plasma Membrane	other
-4.691	A_44_P529426	ERBB4	erb-b2 receptor tyrosine kinase 4	Plasma Membrane	kinase
-4.698	A_43_P12200	SLC26A1	solute carrier family 26 member 1	Plasma Membrane	transporter
-4.702	A_44_P553507	ZPLD1	zona pellucida like domain containing 1	Other	other
-4.708	A_44_P883087	RGS13	regulator of G protein signaling 13	Nucleus	other
-4.711	A_44_P840399	LOC102553942	uncharacterized LOC102553942	Other	other
-4.726	A_43_P11752	MAOB	monoamine oxidase B	Cytoplasm	enzyme
-4.758	A_43_P19503	LOC686911	similar to Exocyst complex component 1 (Exocyst complex component Sec3)	Other	other
-4.81	A_43_P12868	SMPD3	sphingomyelin phosphodiesterase 3	Cytoplasm	enzyme
-4.824	A_44_P517858	SVOP	SV2 related protein	Cytoplasm	transporter
-4.844	A_43_P19435	EGFL6	EGF like domain multiple 6	Extracellular Space	other
-4.913	A_44_P398330	Gm4952	predicted gene 4952	Cytoplasm	other
-4.93	A_42_P602822	RET	ret proto-oncogene	Plasma Membrane	kinase
-4.992	A_44_P354244	FRRS1L	ferric chelate reductase 1 like	Cytoplasm	transporter
-4.997	A_44_P154793	IQCG	IQ motif containing G	Cytoplasm	other
-5.016	A_43_P10290	TSPAN1	tetraspanin 1	Cytoplasm	other
-5.048	A_43_P14045	SEMA4G	semaphorin 4G	Plasma Membrane	other
-5.089	A_44_P179296	COL6A5	collagen type VI alpha 5 chain	Extracellular Space	other
-5.145	A_44_P960765	CHODL	chondrolectin	Plasma Membrane	other
-5.172	A_43_P15252	COL2A1	collagen type II alpha 1 chain	Extracellular Space	other
-5.253	A_44_P241448	Arxes1/Arxes2	adipocyte-related X-chromosome expressed sequence 2	Cytoplasm	other
-5.262	A_44_P263037	PNPLA3	patatin like phospholipase domain containing 3	Cytoplasm	enzyme
-5.272	A_43_P12162	PPP2R2B	protein phosphatase 2 regulatory subunit Bbeta	Cytoplasm	phosphatase
-5.353	A_44_P309979	CHST2	carbohydrate sulfotransferase 2	Cytoplasm	enzyme
-5.356	A_44_P347250	DHCR24	24-dehydrocholesterol reductase	Cytoplasm	enzyme
-5.359	A_44_P175703	MGC114492/RGD1559726	similar to melanoma antigen family A, 6	Other	other
-5.382	A_44_P243295	LOC100912723	CD209 antigen-like protein A-like	Other	other
-5.383	A_44_P251944	IDI1	isopentenyl-diphosphate delta isomerase 1	Cytoplasm	enzyme
-5.397	A_42_P825274	HSPB2	heat shock protein family B (small) member 2	Cytoplasm	other
-5.407	A_44_P376994	LSAMP	limbic system-associated membrane protein	Plasma Membrane	other
-5.409	A_43_P12115	PROM1	prominin 1	Plasma Membrane	other
-5.431	A_42_P466362	ADCY8	adenylate cyclase 8	Plasma Membrane	enzyme
-5.444	A_44_P349209	LOC100363914 (includes others)	similar to DC-SIGN	Other	other
-5.496	A_44_P977318	TFCP2L1	transcription factor CP2 like 1	Nucleus	transcription regulator
-5.508	A_44_P556299	NSDHL	NAD(P) dependent steroid dehydrogenase-like	Cytoplasm	enzyme
-5.511	A_44_P308925	ABAT	4-aminobutyrate aminotransferase	Cytoplasm	enzyme
-5.513	A_44_P791404	Luzp2	leucine zipper protein 2	Other	other
-5.535	A_44_P118724	ARC	activity regulated cytoskeleton associated protein	Cytoplasm	other
-5.536	A_42_P578386	TSSK2	testis specific serine kinase 2	Cytoplasm	kinase
-5.551	A_44_P747182	UNC13C	unc-13 homolog C	Cytoplasm	other
-5.566	A_44_P820062	AIF1L	allograft inflammatory factor 1 like	Plasma Membrane	other
-5.569	A_44_P527024	COL11A2	collagen type XI alpha 2 chain	Extracellular Space	other
-5.576	A_44_P438750	RDH12	retinol dehydrogenase 12 (all-trans/9-cis/11-cis)	Cytoplasm	enzyme
-5.603	A_44_P680974	SC5D	sterol-C5-desaturase	Cytoplasm	enzyme
-5.611	A_44_P538165	TSPAN17	tetraspanin 17	Other	enzyme
-5.648	A_44_P276724	Slc25a48	solute carrier family 25, member 48	Cytoplasm	other
-5.665	A_44_P426529	ME3	malic enzyme 3	Cytoplasm	enzyme
-5.675	A_44_P487240	HMGCS1	3-hydroxy-3-methylglutaryl-CoA synthase 1	Cytoplasm	enzyme
-5.729	A_44_P466757	GRAMD2A	GRAM domain containing 2A	Other	other
-5.739	A_43_P16988	FA2H	fatty acid 2-hydroxylase	Cytoplasm	enzyme
-5.76	A_44_P181836	SECISBP2L	SECIS binding protein 2 like	Other	other
-5.762	A_44_P295531	9530003J23Rik	RIKEN cDNA 9530003J23 gene	Extracellular Space	other
-5.82	A_44_P424148	GLDC	glycine decarboxylase	Cytoplasm	enzyme
-5.862	A_44_P452145	CAMK2B	calcium/calmodulin dependent protein kinase II beta	Cytoplasm	kinase
-5.901	A_44_P781948	Coch	cochlin	Cytoplasm	other
-5.949	A_44_P132714	PCLO	piccolo presynaptic cytomatrix protein	Cytoplasm	transporter
-6.042	A_44_P949804	LGR6	leucine rich repeat containing G protein-coupled receptor 6	Plasma Membrane	G-protein coupled receptor
-6.096	A_44_P306162	UGT8	UDP glycosyltransferase 8	Cytoplasm	enzyme
-6.21	A_43_P15496	MS4A2	membrane spanning 4-domains A2	Plasma Membrane	transmembrane receptor
-6.219	A_43_P18922	SEMA5A	semaphorin 5A	Plasma Membrane	transmembrane receptor
-6.246	A_44_P1017996	WDR17	WD repeat domain 17	Other	other
-6.266	A_44_P400756	CSMD1	CUB and Sushi multiple domains 1	Plasma Membrane	other
-6.301	A_44_P177434	GPM6A	glycoprotein M6A	Plasma Membrane	ion channel
-6.387	A_43_P19094	ELOVL7	ELOVL fatty acid elongase 7	Cytoplasm	enzyme
-6.396	A_44_P550237	MAPT	microtubule associated protein tau	Plasma Membrane	other
-6.412	A_44_P212267	PKIA	cAMP-dependent protein kinase inhibitor alpha	Cytoplasm	other
-6.458	A_44_P390247	PRRG3	proline rich and Gla domain 3	Plasma Membrane	other
-6.475	A_42_P830311	MRAP	melanocortin 2 receptor accessory protein	Cytoplasm	other
-6.489	A_44_P118625	CALB1	calbindin 1	Cytoplasm	other
-6.528	A_44_P123543	LIN7A	lin-7 homolog A, crumbs cell polarity complex component	Plasma Membrane	other
-6.541	A_44_P290074	COL4A3BP	collagen type IV alpha 3 binding protein	Cytoplasm	kinase
-6.811	A_44_P321867	FAM213A	family with sequence similarity 213 member A	Extracellular Space	other
-6.95	A_43_P15978	FGF4	fibroblast growth factor 4	Extracellular Space	growth factor
-6.968	A_44_P870348	SLC35D3	solute carrier family 35 member D3	Cytoplasm	other
-6.97	A_44_P263777	SLC6A20	solute carrier family 6 member 20	Plasma Membrane	transporter
-7.038	A_42_P814765	TM7SF2	transmembrane 7 superfamily member 2	Cytoplasm	enzyme
-7.193	A_42_P478101	EPHX4	epoxide hydrolase 4	Other	enzyme
-7.235	A_44_P327799	Apoc3	apolipoprotein C-III	Extracellular Space	transporter
-7.238	A_44_P777795	LOC102552773	uncharacterized LOC102552773	Other	other
-7.248	A_42_P737738	SLC18A3	solute carrier family 18 member A3	Plasma Membrane	transporter
-7.328	A_44_P1071620	MMP27	matrix metallopeptidase 27	Cytoplasm	peptidase
-7.355	A_44_P1047441	LRP2	LDL receptor related protein 2	Plasma Membrane	transporter
-7.483	A_44_P407573	CNFN	cornifelin	Cytoplasm	other
-7.641	A_44_P361161	LYPD6B	LY6/PLAUR domain containing 6B	Other	other
-7.754	A_44_P374733	TRHR	thyrotropin releasing hormone receptor	Plasma Membrane	G-protein coupled receptor
-8.109	A_44_P193130	SFTPA1	surfactant protein A1	Extracellular Space	transporter
-8.194	A_44_P685554	DCDC2	doublecortin domain containing 2	Extracellular Space	other
-8.264	A_44_P608485	ROBO3	roundabout guidance receptor 3	Plasma Membrane	transmembrane receptor
-8.328	A_44_P132960	S100A3	S100 calcium binding protein A3	Other	transporter
-8.666	A_44_P184938	RLBP1	retinaldehyde binding protein 1	Cytoplasm	transporter
-8.816	A_44_P289627	GRIA2	glutamate ionotropic receptor AMPA type subunit 2	Plasma Membrane	ion channel
-9.31	A_42_P832417	VSNL1	visinin like 1	Cytoplasm	other
-9.319	A_42_P541962	C1QTNF4	C1q and TNF related 4	Extracellular Space	other
-9.747	A_44_P560021	B3GALT2	beta-1,3-galactosyltransferase 2	Cytoplasm	enzyme
-9.84	A_44_P111489	ELOVL6	ELOVL fatty acid elongase 6	Cytoplasm	enzyme
-10.243	A_44_P478172	Tdpoz2	TD and POZ domain containing 2	Other	other
-11.104	A_44_P135066	GALNT13	polypeptide N-acetylgalactosaminyltransferase 13	Cytoplasm	enzyme
-12.48	A_44_P838490	RGR	retinal G protein coupled receptor	Plasma Membrane	G-protein coupled receptor
-14.157	A_44_P550145	SCD	stearoyl-CoA desaturase	Cytoplasm	enzyme
-14.768	A_44_P1042952	Hrk	harakiri, BCL2 interacting protein (contains only BH3 domain)	Cytoplasm	other
-14.789	A_44_P157881	FMO2	flavin containing monooxygenase 2	Cytoplasm	enzyme
-15.476	A_44_P378562	FMO3	flavin containing monooxygenase 3	Cytoplasm	enzyme
-44.42	A_44_P321009	CYP1A1	cytochrome P450 family 1 subfamily A member 1	Cytoplasm	enzyme

## Sheet: 14d
Expr Fold Change	ID	Symbol	Entrez Gene Name	Location	Type(s)
285.531	A_44_P555271	MMP12	matrix metallopeptidase 12	Extracellular Space	peptidase
43.804	A_44_P160841	Calcb	calcitonin-related polypeptide, beta	Extracellular Space	other
35.322	A_44_P930826	Clec2d (includes others)	C-type lectin domain family 2, member D	Plasma Membrane	other
34.18	A_44_P112546	MRAP2	melanocortin 2 receptor accessory protein 2	Cytoplasm	other
29.916	A_42_P686234	Muc4	mucin 4	Plasma Membrane	other
29.759	A_44_P151156	Kng1/Kng2	kininogen 2	Extracellular Space	other
25.903	A_44_P107596	CTSW	cathepsin W	Cytoplasm	peptidase
25.506	A_44_P142043	OR6K6	olfactory receptor family 6 subfamily K member 6	Plasma Membrane	G-protein coupled receptor
25.463	A_44_P377266	OLR1	oxidized low density lipoprotein receptor 1	Plasma Membrane	transmembrane receptor
24.623	A_44_P333910	Mcpt4	mast cell protease 4	Other	peptidase
24.613	A_44_P640180	ZC2HC1B	zinc finger C2HC-type containing 1B	Other	other
24.399	A_44_P473510	VSIG4	V-set and immunoglobulin domain containing 4	Plasma Membrane	other
24.184	A_44_P304323	CCL5	C-C motif chemokine ligand 5	Extracellular Space	cytokine
20.906	A_44_P438272	Crisp1/Crisp3	cysteine-rich secretory protein 1	Extracellular Space	other
20.111	A_42_P818323	GFRA3	GDNF family receptor alpha 3	Plasma Membrane	transmembrane receptor
20.005	A_44_P411954	CD2	CD2 molecule	Plasma Membrane	transmembrane receptor
19.024	A_44_P448431	CD8A	CD8a molecule	Plasma Membrane	other
18.952	A_44_P1058520	SH2D1A	SH2 domain containing 1A	Cytoplasm	other
18.948	A_44_P332790	TRH	thyrotropin releasing hormone	Extracellular Space	other
18.888	A_44_P163242	EPCAM	epithelial cell adhesion molecule	Plasma Membrane	other
18.067	A_44_P325522	LMNB1	lamin B1	Nucleus	other
17.832	A_43_P13420	SPON1	spondin 1	Extracellular Space	other
17.206	A_44_P704618	FAM167A	family with sequence similarity 167 member A	Cytoplasm	other
16.485	A_44_P147062	MOXD1	monooxygenase DBH like 1	Cytoplasm	enzyme
15.991	A_43_P13203	Wfdc17/Wfdc18	WAP four-disulfide core domain 18	Extracellular Space	other
15.75	A_44_P340261	Stra6l	STRA6-like	Plasma Membrane	other
15.505	A_42_P525886	CRABP1	cellular retinoic acid binding protein 1	Cytoplasm	transporter
14.94	A_42_P799702	AARD	alanine and arginine rich domain containing protein	Other	other
14.553	A_44_P276538	LILRB4	leukocyte immunoglobulin like receptor B4	Plasma Membrane	other
14.534	A_44_P103225	CD3E	CD3e molecule	Plasma Membrane	transmembrane receptor
14.179	A_44_P405374	LOC290071	similar to T cell receptor V-alpha J-alpha	Other	other
13.968	A_42_P466283	GZMK	granzyme K	Cytoplasm	peptidase
13.032	A_43_P11590	MMP7	matrix metallopeptidase 7	Extracellular Space	peptidase
12.831	A_44_P470619	SRXN1	sulfiredoxin 1	Cytoplasm	enzyme
12.382	A_44_P114207	HK3	hexokinase 3	Cytoplasm	kinase
12.318	A_43_P13048	TNFSF11	TNF superfamily member 11	Extracellular Space	cytokine
12.203	A_44_P850143	TLX2	T-cell leukemia homeobox 2	Nucleus	transcription regulator
12.14	A_43_P11861	DIO3	iodothyronine deiodinase 3	Plasma Membrane	enzyme
12.093	A_44_P514627	ADGRL3	adhesion G protein-coupled receptor L3	Plasma Membrane	G-protein coupled receptor
12.01	A_44_P578061	MAB21L3	mab-21 like 3	Other	other
11.867	A_44_P269457	GPR83	G protein-coupled receptor 83	Plasma Membrane	G-protein coupled receptor
11.523	A_44_P497011	TRB	T-cell receptor beta locus	Plasma Membrane	transmembrane receptor
11.515	A_44_P563229	Klrb1f	killer cell lectin-like receptor subfamily B member 1F	Plasma Membrane	other
11.47	A_44_P292547	OR5AP2	olfactory receptor family 5 subfamily AP member 2	Plasma Membrane	G-protein coupled receptor
11.308	A_44_P396842	UCN2	urocortin 2	Extracellular Space	other
11.027	A_44_P485051	Siglech	sialic acid binding Ig-like lectin H	Plasma Membrane	other
10.956	A_44_P994692	ZAP70	zeta chain of T-cell receptor associated protein kinase 70	Plasma Membrane	kinase
10.793	A_42_P693316	CFI	complement factor I	Extracellular Space	peptidase
10.708	A_44_P256677	PLCXD3	phosphatidylinositol specific phospholipase C X domain containing 3	Other	other
10.699	A_43_P12276	VAX1	ventral anterior homeobox 1	Nucleus	transcription regulator
10.628	A_44_P153516	SLC18A2	solute carrier family 18 member A2	Plasma Membrane	transporter
10.478	A_44_P556989	NGFR	nerve growth factor receptor	Plasma Membrane	transmembrane receptor
10.266	A_42_P500080	NKG7	natural killer cell granule protein 7	Plasma Membrane	other
10.154	A_44_P185355	BCL11B	B-cell CLL/lymphoma 11B	Nucleus	transcription regulator
10.142	A_44_P264694	APOC4	apolipoprotein C4	Extracellular Space	transporter
10.09	A_44_P507053	LOC690020	similar to killer cell lectin-like receptor, subfamily A, member 17	Other	other
10.054	A_43_P15638	TNC	tenascin C	Extracellular Space	other
10.028	A_42_P480723	CD8B	CD8b molecule	Plasma Membrane	other
10.016	A_44_P409803	CD5	CD5 molecule	Plasma Membrane	transmembrane receptor
9.85	A_43_P11543	KLRD1	killer cell lectin like receptor D1	Plasma Membrane	transmembrane receptor
9.808	A_44_P168875	TMEM108	transmembrane protein 108	Plasma Membrane	other
9.791	A_44_P716457	LOC100911216/Pcsk1	proprotein convertase subtilisin/kexin type 1	Plasma Membrane	peptidase
9.547	A_44_P536089	Klre1	killer cell lectin-like receptor family E member 1	Plasma Membrane	transmembrane receptor
9.524	A_44_P716774	EML5	echinoderm microtubule associated protein like 5	Cytoplasm	other
9.413	A_42_P598304	KLRB1	killer cell lectin like receptor B1	Plasma Membrane	transmembrane receptor
9.328	A_44_P484730	OR8H2	olfactory receptor family 8 subfamily H member 2	Plasma Membrane	G-protein coupled receptor
9.167	A_42_P495969	Apoc1	apolipoprotein C1	Extracellular Space	other
9.075	A_44_P135094	Art2b	ADP-ribosyltransferase 2b	Plasma Membrane	enzyme
9.026	A_44_P371339	IL6	interleukin 6	Extracellular Space	cytokine
8.924	A_44_P404843	CXCR3	C-X-C motif chemokine receptor 3	Plasma Membrane	G-protein coupled receptor
8.845	A_42_P579174	CD3D	CD3d molecule	Plasma Membrane	transmembrane receptor
8.759	A_43_P11654	PNOC	prepronociceptin	Extracellular Space	other
8.669	A_44_P372254	Slpi (includes others)	secretory leukocyte peptidase inhibitor	Cytoplasm	other
8.658	A_44_P652447	CXCR6	C-X-C motif chemokine receptor 6	Plasma Membrane	G-protein coupled receptor
8.645	A_44_P260663	PARVG	parvin gamma	Cytoplasm	other
8.617	A_44_P409840	CCL17	C-C motif chemokine ligand 17	Extracellular Space	cytokine
8.483	A_44_P550938	PCDH11X	protocadherin 11 X-linked	Plasma Membrane	other
8.317	A_43_P11672	IL1RL1	interleukin 1 receptor like 1	Plasma Membrane	transmembrane receptor
8.167	A_44_P254984	PNLIP	pancreatic lipase	Extracellular Space	enzyme
8.124	A_43_P22811	CD6	CD6 molecule	Plasma Membrane	transmembrane receptor
8.078	A_44_P458855	PTPRN	protein tyrosine phosphatase, receptor type N	Plasma Membrane	phosphatase
7.985	A_44_P496327	PRF1	perforin 1	Cytoplasm	transporter
7.854	A_44_P237153	BIRC5	baculoviral IAP repeat containing 5	Cytoplasm	other
7.768	A_44_P183638	Pirb	paired Ig-like receptor B	Plasma Membrane	other
7.703	A_43_P13004	CDH17	cadherin 17	Plasma Membrane	transporter
7.587	A_43_P13246	XCL1	X-C motif chemokine ligand 1	Extracellular Space	cytokine
7.571	A_44_P543548	TRA2B	transformer 2 beta homolog	Nucleus	other
7.55	A_44_P295563	COL7A1	collagen type VII alpha 1 chain	Extracellular Space	other
7.507	A_44_P990376	GPNMB	glycoprotein nmb	Plasma Membrane	enzyme
7.503	A_44_P438117	RGS1	regulator of G protein signaling 1	Plasma Membrane	other
7.403	A_44_P314431	BICDL2	BICD family like cargo adaptor 2	Other	other
7.398	A_43_P11086	UPK1B	uroplakin 1B	Plasma Membrane	other
7.342	A_42_P663871	GZMA	granzyme A	Cytoplasm	peptidase
7.308	A_44_P290786	LRIT3	leucine rich repeat, Ig-like and transmembrane domains 3	Other	other
7.238	A_44_P309146	KLHDC8A	kelch domain containing 8A	Other	other
7.193	A_44_P154176	Zim1	zinc finger, imprinted 1	Nucleus	other
7.063	A_44_P179904	SH2D2A	SH2 domain containing 2A	Cytoplasm	other
7.023	A_42_P787160	Ptprv	protein tyrosine phosphatase, receptor type, V	Other	other
6.999	A_42_P726223	ADCYAP1R1	ADCYAP receptor type I	Plasma Membrane	G-protein coupled receptor
6.973	A_44_P462661	IL1RN	interleukin 1 receptor antagonist	Extracellular Space	cytokine
6.886	A_44_P247281	CXCL14	C-X-C motif chemokine ligand 14	Extracellular Space	cytokine
6.849	A_44_P1021106	LMO4	LIM domain only 4	Nucleus	transcription regulator
6.847	A_44_P854174	C3orf80	chromosome 3 open reading frame 80	Other	other
6.825	A_44_P327890	TFAP2C	transcription factor AP-2 gamma	Nucleus	transcription regulator
6.818	A_44_P920519	GABRB2	gamma-aminobutyric acid type A receptor beta2 subunit	Plasma Membrane	ion channel
6.732	A_44_P469527	TMEM200A	transmembrane protein 200A	Other	other
6.707	A_44_P184297	RUNX2	runt related transcription factor 2	Nucleus	transcription regulator
6.676	A_44_P481971	NRP1	neuropilin 1	Plasma Membrane	transmembrane receptor
6.665	A_44_P766913	TRPM2	transient receptor potential cation channel subfamily M member 2	Plasma Membrane	ion channel
6.663	A_44_P440302	Olfr1179	olfactory receptor 1179	Plasma Membrane	G-protein coupled receptor
6.646	A_44_P255149	Klrc2/Klrc3	killer cell lectin-like receptor subfamily C, member 2	Plasma Membrane	transmembrane receptor
6.596	A_44_P342923	FIBIN	fin bud initiation factor homolog (zebrafish)	Cytoplasm	other
6.585	A_44_P1035483	THBS2	thrombospondin 2	Extracellular Space	other
6.549	A_44_P259851	OR4X1	olfactory receptor family 4 subfamily X member 1 (gene/pseudogene)	Plasma Membrane	G-protein coupled receptor
6.518	A_43_P18698	SEPT1	septin 1	Cytoplasm	enzyme
6.399	A_44_P409820	FASLG	Fas ligand	Extracellular Space	cytokine
6.357	A_44_P224810	NLRP10	NLR family pyrin domain containing 10	Other	other
6.21	A_44_P678814	OLFML2A	olfactomedin like 2A	Extracellular Space	other
6.171	A_44_P192393	ACER1	alkaline ceramidase 1	Cytoplasm	enzyme
6.143	A_44_P150185	LTBP2	latent transforming growth factor beta binding protein 2	Extracellular Space	other
6.142	A_42_P839593	INHBA	inhibin beta A subunit	Extracellular Space	growth factor
6.087	A_44_P201276	Lilrb3	leukocyte immunoglobulin like receptor B3	Other	other
6.085	A_44_P1050595	CELA1	chymotrypsin like elastase family member 1	Extracellular Space	peptidase
5.972	A_44_P501536	ARMC4	armadillo repeat containing 4	Extracellular Space	other
5.82	A_44_P382226	SOX4	SRY-box 4	Nucleus	transcription regulator
5.806	A_44_P121517	CD180	CD180 molecule	Plasma Membrane	other
5.794	A_44_P344492	STAT4	signal transducer and activator of transcription 4	Nucleus	transcription regulator
5.75	A_44_P730837	DSG2	desmoglein 2	Plasma Membrane	other
5.749	A_44_P575152	C16orf96	chromosome 16 open reading frame 96	Other	other
5.726	A_43_P19999	Fcrls	Fc receptor-like S, scavenger receptor	Plasma Membrane	other
5.653	A_44_P480925	LOC728392	uncharacterized LOC728392	Other	other
5.64	A_44_P1004392	SIDT1	SID1 transmembrane family member 1	Other	other
5.585	A_43_P21322	HCLS1	hematopoietic cell-specific Lyn substrate 1	Nucleus	other
5.581	A_44_P265709	IL2RB	interleukin 2 receptor subunit beta	Plasma Membrane	transmembrane receptor
5.538	A_44_P359587	PGR	progesterone receptor	Nucleus	ligand-dependent nuclear receptor
5.524	A_44_P452070	OR51I1	olfactory receptor family 51 subfamily I member 1	Plasma Membrane	G-protein coupled receptor
5.515	A_44_P255817	PRAM1	PML-RARA regulated adaptor molecule 1	Other	other
5.508	A_44_P372587	CX3CR1	C-X3-C motif chemokine receptor 1	Plasma Membrane	G-protein coupled receptor
5.472	A_44_P743669	SEMA3E	semaphorin 3E	Extracellular Space	other
5.468	A_44_P431296	GPR18	G protein-coupled receptor 18	Plasma Membrane	G-protein coupled receptor
5.462	A_44_P868581	PPP1R1C	protein phosphatase 1 regulatory inhibitor subunit 1C	Cytoplasm	phosphatase
5.449	A_43_P14764	NRXN1	neurexin 1	Plasma Membrane	transporter
5.437	A_42_P809101	TCTEX1D1	Tctex1 domain containing 1	Other	other
5.426	A_44_P1047933	MAPK1	mitogen-activated protein kinase 1	Cytoplasm	kinase
5.393	A_44_P358151	Sectm1b	secreted and transmembrane 1B	Extracellular Space	cytokine
5.384	A_44_P633041	LPAR4	lysophosphatidic acid receptor 4	Plasma Membrane	transmembrane receptor
5.299	A_44_P335219	IL21R	interleukin 21 receptor	Plasma Membrane	transmembrane receptor
5.29	A_42_P791677	AREG	amphiregulin	Extracellular Space	growth factor
5.216	A_44_P433882	CRISPLD1	cysteine rich secretory protein LCCL domain containing 1	Cytoplasm	other
5.193	A_44_P501112	MMP9	matrix metallopeptidase 9	Extracellular Space	peptidase
5.168	A_44_P602702	MPEG1	macrophage expressed 1	Cytoplasm	other
5.135	A_44_P226771	MAPK8IP3	mitogen-activated protein kinase 8 interacting protein 3	Cytoplasm	other
5.114	A_44_P511304	LCK	LCK proto-oncogene, Src family tyrosine kinase	Cytoplasm	kinase
5.065	A_44_P487000	Olfr1181/Olfr1182	olfactory receptor 1181	Plasma Membrane	G-protein coupled receptor
5.029	A_42_P493301	POU3F1	POU class 3 homeobox 1	Nucleus	transcription regulator
5	A_44_P452222	ITGAL	integrin subunit alpha L	Plasma Membrane	transmembrane receptor
4.981	A_44_P163301	Olr1171/Olr1177	olfactory receptor 1177	Other	other
4.964	A_43_P14852	TENM4	teneurin transmembrane protein 4	Plasma Membrane	other
4.956	A_44_P463899	PILRB	paired immunoglobin-like type 2 receptor beta	Plasma Membrane	other
4.952	A_44_P714618	Arl4c	ADP-ribosylation factor like GTPase 4C	Cytoplasm	other
4.952	A_44_P290953	CLVS1	clavesin 1	Cytoplasm	other
4.939	A_43_P13122	Gucy2d	guanylate cyclase 2d	Other	enzyme
4.938	A_44_P468468	LBP	lipopolysaccharide binding protein	Plasma Membrane	transporter
4.932	A_44_P266817	Klra22	killer cell lectin-like receptor subfamily A, member 22	Other	other
4.914	A_44_P624451	C10orf128	chromosome 10 open reading frame 128	Other	other
4.863	A_42_P732259	FAM26F	family with sequence similarity 26 member F	Other	other
4.862	A_43_P12296	DIO2	iodothyronine deiodinase 2	Cytoplasm	enzyme
4.843	A_44_P252517	Havcr1	hepatitis A virus cellular receptor 1	Plasma Membrane	other
4.831	A_44_P175078	COL27A1	collagen type XXVII alpha 1 chain	Extracellular Space	other
4.818	A_43_P11574	ST8SIA1	ST8 alpha-N-acetyl-neuraminide alpha-2,8-sialyltransferase 1	Cytoplasm	enzyme
4.816	A_44_P367688	HLA-DRA	major histocompatibility complex, class II, DR alpha	Plasma Membrane	transmembrane receptor
4.807	A_44_P792845	RUNX3	runt related transcription factor 3	Nucleus	transcription regulator
4.788	A_44_P319064	PRMT8	protein arginine methyltransferase 8	Nucleus	enzyme
4.783	A_44_P422356	Trim80	tripartite motif-containing 80	Other	other
4.777	A_44_P248506	IFNE	interferon epsilon	Extracellular Space	cytokine
4.689	A_44_P1023538	C3	complement C3	Extracellular Space	peptidase
4.671	A_42_P768024	SPN	sialophorin	Plasma Membrane	transmembrane receptor
4.664	A_43_P15961	Clca3b	chloride channel accessory 3B	Other	ion channel
4.656	A_44_P308827	Olfr582	olfactory receptor 582	Plasma Membrane	G-protein coupled receptor
4.653	A_44_P849944	PRSS35	protease, serine 35	Extracellular Space	peptidase
4.633	A_44_P974179	LCA5L	LCA5L, lebercilin like	Extracellular Space	other
4.561	A_44_P391118	Olfr1324	olfactory receptor 1324	Plasma Membrane	G-protein coupled receptor
4.546	A_43_P16181	H2-Eb2	histocompatibility 2, class II antigen E beta2	Other	other
4.539	A_44_P550768	LOC102555173	uncharacterized LOC102555173	Other	other
4.534	A_44_P355702	IGFBP3	insulin like growth factor binding protein 3	Extracellular Space	other
4.534	A_44_P247815	Olfr199/Olfr201	olfactory receptor 201	Plasma Membrane	G-protein coupled receptor
4.528	A_44_P835847	C1QTNF3	C1q and TNF related 3	Extracellular Space	other
4.509	A_44_P410469	B430306N03Rik	RIKEN cDNA B430306N03 gene	Other	other
4.498	A_44_P311096	ABCB4	ATP binding cassette subfamily B member 4	Plasma Membrane	transporter
4.486	A_44_P128013	MRGPRX3	MAS related GPR family member X3	Plasma Membrane	G-protein coupled receptor
4.459	A_44_P421727	CARD11	caspase recruitment domain family member 11	Cytoplasm	kinase
4.449	A_44_P808277	Ptk7	protein tyrosine kinase 7	Plasma Membrane	other
4.447	A_44_P544113	ILDR1	immunoglobulin like domain containing receptor 1	Plasma Membrane	transmembrane receptor
4.442	A_44_P1027971	GPR84	G protein-coupled receptor 84	Plasma Membrane	G-protein coupled receptor
4.438	A_44_P355958	Olfr876	olfactory receptor 876	Plasma Membrane	G-protein coupled receptor
4.405	A_44_P932384	PLXNC1	plexin C1	Plasma Membrane	transmembrane receptor
4.396	A_44_P210268	Olfr281	olfactory receptor 281	Plasma Membrane	G-protein coupled receptor
4.372	A_43_P11809	UMOD	uromodulin	Extracellular Space	other
4.363	A_44_P918225	SLC8A1	solute carrier family 8 member A1	Plasma Membrane	transporter
4.326	A_44_P853326	MEX3A	mex-3 RNA binding family member A	Cytoplasm	other
4.316	A_44_P182479	KCNK4	potassium two pore domain channel subfamily K member 4	Plasma Membrane	ion channel
4.308	A_44_P259977	ARNTL2	aryl hydrocarbon receptor nuclear translocator like 2	Nucleus	transcription regulator
4.299	A_44_P964460	ITK	IL2 inducible T-cell kinase	Cytoplasm	kinase
4.257	A_44_P292934	Ms4a4c	membrane-spanning 4-domains, subfamily A, member 4C	Other	other
4.249	A_43_P11749	HCK	HCK proto-oncogene, Src family tyrosine kinase	Cytoplasm	kinase
4.245	A_44_P487418	CABP2	calcium binding protein 2	Other	other
4.224	A_43_P15803	LOC681290	uncharacterized LOC681290	Other	other
4.209	A_44_P500803	HLA-DQB1	major histocompatibility complex, class II, DQ beta 1	Plasma Membrane	other
4.192	A_44_P866810	TEAD2	TEA domain transcription factor 2	Nucleus	transcription regulator
4.164	A_44_P365351	Olr1346	olfactory receptor 1346	Plasma Membrane	G-protein coupled receptor
4.103	A_44_P427814	Igh-6	immunoglobulin heavy chain 6	Other	other
4.1	A_44_P475159	THY1	Thy-1 cell surface antigen	Plasma Membrane	other
4.069	A_44_P213100	PTPN22	protein tyrosine phosphatase, non-receptor type 22	Cytoplasm	phosphatase
4.042	A_44_P290539	MYCN	MYCN proto-oncogene, bHLH transcription factor	Nucleus	transcription regulator
4.038	A_44_P463805	CD247	CD247 molecule	Plasma Membrane	transmembrane receptor
4.003	A_44_P266892	Olfr711	olfactory receptor 711	Plasma Membrane	G-protein coupled receptor
4.002	A_44_P406636	ABCA1	ATP binding cassette subfamily A member 1	Plasma Membrane	transporter
3.995	A_44_P319979	VMP1	vacuole membrane protein 1	Plasma Membrane	other
3.987	A_44_P828142	IL7R	interleukin 7 receptor	Plasma Membrane	transmembrane receptor
3.984	A_44_P210173	TNFRSF12A	TNF receptor superfamily member 12A	Plasma Membrane	transmembrane receptor
3.971	A_44_P494754	CLSPN	claspin	Nucleus	other
3.954	A_43_P16370	OR4C45	olfactory receptor family 4 subfamily C member 45 (gene/pseudogene)	Plasma Membrane	G-protein coupled receptor
3.936	A_44_P168405	FCGR2A	Fc fragment of IgG receptor IIa	Plasma Membrane	transmembrane receptor
3.935	A_43_P10939	PCLAF	PCNA clamp associated factor	Nucleus	other
3.933	A_44_P452632	IRF8	interferon regulatory factor 8	Nucleus	transcription regulator
3.924	A_44_P114537	Celf4	CUGBP, Elav-like family member 4	Nucleus	other
3.918	A_44_P372853	Psx1 (includes others)	placenta specific homeobox 1	Other	other
3.913	A_44_P158533	Tmsbl1	thymosin beta-like protein 1	Cytoplasm	other
3.911	A_43_P12257	ESM1	endothelial cell specific molecule 1	Extracellular Space	growth factor
3.906	A_42_P679371	CORO1A	coronin 1A	Cytoplasm	other
3.871	A_42_P591344	ITGB2	integrin subunit beta 2	Plasma Membrane	transmembrane receptor
3.855	A_44_P144741	BLNK	B-cell linker	Cytoplasm	other
3.798	A_44_P483728	RPS6KA1	ribosomal protein S6 kinase A1	Cytoplasm	kinase
3.782	A_44_P1042360	Clec4a3	C-type lectin domain family 4, member a3	Other	other
3.755	A_44_P376900	GPR171	G protein-coupled receptor 171	Plasma Membrane	G-protein coupled receptor
3.75	A_43_P12403	FGR	FGR proto-oncogene, Src family tyrosine kinase	Nucleus	kinase
3.749	A_43_P10020	LYZ	lysozyme	Extracellular Space	enzyme
3.726	A_44_P130516	HLA-DRB5	major histocompatibility complex, class II, DR beta 5	Plasma Membrane	transmembrane receptor
3.719	A_44_P330783	Trg	T cell receptor gamma locus	Plasma Membrane	other
3.717	A_44_P125761	Olfr1346	olfactory receptor 1346	Plasma Membrane	G-protein coupled receptor
3.714	A_44_P363071	Olfr283	olfactory receptor 283	Plasma Membrane	G-protein coupled receptor
3.713	A_44_P698466	LRRTM2	leucine rich repeat transmembrane neuronal 2	Plasma Membrane	other
3.71	A_42_P527724	FCN1	ficolin 1	Extracellular Space	peptidase
3.694	A_42_P592157	PBX2	PBX homeobox 2	Nucleus	other
3.683	A_44_P232205	BIN2	bridging integrator 2	Plasma Membrane	other
3.681	A_44_P326031	ATP8A2	ATPase phospholipid transporting 8A2	Plasma Membrane	transporter
3.675	A_44_P1039249	DOK3	docking protein 3	Cytoplasm	other
3.668	A_42_P602511	KCNN4	potassium calcium-activated channel subfamily N member 4	Plasma Membrane	ion channel
3.665	A_43_P10690	Klra17 (includes others)	similar to immunoreceptor Ly49si3	Other	other
3.662	A_42_P801831	FBLN1	fibulin 1	Extracellular Space	other
3.651	A_44_P777359	C1orf162	chromosome 1 open reading frame 162	Other	transporter
3.632	A_44_P668582	ARHGAP25	Rho GTPase activating protein 25	Cytoplasm	other
3.615	A_44_P1004323	COL18A1	collagen type XVIII alpha 1 chain	Extracellular Space	other
3.593	A_44_P435782	CIITA	class II major histocompatibility complex transactivator	Nucleus	transcription regulator
3.593	A_44_P365611	GPR31	G protein-coupled receptor 31	Plasma Membrane	G-protein coupled receptor
3.59	A_44_P1014388	MMS22L	MMS22 like, DNA repair protein	Nucleus	other
3.583	A_44_P439493	PLA2G10	phospholipase A2 group X	Cytoplasm	enzyme
3.573	A_44_P438013	LAG3	lymphocyte activating 3	Plasma Membrane	transmembrane receptor
3.563	A_44_P461857	LOC102547986	40S ribosomal protein S2-like	Other	other
3.56	A_44_P531770	TOP2A	topoisomerase (DNA) II alpha	Nucleus	enzyme
3.553	A_44_P546123	MCM5	minichromosome maintenance complex component 5	Nucleus	enzyme
3.551	A_44_P515317	IGFBP4	insulin like growth factor binding protein 4	Extracellular Space	other
3.542	A_44_P355013	EDNRB	endothelin receptor type B	Plasma Membrane	G-protein coupled receptor
3.539	A_44_P438060	GNA15	G protein subunit alpha 15	Plasma Membrane	enzyme
3.535	A_43_P16265	Olfr1353	olfactory receptor 1353	Plasma Membrane	G-protein coupled receptor
3.532	A_44_P956203	SASH3	SAM and SH3 domain containing 3	Cytoplasm	other
3.529	A_42_P601961	SUSD3	sushi domain containing 3	Plasma Membrane	other
3.505	A_44_P365642	KLK5	kallikrein related peptidase 5	Extracellular Space	peptidase
3.498	A_44_P593830	IL12RB1	interleukin 12 receptor subunit beta 1	Plasma Membrane	transmembrane receptor
3.476	A_42_P735417	FCGR2B	Fc fragment of IgG receptor IIb	Plasma Membrane	transmembrane receptor
3.456	A_43_P12274	Lst1	leukocyte specific transcript 1	Cytoplasm	other
3.454	A_44_P286409	TTK	TTK protein kinase	Nucleus	kinase
3.451	A_44_P161233	IL18	interleukin 18	Extracellular Space	cytokine
3.443	A_44_P255216	IBSP	integrin binding sialoprotein	Extracellular Space	other
3.443	A_44_P388755	KIF15	kinesin family member 15	Nucleus	other
3.44	A_44_P669577	FREM1	FRAS1 related extracellular matrix 1	Extracellular Space	other
3.439	A_44_P1013006	STEAP1	STEAP family member 1	Plasma Membrane	transporter
3.425	A_44_P976687	CENPW	centromere protein W	Nucleus	other
3.41	A_42_P580844	CDK1	cyclin dependent kinase 1	Nucleus	kinase
3.41	A_44_P760780	MCM3	minichromosome maintenance complex component 3	Nucleus	enzyme
3.408	A_44_P126938	Csap1	common salivary protein 1	Extracellular Space	other
3.406	A_44_P255912	4930438A08Rik	RIKEN cDNA 4930438A08 gene	Other	other
3.389	A_44_P945669	DSN1	DSN1 homolog, MIS12 kinetochore complex component	Nucleus	other
3.376	A_44_P173330	SNX20	sorting nexin 20	Cytoplasm	other
3.373	A_44_P763036	IL10RA	interleukin 10 receptor subunit alpha	Plasma Membrane	transmembrane receptor
3.366	A_44_P1039616	CD300C	CD300c molecule	Plasma Membrane	transmembrane receptor
3.366	A_44_P622560	GALNT6	polypeptide N-acetylgalactosaminyltransferase 6	Cytoplasm	enzyme
3.364	A_44_P303393	DNAJC9	DnaJ heat shock protein family (Hsp40) member C9	Nucleus	other
3.354	A_42_P693821	FOSL1	FOS like 1, AP-1 transcription factor subunit	Nucleus	transcription regulator
3.351	A_44_P299933	Ncaph	non-SMC condensin I complex, subunit H	Cytoplasm	other
3.346	A_42_P676304	Ifitm1	interferon induced transmembrane protein 1	Other	other
3.34	A_44_P403058	ANKLE1	ankyrin repeat and LEM domain containing 1	Cytoplasm	enzyme
3.334	A_44_P276338	MCM6	minichromosome maintenance complex component 6	Nucleus	enzyme
3.331	A_43_P18226	MYO1F	myosin IF	Cytoplasm	other
3.33	A_44_P1038296	CD68	CD68 molecule	Plasma Membrane	other
3.325	A_44_P487764	C1QA	complement C1q A chain	Extracellular Space	peptidase
3.313	A_44_P163731	GALNTL6	polypeptide N-acetylgalactosaminyltransferase-like 6	Other	other
3.3	A_44_P228942	RUNX1	runt related transcription factor 1	Nucleus	transcription regulator
3.297	A_44_P438539	CSRNP3	cysteine and serine rich nuclear protein 3	Nucleus	transcription regulator
3.293	A_44_P653701	MYBL2	MYB proto-oncogene like 2	Nucleus	transcription regulator
3.276	A_44_P419810	LRR1	leucine rich repeat protein 1	Other	enzyme
3.269	A_44_P189496	FCGR1A	Fc fragment of IgG receptor Ia	Plasma Membrane	transmembrane receptor
3.265	A_43_P23155	MCM10	minichromosome maintenance 10 replication initiation factor	Nucleus	other
3.24	A_44_P507469	MYOF	myoferlin	Nucleus	other
3.239	A_44_P298049	NCF1	neutrophil cytosolic factor 1	Cytoplasm	enzyme
3.234	A_44_P318861	WDFY4	WDFY family member 4	Other	other
3.232	A_43_P14894	Nppb	natriuretic peptide type B	Other	other
3.222	A_44_P161899	OCIAD2	OCIA domain containing 2	Cytoplasm	other
3.221	A_44_P309179	DTL	denticleless E3 ubiquitin protein ligase homolog	Nucleus	other
3.214	A_44_P312089	NEURL3	neuralized E3 ubiquitin protein ligase 3	Other	enzyme
3.208	A_44_P288916	SLC30A10	solute carrier family 30 member 10	Other	transporter
3.2	A_44_P262556	STAP1	signal transducing adaptor family member 1	Cytoplasm	other
3.199	A_43_P12208	Basp1	brain abundant, membrane attached signal protein 1	Cytoplasm	transcription regulator
3.199	A_44_P480157	KIF4A	kinesin family member 4A	Nucleus	other
3.198	A_44_P479216	HS6ST1	heparan sulfate 6-O-sulfotransferase 1	Plasma Membrane	enzyme
3.196	A_44_P130333	MMP11	matrix metallopeptidase 11	Extracellular Space	peptidase
3.181	A_44_P1024773	DSCC1	DNA replication and sister chromatid cohesion 1	Nucleus	other
3.17	A_44_P263105	LIMD2	LIM domain containing 2	Other	other
3.165	A_44_P549494	CD74	CD74 molecule	Plasma Membrane	transmembrane receptor
3.165	A_44_P653165	Myo15b	myosin XVB	Other	other
3.135	A_44_P206292	CDCA3	cell division cycle associated 3	Cytoplasm	other
3.135	A_44_P130818	LGI3	leucine rich repeat LGI family member 3	Extracellular Space	other
3.118	A_43_P20126	CENPH	centromere protein H	Nucleus	other
3.114	A_42_P598412	APOBEC1	apolipoprotein B mRNA editing enzyme catalytic subunit 1	Cytoplasm	enzyme
3.105	A_44_P482128	PTPRZ1	protein tyrosine phosphatase, receptor type Z1	Plasma Membrane	phosphatase
3.101	A_44_P270468	SLC15A3	solute carrier family 15 member 3	Cytoplasm	transporter
3.094	A_42_P727191	CSRP2	cysteine and glycine rich protein 2	Nucleus	other
3.089	A_44_P477819	NRG1	neuregulin 1	Plasma Membrane	growth factor
3.076	A_44_P398729	SBNO2	strawberry notch homolog 2	Other	transcription regulator
3.072	A_44_P129749	Crabp2/LOC100911902	cellular retinoic acid binding protein 2	Cytoplasm	other
3.071	A_44_P548126	SOCS3	suppressor of cytokine signaling 3	Cytoplasm	phosphatase
3.067	A_42_P749184	PENK	proenkephalin	Extracellular Space	other
3.066	A_44_P329038	GRIN2B	glutamate ionotropic receptor NMDA type subunit 2B	Plasma Membrane	ion channel
3.066	A_42_P473314	LOC100909593/RT1-DMa	RT1 class II, locus DMa	Cytoplasm	other
3.066	A_43_P22638	PAPPA	pappalysin 1	Extracellular Space	peptidase
3.062	A_44_P997586	PLK4	polo like kinase 4	Cytoplasm	kinase
3.057	A_44_P606174	BCL2L14	BCL2 like 14	Cytoplasm	other
3.052	A_44_P157314	CLEC4D	C-type lectin domain family 4 member D	Plasma Membrane	other
3.046	A_43_P15106	E2F8	E2F transcription factor 8	Nucleus	transcription regulator
3.037	A_44_P384506	PRAG1	PEAK1 related kinase activating pseudokinase 1	Nucleus	kinase
3.033	A_44_P311136	VAV1	vav guanine nucleotide exchange factor 1	Nucleus	transcription regulator
3.029	A_44_P299565	Mcpt1	mast cell protease 1	Other	peptidase
3.023	A_43_P19763	TLR2	toll like receptor 2	Plasma Membrane	transmembrane receptor
3.021	A_44_P761837	KIF14	kinesin family member 14	Cytoplasm	enzyme
3.01	A_44_P311364	Clca3a1/Clca3a2	chloride channel accessory 3A1	Plasma Membrane	ion channel
3.001	A_44_P373285	SCUBE3	signal peptide, CUB domain and EGF like domain containing 3	Plasma Membrane	other
2.994	A_44_P669786	Fam78b	family with sequence similarity 78, member B	Other	other
2.992	A_44_P463504	MCAM	melanoma cell adhesion molecule	Plasma Membrane	other
2.991	A_43_P20133	SKIL	SKI like proto-oncogene	Nucleus	transcription regulator
2.979	A_44_P513322	TXK	TXK tyrosine kinase	Cytoplasm	kinase
2.978	A_44_P355928	CTSS	cathepsin S	Cytoplasm	peptidase
2.968	A_42_P708181	KNTC1	kinetochore associated 1	Nucleus	other
2.957	A_44_P365470	GDNF	glial cell derived neurotrophic factor	Extracellular Space	growth factor
2.957	A_44_P344228	HLA-DOA	major histocompatibility complex, class II, DO alpha	Plasma Membrane	transmembrane receptor
2.952	A_44_P179811	TENM3	teneurin transmembrane protein 3	Plasma Membrane	other
2.95	A_44_P470824	TRIP13	thyroid hormone receptor interactor 13	Cytoplasm	transcription regulator
2.947	A_44_P824534	POU2F2	POU class 2 homeobox 2	Nucleus	transcription regulator
2.944	A_44_P478114	CDCA2	cell division cycle associated 2	Nucleus	other
2.929	A_44_P215459	ITGA10	integrin subunit alpha 10	Plasma Membrane	other
2.925	A_44_P477620	PLA2G4A	phospholipase A2 group IVA	Cytoplasm	enzyme
2.92	A_44_P402559	OR10X1	olfactory receptor family 10 subfamily X member 1 (gene/pseudogene)	Plasma Membrane	G-protein coupled receptor
2.904	A_44_P538695	EPHB2	EPH receptor B2	Plasma Membrane	kinase
2.893	A_44_P577090	RAD51	RAD51 recombinase	Nucleus	enzyme
2.89	A_44_P114000	Olfr398	olfactory receptor 398	Plasma Membrane	G-protein coupled receptor
2.88	A_44_P686987	GPR160	G protein-coupled receptor 160	Plasma Membrane	G-protein coupled receptor
2.877	A_44_P467269	CCNF	cyclin F	Nucleus	enzyme
2.877	A_44_P1039606	CENPT	centromere protein T	Cytoplasm	other
2.875	A_44_P525969	CYBB	cytochrome b-245 beta chain	Cytoplasm	enzyme
2.873	A_44_P332429	C1S	complement C1s	Extracellular Space	peptidase
2.869	A_44_P280963	KIFC1	kinesin family member C1	Nucleus	enzyme
2.863	A_44_P393822	PLEKHO1	pleckstrin homology domain containing O1	Plasma Membrane	other
2.855	A_43_P18241	CENPU	centromere protein U	Nucleus	other
2.847	A_44_P182601	LOC103693634	uncharacterized LOC103693634	Other	other
2.843	A_44_P976153	PTPRJ	protein tyrosine phosphatase, receptor type J	Plasma Membrane	phosphatase
2.841	A_44_P276803	ZNF341	zinc finger protein 341	Nucleus	other
2.831	A_44_P515852	TPX2	TPX2, microtubule nucleation factor	Nucleus	other
2.83	A_44_P140429	ASB9	ankyrin repeat and SOCS box containing 9	Nucleus	transcription regulator
2.828	A_44_P380332	Cyfip2	cytoplasmic FMR1 interacting protein 2	Cytoplasm	other
2.823	A_44_P227065	KIF22	kinesin family member 22	Nucleus	other
2.822	A_44_P405232	TMEM119	transmembrane protein 119	Cytoplasm	other
2.816	A_43_P10723	BUB1B	BUB1 mitotic checkpoint serine/threonine kinase B	Nucleus	kinase
2.808	A_42_P814235	P2RY6	pyrimidinergic receptor P2Y6	Plasma Membrane	G-protein coupled receptor
2.804	A_44_P463309	PLK1	polo like kinase 1	Nucleus	kinase
2.796	A_44_P276120	KISS1R	KISS1 receptor	Plasma Membrane	G-protein coupled receptor
2.792	A_44_P995681	MELK	maternal embryonic leucine zipper kinase	Cytoplasm	kinase
2.787	A_44_P273783	ALDH1A3	aldehyde dehydrogenase 1 family member A3	Cytoplasm	enzyme
2.787	A_44_P464045	ARL11	ADP ribosylation factor like GTPase 11	Other	other
2.782	A_44_P839432	GLIS3	GLIS family zinc finger 3	Nucleus	transcription regulator
2.78	A_44_P423281	ETV4	ETS variant 4	Nucleus	transcription regulator
2.779	A_44_P258008	FGD2	FYVE, RhoGEF and PH domain containing 2	Cytoplasm	other
2.779	A_44_P236738	POLE2	DNA polymerase epsilon 2, accessory subunit	Nucleus	enzyme
2.778	A_43_P15524	CCND3	cyclin D3	Nucleus	kinase
2.778	A_44_P220455	CSF3R	colony stimulating factor 3 receptor	Plasma Membrane	transmembrane receptor
2.777	A_44_P517012	RAC2	ras-related C3 botulinum toxin substrate 2 (rho family, small GTP binding protein Rac2)	Cytoplasm	enzyme
2.772	A_44_P366648	STIL	SCL/TAL1 interrupting locus	Nucleus	other
2.769	A_44_P1059985	SPC24	SPC24, NDC80 kinetochore complex component	Cytoplasm	other
2.761	A_44_P410348	NLRC4	NLR family CARD domain containing 4	Cytoplasm	other
2.76	A_44_P346537	Olfr482	olfactory receptor 482	Plasma Membrane	G-protein coupled receptor
2.756	A_44_P101361	Hmga2	high mobility group AT-hook 2	Nucleus	enzyme
2.755	A_44_P992578	RRM2	ribonucleotide reductase regulatory subunit M2	Nucleus	enzyme
2.747	A_44_P730320	ECT2	epithelial cell transforming 2	Cytoplasm	other
2.747	A_44_P500935	SBK1	SH3 domain binding kinase 1	Other	kinase
2.742	A_44_P250368	TK1	thymidine kinase 1	Cytoplasm	kinase
2.741	A_44_P253108	SPC25	SPC25, NDC80 kinetochore complex component	Cytoplasm	other
2.739	A_44_P448924	Marcks	myristoylated alanine rich protein kinase C substrate	Cytoplasm	other
2.738	A_43_P11437	ASGR1	asialoglycoprotein receptor 1	Plasma Membrane	transmembrane receptor
2.738	A_43_P17028	FBLIM1	filamin binding LIM protein 1	Plasma Membrane	other
2.737	A_44_P421534	AIF1	allograft inflammatory factor 1	Nucleus	other
2.722	A_43_P12125	JUNB	JunB proto-oncogene, AP-1 transcription factor subunit	Nucleus	transcription regulator
2.715	A_44_P272894	SH3GL3	SH3 domain containing GRB2 like 3, endophilin A3	Cytoplasm	other
2.711	A_44_P507571	CCNE1	cyclin E1	Nucleus	transcription regulator
2.71	A_44_P540755	Olfr315	olfactory receptor 315	Plasma Membrane	G-protein coupled receptor
2.708	A_44_P178519	ADAMTS7	ADAM metallopeptidase with thrombospondin type 1 motif 7	Extracellular Space	peptidase
2.702	A_43_P10931	GPR68	G protein-coupled receptor 68	Plasma Membrane	G-protein coupled receptor
2.699	A_44_P527480	CCNA2	cyclin A2	Nucleus	other
2.686	A_44_P438922	KLHL6	kelch like family member 6	Other	other
2.682	A_44_P383555	C17orf53	chromosome 17 open reading frame 53	Other	other
2.679	A_44_P142594	FAM110A	family with sequence similarity 110 member A	Other	other
2.677	A_42_P787410	CACNA1B	calcium voltage-gated channel subunit alpha1 B	Plasma Membrane	ion channel
2.672	A_44_P1010816	SKA1	spindle and kinetochore associated complex subunit 1	Nucleus	other
2.668	A_44_P292568	OR2D2	olfactory receptor family 2 subfamily D member 2	Plasma Membrane	G-protein coupled receptor
2.665	A_44_P430532	CHSY1	chondroitin sulfate synthase 1	Cytoplasm	enzyme
2.665	A_44_P499209	NXNL2	nucleoredoxin-like 2	Other	transporter
2.661	A_44_P853102	DUSP16	dual specificity phosphatase 16	Nucleus	phosphatase
2.654	A_44_P227604	EME1	essential meiotic structure-specific endonuclease 1	Nucleus	enzyme
2.651	A_42_P512838	Trem2	triggering receptor expressed on myeloid cells 2	Other	other
2.65	A_42_P516379	SYNPO	synaptopodin	Cytoplasm	other
2.646	A_42_P734868	KCNAB3	potassium voltage-gated channel subfamily A regulatory beta subunit 3	Plasma Membrane	ion channel
2.642	A_44_P223446	MCM2	minichromosome maintenance complex component 2	Nucleus	enzyme
2.642	A_44_P496864	SEMA4A	semaphorin 4A	Plasma Membrane	other
2.642	A_43_P12878	ST14	suppression of tumorigenicity 14	Plasma Membrane	peptidase
2.639	A_44_P239281	CDC6	cell division cycle 6	Nucleus	other
2.638	A_44_P160877	CFH	complement factor H	Extracellular Space	other
2.635	A_44_P531324	ARHGAP9	Rho GTPase activating protein 9	Cytoplasm	other
2.635	A_44_P904810	NCKAP1L	NCK associated protein 1 like	Plasma Membrane	other
2.632	A_42_P667829	CLCNKB	chloride voltage-gated channel Kb	Plasma Membrane	ion channel
2.632	A_44_P436280	PLTP	phospholipid transfer protein	Extracellular Space	enzyme
2.626	A_44_P852545	TMEM196	transmembrane protein 196	Other	other
2.625	A_42_P807697	TYROBP	TYRO protein tyrosine kinase binding protein	Plasma Membrane	transmembrane receptor
2.624	A_44_P293904	SYK	spleen associated tyrosine kinase	Cytoplasm	kinase
2.62	A_42_P457756	PKIB	cAMP-dependent protein kinase inhibitor beta	Other	other
2.615	A_44_P267041	LAT	linker for activation of T-cells	Plasma Membrane	other
2.612	A_44_P515548	LOC685020/Pilra	paired immunoglobin-like type 2 receptor alpha	Cytoplasm	other
2.607	A_44_P975868	CD44	CD44 molecule (Indian blood group)	Plasma Membrane	other
2.601	A_43_P20544	EPHB3	EPH receptor B3	Plasma Membrane	kinase
2.601	A_44_P433935	PLAC1	placenta specific 1	Plasma Membrane	other
2.596	A_44_P442359	CHI3L1	chitinase 3 like 1	Extracellular Space	enzyme
2.59	A_43_P12404	Evl	Enah/Vasp-like	Plasma Membrane	other
2.59	A_42_P465601	MYH10	myosin heavy chain 10	Cytoplasm	enzyme
2.588	A_44_P426788	PMEPA1	prostate transmembrane protein, androgen induced 1	Plasma Membrane	other
2.587	A_44_P222166	CD86	CD86 molecule	Plasma Membrane	transmembrane receptor
2.587	A_44_P266765	Cyp2d1/Cyp2d5	cytochrome P450, family 2, subfamily d, polypeptide 1	Cytoplasm	enzyme
2.587	A_44_P309266	PBK	PDZ binding kinase	Cytoplasm	kinase
2.585	A_44_P530196	MKI67	marker of proliferation Ki-67	Nucleus	other
2.582	A_44_P404836	CP	ceruloplasmin	Extracellular Space	enzyme
2.582	A_44_P409539	PLOD2	procollagen-lysine,2-oxoglutarate 5-dioxygenase 2	Cytoplasm	enzyme
2.58	A_44_P683382	TMEM202	transmembrane protein 202	Other	other
2.579	A_44_P291175	NDC80	NDC80, kinetochore complex component	Nucleus	other
2.575	A_44_P700270	PIMREG	PICALM interacting mitotic regulator	Nucleus	other
2.57	A_44_P764517	SLC4A7	solute carrier family 4 member 7	Plasma Membrane	transporter
2.57	A_44_P260072	TBXAS1	thromboxane A synthase 1	Plasma Membrane	enzyme
2.569	A_42_P565275	ASPM	abnormal spindle microtubule assembly	Nucleus	other
2.568	A_42_P799494	HTATIP2	HIV-1 Tat interactive protein 2	Nucleus	transcription regulator
2.563	A_42_P785861	NIPSNAP3A	nipsnap homolog 3A	Nucleus	other
2.561	A_44_P415269	RHBDF2	rhomboid 5 homolog 2	Cytoplasm	other
2.55	A_44_P558463	LOC102555659	uncharacterized LOC102555659	Other	other
2.549	A_44_P103020	DBNDD2	dysbindin domain containing 2	Cytoplasm	other
2.547	A_44_P126085	MAP4K1	mitogen-activated protein kinase kinase kinase kinase 1	Cytoplasm	kinase
2.546	A_44_P1040503	PCTP	phosphatidylcholine transfer protein	Cytoplasm	transporter
2.541	A_44_P517650	ADAM17	ADAM metallopeptidase domain 17	Plasma Membrane	peptidase
2.54	A_44_P506980	KCNK13	potassium two pore domain channel subfamily K member 13	Plasma Membrane	ion channel
2.54	A_42_P458530	RIPK3	receptor interacting serine/threonine kinase 3	Plasma Membrane	kinase
2.539	A_43_P15900	CCL22	C-C motif chemokine ligand 22	Extracellular Space	cytokine
2.535	A_44_P992516	ARHGAP45	Rho GTPase activating protein 45	Cytoplasm	transporter
2.535	A_44_P140514	CENPA	centromere protein A	Nucleus	other
2.535	A_44_P1005213	NUF2	NUF2, NDC80 kinetochore complex component	Nucleus	other
2.533	A_44_P1002173	CUEDC2	CUE domain containing 2	Extracellular Space	other
2.532	A_43_P17687	TACC3	transforming acidic coiled-coil containing protein 3	Nucleus	other
2.529	A_43_P13417	FZD2	frizzled class receptor 2	Plasma Membrane	G-protein coupled receptor
2.529	A_44_P475181	SLA	Src like adaptor	Plasma Membrane	other
2.526	A_44_P492104	FERMT3	fermitin family member 3	Cytoplasm	enzyme
2.522	A_44_P1035190	BUB1	BUB1 mitotic checkpoint serine/threonine kinase	Nucleus	kinase
2.521	A_44_P1009603	GTSE1	G2 and S-phase expressed 1	Cytoplasm	other
2.513	A_43_P22080	LCP1	lymphocyte cytosolic protein 1	Cytoplasm	other
2.513	A_43_P22042	PLA2G7	phospholipase A2 group VII	Extracellular Space	enzyme
2.509	A_44_P523208	RGD1311744	similar to RIKEN cDNA 5830475I06	Other	other
2.505	A_42_P542960	RERG	RAS like estrogen regulated growth inhibitor	Nucleus	enzyme
2.499	A_44_P325005	PAK1	p21 (RAC1) activated kinase 1	Cytoplasm	kinase
2.496	A_44_P1008867	NETO2	neuropilin and tolloid like 2	Plasma Membrane	other
2.495	A_44_P406805	RFC3	replication factor C subunit 3	Nucleus	enzyme
2.491	A_44_P1030098	CDC45	cell division cycle 45	Nucleus	other
2.49	A_42_P801679	CTSE	cathepsin E	Cytoplasm	peptidase
2.489	A_44_P382423	BNC2	basonuclin 2	Nucleus	other
2.48	A_42_P626008	KNSTRN	kinetochore localized astrin/SPAG5 binding protein	Cytoplasm	other
2.48	A_44_P895970	PMP22	peripheral myelin protein 22	Plasma Membrane	other
2.478	A_44_P288333	RGD1565560	similar to ribosomal protein S11	Other	other
2.477	A_44_P372839	CENPE	centromere protein E	Nucleus	other
2.473	A_44_P744814	Hnrnpa3	heterogeneous nuclear ribonucleoprotein A3	Nucleus	transporter
2.472	A_44_P144591	CTHRC1	collagen triple helix repeat containing 1	Extracellular Space	other
2.471	A_44_P478515	FMNL3	formin like 3	Cytoplasm	other
2.471	A_44_P394636	INPP5D	inositol polyphosphate-5-phosphatase D	Cytoplasm	phosphatase
2.465	A_44_P1025102	PLSCR1	phospholipid scramblase 1	Plasma Membrane	enzyme
2.464	A_44_P475444	RGD1564614	similar to complement factor H-related protein	Cytoplasm	other
2.462	A_44_P289039	Brms1/LOC100911841	breast cancer metastasis-suppressor 1	Nucleus	other
2.461	A_44_P672457	MASTL	microtubule associated serine/threonine kinase like	Cytoplasm	kinase
2.458	A_44_P1007729	OCLN	occludin	Plasma Membrane	other
2.456	A_44_P1004886	FAM198B	family with sequence similarity 198 member B	Cytoplasm	other
2.455	A_42_P527141	FOXM1	forkhead box M1	Nucleus	transcription regulator
2.454	A_42_P762150	Ikzf1	IKAROS family zinc finger 1	Nucleus	transcription regulator
2.453	A_44_P143478	C1QC	complement C1q C chain	Extracellular Space	peptidase
2.452	A_44_P332505	ACPP	acid phosphatase, prostate	Extracellular Space	phosphatase
2.447	A_44_P435955	PILRA	paired immunoglobin like type 2 receptor alpha	Plasma Membrane	other
2.446	A_44_P461544	CCNB2	cyclin B2	Cytoplasm	kinase
2.446	A_44_P389590	CILP	cartilage intermediate layer protein	Extracellular Space	phosphatase
2.443	A_43_P20099	MELTF	melanotransferrin	Plasma Membrane	other
2.443	A_44_P551075	NFAM1	NFAT activating protein with ITAM motif 1	Plasma Membrane	transmembrane receptor
2.44	A_44_P1019604	UBE2C	ubiquitin conjugating enzyme E2 C	Cytoplasm	enzyme
2.437	A_44_P261883	BZW2	basic leucine zipper and W2 domains 2	Cytoplasm	translation regulator
2.431	A_42_P615374	C1QTNF5	C1q and TNF related 5	Plasma Membrane	transmembrane receptor
2.426	A_44_P325479	CCNB1	cyclin B1	Cytoplasm	kinase
2.422	A_43_P14233	PTTG1	pituitary tumor-transforming 1	Nucleus	transcription regulator
2.42	A_44_P369399	RAB38	RAB38, member RAS oncogene family	Cytoplasm	enzyme
2.418	A_44_P520058	UHRF1	ubiquitin like with PHD and ring finger domains 1	Nucleus	transcription regulator
2.416	A_43_P14872	SDC1	syndecan 1	Plasma Membrane	enzyme
2.415	A_44_P807649	SPRED3	sprouty related EVH1 domain containing 3	Extracellular Space	cytokine
2.413	A_44_P332834	CEP72	centrosomal protein 72	Cytoplasm	other
2.406	A_44_P158957	Zfp853	zinc finger protein 853	Other	other
2.402	A_44_P151574	Olr1401	olfactory receptor 1401	Other	other
2.397	A_43_P13117	LCP2	lymphocyte cytosolic protein 2	Cytoplasm	other
2.396	A_44_P500457	ALCAM	activated leukocyte cell adhesion molecule	Plasma Membrane	other
2.396	A_44_P956502	PIK3CD	phosphatidylinositol-4,5-bisphosphate 3-kinase catalytic subunit delta	Cytoplasm	kinase
2.387	A_44_P428420	CTSZ	cathepsin Z	Cytoplasm	peptidase
2.385	A_44_P838888	BRIP1	BRCA1 interacting protein C-terminal helicase 1	Nucleus	enzyme
2.385	A_44_P107012	BTBD16	BTB domain containing 16	Other	other
2.383	A_44_P445300	GATA6	GATA binding protein 6	Nucleus	transcription regulator
2.382	A_42_P757258	KIF20B	kinesin family member 20B	Nucleus	enzyme
2.381	A_42_P800988	PTAFR	platelet activating factor receptor	Plasma Membrane	G-protein coupled receptor
2.379	A_44_P849046	RAB32	RAB32, member RAS oncogene family	Cytoplasm	enzyme
2.378	A_44_P489862	TNFAIP8L2	TNF alpha induced protein 8 like 2	Cytoplasm	other
2.374	A_44_P677285	Abcg3l2	ATP-binding cassette, subfamily G (WHITE), member 3-like 2	Other	other
2.368	A_44_P186185	MYLPF	myosin light chain, phosphorylatable, fast skeletal muscle	Cytoplasm	other
2.367	A_44_P257582	CSF1R	colony stimulating factor 1 receptor	Plasma Membrane	kinase
2.366	A_44_P296924	RDH10	retinol dehydrogenase 10	Nucleus	enzyme
2.363	A_44_P524326	RACGAP1	Rac GTPase activating protein 1	Cytoplasm	transporter
2.358	A_44_P809374	CLCF1	cardiotrophin like cytokine factor 1	Extracellular Space	cytokine
2.352	A_43_P16771	GOLM1	golgi membrane protein 1	Cytoplasm	other
2.351	A_44_P242059	ADAM23	ADAM metallopeptidase domain 23	Plasma Membrane	peptidase
2.35	A_44_P513059	SFRP1	secreted frizzled related protein 1	Plasma Membrane	transmembrane receptor
2.346	A_43_P12413	CYBA	cytochrome b-245 alpha chain	Cytoplasm	enzyme
2.346	A_44_P153979	ZEB1	zinc finger E-box binding homeobox 1	Nucleus	transcription regulator
2.343	A_44_P384086	KCNC3	potassium voltage-gated channel subfamily C member 3	Plasma Membrane	ion channel
2.343	A_44_P368017	PCDH17	protocadherin 17	Plasma Membrane	other
2.34	A_43_P18802	PASK	PAS domain containing serine/threonine kinase	Cytoplasm	kinase
2.338	A_42_P741027	JUN	Jun proto-oncogene, AP-1 transcription factor subunit	Nucleus	transcription regulator
2.337	A_44_P279479	CAPN6	calpain 6	Cytoplasm	peptidase
2.325	A_42_P687443	RAMP3	receptor activity modifying protein 3	Plasma Membrane	transporter
2.322	A_44_P866659	ADAM8	ADAM metallopeptidase domain 8	Plasma Membrane	peptidase
2.319	A_44_P238978	CDT1	chromatin licensing and DNA replication factor 1	Nucleus	other
2.308	A_42_P545721	Snrpe	small nuclear ribonucleoprotein E	Nucleus	other
2.308	A_44_P215302	UBE2T	ubiquitin conjugating enzyme E2 T	Nucleus	enzyme
2.301	A_44_P140669	ABI3	ABI family member 3	Plasma Membrane	other
2.301	A_44_P362749	ADGRE1	adhesion G protein-coupled receptor E1	Plasma Membrane	G-protein coupled receptor
2.299	A_42_P532444	RGS12	regulator of G protein signaling 12	Nucleus	other
2.298	A_44_P206434	LMNB2	lamin B2	Nucleus	other
2.292	A_44_P373012	ARHGEF39	Rho guanine nucleotide exchange factor 39	Plasma Membrane	other
2.292	A_44_P1055780	S100A8	S100 calcium binding protein A8	Cytoplasm	other
2.288	A_44_P424135	MS4A3	membrane spanning 4-domains A3	Plasma Membrane	other
2.286	A_44_P379360	FUT7	fucosyltransferase 7	Cytoplasm	enzyme
2.282	A_44_P1002336	MDFIC	MyoD family inhibitor domain containing	Nucleus	other
2.281	A_44_P511128	NUSAP1	nucleolar and spindle associated protein 1	Nucleus	other
2.274	A_44_P234129	DLGAP5	DLG associated protein 5	Nucleus	phosphatase
2.266	A_44_P1027493	LIX1L	limb and CNS expressed 1 like	Other	other
2.264	A_44_P426608	WDHD1	WD repeat and HMG-box DNA binding protein 1	Nucleus	other
2.261	A_42_P678430	CARD9	caspase recruitment domain family member 9	Cytoplasm	other
2.26	A_44_P433259	SIPA1	signal-induced proliferation-associated 1	Cytoplasm	other
2.258	A_43_P17459	NIF3L1	NGG1 interacting factor 3 like 1	Cytoplasm	other
2.257	A_44_P607121	LHFPL2	lipoma HMGIC fusion partner-like 2	Other	enzyme
2.256	A_44_P304387	HAAO	3-hydroxyanthranilate 3,4-dioxygenase	Cytoplasm	enzyme
2.256	A_44_P506273	NEIL3	nei like DNA glycosylase 3	Nucleus	enzyme
2.255	A_43_P17424	CHAF1B	chromatin assembly factor 1 subunit B	Nucleus	other
2.255	A_44_P217744	LOC100911403/Ms4a4a	membrane-spanning 4-domains, subfamily A, member 4A	Other	other
2.246	A_42_P594613	DUSP6	dual specificity phosphatase 6	Cytoplasm	phosphatase
2.246	A_42_P791436	GFRA2	GDNF family receptor alpha 2	Plasma Membrane	transmembrane receptor
2.245	A_44_P1042711	KIF20A	kinesin family member 20A	Cytoplasm	transporter
2.242	A_44_P196146	APLNR	apelin receptor	Plasma Membrane	G-protein coupled receptor
2.238	A_44_P928825	MSR1	macrophage scavenger receptor 1	Plasma Membrane	transmembrane receptor
2.238	A_44_P251081	TTYH2	tweety family member 2	Other	ion channel
2.231	A_42_P585750	CD300LD	CD300 molecule like family member d	Plasma Membrane	other
2.226	A_44_P484393	LOC100359583/Ptma	prothymosin alpha	Cytoplasm	other
2.222	A_44_P895110	SAMD14	sterile alpha motif domain containing 14	Other	other
2.222	A_42_P564712	Taok2	TAO kinase 2	Cytoplasm	kinase
2.219	A_43_P22562	Pira2	paired-Ig-like receptor A2	Other	other
2.215	A_44_P352055	ADAMTSL5	ADAMTS like 5	Extracellular Space	other
2.214	A_44_P505039	CDK2	cyclin dependent kinase 2	Nucleus	kinase
2.211	A_42_P799208	CHST11	carbohydrate sulfotransferase 11	Cytoplasm	enzyme
2.209	A_42_P661600	Reg3a	regenerating islet-derived 3 alpha	Extracellular Space	other
2.206	A_44_P265911	CNR2	cannabinoid receptor 2	Plasma Membrane	G-protein coupled receptor
2.206	A_43_P23108	MCM7	minichromosome maintenance complex component 7	Nucleus	enzyme
2.203	A_44_P333403	TROAP	trophinin associated protein	Cytoplasm	peptidase
2.202	A_44_P149999	C15orf39	chromosome 15 open reading frame 39	Cytoplasm	other
2.201	A_44_P229122	SPAG5	sperm associated antigen 5	Nucleus	peptidase
2.195	A_44_P358883	ZNF831	zinc finger protein 831	Other	other
2.194	A_44_P107653	DIAPH3	diaphanous related formin 3	Cytoplasm	enzyme
2.192	A_44_P100557	ZNF219	zinc finger protein 219	Nucleus	transcription regulator
2.191	A_42_P636761	GZMM	granzyme M	Cytoplasm	peptidase
2.191	A_44_P351209	PHLDA1	pleckstrin homology like domain family A member 1	Cytoplasm	other
2.188	A_44_P536780	KCNG2	potassium voltage-gated channel modifier subfamily G member 2	Plasma Membrane	ion channel
2.187	A_44_P248133	TAGLN2	transgelin 2	Cytoplasm	other
2.186	A_44_P149916	ZNF275	zinc finger protein 275	Nucleus	other
2.184	A_42_P505241	QPRT	quinolinate phosphoribosyltransferase	Cytoplasm	enzyme
2.179	A_44_P126027	PFKFB4	6-phosphofructo-2-kinase/fructose-2,6-biphosphatase 4	Cytoplasm	kinase
2.178	A_44_P190568	CD83	CD83 molecule	Plasma Membrane	transmembrane receptor
2.176	A_43_P13685	AHNAK2	AHNAK nucleoprotein 2	Cytoplasm	other
2.176	A_44_P831755	CCER1	coiled-coil glutamate rich protein 1	Other	other
2.175	A_42_P606126	MMP13	matrix metallopeptidase 13	Extracellular Space	peptidase
2.175	A_42_P618372	Nradd	neurotrophin receptor associated death domain	Extracellular Space	cytokine
2.173	A_44_P592923	DDIAS	DNA damage induced apoptosis suppressor	Cytoplasm	other
2.173	A_44_P340345	RPL10L	ribosomal protein L10 like	Nucleus	other
2.172	A_44_P424481	RCC2	regulator of chromosome condensation 2	Nucleus	other
2.168	A_44_P1033521	TRPS1	transcriptional repressor GATA binding 1	Nucleus	transcription regulator
2.167	A_44_P500051	SORCS2	sortilin related VPS10 domain containing receptor 2	Plasma Membrane	transporter
2.166	A_43_P11839	MEOX2	mesenchyme homeobox 2	Nucleus	transcription regulator
2.162	A_44_P295680	CNN2	calponin 2	Cytoplasm	other
2.161	A_42_P567527	TRAF4	TNF receptor associated factor 4	Cytoplasm	other
2.16	A_44_P545945	FRMD8	FERM domain containing 8	Other	other
2.16	A_44_P896682	Rhou	ras homolog family member U	Other	enzyme
2.149	A_44_P487492	SSBP4	single stranded DNA binding protein 4	Nucleus	transcription regulator
2.148	A_43_P17903	C9orf50	chromosome 9 open reading frame 50	Other	other
2.148	A_44_P518576	MIS18A	MIS18 kinetochore protein A	Nucleus	other
2.147	A_44_P194806	BAALC	brain and acute leukemia, cytoplasmic	Cytoplasm	other
2.147	A_43_P17059	CRLF1	cytokine receptor like factor 1	Extracellular Space	other
2.145	A_44_P485388	CHD7	chromodomain helicase DNA binding protein 7	Nucleus	enzyme
2.137	A_44_P590505	C130050O18Rik	RIKEN cDNA C130050O18 gene	Other	other
2.137	A_44_P988451	H2AFX	H2A histone family member X	Nucleus	transcription regulator
2.137	A_43_P17762	IL4I1	interleukin 4 induced 1	Cytoplasm	enzyme
2.136	A_42_P614692	OPLAH	5-oxoprolinase (ATP-hydrolysing)	Cytoplasm	enzyme
2.133	A_44_P526866	KLF5	Kruppel like factor 5	Nucleus	transcription regulator
2.13	A_44_P363647	EZH2	enhancer of zeste 2 polycomb repressive complex 2 subunit	Nucleus	transcription regulator
2.128	A_44_P1041312	FES	FES proto-oncogene, tyrosine kinase	Cytoplasm	kinase
2.127	A_44_P253196	ARID5B	AT-rich interaction domain 5B	Nucleus	transcription regulator
2.127	A_44_P337300	IL4R	interleukin 4 receptor	Plasma Membrane	transmembrane receptor
2.125	A_44_P449929	MAPK11	mitogen-activated protein kinase 11	Cytoplasm	kinase
2.125	A_43_P12508	PTGER2	prostaglandin E receptor 2	Plasma Membrane	G-protein coupled receptor
2.122	A_44_P123887	SMC4	structural maintenance of chromosomes 4	Nucleus	transporter
2.119	A_44_P386359	NINJ1	ninjurin 1	Plasma Membrane	other
2.119	A_44_P463891	STARD13	StAR related lipid transfer domain containing 13	Cytoplasm	other
2.117	A_43_P12589	EPHA3	EPH receptor A3	Plasma Membrane	kinase
2.116	A_44_P309008	KIF11	kinesin family member 11	Nucleus	other
2.116	A_44_P262517	LOC689412	similar to CG4025-PA	Other	other
2.116	A_44_P787936	STAT3	signal transducer and activator of transcription 3	Nucleus	transcription regulator
2.115	A_44_P823094	LRRK1	leucine rich repeat kinase 1	Cytoplasm	kinase
2.113	A_44_P200116	PDE10A	phosphodiesterase 10A	Cytoplasm	enzyme
2.112	A_44_P478066	INCENP	inner centromere protein	Nucleus	other
2.111	A_44_P562607	EGFLAM	EGF like, fibronectin type III and laminin G domains	Extracellular Space	other
2.108	A_44_P777483	LBH	limb bud and heart development	Nucleus	transcription regulator
2.107	A_44_P347340	CCDC15	coiled-coil domain containing 15	Cytoplasm	other
2.107	A_44_P333293	TRABD2B	TraB domain containing 2B	Plasma Membrane	peptidase
2.105	A_44_P594610	CDCA8	cell division cycle associated 8	Nucleus	other
2.104	A_44_P1018447	MICALL2	MICAL like 2	Cytoplasm	other
2.104	A_43_P11116	Prss30	protease, serine 30	Plasma Membrane	peptidase
2.102	A_44_P655718	FAM72A	family with sequence similarity 72 member A	Cytoplasm	other
2.1	A_44_P1023801	KIF23	kinesin family member 23	Cytoplasm	other
2.096	A_44_P467557	C1QB	complement C1q B chain	Extracellular Space	peptidase
2.094	A_43_P21957	CD7	CD7 molecule	Plasma Membrane	other
2.094	A_44_P100443	UNG	uracil DNA glycosylase	Nucleus	enzyme
2.089	A_44_P386792	KIF26B	kinesin family member 26B	Other	other
2.084	A_44_P428487	GUSB	glucuronidase beta	Cytoplasm	enzyme
2.083	A_44_P526978	BMP3	bone morphogenetic protein 3	Extracellular Space	growth factor
2.081	A_44_P526975	CCHCR1	coiled-coil alpha-helical rod protein 1	Cytoplasm	other
2.079	A_44_P435059	Hmgb3	high mobility group box 3	Nucleus	other
2.077	A_42_P810736	TIMELESS	timeless circadian clock	Nucleus	other
2.073	A_44_P431150	POLE	DNA polymerase epsilon, catalytic subunit	Nucleus	enzyme
2.072	A_44_P358028	NT5C	5', 3'-nucleotidase, cytosolic	Cytoplasm	phosphatase
2.071	A_42_P586141	PLCD1	phospholipase C delta 1	Cytoplasm	enzyme
2.069	A_44_P696866	HMG20A	high mobility group 20A	Nucleus	transcription regulator
2.069	A_44_P480858	RGS22	regulator of G protein signaling 22	Cytoplasm	other
2.068	A_42_P599116	PHLDB3	pleckstrin homology like domain family B member 3	Other	other
2.067	A_44_P473159	CENPI	centromere protein I	Nucleus	other
2.067	A_42_P552640	MMP16	matrix metallopeptidase 16	Extracellular Space	peptidase
2.066	A_42_P522899	TGFB1	transforming growth factor beta 1	Extracellular Space	growth factor
2.064	A_43_P19527	Abcg3	ATP-binding cassette, sub-family G (WHITE), member 3	Plasma Membrane	transporter
2.064	A_44_P457342	SLITRK2	SLIT and NTRK like family member 2	Plasma Membrane	other
2.063	A_44_P900083	SPATA46	spermatogenesis associated 46	Nucleus	other
2.061	A_44_P378742	FLRT3	fibronectin leucine rich transmembrane protein 3	Plasma Membrane	other
2.061	A_44_P109608	GSTA1	glutathione S-transferase alpha 1	Cytoplasm	enzyme
2.061	A_44_P1040685	IER5L	immediate early response 5 like	Other	other
2.058	A_44_P884566	NKAIN1	sodium/potassium transporting ATPase interacting 1	Plasma Membrane	other
2.055	A_44_P465148	Hist1h1e	histone cluster 1, H1e	Nucleus	other
2.052	A_42_P588944	MGP	matrix Gla protein	Extracellular Space	other
2.05	A_42_P728794	SRPX2	sushi repeat containing protein, X-linked 2	Cytoplasm	other
2.049	A_44_P555213	CENPF	centromere protein F	Nucleus	other
2.049	A_44_P263159	MID1	midline 1	Nucleus	other
2.046	A_44_P1020967	NSD2	nuclear receptor binding SET domain protein 2	Nucleus	enzyme
2.045	A_44_P457362	COL16A1	collagen type XVI alpha 1 chain	Extracellular Space	other
2.038	A_43_P20902	DONSON	downstream neighbor of SON	Extracellular Space	other
2.037	A_44_P562505	PLXDC1	plexin domain containing 1	Plasma Membrane	other
2.035	A_44_P238927	KIF18A	kinesin family member 18A	Cytoplasm	enzyme
2.031	A_44_P455145	PLXNB2	plexin B2	Plasma Membrane	transmembrane receptor
2.03	A_42_P479348	HHIPL1	HHIP like 1	Other	other
2.03	A_44_P763063	KIAA1217	KIAA1217	Cytoplasm	other
2.029	A_44_P556528	EMILIN1	elastin microfibril interfacer 1	Extracellular Space	other
2.029	A_44_P458570	FUT4	fucosyltransferase 4	Cytoplasm	enzyme
2.028	A_42_P598934	Lrrfip1	LRR binding FLII interacting protein 1	Other	other
2.027	A_44_P384273	KCNK12	potassium two pore domain channel subfamily K member 12	Plasma Membrane	ion channel
2.023	A_43_P12626	MSLN	mesothelin	Extracellular Space	other
2.022	A_42_P794130	CDC20	cell division cycle 20	Nucleus	other
2.021	A_44_P914382	EDNRA	endothelin receptor type A	Plasma Membrane	transmembrane receptor
2.021	A_44_P168986	RGD1562415	similar to 40S ribosomal protein S26	Other	other
2.014	A_44_P555399	FIGNL1	fidgetin like 1	Nucleus	enzyme
2.012	A_44_P547825	INSL3	insulin like 3	Extracellular Space	growth factor
2.011	A_44_P868890	GLI2	GLI family zinc finger 2	Nucleus	transcription regulator
2.01	A_44_P996233	Prim1	primase (DNA) subunit 1	Other	other
2.009	A_43_P15701	RAB13	RAB13, member RAS oncogene family	Plasma Membrane	enzyme
2.006	A_42_P560996	ITGA9	integrin subunit alpha 9	Plasma Membrane	other
2.005	A_44_P203195	MADD	MAP kinase activating death domain	Cytoplasm	other
2.005	A_44_P291102	SMPD5	sphingomyelin phosphodiesterase 5	Cytoplasm	enzyme
2.004	A_44_P428507	NFKBIE	NFKB inhibitor epsilon	Nucleus	transcription regulator
2.002	A_44_P483238	HOXC5	homeobox C5	Nucleus	transcription regulator
2.001	A_44_P351452	BMP1	bone morphogenetic protein 1	Extracellular Space	peptidase
-2.008	A_44_P554410	MAGT1	magnesium transporter 1	Plasma Membrane	enzyme
-2.013	A_44_P436195	C6orf52	chromosome 6 open reading frame 52	Other	other
-2.017	A_44_P356322	Tmem80	transmembrane protein 80	Other	other
-2.018	A_44_P945920	ZFHX2	zinc finger homeobox 2	Nucleus	other
-2.019	A_44_P859235	DCUN1D3	defective in cullin neddylation 1 domain containing 3	Cytoplasm	other
-2.02	A_44_P134342	PARD6B	par-6 family cell polarity regulator beta	Plasma Membrane	other
-2.027	A_44_P553262	HACD3	3-hydroxyacyl-CoA dehydratase 3	Cytoplasm	enzyme
-2.029	A_44_P529005	C20orf194	chromosome 20 open reading frame 194	Nucleus	other
-2.031	A_44_P514379	ACACA	acetyl-CoA carboxylase alpha	Cytoplasm	enzyme
-2.031	A_44_P155956	DNAJA4	DnaJ heat shock protein family (Hsp40) member A4	Nucleus	other
-2.033	A_43_P18918	ACBD5	acyl-CoA binding domain containing 5	Nucleus	other
-2.037	A_42_P581836	FAM178B	family with sequence similarity 178 member B	Other	other
-2.038	A_44_P561626	UBE2Q2	ubiquitin conjugating enzyme E2 Q2	Cytoplasm	enzyme
-2.045	A_44_P183160	HOXC11	homeobox C11	Nucleus	transcription regulator
-2.046	A_43_P14971	PXMP2	peroxisomal membrane protein 2	Cytoplasm	other
-2.049	A_44_P756922	GLYCTK	glycerate kinase	Cytoplasm	kinase
-2.055	A_44_P322608	FIS1	fission, mitochondrial 1	Cytoplasm	other
-2.055	A_42_P764985	NAP1L3	nucleosome assembly protein 1 like 3	Nucleus	other
-2.055	A_44_P259125	NKIRAS1	NFKB inhibitor interacting Ras like 1	Other	enzyme
-2.061	A_44_P575034	MFSD14A	major facilitator superfamily domain containing 14A	Other	transporter
-2.065	A_44_P240781	CAV1	caveolin 1	Plasma Membrane	transmembrane receptor
-2.066	A_44_P659008	PEX19	peroxisomal biogenesis factor 19	Cytoplasm	other
-2.066	A_42_P509766	PPARA	peroxisome proliferator activated receptor alpha	Nucleus	ligand-dependent nuclear receptor
-2.07	A_44_P1010087	HOXA2	homeobox A2	Nucleus	transcription regulator
-2.071	A_44_P762095	IGIP	IgA inducing protein	Other	other
-2.071	A_44_P391360	ZHX1	zinc fingers and homeoboxes 1	Nucleus	transcription regulator
-2.072	A_44_P509865	PLA2G16	phospholipase A2 group XVI	Nucleus	enzyme
-2.074	A_44_P260624	PPCDC	phosphopantothenoylcysteine decarboxylase	Cytoplasm	enzyme
-2.074	A_44_P510222	Rnf122	ring finger protein 122	Other	other
-2.078	A_44_P487157	RAB6A	RAB6A, member RAS oncogene family	Cytoplasm	enzyme
-2.082	A_44_P407132	TWIST2	twist family bHLH transcription factor 2	Nucleus	transcription regulator
-2.086	A_44_P325133	ADAMTSL2	ADAMTS like 2	Extracellular Space	other
-2.09	A_44_P110542	DBNL	drebrin like	Cytoplasm	other
-2.096	A_43_P12832	NOL3	nucleolar protein 3	Nucleus	other
-2.096	A_42_P693715	Rasl10a	RAS-like, family 10, member A	Other	other
-2.099	A_44_P479359	MVK	mevalonate kinase	Cytoplasm	kinase
-2.1	A_43_P14163	ODC1	ornithine decarboxylase 1	Cytoplasm	enzyme
-2.101	A_44_P418944	ENTPD5	ectonucleoside triphosphate diphosphohydrolase 5	Cytoplasm	enzyme
-2.106	A_44_P543643	IQCJ-SCHIP1	IQCJ-SCHIP1 readthrough	Cytoplasm	other
-2.107	A_44_P434271	CNTN2	contactin 2	Plasma Membrane	other
-2.112	A_44_P175349	CRISPLD2	cysteine rich secretory protein LCCL domain containing 2	Cytoplasm	other
-2.114	A_44_P531758	CRYAB	crystallin alpha B	Nucleus	other
-2.121	A_44_P104804	SARAF	store-operated calcium entry associated regulatory factor	Cytoplasm	other
-2.121	A_44_P463878	SLC38A2	solute carrier family 38 member 2	Plasma Membrane	transporter
-2.123	A_44_P514431	LOC100912084	cAMP-dependent protein kinase catalytic subunit PRKX-like	Other	other
-2.124	A_44_P484332	HSPA12A	heat shock protein family A (Hsp70) member 12A	Cytoplasm	other
-2.124	A_44_P730489	STARD10	StAR related lipid transfer domain containing 10	Cytoplasm	other
-2.129	A_44_P350521	COL1A1	collagen type I alpha 1 chain	Extracellular Space	other
-2.129	A_42_P529780	SPDYA	speedy/RINGO cell cycle regulator family member A	Nucleus	other
-2.129	A_44_P590999	TC2N	tandem C2 domains, nuclear	Nucleus	transporter
-2.139	A_44_P306932	GIPC2	GIPC PDZ domain containing family member 2	Cytoplasm	other
-2.14	A_44_P380575	SLC7A5	solute carrier family 7 member 5	Plasma Membrane	transporter
-2.141	A_44_P291521	LOC103691479	uncharacterized LOC103691479	Other	other
-2.144	A_44_P544386	NACC2	NACC family member 2	Nucleus	transcription regulator
-2.149	A_44_P419004	AGPAT1	1-acylglycerol-3-phosphate O-acyltransferase 1	Cytoplasm	enzyme
-2.158	A_43_P13381	POMC	proopiomelanocortin	Extracellular Space	other
-2.16	A_44_P385688	RAB40B	RAB40B, member RAS oncogene family	Plasma Membrane	enzyme
-2.162	A_44_P823790	GNAO1	G protein subunit alpha o1	Plasma Membrane	enzyme
-2.169	A_43_P14099	YIPF6	Yip1 domain family member 6	Cytoplasm	other
-2.171	A_44_P302697	ARHGAP31	Rho GTPase activating protein 31	Cytoplasm	other
-2.172	A_44_P1046787	SBSPON	somatomedin B and thrombospondin type 1 domain containing	Extracellular Space	other
-2.176	A_44_P623125	SPTLC2	serine palmitoyltransferase long chain base subunit 2	Cytoplasm	enzyme
-2.181	A_44_P109862	IVNS1ABP	influenza virus NS1A binding protein	Nucleus	other
-2.188	A_44_P596424	ADAMTSL1	ADAMTS like 1	Extracellular Space	other
-2.188	A_44_P1050200	C1QTNF12	C1q and TNF related 12	Extracellular Space	other
-2.189	A_44_P621013	OLFML1	olfactomedin like 1	Extracellular Space	other
-2.191	A_44_P187056	ITGA6	integrin subunit alpha 6	Plasma Membrane	transmembrane receptor
-2.193	A_44_P533193	ANKRD13A	ankyrin repeat domain 13A	Plasma Membrane	other
-2.198	A_44_P128932	MRM3	mitochondrial rRNA methyltransferase 3	Cytoplasm	enzyme
-2.198	A_44_P156589	NGEF	neuronal guanine nucleotide exchange factor	Cytoplasm	other
-2.21	A_44_P286245	CRBN	cereblon	Cytoplasm	enzyme
-2.216	A_43_P17969	NRCAM	neuronal cell adhesion molecule	Plasma Membrane	other
-2.218	A_43_P17743	PIR	pirin	Nucleus	transcription regulator
-2.22	A_44_P252976	GSTO2	glutathione S-transferase omega 2	Cytoplasm	enzyme
-2.223	A_44_P319256	KDELR3	KDEL endoplasmic reticulum protein retention receptor 3	Cytoplasm	transporter
-2.227	A_44_P789583	TMEM47	transmembrane protein 47	Plasma Membrane	other
-2.229	A_44_P697841	COX11	COX11, cytochrome c oxidase copper chaperone	Cytoplasm	enzyme
-2.23	A_42_P522857	MGST3	microsomal glutathione S-transferase 3	Cytoplasm	enzyme
-2.234	A_44_P592790	PANK1	pantothenate kinase 1	Cytoplasm	kinase
-2.235	A_44_P973511	LRP11	LDL receptor related protein 11	Other	other
-2.242	A_44_P173244	TCTA	T-cell leukemia translocation altered	Other	other
-2.243	A_44_P247966	NELL1	neural EGFL like 1	Extracellular Space	growth factor
-2.245	A_42_P676630	GPLD1	glycosylphosphatidylinositol specific phospholipase D1	Cytoplasm	enzyme
-2.246	A_42_P634930	RCAN2	regulator of calcineurin 2	Other	other
-2.252	A_44_P503809	OXCT1	3-oxoacid CoA-transferase 1	Cytoplasm	enzyme
-2.257	A_44_P487123	SLC25A27	solute carrier family 25 member 27	Cytoplasm	transporter
-2.263	A_43_P18107	FRY	FRY microtubule binding protein	Extracellular Space	other
-2.264	A_44_P123785	LYRM1	LYR motif containing 1	Cytoplasm	other
-2.266	A_44_P266454	RNF181	ring finger protein 181	Cytoplasm	enzyme
-2.27	A_43_P20743	ELMO1	engulfment and cell motility 1	Cytoplasm	other
-2.284	A_42_P809869	TST	thiosulfate sulfurtransferase	Cytoplasm	enzyme
-2.295	A_44_P130811	ARSK	arylsulfatase family member K	Extracellular Space	enzyme
-2.305	A_42_P489817	PPM1L	protein phosphatase, Mg2+/Mn2+ dependent 1L	Cytoplasm	phosphatase
-2.318	A_44_P324554	NDNF	neuron derived neurotrophic factor	Extracellular Space	other
-2.322	A_44_P217063	ARL8B	ADP ribosylation factor like GTPase 8B	Plasma Membrane	enzyme
-2.324	A_44_P714860	SERF2	small EDRK-rich factor 2	Other	other
-2.331	A_43_P15662	TFRC	transferrin receptor	Plasma Membrane	transporter
-2.333	A_44_P410203	CCM2L	CCM2 like scaffolding protein	Other	other
-2.338	A_44_P487530	TMEM56	transmembrane protein 56	Other	other
-2.341	A_44_P374586	CYB5A	cytochrome b5 type A	Cytoplasm	enzyme
-2.341	A_44_P304842	TLE1	transducin like enhancer of split 1	Nucleus	transcription regulator
-2.346	A_44_P331276	FHIT	fragile histidine triad	Cytoplasm	enzyme
-2.349	A_44_P632544	TPD52	tumor protein D52	Cytoplasm	other
-2.359	A_44_P118137	DDHD1	DDHD domain containing 1	Extracellular Space	enzyme
-2.359	A_44_P338109	SGCD	sarcoglycan delta	Cytoplasm	other
-2.37	A_44_P1004781	SGCB	sarcoglycan beta	Plasma Membrane	other
-2.383	A_43_P12247	ALDH1L1	aldehyde dehydrogenase 1 family member L1	Cytoplasm	enzyme
-2.393	A_44_P157690	SNRPN	small nuclear ribonucleoprotein polypeptide N	Nucleus	other
-2.394	A_44_P197207	MRPS7	mitochondrial ribosomal protein S7	Cytoplasm	other
-2.396	A_43_P12275	NAT8	N-acetyltransferase 8 (putative)	Nucleus	transcription regulator
-2.398	A_42_P665879	ATF5	activating transcription factor 5	Nucleus	transcription regulator
-2.403	A_44_P227221	SYDE2	synapse defective Rho GTPase homolog 2	Cytoplasm	other
-2.404	A_44_P556959	P4HTM	prolyl 4-hydroxylase, transmembrane	Cytoplasm	enzyme
-2.405	A_43_P16139	Ralgps2	Ral GEF with PH domain and SH3 binding motif 2	Other	other
-2.408	A_44_P544757	TMEM178B	transmembrane protein 178B	Other	other
-2.412	A_44_P794608	CCDC6	coiled-coil domain containing 6	Cytoplasm	other
-2.414	A_44_P197337	MERTK	MER proto-oncogene, tyrosine kinase	Plasma Membrane	kinase
-2.416	A_44_P998500	DRC3	dynein regulatory complex subunit 3	Cytoplasm	other
-2.417	A_44_P588315	LYVE1	lymphatic vessel endothelial hyaluronan receptor 1	Plasma Membrane	transmembrane receptor
-2.451	A_43_P13836	NCOR1	nuclear receptor corepressor 1	Nucleus	transcription regulator
-2.453	A_44_P313815	TESK2	testis-specific kinase 2	Nucleus	kinase
-2.459	A_44_P548420	PMVK	phosphomevalonate kinase	Cytoplasm	kinase
-2.46	A_42_P464378	ITIH3	inter-alpha-trypsin inhibitor heavy chain 3	Extracellular Space	other
-2.466	A_44_P346832	TESC	tescalcin	Cytoplasm	other
-2.467	A_44_P472442	BNIP3	BCL2 interacting protein 3	Cytoplasm	other
-2.474	A_44_P201601	GLCCI1	glucocorticoid induced 1	Cytoplasm	other
-2.482	A_44_P517896	HSD17B12	hydroxysteroid 17-beta dehydrogenase 12	Cytoplasm	enzyme
-2.482	A_43_P17162	SNX13	sorting nexin 13	Cytoplasm	transporter
-2.484	A_44_P899938	FAM124A	family with sequence similarity 124 member A	Other	other
-2.485	A_44_P605240	Pln	phospholamban	Cytoplasm	other
-2.487	A_44_P315106	CFL2	cofilin 2	Extracellular Space	other
-2.487	A_44_P1020428	Nes	nestin	Cytoplasm	other
-2.502	A_43_P20288	SFMBT1	Scm-like with four mbt domains 1	Nucleus	transcription regulator
-2.506	A_44_P975471	RGD1560398	RGD1560398	Other	other
-2.51	A_43_P13088	MSMO1	methylsterol monooxygenase 1	Cytoplasm	enzyme
-2.513	A_44_P396772	LRRN1	leucine rich repeat neuronal 1	Other	other
-2.52	A_43_P15252	COL2A1	collagen type II alpha 1 chain	Extracellular Space	other
-2.52	A_44_P412170	P4HA1	prolyl 4-hydroxylase subunit alpha 1	Cytoplasm	enzyme
-2.523	A_43_P11651	PEMT	phosphatidylethanolamine N-methyltransferase	Cytoplasm	enzyme
-2.527	A_43_P21980	GNAT2	G protein subunit alpha transducin 2	Plasma Membrane	enzyme
-2.531	A_44_P198804	NRXN2	neurexin 2	Plasma Membrane	transporter
-2.536	A_44_P825566	TUBB4A	tubulin beta 4A class IVa	Cytoplasm	other
-2.541	A_44_P995374	Cystm1	cysteine-rich transmembrane module containing 1	Cytoplasm	other
-2.542	A_43_P17382	CARMIL1	capping protein regulator and myosin 1 linker 1	Cytoplasm	enzyme
-2.55	A_44_P547771	CITED1	Cbp/p300 interacting transactivator with Glu/Asp rich carboxy-terminal domain 1	Nucleus	transcription regulator
-2.555	A_44_P201077	ASRGL1	asparaginase like 1	Cytoplasm	enzyme
-2.557	A_44_P432965	FDPS	farnesyl diphosphate synthase	Cytoplasm	enzyme
-2.562	A_44_P520349	BRDT	bromodomain testis associated	Nucleus	kinase
-2.58	A_44_P442780	KCNAB1	potassium voltage-gated channel subfamily A member regulatory beta subunit 1	Plasma Membrane	ion channel
-2.585	A_42_P525317	CACNB2	calcium voltage-gated channel auxiliary subunit beta 2	Plasma Membrane	ion channel
-2.585	A_44_P734941	OGFRL1	opioid growth factor receptor like 1	Other	other
-2.59	A_44_P499056	PAQR3	progestin and adipoQ receptor family member 3	Cytoplasm	other
-2.591	A_43_P20794	OSBPL5	oxysterol binding protein like 5	Cytoplasm	transporter
-2.596	A_43_P19890	CDKL5	cyclin dependent kinase like 5	Nucleus	kinase
-2.612	A_44_P1036740	Tnxa-ps1	tenascin XA, pseudogene 1	Cytoplasm	other
-2.614	A_44_P392234	FGF7	fibroblast growth factor 7	Extracellular Space	growth factor
-2.615	A_43_P17836	OTUD6B	OTU domain containing 6B	Other	other
-2.621	A_43_P18228	SELENOI	selenoprotein I	Cytoplasm	enzyme
-2.621	A_44_P260358	SLC27A4	solute carrier family 27 member 4	Plasma Membrane	transporter
-2.624	A_44_P536115	ARHGEF9	Cdc42 guanine nucleotide exchange factor 9	Cytoplasm	other
-2.625	A_44_P105448	Col4a5	collagen type IV alpha 5 chain	Extracellular Space	other
-2.627	A_44_P463659	CMTM6	CKLF like MARVEL transmembrane domain containing 6	Extracellular Space	cytokine
-2.629	A_42_P702691	FIG4	FIG4 phosphoinositide 5-phosphatase	Cytoplasm	enzyme
-2.638	A_44_P409493	PDGFD	platelet derived growth factor D	Extracellular Space	growth factor
-2.646	A_44_P117119	HPDL	4-hydroxyphenylpyruvate dioxygenase like	Other	other
-2.648	A_44_P291157	FAM126B	family with sequence similarity 126 member B	Other	other
-2.651	A_44_P272148	SPIRE2	spire type actin nucleation factor 2	Cytoplasm	other
-2.655	A_44_P144857	ENPEP	glutamyl aminopeptidase	Plasma Membrane	peptidase
-2.663	A_43_P21719	MPZL2	myelin protein zero like 2	Plasma Membrane	other
-2.676	A_44_P808769	CLCN4	chloride voltage-gated channel 4	Plasma Membrane	ion channel
-2.679	A_44_P960805	GCA	grancalcin	Cytoplasm	other
-2.68	A_43_P22657	SATB1	SATB homeobox 1	Nucleus	transcription regulator
-2.681	A_44_P229481	PAQR6	progestin and adipoQ receptor family member 6	Plasma Membrane	other
-2.682	A_44_P578044	GREB1L	growth regulation by estrogen in breast cancer 1 like	Extracellular Space	other
-2.687	A_43_P16050	WNT11	Wnt family member 11	Extracellular Space	other
-2.689	A_44_P144232	FGL2	fibrinogen like 2	Extracellular Space	peptidase
-2.689	A_44_P187293	PEA15	phosphoprotein enriched in astrocytes 15	Cytoplasm	transporter
-2.692	A_44_P274397	CERS2	ceramide synthase 2	Nucleus	transcription regulator
-2.711	A_42_P553444	PCSK5	proprotein convertase subtilisin/kexin type 5	Extracellular Space	peptidase
-2.713	A_42_P726132	TMEM62	transmembrane protein 62	Other	enzyme
-2.715	A_42_P462771	CD9	CD9 molecule	Plasma Membrane	other
-2.716	A_43_P19284	BCAR3	breast cancer anti-estrogen resistance 3	Cytoplasm	other
-2.717	A_44_P222632	DUSP15	dual specificity phosphatase 15	Cytoplasm	phosphatase
-2.721	A_44_P1000722	FILIP1	filamin A interacting protein 1	Cytoplasm	other
-2.732	A_44_P287564	EBP	emopamil binding protein (sterol isomerase)	Cytoplasm	enzyme
-2.745	A_44_P764174	FCMR	Fc fragment of IgM receptor	Plasma Membrane	other
-2.749	A_44_P687542	ZNF106	zinc finger protein 106	Cytoplasm	other
-2.756	A_44_P137334	TFB1M	transcription factor B1, mitochondrial	Cytoplasm	transcription regulator
-2.765	A_42_P761436	NPW	neuropeptide W	Extracellular Space	other
-2.774	A_43_P20053	FUT8	fucosyltransferase 8	Cytoplasm	enzyme
-2.774	A_44_P151482	IL22RA2	interleukin 22 receptor subunit alpha 2	Plasma Membrane	transmembrane receptor
-2.783	A_44_P322960	ARAF	A-Raf proto-oncogene, serine/threonine kinase	Cytoplasm	kinase
-2.784	A_44_P166161	ADH7	alcohol dehydrogenase 7 (class IV), mu or sigma polypeptide	Cytoplasm	enzyme
-2.784	A_44_P373567	TMEM117	transmembrane protein 117	Cytoplasm	other
-2.792	A_44_P1051981	EVPL	envoplakin	Plasma Membrane	other
-2.793	A_44_P203145	CACNA1C	calcium voltage-gated channel subunit alpha1 C	Plasma Membrane	ion channel
-2.794	A_43_P12085	Dbil5	diazepam binding inhibitor-like 5	Cytoplasm	other
-2.798	A_44_P401170	TMEM50B	transmembrane protein 50B	Plasma Membrane	other
-2.801	A_43_P13409	ZDHHC2	zinc finger DHHC-type containing 2	Nucleus	enzyme
-2.802	A_43_P12586	PTGIS	prostaglandin I2 synthase	Cytoplasm	enzyme
-2.814	A_44_P977988	LOC103692581	uncharacterized LOC103692581	Other	other
-2.815	A_42_P824178	Slc25a1	solute carrier family 25 (mitochondrial carrier, citrate transporter), member 1	Cytoplasm	transporter
-2.815	A_44_P182431	SRD5A1	steroid 5 alpha-reductase 1	Cytoplasm	enzyme
-2.823	A_44_P203793	MLLT11	myeloid/lymphoid or mixed-lineage leukemia; translocated to, 11	Cytoplasm	other
-2.824	A_44_P407573	CNFN	cornifelin	Cytoplasm	other
-2.825	A_43_P19450	PRKCA	protein kinase C alpha	Cytoplasm	kinase
-2.829	A_44_P508935	HACD4	3-hydroxyacyl-CoA dehydratase 4	Cytoplasm	enzyme
-2.839	A_43_P14633	Zfp651	zinc finger protein 651	Other	other
-2.848	A_44_P527024	COL11A2	collagen type XI alpha 2 chain	Extracellular Space	other
-2.848	A_43_P11729	HMGCR	3-hydroxy-3-methylglutaryl-CoA reductase	Cytoplasm	enzyme
-2.85	A_43_P12780	AGPS	alkylglycerone phosphate synthase	Cytoplasm	enzyme
-2.861	A_44_P367421	SLC4A4	solute carrier family 4 member 4	Plasma Membrane	transporter
-2.866	A_42_P646290	GNAZ	G protein subunit alpha z	Plasma Membrane	enzyme
-2.884	A_44_P441434	CAV2	caveolin 2	Plasma Membrane	other
-2.894	A_43_P12695	NCOA2	nuclear receptor coactivator 2	Nucleus	transcription regulator
-2.895	A_44_P618099	ARVCF	armadillo repeat gene deleted in velocardiofacial syndrome	Plasma Membrane	other
-2.902	A_44_P215393	FAM107A	family with sequence similarity 107 member A	Nucleus	other
-2.908	A_44_P191822	Nat8f5	N-acetyltransferase 8 (GCN5-related) family member 5	Other	enzyme
-2.908	A_44_P241781	TMCC3	transmembrane and coiled-coil domain family 3	Other	other
-2.909	A_43_P10230	SLC9A6	solute carrier family 9 member A6	Plasma Membrane	transporter
-2.94	A_43_P11871	PADI3	peptidyl arginine deiminase 3	Cytoplasm	enzyme
-2.943	A_43_P15021	SLC25A29	solute carrier family 25 member 29	Cytoplasm	transporter
-2.947	A_44_P840399	LOC102553942	uncharacterized LOC102553942	Other	other
-2.954	A_42_P614175	GAL	galanin and GMAP prepropeptide	Extracellular Space	other
-2.954	A_44_P668388	WDR54	WD repeat domain 54	Other	other
-2.966	A_44_P484474	LSMEM2	leucine rich single-pass membrane protein 2	Other	other
-2.985	A_43_P11546	Cd24a	CD24a antigen	Plasma Membrane	other
-2.996	A_43_P14910	DDC	dopa decarboxylase	Cytoplasm	enzyme
-2.999	A_44_P595964	IQSEC1	IQ motif and Sec7 domain 1	Cytoplasm	other
-3.002	A_44_P1040966	LRRC24	leucine rich repeat containing 24	Other	other
-3.003	A_44_P123636	COL11A1	collagen type XI alpha 1 chain	Extracellular Space	other
-3.009	A_44_P133060	NIPA1	non imprinted in Prader-Willi/Angelman syndrome 1	Plasma Membrane	transporter
-3.024	A_44_P740525	PATJ	PATJ, crumbs cell polarity complex component	Plasma Membrane	other
-3.032	A_42_P743682	LGALS2	galectin 2	Cytoplasm	other
-3.039	A_42_P538400	NTRK2	neurotrophic receptor tyrosine kinase 2	Plasma Membrane	kinase
-3.042	A_43_P22401	Lrrc51	leucine rich repeat containing 51	Other	other
-3.054	A_44_P241241	THEM4	thioesterase superfamily member 4	Plasma Membrane	enzyme
-3.055	A_44_P215689	LOC100912852	disks large homolog 5-like	Other	other
-3.057	A_44_P996557	PTPDC1	protein tyrosine phosphatase domain containing 1	Extracellular Space	phosphatase
-3.058	A_44_P215157	LIN7B	lin-7 homolog B, crumbs cell polarity complex component	Cytoplasm	other
-3.082	A_42_P502271	FAM81A	family with sequence similarity 81 member A	Other	other
-3.095	A_44_P463871	PRKD1	protein kinase D1	Cytoplasm	kinase
-3.096	A_44_P555525	EPDR1	ependymin related 1	Nucleus	other
-3.111	A_44_P476733	NQO1	NAD(P)H quinone dehydrogenase 1	Cytoplasm	enzyme
-3.131	A_44_P289627	GRIA2	glutamate ionotropic receptor AMPA type subunit 2	Plasma Membrane	ion channel
-3.143	A_44_P235978	FASN	fatty acid synthase	Cytoplasm	enzyme
-3.144	A_44_P1042234	STMN3	stathmin 3	Nucleus	other
-3.146	A_44_P358492	FDFT1	farnesyl-diphosphate farnesyltransferase 1	Cytoplasm	enzyme
-3.163	A_44_P264293	MAOA	monoamine oxidase A	Cytoplasm	enzyme
-3.187	A_44_P1052607	AOX1	aldehyde oxidase 1	Cytoplasm	enzyme
-3.198	A_44_P415115	TSPAN13	tetraspanin 13	Plasma Membrane	other
-3.2	A_44_P409425	BBOF1	basal body orientation factor 1	Cytoplasm	other
-3.206	A_44_P179296	COL6A5	collagen type VI alpha 5 chain	Extracellular Space	other
-3.213	A_44_P792087	FGF1	fibroblast growth factor 1	Extracellular Space	growth factor
-3.226	A_42_P589812	AKAP6	A-kinase anchoring protein 6	Nucleus	other
-3.226	A_44_P971207	NUDT11	nudix hydrolase 11	Cytoplasm	phosphatase
-3.247	A_44_P653272	GPR155	G protein-coupled receptor 155	Plasma Membrane	G-protein coupled receptor
-3.247	A_44_P110044	MBOAT1	membrane bound O-acyltransferase domain containing 1	Cytoplasm	enzyme
-3.252	A_42_P589190	AACS	acetoacetyl-CoA synthetase	Cytoplasm	enzyme
-3.284	A_44_P449745	ASCL3	achaete-scute family bHLH transcription factor 3	Nucleus	transcription regulator
-3.289	A_44_P154793	IQCG	IQ motif containing G	Cytoplasm	other
-3.294	A_44_P711487	ARG2	arginase 2	Cytoplasm	enzyme
-3.308	A_44_P515211	TNFSF15	TNF superfamily member 15	Extracellular Space	cytokine
-3.318	A_44_P444632	LIMCH1	LIM and calponin homology domains 1	Other	other
-3.327	A_44_P255109	SNN	stannin	Plasma Membrane	other
-3.346	A_44_P1007110	SVIP	small VCP interacting protein	Cytoplasm	other
-3.348	A_44_P170496	SQOR	sulfide quinone oxidoreductase	Cytoplasm	enzyme
-3.358	A_43_P17213	ABHD1	abhydrolase domain containing 1	Other	other
-3.363	A_42_P543877	TLCD1	TLC domain containing 1	Other	other
-3.387	A_44_P365580	SQLE	squalene epoxidase	Cytoplasm	enzyme
-3.399	A_44_P710192	TMEM45B	transmembrane protein 45B	Extracellular Space	other
-3.409	A_44_P1030714	CCDC92	coiled-coil domain containing 92	Cytoplasm	other
-3.411	A_44_P506538	RMDN2	regulator of microtubule dynamics 2	Cytoplasm	other
-3.411	A_43_P14045	SEMA4G	semaphorin 4G	Plasma Membrane	other
-3.42	A_44_P321506	SLC25A33	solute carrier family 25 member 33	Cytoplasm	transporter
-3.439	A_44_P496255	SLCO3A1	solute carrier organic anion transporter family member 3A1	Plasma Membrane	transporter
-3.442	A_44_P491796	SPP1	secreted phosphoprotein 1	Extracellular Space	cytokine
-3.472	A_44_P245314	CACNB3	calcium voltage-gated channel auxiliary subunit beta 3	Plasma Membrane	ion channel
-3.479	A_44_P214366	ACSL1	acyl-CoA synthetase long-chain family member 1	Cytoplasm	enzyme
-3.481	A_44_P181836	SECISBP2L	SECIS binding protein 2 like	Other	other
-3.483	A_42_P794613	MVD	mevalonate diphosphate decarboxylase	Cytoplasm	enzyme
-3.485	A_44_P199211	PLCB1	phospholipase C beta 1	Cytoplasm	enzyme
-3.492	A_44_P233963	MRAS	muscle RAS oncogene homolog	Plasma Membrane	enzyme
-3.498	A_44_P314087	LOC102552073/LOC681186	hypothetical protein LOC681186	Other	other
-3.502	A_44_P432826	RAP1GDS1	Rap1 GTPase-GDP dissociation stimulator 1	Cytoplasm	other
-3.506	A_42_P569832	RAB6B	RAB6B, member RAS oncogene family	Cytoplasm	enzyme
-3.518	A_44_P793922	CACNA1A	calcium voltage-gated channel subunit alpha1 A	Plasma Membrane	ion channel
-3.518	A_44_P768438	NRSN1	neurensin 1	Plasma Membrane	other
-3.519	A_44_P555261	ALDH6A1	aldehyde dehydrogenase 6 family member A1	Cytoplasm	enzyme
-3.524	A_43_P10134	HECW2	HECT, C2 and WW domain containing E3 ubiquitin protein ligase 2	Extracellular Space	enzyme
-3.534	A_42_P637037	CLCN3	chloride voltage-gated channel 3	Plasma Membrane	ion channel
-3.567	A_42_P699217	SOX2	SRY-box 2	Nucleus	transcription regulator
-3.573	A_44_P540690	SLC5A3	solute carrier family 5 member 3	Plasma Membrane	transporter
-3.583	A_42_P453976	Ifitm6	interferon induced transmembrane protein 6	Other	other
-3.592	A_43_P12855	OLFM1	olfactomedin 1	Cytoplasm	other
-3.599	A_43_P13051	ST8SIA2	ST8 alpha-N-acetyl-neuraminide alpha-2,8-sialyltransferase 2	Cytoplasm	enzyme
-3.601	A_44_P186225	PPP1R16B	protein phosphatase 1 regulatory subunit 16B	Plasma Membrane	phosphatase
-3.621	A_44_P547168	INSIG1	insulin induced gene 1	Cytoplasm	other
-3.622	A_44_P443465	HEPACAM	hepatic and glial cell adhesion molecule	Plasma Membrane	other
-3.674	A_44_P260475	HDAC11	histone deacetylase 11	Nucleus	transcription regulator
-3.676	A_44_P788634	MUM1L1	MUM1 like 1	Cytoplasm	other
-3.682	A_44_P283030	Scd2	stearoyl-Coenzyme A desaturase 2	Cytoplasm	enzyme
-3.688	A_42_P573118	C21orf2	chromosome 21 open reading frame 2	Cytoplasm	other
-3.69	A_44_P897781	HSD17B7	hydroxysteroid 17-beta dehydrogenase 7	Cytoplasm	enzyme
-3.69	A_43_P12665	MMP24	matrix metallopeptidase 24	Plasma Membrane	peptidase
-3.702	A_42_P807826	SYNE1	spectrin repeat containing nuclear envelope protein 1	Nucleus	other
-3.702	A_42_P816427	WISP1	WNT1 inducible signaling pathway protein 1	Extracellular Space	other
-3.722	A_42_P543633	GLRB	glycine receptor beta	Plasma Membrane	ion channel
-3.733	A_44_P496447	NTF3	neurotrophin 3	Extracellular Space	growth factor
-3.758	A_44_P666098	BEAN1	brain expressed associated with NEDD4 1	Other	other
-3.761	A_44_P135641	RAPSN	receptor associated protein of the synapse	Plasma Membrane	other
-3.774	A_44_P994492	DDAH1	dimethylarginine dimethylaminohydrolase 1	Cytoplasm	enzyme
-3.795	A_44_P260375	COBLL1	cordon-bleu WH2 repeat protein like 1	Extracellular Space	other
-3.83	A_44_P168285	CYP51A1	cytochrome P450 family 51 subfamily A member 1	Cytoplasm	enzyme
-3.834	A_44_P550237	MAPT	microtubule associated protein tau	Plasma Membrane	other
-3.852	A_43_P16493	PMP2	peripheral myelin protein 2	Cytoplasm	other
-3.861	A_44_P354244	FRRS1L	ferric chelate reductase 1 like	Cytoplasm	transporter
-3.861	A_44_P391982	MMD	monocyte to macrophage differentiation associated	Plasma Membrane	kinase
-3.873	A_44_P103309	SGPP2	sphingosine-1-phosphate phosphatase 2	Cytoplasm	phosphatase
-3.885	A_44_P387623	GAS2	growth arrest specific 2	Cytoplasm	other
-3.912	A_44_P274083	AQP11	aquaporin 11	Plasma Membrane	transporter
-3.941	A_44_P499171	Mtmr7	myotubularin related protein 7	Cytoplasm	other
-3.956	A_44_P318707	ACAT2	acetyl-CoA acetyltransferase 2	Cytoplasm	enzyme
-4.004	A_44_P1009656	9530053A07Rik	RIKEN cDNA 9530053A07 gene	Other	other
-4.01	A_44_P868920	THRB	thyroid hormone receptor beta	Nucleus	ligand-dependent nuclear receptor
-4.015	A_44_P147055	GJB1	gap junction protein beta 1	Plasma Membrane	transporter
-4.025	A_44_P432452	AKR1B1	aldo-keto reductase family 1 member B	Cytoplasm	enzyme
-4.028	A_43_P12779	NRN1	neuritin 1	Cytoplasm	other
-4.029	A_44_P398193	CGREF1	cell growth regulator with EF-hand domain 1	Extracellular Space	other
-4.029	A_44_P151230	LPL	lipoprotein lipase	Cytoplasm	enzyme
-4.031	A_44_P914022	SYCE3	synaptonemal complex central element protein 3	Nucleus	other
-4.036	A_44_P251944	IDI1	isopentenyl-diphosphate delta isomerase 1	Cytoplasm	enzyme
-4.051	A_44_P181548	PIP4K2A	phosphatidylinositol-5-phosphate 4-kinase type 2 alpha	Cytoplasm	kinase
-4.066	A_43_P22542	NSDHL	NAD(P) dependent steroid dehydrogenase-like	Cytoplasm	enzyme
-4.076	A_44_P637687	KIAA1549L	KIAA1549 like	Cytoplasm	other
-4.112	A_44_P406957	CYB561	cytochrome b561	Cytoplasm	enzyme
-4.134	A_44_P553507	ZPLD1	zona pellucida like domain containing 1	Other	other
-4.169	A_44_P376043	ATP8A1	ATPase phospholipid transporting 8A1	Cytoplasm	transporter
-4.194	A_44_P310168	TGFA	transforming growth factor alpha	Extracellular Space	growth factor
-4.198	A_44_P288629	BEX1	brain expressed X-linked 1	Other	other
-4.22	A_42_P487567	DSP	desmoplakin	Plasma Membrane	other
-4.263	A_44_P269930	MFSD2A	major facilitator superfamily domain containing 2A	Plasma Membrane	transporter
-4.265	A_44_P613170	LOC100909913/Ndp	NDP, norrin cystine knot growth factor	Extracellular Space	cytokine
-4.289	A_44_P203355	HAPLN2	hyaluronan and proteoglycan link protein 2	Extracellular Space	other
-4.298	A_44_P306162	UGT8	UDP glycosyltransferase 8	Cytoplasm	enzyme
-4.331	A_44_P234071	GPAT3	glycerol-3-phosphate acyltransferase 3	Cytoplasm	enzyme
-4.35	A_44_P180012	DGAT2	diacylglycerol O-acyltransferase 2	Cytoplasm	enzyme
-4.356	A_42_P624773	CPZ	carboxypeptidase Z	Extracellular Space	peptidase
-4.366	A_44_P149161	PSAT1	phosphoserine aminotransferase 1	Cytoplasm	enzyme
-4.401	A_44_P278975	SLC39A8	solute carrier family 39 member 8	Extracellular Space	transporter
-4.469	A_43_P15576	Chn1	chimerin 1	Plasma Membrane	other
-4.472	A_44_P132960	S100A3	S100 calcium binding protein A3	Other	transporter
-4.478	A_43_P12200	SLC26A1	solute carrier family 26 member 1	Plasma Membrane	transporter
-4.497	A_44_P962754	RDH12	retinol dehydrogenase 12 (all-trans/9-cis/11-cis)	Cytoplasm	enzyme
-4.499	A_43_P15613	NRTN	neurturin	Extracellular Space	growth factor
-4.512	A_44_P501593	ACSS2	acyl-CoA synthetase short-chain family member 2	Cytoplasm	enzyme
-4.538	A_44_P428437	MIA	melanoma inhibitory activity	Extracellular Space	other
-4.542	A_44_P640345	GADL1	glutamate decarboxylase like 1	Cytoplasm	enzyme
-4.56	A_44_P110429	FAM57A	family with sequence similarity 57 member A	Plasma Membrane	other
-4.564	A_43_P15496	MS4A2	membrane spanning 4-domains A2	Plasma Membrane	transmembrane receptor
-4.589	A_43_P15451	TPSAB1/TPSB2	tryptase alpha/beta 1	Extracellular Space	peptidase
-4.617	A_44_P364961	RHOBTB3	Rho related BTB domain containing 3	Cytoplasm	enzyme
-4.621	A_44_P175703	MGC114492/RGD1559726	similar to melanoma antigen family A, 6	Other	other
-4.648	A_42_P544328	Cd99l2	CD99 molecule-like 2	Plasma Membrane	other
-4.654	A_42_P641962	PCSK6	proprotein convertase subtilisin/kexin type 6	Extracellular Space	peptidase
-4.715	A_44_P426529	ME3	malic enzyme 3	Cytoplasm	enzyme
-4.751	A_44_P359121	DCLK3	doublecortin like kinase 3	Cytoplasm	kinase
-4.781	A_44_P549075	PLA2G5	phospholipase A2 group V	Extracellular Space	enzyme
-4.793	A_44_P624624	ESYT3	extended synaptotagmin 3	Plasma Membrane	other
-4.81	A_44_P436399	Rimkla	ribosomal modification protein rimK-like family member A	Cytoplasm	enzyme
-4.831	A_44_P477224	TTC9B	tetratricopeptide repeat domain 9B	Other	other
-4.851	A_44_P487240	HMGCS1	3-hydroxy-3-methylglutaryl-CoA synthase 1	Cytoplasm	enzyme
-4.868	A_44_P529426	ERBB4	erb-b2 receptor tyrosine kinase 4	Plasma Membrane	kinase
-4.878	A_44_P687109	ARHGEF37	Rho guanine nucleotide exchange factor 37	Other	other
-4.883	A_44_P960765	CHODL	chondrolectin	Plasma Membrane	other
-4.909	A_44_P243295	LOC100912723	CD209 antigen-like protein A-like	Other	other
-4.913	A_44_P290074	COL4A3BP	collagen type IV alpha 3 binding protein	Cytoplasm	kinase
-4.935	A_44_P356027	SC5D	sterol-C5-desaturase	Cytoplasm	enzyme
-4.94	A_43_P12162	PPP2R2B	protein phosphatase 2 regulatory subunit Bbeta	Cytoplasm	phosphatase
-4.955	A_44_P883087	RGS13	regulator of G protein signaling 13	Nucleus	other
-5.016	A_44_P177434	GPM6A	glycoprotein M6A	Plasma Membrane	ion channel
-5.022	A_44_P343393	FXYD3	FXYD domain containing ion transport regulator 3	Plasma Membrane	other
-5.048	A_42_P825274	HSPB2	heat shock protein family B (small) member 2	Cytoplasm	other
-5.06	A_43_P18922	SEMA5A	semaphorin 5A	Plasma Membrane	transmembrane receptor
-5.07	A_44_P321867	FAM213A	family with sequence similarity 213 member A	Extracellular Space	other
-5.071	A_44_P167951	PKIA	cAMP-dependent protein kinase inhibitor alpha	Cytoplasm	other
-5.075	A_44_P347250	DHCR24	24-dehydrocholesterol reductase	Cytoplasm	enzyme
-5.077	A_44_P118625	CALB1	calbindin 1	Cytoplasm	other
-5.094	A_44_P245835	C14orf37	chromosome 14 open reading frame 37	Extracellular Space	other
-5.132	A_44_P466757	GRAMD2A	GRAM domain containing 2A	Other	other
-5.164	A_43_P14604	CLSTN2	calsyntenin 2	Plasma Membrane	transporter
-5.206	A_42_P631818	CNMD	chondromodulin	Extracellular Space	other
-5.234	A_44_P367481	P2RX6	purinergic receptor P2X 6	Plasma Membrane	ion channel
-5.253	A_42_P814765	TM7SF2	transmembrane 7 superfamily member 2	Cytoplasm	enzyme
-5.259	A_42_P784541	MPV17L	MPV17 mitochondrial inner membrane protein like	Cytoplasm	other
-5.304	A_44_P538165	TSPAN17	tetraspanin 17	Other	enzyme
-5.331	A_44_P511034	VEPH1	ventricular zone expressed PH domain containing 1	Nucleus	other
-5.38	A_44_P378562	FMO3	flavin containing monooxygenase 3	Cytoplasm	enzyme
-5.402	A_43_P12868	SMPD3	sphingomyelin phosphodiesterase 3	Cytoplasm	enzyme
-5.418	A_44_P197064	TMEM63C	transmembrane protein 63C	Other	ion channel
-5.45	A_44_P1071620	MMP27	matrix metallopeptidase 27	Cytoplasm	peptidase
-5.504	A_43_P12330	SLC13A3	solute carrier family 13 member 3	Plasma Membrane	transporter
-5.517	A_43_P13454	AIF1L	allograft inflammatory factor 1 like	Plasma Membrane	other
-5.583	A_44_P398330	Gm4952	predicted gene 4952	Cytoplasm	other
-5.628	A_44_P374733	TRHR	thyrotropin releasing hormone receptor	Plasma Membrane	G-protein coupled receptor
-5.653	A_44_P390247	PRRG3	proline rich and Gla domain 3	Plasma Membrane	other
-5.678	A_44_P517858	SVOP	SV2 related protein	Cytoplasm	transporter
-5.694	A_43_P11481	ME1	malic enzyme 1	Cytoplasm	enzyme
-5.699	A_44_P295531	9530003J23Rik	RIKEN cDNA 9530003J23 gene	Extracellular Space	other
-5.768	A_44_P452145	CAMK2B	calcium/calmodulin dependent protein kinase II beta	Cytoplasm	kinase
-5.788	A_44_P308925	ABAT	4-aminobutyrate aminotransferase	Cytoplasm	enzyme
-5.796	A_42_P578386	TSSK2	testis specific serine kinase 2	Cytoplasm	kinase
-5.815	A_42_P830311	MRAP	melanocortin 2 receptor accessory protein	Cytoplasm	other
-5.819	A_43_P19094	ELOVL7	ELOVL fatty acid elongase 7	Cytoplasm	enzyme
-5.828	A_43_P16988	FA2H	fatty acid 2-hydroxylase	Cytoplasm	enzyme
-5.855	A_44_P241448	Arxes1/Arxes2	adipocyte-related X-chromosome expressed sequence 2	Cytoplasm	other
-5.855	A_42_P478101	EPHX4	epoxide hydrolase 4	Other	enzyme
-5.89	A_44_P781948	Coch	cochlin	Cytoplasm	other
-5.893	A_44_P118724	ARC	activity regulated cytoskeleton associated protein	Cytoplasm	other
-5.901	A_44_P202424	Rapgef5	Rap guanine nucleotide exchange factor 5	Nucleus	other
-5.935	A_43_P11752	MAOB	monoamine oxidase B	Cytoplasm	enzyme
-5.954	A_44_P308662	RET	ret proto-oncogene	Plasma Membrane	kinase
-5.963	A_44_P132714	PCLO	piccolo presynaptic cytomatrix protein	Cytoplasm	transporter
-6.073	A_44_P578505	LOC100364027	hexokinase 1-like	Cytoplasm	other
-6.083	A_44_P264785	SLC38A1	solute carrier family 38 member 1	Plasma Membrane	transporter
-6.095	A_44_P1017996	WDR17	WD repeat domain 17	Other	other
-6.174	A_44_P263037	PNPLA3	patatin like phospholipase domain containing 3	Cytoplasm	enzyme
-6.258	A_44_P949804	LGR6	leucine rich repeat containing G protein-coupled receptor 6	Plasma Membrane	G-protein coupled receptor
-6.259	A_43_P12115	PROM1	prominin 1	Plasma Membrane	other
-6.291	A_44_P111489	ELOVL6	ELOVL fatty acid elongase 6	Cytoplasm	enzyme
-6.332	A_44_P314110	ERMN	ermin	Extracellular Space	other
-6.366	A_44_P376994	LSAMP	limbic system-associated membrane protein	Plasma Membrane	other
-6.406	A_43_P10290	TSPAN1	tetraspanin 1	Cytoplasm	other
-6.891	A_44_P821386	Aldh1a7	aldehyde dehydrogenase family 1, subfamily A7	Cytoplasm	enzyme
-6.915	A_44_P870348	SLC35D3	solute carrier family 35 member D3	Cytoplasm	other
-7.053	A_42_P737738	SLC18A3	solute carrier family 18 member A3	Plasma Membrane	transporter
-7.236	A_44_P747182	UNC13C	unc-13 homolog C	Cytoplasm	other
-7.242	A_44_P1042952	Hrk	harakiri, BCL2 interacting protein (contains only BH3 domain)	Cytoplasm	other
-7.374	A_44_P685554	DCDC2	doublecortin domain containing 2	Extracellular Space	other
-7.489	A_44_P309979	CHST2	carbohydrate sulfotransferase 2	Cytoplasm	enzyme
-7.55	A_44_P276724	Slc25a48	solute carrier family 25, member 48	Cytoplasm	other
-7.585	A_44_P157881	FMO2	flavin containing monooxygenase 2	Cytoplasm	enzyme
-7.693	A_44_P349209	LOC100363914 (includes others)	similar to DC-SIGN	Other	other
-8.027	A_44_P123543	LIN7A	lin-7 homolog A, crumbs cell polarity complex component	Plasma Membrane	other
-8.279	A_44_P424148	GLDC	glycine decarboxylase	Cytoplasm	enzyme
-8.387	A_44_P361161	LYPD6B	LY6/PLAUR domain containing 6B	Other	other
-8.393	A_42_P466362	ADCY8	adenylate cyclase 8	Plasma Membrane	enzyme
-8.522	A_44_P327799	Apoc3	apolipoprotein C-III	Extracellular Space	transporter
-9.002	A_44_P478172	Tdpoz2	TD and POZ domain containing 2	Other	other
-9.589	A_44_P135066	GALNT13	polypeptide N-acetylgalactosaminyltransferase 13	Cytoplasm	enzyme
-9.978	A_44_P400756	CSMD1	CUB and Sushi multiple domains 1	Plasma Membrane	other
-10.347	A_42_P541962	C1QTNF4	C1q and TNF related 4	Extracellular Space	other
-10.708	A_44_P791404	Luzp2	leucine zipper protein 2	Other	other
-11.083	A_44_P1047441	LRP2	LDL receptor related protein 2	Plasma Membrane	transporter
-11.134	A_43_P15978	FGF4	fibroblast growth factor 4	Extracellular Space	growth factor
[truncated: 10 more rows]
