# Supplementary material for: Transcriptomic Landscapes of Immune Response and Axonal Regeneration by Integrative Analysis of Molecular Pathways and Interactive Networks Post-sciatic Nerve Transection
Source: Front Neurosci. 2018 Jul 9;12:457. doi: 10.3389/fnins.2018.00457 (PMC6046400; doi:10.3389/fnins.2018.00457)
Supplement: Supplementary file 2 [file Table_2.XLS]

## Sheet: immune response
Ingenuity Canonical Pathways-immune response (1d)	-log(p-value)	Ratio	z-score	Molecules
Fcγ Receptor-mediated Phagocytosis in Macrophages and Monocytes	4.73	0.151	3.207	HMOX1,RAC2,NCF1,MAPK1,FCGR2A,SYK,GPLD1,HCK,VAV1,ACTG2,FCGR1A,INPP5D,LCP2,FGR
TREM1 Signaling	3.74	0.147	3.317	TLR2,CXCL3,IL18,NLRP3,MAPK1,TYROBP,IL1RL1,IL6,STAT3,FCGR2B,NLRC4
Dendritic Cell Maturation	3.65	0.1	1.5	HLA-DOA,TRB,MAPK1,TYROBP,LEPR,FCGR2A,IL6,FCGR2B,MAPK11,FCGR1A,IL33,TLR2,IL18,IL1RN,NGFR,PLCB1,IRF8,COL11A2,HLA-DRB5
IL-6 Signaling	3.26	0.11	2.309	SOCS3,MAPK1,IL1RL1,IL6,STAT3,MAPK11,IL33,IL1R2,IL18,IL1RN,NGFR,MRAS,CD14,LBP
Production of Nitric Oxide and Reactive Oxygen Species in Macrophages	2.71	0.0881	2.668	MAPK1,APOC4,MAP3K13,ARG2,MAPK11,PPP1R14B,TLR2,NCF1,LYZ,RHOT1,CYBA,NGFR,NCF2,PPP2R2B,CYBB,S100A8,IRF8
p38 MAPK Signaling	2.6	0.103	2.333	IL33,FADD,IL1R2,IL18,IL1RN,IL1RL1,MAPT,PLA2G10,PLA2G5,RPS6KA1,MAPK11,PLA2G2A
Toll-like Receptor Signaling	2.57	0.122	2.828	IL33,TLR2,IL18,MAPK1,IL1RN,IL1RL1,CD14,LBP,MAPK11
Granzyme B Signaling	2.51	0.25	2	CASP3,LMNB2,BID,LMNB1
NF-κB Signaling	2.24	0.0833	1.291	TNFSF11,TRB,UBE2N,NGF,IL33,TLR2,IL1R2,FADD,IL18,NTRK2,IL1RN,NGFR,TGFA,MRAS,EGFR
Th2 Pathway	2.14	0.0867	1.89	SOCS3,RUNX3,HLA-DOA,TRB,IL4R,IL12RB1,IL1RL1,CD3D,IL33,ITGB2,NFATC2,VAV1,HLA-DRB5
Ingenuity Canonical Pathways-immune response (4d)	-log(p-value)	Ratio	z-score	Molecules
Fcγ Receptor-mediated Phagocytosis in Macrophages and Monocytes	7.45	0.237	3.411	RAC2,MAPK1,ARPC1B,FCGR2A,RAC1,FCGR1A,INPP5D,PLD1,HMOX1,PAK1,NCF1,SYK,GPLD1,HCK,AKT3,VAV1,ACTG2,PRKD1,LCP2,FGR,PRKCB,PRKCA
Dendritic Cell Maturation	6.7	0.168	3.528	MAPK1,LEPR,NFKBIE,CD83,IL6,HLA-DQB1,FCGR2B,FCGR1A,MAPK11,PLCD1,LOC100909593/RT1-DMa,LOC100909630/RT1-DMb,DDR2,NGFR,CREB1,HLA-DRA,AKT3,PLCB1,COL11A2,COL18A1,TRB,TYROBP,FCGR2A,COL2A1,TLR2,STAT4,IL18,IL1RN,H2-Eb2,CD86,PIK3CD,IRF8
Role of NFAT in Regulation of the Immune Response	6.46	0.168	3.651	CD247,BLNK,MAPK1,CD3E,NFKBIE,KRAS,HLA-DQB1,FCGR2B,FCGR1A,LCK,LOC100909593/RT1-DMa,GNA15,LOC100909630/RT1-DMb,HLA-DRA,MRAS,AKT3,PLCB1,ITK,TRB,FCGR2A,GNAZ,CD3D,H2-Eb2,SYK,LAT,ZAP70,MS4A2,CD86,PIK3CD,RCAN2,LCP2
PKCθ Signaling in T Lymphocytes	6.35	0.189	2.985	CD247,RAC2,TRB,MAPK1,CD3E,NFKBIE,MAP3K13,RAC1,KRAS,HLA-DQB1,CD3D,LOC100909593/RT1-DMa,LCK,LOC100909630/RT1-DMb,CARD11,H2-Eb2,HLA-DRA,ZAP70,LAT,MRAS,CD86,VAV1,PIK3CD,LCP2,CAMK2B
CD28 Signaling in T Helper Cells	5.85	0.183	3.742	CD247,TRB,CD3E,ARPC1B,NFKBIE,RAC1,HLA-DQB1,CD3D,LCK,LOC100909593/RT1-DMa,PAK1,LOC100909630/RT1-DMb,CARD11,H2-Eb2,SYK,ZAP70,LAT,HLA-DRA,CD86,AKT3,PIK3CD,VAV1,LCP2,ITK
Th1 Pathway	5.61	0.178	3.771	CD247,RUNX3,SOCS3,TNFSF11,TRB,CD3E,KLRD1,CXCR3,STAT3,HLA-DQB1,IL6,CD8A,CD3D,STAT4,ITGB2,LOC100909593/RT1-DMa,IL18,LOC100909630/RT1-DMb,H2-Eb2,HLA-DRA,IL10RA,CD86,PIK3CD,VAV1
iCOS-iCOSL Signaling in T Helper Cells	5.3	0.18	3.153	CD247,TRB,CD3E,NFKBIE,RAC1,HLA-DQB1,CD3D,INPP5D,LCK,LOC100909593/RT1-DMa,LOC100909630/RT1-DMb,H2-Eb2,ZAP70,LAT,HLA-DRA,AKT3,PIK3CD,VAV1,LCP2,ITK,CAMK2B,IL2RB
TREM1 Signaling	4.97	0.213	4	NLRP3,MAPK1,IL1RL1,TYROBP,NLRP10,CIITA,CD83,IL6,STAT3,FCGR2B,TLR2,CXCL3,IL18,CD86,AKT3,NLRC4
Cytotoxic T Lymphocyte-mediated Apoptosis of Target Cells	4.85	0.312	1.265	CD247,FADD,CASP6,TRB,PRF1,CASP3,CD3E,BID,CD3D,FASLG
PI3K Signaling in B Lymphocytes	4.45	0.164	1.528	BLNK,IL4R,C3,MAPK1,ATF5,NFKBIE,RAC1,KRAS,FCGR2B,INPP5D,PLCD1,CD180,SYK,CREB1,MRAS,PLCB1,AKT3,PIK3CD,VAV1,PRKCB,CAMK2B
Ingenuity Canonical Pathways-immune response (7d)	-log(p-value)	Ratio	z-score	Molecules
Role of NFAT in Regulation of the Immune Response	8.55	0.189	3.889	CD247,BLNK,HLA-DOA,MAPK1,CD3E,NFKBIE,HLA-DQB1,FCGR2B,FCGR1A,GNB4,LOC100909593/RT1-DMa,LCK,JUN,GNA15,LOC100909630/RT1-DMb,HLA-DRA,MRAS,PLCB1,ITK,TRB,FCGR2A,GNAZ,CD3D,H2-Eb2,SYK,LAT,ZAP70,GNB2,MS4A2,GNAT2,CD86,PIK3CD,RCAN2,HLA-DRB5,LCP2
Th1 Pathway	7.27	0.2	4.146	CD247,SOCS3,HLA-DOA,CD3E,IL12RB1,KLRD1,CXCR3,IL6,HLA-DQB1,CD8A,LOC100909593/RT1-DMa,LOC100909630/RT1-DMb,HLA-DRA,RUNX3,TNFSF11,TRB,STAT3,CD3D,STAT4,ITGB2,IL18,H2-Eb2,IL10RA,CD86,PIK3CD,VAV1,HLA-DRB5
Dendritic Cell Maturation	7.16	0.174	3.651	HLA-DOA,MAPK1,LEPR,NFKBIE,CD83,IL6,HLA-DQB1,FCGR2B,FCGR1A,MAPK11,PLCD1,LOC100909593/RT1-DMa,LOC100909630/RT1-DMb,DDR2,NGFR,HLA-DRA,PLCB1,TLR3,COL11A2,COL18A1,TRB,TYROBP,FCGR2A,COL2A1,TLR2,STAT4,IL18,IL1RN,H2-Eb2,CD86,PIK3CD,IRF8,HLA-DRB5
PKCθ Signaling in T Lymphocytes	6.89	0.197	3.545	CD247,RAC2,TRB,HLA-DOA,MAPK1,CD3E,NFKBIE,MAP3K13,HLA-DQB1,CD3D,LCK,LOC100909593/RT1-DMa,JUN,LOC100909630/RT1-DMb,CARD11,H2-Eb2,HLA-DRA,ZAP70,LAT,MRAS,CD86,VAV1,PIK3CD,LCP2,HLA-DRB5,CAMK2B
CD28 Signaling in T Helper Cells	6.38	0.191	3.606	CD247,TRB,HLA-DOA,CD3E,ARPC1B,NFKBIE,HLA-DQB1,CD3D,PAK1,LOC100909593/RT1-DMa,LCK,JUN,LOC100909630/RT1-DMb,CARD11,H2-Eb2,SYK,HLA-DRA,ZAP70,LAT,CD86,VAV1,PIK3CD,LCP2,HLA-DRB5,ITK
Th2 Pathway	6.3	0.18	1.291	CD247,SOCS3,HLA-DOA,TNFSF4,CD3E,IL12RB1,IL1RL1,CHD4,HLA-DQB1,LOC100909593/RT1-DMa,JUN,LOC100909630/RT1-DMb,TGFB1,HLA-DRA,IL2RB,RUNX3,IL4R,TRB,CD3D,STAT4,ITGB2,H2-Eb2,CXCR6,CD86,PIK3CD,VAV1,HLA-DRB5
Fcγ Receptor-mediated Phagocytosis in Macrophages and Monocytes	6.08	0.215	2.683	RAC2,MAPK1,ARPC1B,FCGR2A,FCGR1A,INPP5D,PLD1,HMOX1,PAK1,NCF1,SYK,GPLD1,HCK,RAB11A,VAV1,PRKD1,LCP2,FGR,PRKCB,PRKCA
Calcium-induced T Lymphocyte Apoptosis	5.71	0.242	2.84	CD247,HLA-DOA,TRB,CD3E,HLA-DQB1,CD3D,LOC100909593/RT1-DMa,LCK,LOC100909630/RT1-DMb,H2-Eb2,ZAP70,HLA-DRA,PRKD1,HLA-DRB5,PRKCA,PRKCB
iCOS-iCOSL Signaling in T Helper Cells	5.27	0.18	3.153	CD247,HLA-DOA,TRB,CD3E,NFKBIE,HLA-DQB1,CD3D,INPP5D,LCK,LOC100909593/RT1-DMa,LOC100909630/RT1-DMb,H2-Eb2,ZAP70,LAT,HLA-DRA,PIK3CD,VAV1,HLA-DRB5,LCP2,ITK,CAMK2B,IL2RB
TREM1 Signaling	4.32	0.2	3.873	TLR2,IL18,NLRP3,MAPK1,TYROBP,IL1RL1,NLRP10,CIITA,CD86,CD83,TLR3,STAT3,IL6,FCGR2B,NLRC4
Ingenuity Canonical Pathways-immune response (14d)	-log(p-value)	Ratio	z-score	Molecules
Role of NFAT in Regulation of the Immune Response	9.54	0.178	3.536	CD247,BLNK,HLA-DOA,MAPK1,CD3E,NFKBIE,HLA-DQB1,FCGR2B,FCGR1A,LCK,LOC100909593/RT1-DMa,JUN,GNA15,HLA-DRA,MRAS,PLCB1,ITK,TRB,FCGR2A,GNAZ,CD3D,H2-Eb2,SYK,GNAO1,LAT,ZAP70,MS4A2,CD86,GNAT2,PIK3CD,RCAN2,HLA-DRB5,LCP2
Th1 Pathway	8.38	0.193	4.025	CD247,SOCS3,HLA-DOA,CD3E,IL12RB1,KLRD1,CXCR3,IL6,HLA-DQB1,CD8A,LOC100909593/RT1-DMa,HLA-DRA,RUNX3,TNFSF11,TRB,STAT3,CD3D,STAT4,ITGB2,IL18,H2-Eb2,IL10RA,CD86,PIK3CD,VAV1,HLA-DRB5
Dendritic Cell Maturation	7.46	0.158	3.657	HLA-DOA,MAPK1,NFKBIE,CD83,IL6,HLA-DQB1,FCGR2B,MAPK11,FCGR1A,PLCD1,LOC100909593/RT1-DMa,NGFR,HLA-DRA,PLCB1,COL11A2,COL18A1,TRB,TYROBP,FCGR2A,COL2A1,TLR2,STAT4,COL1A1,IL18,IL1RN,H2-Eb2,CD86,PIK3CD,IRF8,HLA-DRB5
PKCθ Signaling in T Lymphocytes	7.29	0.182	3.71	CD247,RAC2,HLA-DOA,TRB,MAPK1,CD3E,NFKBIE,HLA-DQB1,CD3D,LCK,LOC100909593/RT1-DMa,JUN,CARD11,H2-Eb2,ZAP70,LAT,HLA-DRA,MRAS,CD86,PIK3CD,VAV1,HLA-DRB5,LCP2,CAMK2B
CD28 Signaling in T Helper Cells	6.72	0.176	3.464	CD247,HLA-DOA,TRB,CD3E,NFKBIE,HLA-DQB1,CD3D,LCK,LOC100909593/RT1-DMa,PAK1,JUN,CARD11,H2-Eb2,SYK,ZAP70,LAT,HLA-DRA,CD86,PIK3CD,VAV1,HLA-DRB5,LCP2,ITK
Th2 Pathway	6.21	0.16	1.069	CD247,RUNX3,SOCS3,IL4R,HLA-DOA,TRB,CD3E,IL12RB1,IL1RL1,HLA-DQB1,CD3D,STAT4,ITGB2,LOC100909593/RT1-DMa,JUN,TGFB1,H2-Eb2,HLA-DRA,CXCR6,CD86,PIK3CD,VAV1,HLA-DRB5,IL2RB
iCOS-iCOSL Signaling in T Helper Cells	6.05	0.172	3	CD247,HLA-DOA,TRB,CD3E,NFKBIE,HLA-DQB1,CD3D,INPP5D,LCK,LOC100909593/RT1-DMa,H2-Eb2,ZAP70,LAT,HLA-DRA,PIK3CD,VAV1,HLA-DRB5,LCP2,ITK,CAMK2B,IL2RB
Calcium-induced T Lymphocyte Apoptosis	5.32	0.212	2.496	CD247,HLA-DOA,TRB,CD3E,HLA-DQB1,CD3D,LOC100909593/RT1-DMa,LCK,H2-Eb2,ZAP70,HLA-DRA,HLA-DRB5,PRKD1,PRKCA
Fcγ Receptor-mediated Phagocytosis in Macrophages and Monocytes	4.16	0.161	2.324	RAC2,MAPK1,FCGR2A,FCGR1A,INPP5D,PAK1,NCF1,SYK,GPLD1,HCK,VAV1,PRKD1,FGR,LCP2,PRKCA
TREM1 Signaling	4.01	0.173	3.606	TLR2,IL18,MAPK1,TYROBP,IL1RL1,NLRP10,CIITA,CD86,CD83,STAT3,IL6,FCGR2B,NLRC4

## Sheet: nervous system signaling
Ingenuity Canonical Pathways-nervous system signaling (1d)	-log(p-value)	Ratio	z-score	Molecules
CDK5 Signaling	2.7	0.111	-2.111	NTRK2,MAPK1,MAPT,NGFR,PPP2R2B,MRAS,ADCY8,NGF,MAPK11,PPP1R14B,CACNA1A
Agrin Interactions at Neuromuscular Junction	2.22	0.116	1.414	NRG1,RAC2,ITGB2,MAPK1,MRAS,ACTG2,ITGAL,EGFR
Ephrin B Signaling	2.07	0.11	1	RAC2,GNA15,MAPK1,CFL1,MRAS,GNAT2,VAV1,GNAZ
GNRH Signaling	1.47	0.0775	-1.265	GNA15,MAPK1,MAP3K13,GNRH1,MRAS,PLCB1,ADCY8,MAPK11,EGFR,CAMK2B
Ingenuity Canonical Pathways-nervous system signaling (4d)	-log(p-value)	Ratio	z-score	Molecules
Agrin Interactions at Neuromuscular Junction	3.58	0.188	1.155	NRG1,RAC2,ITGB2,PAK1,MAPK1,ERBB4,RAC1,ITGA6,MRAS,RAPSN,KRAS,ACTG2,ITGAL
CDK5 Signaling	2.11	0.131	-2.887	NTRK2,MAPK1,MAPT,NGFR,PPP2R2B,PPM1L,ITGA6,MRAS,KRAS,ADCY8,MAPK11,PPP1R14B,CACNA1A
Ephrin B Signaling	1.86	0.137	1.89	RAC2,PAK1,GNA15,CFL2,MAPK1,CFL1,RAC1,MRAS,VAV1,GNAZ
Ingenuity Canonical Pathways-nervous system signaling (7d)	-log(p-value)	Ratio	z-score	Molecules
Ephrin B Signaling	3.3	0.178	2.646	RAC2,MAPK1,EPHB2,GNAZ,GNB4,PAK1,GNA15,CFL2,MRAS,GNB2,EPHB3,GNAT2,VAV1
Agrin Interactions at Neuromuscular Junction	3	0.174	1.508	NRG1,RAC2,ITGB2,PAK1,JUN,MAPK1,ERBB4,ITGA6,MRAS,RAPSN,AGRN,ITGAL
CDK5 Signaling	1.37	0.111	-2.53	NTRK2,MAPK1,MAPT,NGFR,PPP2R2B,PPM1L,ITGA6,MRAS,ADCY8,MAPK11,CACNA1A
GDNF Family Ligand-Receptor Interactions	1.35	0.118	1	NRTN,JUN,MAPK1,GDNF,GFRA3,MRAS,PIK3CD,DOK3,RET
Ingenuity Canonical Pathways-nervous system signaling (14d)	-log(p-value)	Ratio	z-score	Molecules
Ephrin B Signaling	3.52	0.164	2.646	RAC2,PAK1,GNA15,CFL2,MAPK1,EPHB2,GNAO1,MRAS,GNAT2,EPHB3,VAV1,GNAZ
Agrin Interactions at Neuromuscular Junction	3.16	0.159	1.265	NRG1,RAC2,ITGB2,PAK1,JUN,MAPK1,ERBB4,ITGA6,MRAS,RAPSN,ITGAL
GDNF Family Ligand-Receptor Interactions	2.29	0.132	1.265	NRTN,JUN,MAPK1,GDNF,GFRA3,MRAS,GFRA2,PIK3CD,DOK3,RET
CDK5 Signaling	1.92	0.111	-2.53	NTRK2,MAPK1,MAPT,NGFR,PPP2R2B,PPM1L,ITGA6,MRAS,ADCY8,MAPK11,CACNA1A
Neurotrophin/TRK Signaling	1.4	0.105	1.134	NTF3,NTRK2,JUN,MAPK1,NGFR,MRAS,PIK3CD,RPS6KA1
